# Supplementary material for: Profiling single-cell histone modifications using indexing chromatin immunocleavage sequencing
Source: HighWire-hosted journal article supplement (doi:10.1101/gr.260893.120), 2021-04-14
Supplement: Supplemental_Script_Description.docx [file Supplemental_Script_Description.docx]

1. **Download the data.**
2. The script “script_donwload_fastq” contains the commands to download all fastq data. (total 960*2 fastq files). The software sratoolkit is required to download the data. In the terminal, the contents of “script_donwload_fastq” will be shown if enter the command “less script_donwload_fastq”. The contents are shown in Figure 1.


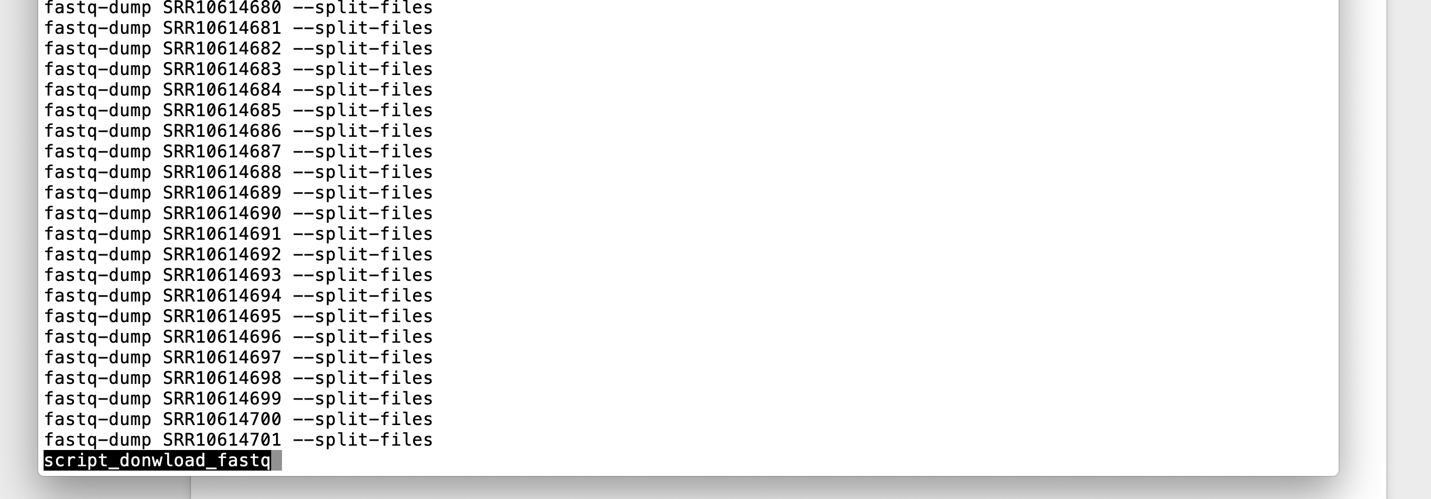


Figure 1. Contents in script_donwload_fastq

1. **Rename the downloaded fastq files.**
   1. For convention, fastq files downloaded from SRA will be renamed using the scripts “script_rename_H3K4me3_fastq” and “script_rename_H3K27me3_fastq”
   2. Enter the command in terminal as shown in Figure 2
   3. You can see the contents of script_rename_H3K4me3_fastq as shown in Figure 3


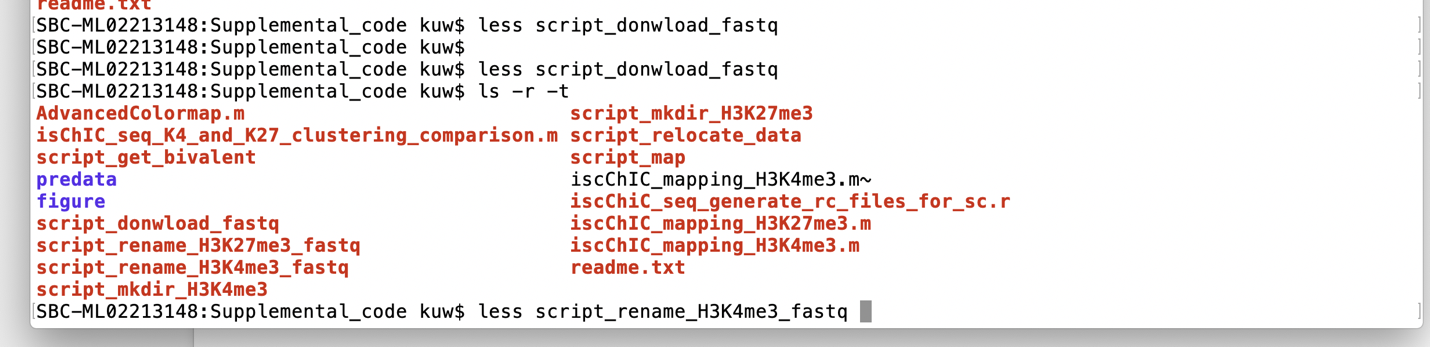


Figure 2 Command for open script_rename_H3K4me3_fastq

1. **Create directories for processing fastq data and relocate the fastq files**
   1. You can create the directory by enter the command “sh script_mkdir_H3K4me3” and “sh script_mkdir_H3K27me3”. The contents of script_mkdir_H3K4me3 is shown in Figure 4.
   2. Relocate the data by enter the command “sh script_relocate_data”. The contents of script_relocate_data is shown in Figure 5.


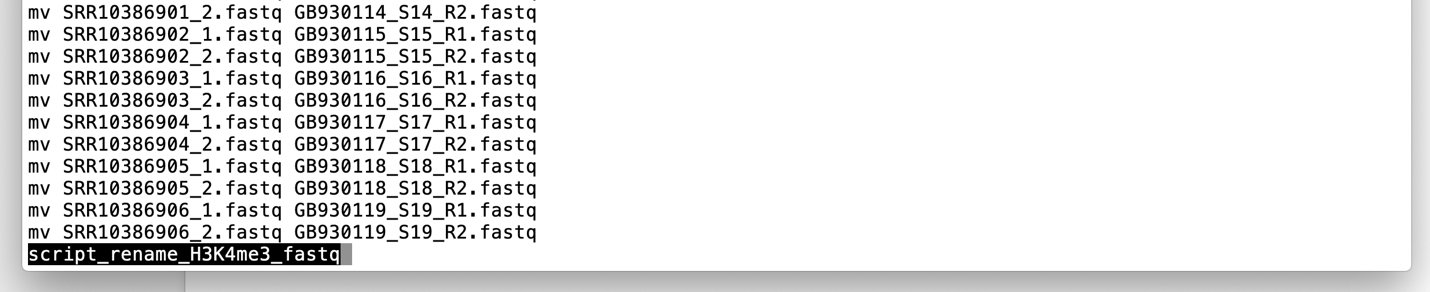


Figure 3. script_rename_H3K4me3_fastq


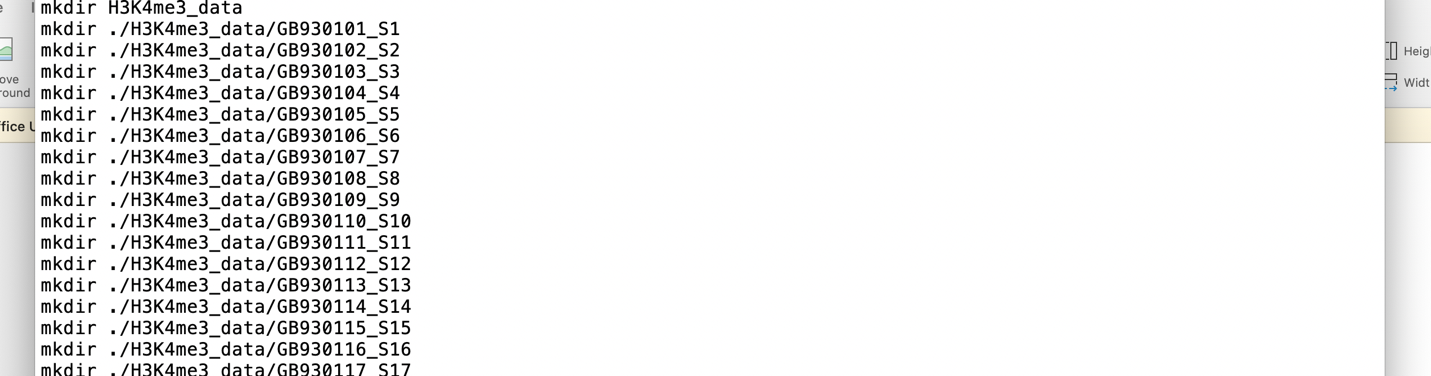


Figure 4 The contents of script_mkdir_H3K4me3


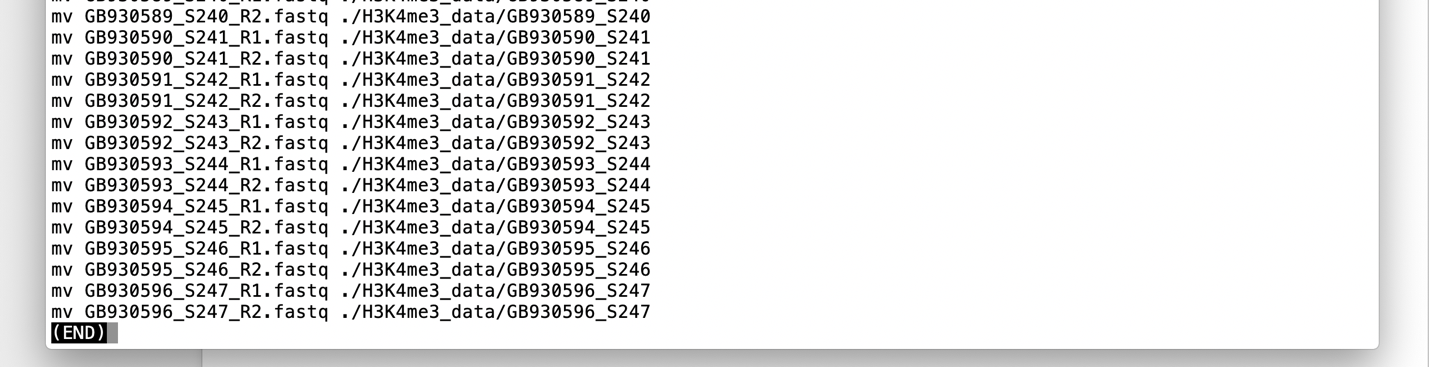


Figure 5. The contents of script_relocate_data

1. **Mapping fastq files to genome**
   1. Require Bowtie2 and Samtools
   2. You can enter the command “sh script_map” to do the mapping. The contents are shown in Figure 6 and Figure 7.


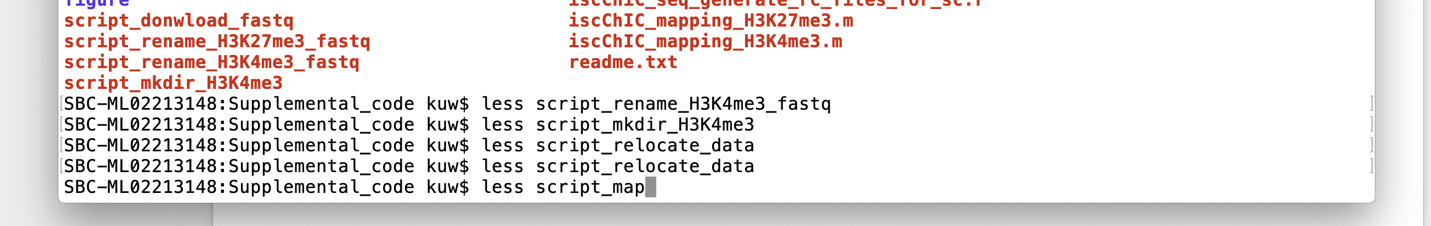


Figure 6. The command to open script_map


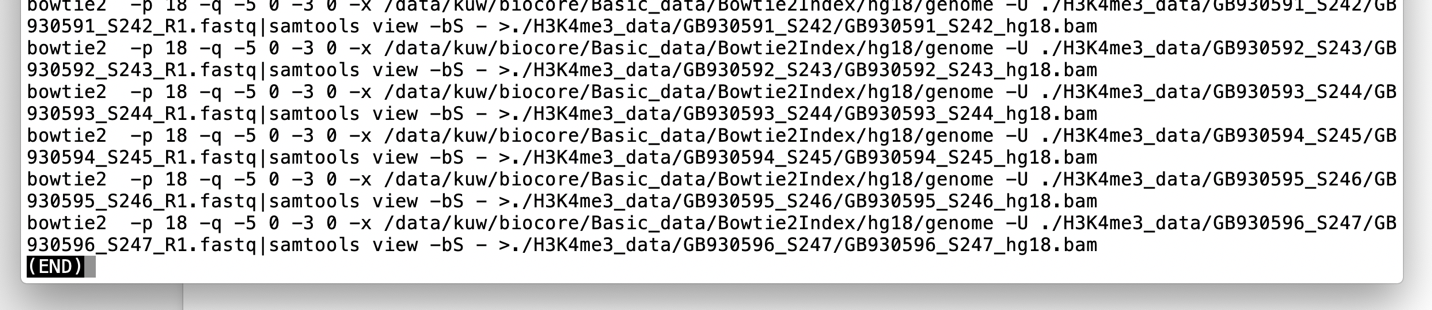


Figure 7. The content of scrip_map

1. **Generate the file of bivalent domains**
   1. Require Bedtools
   2. You can enter the command “sh script_generate_get_bivalent” to get the file of bivalent comains. The contents are shown in Figure 8 and Figure 9.


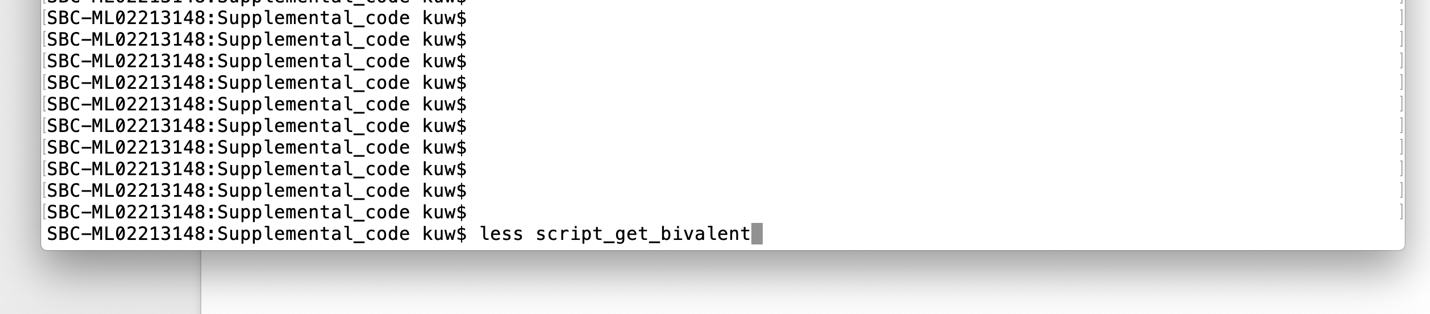


Figure 8. The command to open script_get_bivalent


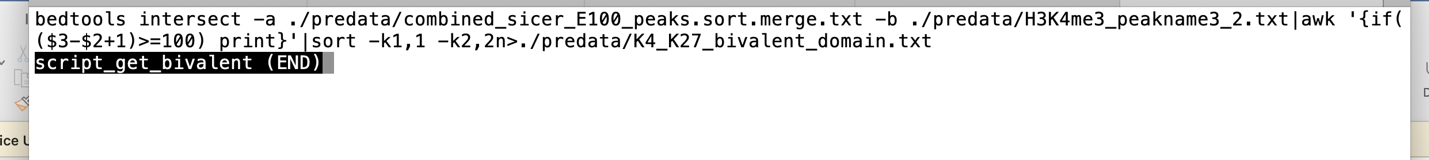


Figure 9. The contents of script_get_bivalent
