# Supplementary material for: Profiling single-cell histone modifications using indexing chromatin immunocleavage sequencing
Source: HighWire-hosted journal article supplement (doi:10.1101/gr.260893.120), 2021-04-14
Supplement: Supplemental_Table_S1_v2.xlsx [file Supplemental_Table_S1_v2.xlsx]

## Sheet: Table 1
Table S1. A comparison between iscChIC-seq and other methods.
Methods	Antibody	Samples	Cell number	Unique reads / cell	Mechanism	Feature	References
scChlP-seq (2015)	H3K4me3	mouse embryonic stem cells, embryonic fibroblasts and hematopoietic progenitors	193-4,643	~1,000	MNase cleavage, droplet containing barcoded adaptors, followed by immunoprecipitation	throughput rely on microfluidic devices	Rotem et al. 2015
	H3K4me2
scChlP-seq (2019)	H3K27me3	tumor cells	4331	5161	MNase cleavage, droplet containing beads with barcoded adaptors, followed by immunoprecipitation	throughput rely on droplet microfluidics platform	Grosselin et al. 2019
		mouse stromal cells	1766	3535
uliCUT&RUN	CTCF	mouse ESCs	120	~10,000	antibody-directed MNase-mediated cleavage	low throughout, apply to transcription factor	Hainer et al. 2019
scCUT&Tag	H3K27me3	human K562 cells	956	~1,000-10,000	antibody-directed tn5-mediated tagmentation	throughput rely on Takara ICELL8 nano-dispensing system	Kaya-Okur et al. 2019
	H3K4me2		808
iACT-seq	H3K4me3	HEK293T cells	1246	2500	antibody-directed tn5-mediated tagmentation	apply to active histone modification	Carter et al. 2019
CoBATCH	H3K27ac	native mouse ESCs	2100	12000	antibody-directed tn5-mediated tagmentation	optimal for active histone marks, throughput scaled by the number of 96-well plates	Wang et al. 2019
		fixed mouse ESCs	2388	9247
		fixed endothelial cells from mouse embrvos	2758	10100
	H3K36me3	fixed endothelial cells from mouse embrvos	388	7525
itChlP-seq	H3K27ac	fixed mouse ESCs and epiblast-like cells	1869	9016	tn5-mediated tagmentation followed by immunoprecipitation, single cell identified by index combinations.	throughput scaled by the number of 96-well plates	Ai et al. 2019
		fixed cells collected from cardiac cell lineage	81-119	8100
scChlC-seq	H3K4me3	fixed human white blood cells	285	100000	antibody-directed MNase-mediated cleavage, single cell sorted by flow cytometry	low throughput, one cell per tube	Ku et al. 2019
	H3K27me3		106	131000
iscChlC-seq	H3K4me3	double fixed human white blood cells	7500	11000	antibody-directed MNase-mediated cleavage, single cell identified by index combinations.	throughput scaled by the number of 96-well plates	This study
	H3K27me3		10000	25000
