# Supplementary material for: Profiling single-cell histone modifications using indexing chromatin immunocleavage sequencing
Source: HighWire-hosted journal article supplement (doi:10.1101/gr.260893.120), 2021-04-14
Supplement: Supplemental_Table_S2.xlsx [file Supplemental_Table_S2.xlsx]

## Sheet: Sheet1
Table S2. The information of the primer sequences
name	DNA sequences:	Cell barcode: Illumina R2 sequence 8bp
top-cs1-p7-Gbc1	/5phos/ ACACTGACGACATGGTTCTACAGTTCCAGATCGGAAGAGCACACGTCTGAACTCCAGTCAC/3SpC3/	GGAACTGT
top-cs1-p7-Gbc2	/5phos/ ACACTGACGACATGGTTCTACAGTAGAAGATCGGAAGAGCACACGTCTGAACTCCAGTCAC/3SpC3/	TCTACTGT
top-cs1-p7-Gbc3	/5phos/ ACACTGACGACATGGTTCTACAACAGAAGATCGGAAGAGCACACGTCTGAACTCCAGTCAC/3SpC3/	TCTGTTGT
top-cs1-p7-Gbc4	/5phos/ ACACTGACGACATGGTTCTACACGTTAAGATCGGAAGAGCACACGTCTGAACTCCAGTCAC/3SpC3/	TAACGTGT
top-cs1-p7-Gbc5	/5phos/ ACACTGACGACATGGTTCTACACCATGAGATCGGAAGAGCACACGTCTGAACTCCAGTCAC/3SpC3/	CATGGTGT
top-cs1-p7-Gbc6	/5phos/ ACACTGACGACATGGTTCTACAACTCTAGATCGGAAGAGCACACGTCTGAACTCCAGTCAC/3SpC3/	AGAGTTGT
top-cs1-p7-Gbc7	/5phos/ ACACTGACGACATGGTTCTACACCTTAAGATCGGAAGAGCACACGTCTGAACTCCAGTCAC/3SpC3/	TAAGGTGT
top-cs1-p7-Gbc8	/5phos/ ACACTGACGACATGGTTCTACAGCCATAGATCGGAAGAGCACACGTCTGAACTCCAGTCAC/3SpC3/	ATGGCTGT
top-cs1-p7-Gbc9	/5phos/ ACACTGACGACATGGTTCTACAGTGTAAGATCGGAAGAGCACACGTCTGAACTCCAGTCAC/3SpC3/	TACACTGT
top-cs1-p7-Gbc10	/5phos/ ACACTGACGACATGGTTCTACACATTGAGATCGGAAGAGCACACGTCTGAACTCCAGTCAC/3SpC3/	CAATGTGT
top-cs1-p7-Gbc11	/5phos/ ACACTGACGACATGGTTCTACAATATCAGATCGGAAGAGCACACGTCTGAACTCCAGTCAC/3SpC3/	GATATTGT
top-cs1-p7-Gbc12	/5phos/ ACACTGACGACATGGTTCTACAGTCATAGATCGGAAGAGCACACGTCTGAACTCCAGTCAC/3SpC3/	ATGACTGT
top-cs1-p7-Gbc13	/5phos/ ACACTGACGACATGGTTCTACACTTAGAGATCGGAAGAGCACACGTCTGAACTCCAGTCAC/3SpC3/	CTAAGTGT
top-cs1-p7-Gbc14	/5phos/ ACACTGACGACATGGTTCTACATGAGGAGATCGGAAGAGCACACGTCTGAACTCCAGTCAC/3SpC3/	CCTCATGT
top-cs1-p7-Gbc15	/5phos/ ACACTGACGACATGGTTCTACACAGTCAGATCGGAAGAGCACACGTCTGAACTCCAGTCAC/3SpC3/	GACTGTGT
top-cs1-p7-Gbc16	/5phos/ ACACTGACGACATGGTTCTACAGCAGGAAGATCGGAAGAGCACACGTCTGAACTCCAGTCAC/3SpC3/	TCCTGCTG
top-cs1-p7-Gbc17	/5phos/ ACACTGACGACATGGTTCTACATTCTCGAGATCGGAAGAGCACACGTCTGAACTCCAGTCAC/3SpC3/	CGAGAATG
top-cs1-p7-Gbc18	/5phos/ ACACTGACGACATGGTTCTACAACGAAGAGATCGGAAGAGCACACGTCTGAACTCCAGTCAC/3SpC3/	CTTCGTTG
top-cs1-p7-Gbc19	/5phos/ ACACTGACGACATGGTTCTACAGAACTAAGATCGGAAGAGCACACGTCTGAACTCCAGTCAC/3SpC3/	TAGTTCTG
top-cs1-p7-Gbc20	/5phos/ ACACTGACGACATGGTTCTACATCAGATAGATCGGAAGAGCACACGTCTGAACTCCAGTCAC/3SpC3/	ATCTGATG
top-cs1-p7-Gbc21	/5phos/ ACACTGACGACATGGTTCTACAAGAGTGAGATCGGAAGAGCACACGTCTGAACTCCAGTCAC/3SpC3/	CACTCTTG
top-cs1-p7-Gbc22	/5phos/ ACACTGACGACATGGTTCTACATGCAGTAGATCGGAAGAGCACACGTCTGAACTCCAGTCAC/3SpC3/	ACTGCATG
top-cs1-p7-Gbc23	/5phos/ ACACTGACGACATGGTTCTACAGTCCATAGATCGGAAGAGCACACGTCTGAACTCCAGTCAC/3SpC3/	ATGGACTG
top-cs1-p7-Gbc24	/5phos/ ACACTGACGACATGGTTCTACAACTTGAAGATCGGAAGAGCACACGTCTGAACTCCAGTCAC/3SpC3/	TCAAGTTG
top-cs1-p7-Gbc25	/5phos/ ACACTGACGACATGGTTCTACACACATGAGATCGGAAGAGCACACGTCTGAACTCCAGTCAC/3SpC3/	CATGTGTG
top-cs1-p7-Gbc26	/5phos/ ACACTGACGACATGGTTCTACATCACTGAGATCGGAAGAGCACACGTCTGAACTCCAGTCAC/3SpC3/	CAGTGATG
top-cs1-p7-Gbc27	/5phos/ ACACTGACGACATGGTTCTACAACTGTGAGATCGGAAGAGCACACGTCTGAACTCCAGTCAC/3SpC3/	CACAGTTG
top-cs1-p7-Gbc28	/5phos/ ACACTGACGACATGGTTCTACATTGACCAGATCGGAAGAGCACACGTCTGAACTCCAGTCAC/3SpC3/	GGTCAATG
top-cs1-p7-Gbc29	/5phos/ ACACTGACGACATGGTTCTACACACTAGAGATCGGAAGAGCACACGTCTGAACTCCAGTCAC/3SpC3/	CTAGTGTG
top-cs1-p7-Gbc30	/5phos/ ACACTGACGACATGGTTCTACACGATGAAGATCGGAAGAGCACACGTCTGAACTCCAGTCAC/3SpC3/	TCATCGTG
top-cs1-p7-Gbc31	/5phos/ ACACTGACGACATGGTTCTACAACCTCTTAGATCGGAAGAGCACACGTCTGAACTCCAGTCAC/3SpC3/	AAGAGGTT
top-cs1-p7-Gbc32	/5phos/ ACACTGACGACATGGTTCTACAATACATGAGATCGGAAGAGCACACGTCTGAACTCCAGTCAC/3SpC3/	CATGTATT
top-cs1-p7-Gbc33	/5phos/ ACACTGACGACATGGTTCTACAAGGTCTCAGATCGGAAGAGCACACGTCTGAACTCCAGTCAC/3SpC3/	GAGACCTT
top-cs1-p7-Gbc34	/5phos/ ACACTGACGACATGGTTCTACAACTGCTAAGATCGGAAGAGCACACGTCTGAACTCCAGTCAC/3SpC3/	TAGCAGTT
top-cs1-p7-Gbc35	/5phos/ ACACTGACGACATGGTTCTACATCGGTACAGATCGGAAGAGCACACGTCTGAACTCCAGTCAC/3SpC3/	GTACCGAT
top-cs1-p7-Gbc36	/5phos/ ACACTGACGACATGGTTCTACATCGTGAAAGATCGGAAGAGCACACGTCTGAACTCCAGTCAC/3SpC3/	TTCACGAT
top-cs1-p7-Gbc37	/5phos/ ACACTGACGACATGGTTCTACACGAATTGAGATCGGAAGAGCACACGTCTGAACTCCAGTCAC/3SpC3/	CAATTCGT
top-cs1-p7-Gbc38	/5phos/ ACACTGACGACATGGTTCTACAAGTTATGAGATCGGAAGAGCACACGTCTGAACTCCAGTCAC/3SpC3/	CATAACTT
top-cs1-p7-Gbc39	/5phos/ ACACTGACGACATGGTTCTACACACTGTAAGATCGGAAGAGCACACGTCTGAACTCCAGTCAC/3SpC3/	TACAGTGT
top-cs1-p7-Gbc40	/5phos/ ACACTGACGACATGGTTCTACATATCTTGAGATCGGAAGAGCACACGTCTGAACTCCAGTCAC/3SpC3/	CAAGATAT
top-cs1-p7-Gbc41	/5phos/ ACACTGACGACATGGTTCTACATACCGGAAGATCGGAAGAGCACACGTCTGAACTCCAGTCAC/3SpC3/	TCCGGTAT
top-cs1-p7-Gbc42	/5phos/ ACACTGACGACATGGTTCTACAGATTCTTAGATCGGAAGAGCACACGTCTGAACTCCAGTCAC/3SpC3/	AAGAATCT
top-cs1-p7-Gbc43	/5phos/ ACACTGACGACATGGTTCTACACGCCAATAGATCGGAAGAGCACACGTCTGAACTCCAGTCAC/3SpC3/	ATTGGCGT
top-cs1-p7-Gbc44	/5phos/ ACACTGACGACATGGTTCTACACGTACGTAGATCGGAAGAGCACACGTCTGAACTCCAGTCAC/3SpC3/	ACGTACGT
top-cs1-p7-Gbc45	/5phos/ ACACTGACGACATGGTTCTACAATTACGCAGATCGGAAGAGCACACGTCTGAACTCCAGTCAC/3SpC3/	GCGTAATT
top-cs1-p7-Gbc46	/5phos/ ACACTGACGACATGGTTCTACAATCCGATTAGATCGGAAGAGCACACGTCTGAACTCCAGTCAC/3SpC3/	AATCGGAT
top-cs1-p7-Gbc47	/5phos/ ACACTGACGACATGGTTCTACATGTCTGCAAGATCGGAAGAGCACACGTCTGAACTCCAGTCAC/3SpC3/	TGCAGACA
top-cs1-p7-Gbc48	/5phos/ ACACTGACGACATGGTTCTACAGTATCTATAGATCGGAAGAGCACACGTCTGAACTCCAGTCAC/3SpC3/	ATAGATAC
top-cs1-p7-Gbc49	/5phos/ ACACTGACGACATGGTTCTACATCTACATGAGATCGGAAGAGCACACGTCTGAACTCCAGTCAC/3SpC3/	CATGTAGA
top-cs1-p7-Gbc50	/5phos/ ACACTGACGACATGGTTCTACAGGTCAACTAGATCGGAAGAGCACACGTCTGAACTCCAGTCAC/3SpC3/	AGTTGACC
top-cs1-p7-Gbc51	/5phos/ ACACTGACGACATGGTTCTACACGCTTAATAGATCGGAAGAGCACACGTCTGAACTCCAGTCAC/3SpC3/	ATTAAGCG
top-cs1-p7-Gbc52	/5phos/ ACACTGACGACATGGTTCTACAAAGCCATCAGATCGGAAGAGCACACGTCTGAACTCCAGTCAC/3SpC3/	GATGGCTT
top-cs1-p7-Gbc53	/5phos/ ACACTGACGACATGGTTCTACATAGGAGACAGATCGGAAGAGCACACGTCTGAACTCCAGTCAC/3SpC3/	GTCTCCTA
top-cs1-p7-Gbc54	/5phos/ ACACTGACGACATGGTTCTACATAATTACGAGATCGGAAGAGCACACGTCTGAACTCCAGTCAC/3SpC3/	CGTAATTA
top-cs1-p7-Gbc55	/5phos/ ACACTGACGACATGGTTCTACAATCGACGAAGATCGGAAGAGCACACGTCTGAACTCCAGTCAC/3SpC3/	TCGTCGAT
top-cs1-p7-Gbc56	/5phos/ ACACTGACGACATGGTTCTACAGAGTACGTAGATCGGAAGAGCACACGTCTGAACTCCAGTCAC/3SpC3/	ACGTACTC
top-cs1-p7-Gbc57	/5phos/ ACACTGACGACATGGTTCTACATGTAATCGAGATCGGAAGAGCACACGTCTGAACTCCAGTCAC/3SpC3/	CGATTACA
top-cs1-p7-Gbc58	/5phos/ ACACTGACGACATGGTTCTACAAGCATATGAGATCGGAAGAGCACACGTCTGAACTCCAGTCAC/3SpC3/	CATATGCT
top-cs1-p7-Gbc59	/5phos/ ACACTGACGACATGGTTCTACACAAGCTGAAGATCGGAAGAGCACACGTCTGAACTCCAGTCAC/3SpC3/	TCAGCTTG
top-cs1-p7-Gbc60	/5phos/ ACACTGACGACATGGTTCTACAGGATTGCTAGATCGGAAGAGCACACGTCTGAACTCCAGTCAC/3SpC3/	AGCAATCC
top-cs1-p7-Gbc61	/5phos/ ACACTGACGACATGGTTCTACATGGTTATCAGATCGGAAGAGCACACGTCTGAACTCCAGTCAC/3SpC3/	GATAACCA
top-cs1-p7-Gbc62	/5phos/ ACACTGACGACATGGTTCTACAGGTGTCATAGATCGGAAGAGCACACGTCTGAACTCCAGTCAC/3SpC3/	ATGACACC
top-cs1-p7-Gbc63	/5phos/ ACACTGACGACATGGTTCTACAAATCAGAGAGATCGGAAGAGCACACGTCTGAACTCCAGTCAC/3SpC3/	CTCTGATT
top-cs1-p7-Gbc64	/5phos/ ACACTGACGACATGGTTCTACATCTTAGTCAGATCGGAAGAGCACACGTCTGAACTCCAGTCAC/3SpC3/	GACTAAGA
top-cs1-p7-Gbc65	/5phos/ ACACTGACGACATGGTTCTACACTGATTCTAGATCGGAAGAGCACACGTCTGAACTCCAGTCAC/3SpC3/	AGAATCAG
top-cs1-p7-Gbc66	/5phos/ ACACTGACGACATGGTTCTACATCCGTCTAAGATCGGAAGAGCACACGTCTGAACTCCAGTCAC/3SpC3/	TAGACGGA
top-cs1-p7-Gbc67	/5phos/ ACACTGACGACATGGTTCTACAACGTTCACAGATCGGAAGAGCACACGTCTGAACTCCAGTCAC/3SpC3/	GTGAACGT
top-cs1-p7-Gbc68	/5phos/ ACACTGACGACATGGTTCTACATTCGCTCAAGATCGGAAGAGCACACGTCTGAACTCCAGTCAC/3SpC3/	TGAGCGAA
top-cs1-p7-Gbc69	/5phos/ ACACTGACGACATGGTTCTACATACTAAGCAGATCGGAAGAGCACACGTCTGAACTCCAGTCAC/3SpC3/	GCTTAGTA
top-cs1-p7-Gbc70	/5phos/ ACACTGACGACATGGTTCTACAGTGACTTGAGATCGGAAGAGCACACGTCTGAACTCCAGTCAC/3SpC3/	CAAGTCAC
top-cs1-p7-Gbc71	/5phos/ ACACTGACGACATGGTTCTACAAACGCGTAAGATCGGAAGAGCACACGTCTGAACTCCAGTCAC/3SpC3/	TACGCGTT
top-cs1-p7-Gbc72	/5phos/ ACACTGACGACATGGTTCTACACTTGGTTAAGATCGGAAGAGCACACGTCTGAACTCCAGTCAC/3SpC3/	TAACCAAG
top-cs1-p7-Gbc73	/5phos/ ACACTGACGACATGGTTCTACAGATTGCAGAGATCGGAAGAGCACACGTCTGAACTCCAGTCAC/3SpC3/	CTGCAATC
top-cs1-p7-Gbc74	/5phos/ ACACTGACGACATGGTTCTACAGATATAACAGATCGGAAGAGCACACGTCTGAACTCCAGTCAC/3SpC3/	GTTATATC
top-cs1-p7-Gbc75	/5phos/ ACACTGACGACATGGTTCTACACTACTAGGAGATCGGAAGAGCACACGTCTGAACTCCAGTCAC/3SpC3/	CCTAGTAG
top-cs1-p7-Gbc76	/5phos/ ACACTGACGACATGGTTCTACACATGTCCAAGATCGGAAGAGCACACGTCTGAACTCCAGTCAC/3SpC3/	TGGACATG
top-cs1-p7-Gbc77	/5phos/ ACACTGACGACATGGTTCTACATCGCATCAAGATCGGAAGAGCACACGTCTGAACTCCAGTCAC/3SpC3/	TGATGCGA
top-cs1-p7-Gbc78	/5phos/ ACACTGACGACATGGTTCTACAAGCAACCTAGATCGGAAGAGCACACGTCTGAACTCCAGTCAC/3SpC3/	AGGTTGCT
top-cs1-p7-Gbc79	/5phos/ ACACTGACGACATGGTTCTACAGATGATCCAGATCGGAAGAGCACACGTCTGAACTCCAGTCAC/3SpC3/	GGATCATC
top-cs1-p7-Gbc80	/5phos/ ACACTGACGACATGGTTCTACAAAGAGCTGAGATCGGAAGAGCACACGTCTGAACTCCAGTCAC/3SpC3/	CAGCTCTT
top-cs1-p7-Gbc81	/5phos/ ACACTGACGACATGGTTCTACATGGCAGTTAGATCGGAAGAGCACACGTCTGAACTCCAGTCAC/3SpC3/	AACTGCCA
top-cs1-p7-Gbc82	/5phos/ ACACTGACGACATGGTTCTACAGTAGTTCGAGATCGGAAGAGCACACGTCTGAACTCCAGTCAC/3SpC3/	CGAACTAC
top-cs1-p7-Gbc83	/5phos/ ACACTGACGACATGGTTCTACAAGTCGTATAGATCGGAAGAGCACACGTCTGAACTCCAGTCAC/3SpC3/	ATACGACT
top-cs1-p7-Gbc84	/5phos/ ACACTGACGACATGGTTCTACATTAATCGAAGATCGGAAGAGCACACGTCTGAACTCCAGTCAC/3SpC3/	TCGATTAA
top-cs1-p7-Gbc85	/5phos/ ACACTGACGACATGGTTCTACAGCTAACGAAGATCGGAAGAGCACACGTCTGAACTCCAGTCAC/3SpC3/	TCGTTAGC
top-cs1-p7-Gbc86	/5phos/ ACACTGACGACATGGTTCTACAATACGCCAAGATCGGAAGAGCACACGTCTGAACTCCAGTCAC/3SpC3/	TGGCGTAT
top-cs1-p7-Gbc87	/5phos/ ACACTGACGACATGGTTCTACAACGTGTGTAGATCGGAAGAGCACACGTCTGAACTCCAGTCAC/3SpC3/	ACACACGT
top-cs1-p7-Gbc88	/5phos/ ACACTGACGACATGGTTCTACAATGCTTAAAGATCGGAAGAGCACACGTCTGAACTCCAGTCAC/3SpC3/	TTAAGCAT
top-cs1-p7-Gbc89	/5phos/ ACACTGACGACATGGTTCTACATTAACGTCAGATCGGAAGAGCACACGTCTGAACTCCAGTCAC/3SpC3/	GACGTTAA
top-cs1-p7-Gbc90	/5phos/ ACACTGACGACATGGTTCTACATCAAGCCTAGATCGGAAGAGCACACGTCTGAACTCCAGTCAC/3SpC3/	AGGCTTGA
top-cs1-p7-Gbc91	/5phos/ ACACTGACGACATGGTTCTACAAACGTCAGAGATCGGAAGAGCACACGTCTGAACTCCAGTCAC/3SpC3/	CTGACGTT
top-cs1-p7-Gbc92	/5phos/ ACACTGACGACATGGTTCTACACTAGTGAAAGATCGGAAGAGCACACGTCTGAACTCCAGTCAC/3SpC3/	TTCACTAG
top-cs1-p7-Gbc93	/5phos/ ACACTGACGACATGGTTCTACACAGCATATAGATCGGAAGAGCACACGTCTGAACTCCAGTCAC/3SpC3/	ATATGCTG
top-cs1-p7-Gbc94	/5phos/ ACACTGACGACATGGTTCTACATGACCTTGAGATCGGAAGAGCACACGTCTGAACTCCAGTCAC/3SpC3/	CAAGGTCA
top-cs1-p7-Gbc95	/5phos/ ACACTGACGACATGGTTCTACATATCGCTCAGATCGGAAGAGCACACGTCTGAACTCCAGTCAC/3SpC3/	GAGCGATA
top-cs1-p7-Gbc96	/5phos/ ACACTGACGACATGGTTCTACACTGTCATTAGATCGGAAGAGCACACGTCTGAACTCCAGTCAC/3SpC3/	AATGACAG
Bot p7 rcCS1-comm	TGTAGAACCATGTCGTCAGTGTC CCC CCC C/3ddC/
