# Supplementary material for: Profiling single-cell histone modifications using indexing chromatin immunocleavage sequencing
Source: HighWire-hosted journal article supplement (doi:10.1101/gr.260893.120), 2021-04-14
Supplement: Supplemental_Table_S3.xlsx [file Supplemental_Table_S3.xlsx]

## Sheet: scH3K4me3 480 wells
Table S3. The mapping statistics of the libraries of iscChIC-seq libraries.
	total reads	mapped reads	mappabiity
GB930101_S1	996355	762226	0.765014
GB930102_S2	1074892	784562	0.729898
GB930103_S3	1232408	952613	0.772969
GB930104_S4	671272	407621	0.607237
GB930105_S5	1342310	788488	0.587411
GB930106_S6	1419940	1083920	0.763356
GB930107_S7	949066	677265	0.713612
GB930108_S8	1342509	1000409	0.745179
GB930109_S9	1607332	1055690	0.656796
GB930110_S10	1180259	916611	0.776619
GB930111_S11	1176234	825823	0.702091
GB930112_S12	1169353	896942	0.767041
GB930113_S13	1308383	1001715	0.765613
GB930114_S14	1018557	738276	0.724825
GB930115_S15	1795978	1309156	0.728938
GB930116_S16	1284409	996972	0.776211
GB930117_S17	1370206	1051292	0.767251
GB930118_S18	1089314	825564	0.757875
GB930119_S19	1338500	971373	0.725718
GB930120_S20	1560833	1187620	0.760889
GB930121_S21	910882	681865	0.748577
GB930122_S22	1123059	848025	0.755103
GB930123_S23	956551	717440	0.750028
GB930124_S24	947141	663555	0.700587
GB930125_S25	1103149	734844	0.666133
GB930126_S26	1071362	725189	0.676885
GB930127_S27	910209	677144	0.743943
GB930128_S28	1026744	763778	0.743884
GB930129_S29	1302565	995082	0.76394
GB930130_S30	1230908	932236	0.757356
GB930131_S31	1036267	812142	0.783719
GB930132_S32	1314628	980568	0.74589
GB930133_S33	1612305	1241926	0.77028
GB930134_S34	1188391	874269	0.735675
GB930135_S35	786921	596088	0.757494
GB930136_S36	1576763	1196382	0.758758
GB930137_S37	2329	646	0.277372
GB930138_S38	2135	471	0.220609
GB930139_S39	2726	707	0.259354
GB930140_S40	2624	592	0.22561
GB930141_S41	764651	504364	0.6596
GB930142_S42	588	141	0.239796
GB930143_S43	622	105	0.16881
GB930144_S44	1498551	959244	0.640114
GB930145_S45	2100	1080	0.514286
GB930146_S46	602	248	0.41196
GB930147_S47	1058	229	0.216446
GB930148_S48	209	47	0.22488
GB930149_S49	1003685	682383	0.679878
GB930150_S50	1124821	878033	0.780598
GB930151_S51	974206	714846	0.733773
GB930152_S52	1208516	679023	0.561865
GB930153_S53	1376753	914060	0.663924
GB930154_S54	727886	546668	0.751035
GB930155_S55	1167973	711211	0.608928
GB930156_S56	942413	600758	0.637468
GB930157_S57	1232622	961969	0.780425
GB930158_S58	1172596	803096	0.684887
GB930159_S59	661144	478398	0.723591
GB930160_S60	945406	719287	0.760823
GB930161_S61	866179	598176	0.690592
GB930162_S62	925427	688213	0.743671
GB930163_S63	876365	643925	0.734768
GB930164_S64	738028	531164	0.719707
GB930165_S65	892127	643165	0.720934
GB930166_S66	812046	587867	0.723933
GB930167_S67	1087477	707938	0.650991
GB930168_S68	847100	455175	0.537333
GB930169_S69	1460368	1136672	0.778346
GB930170_S70	1165284	824487	0.707542
GB930171_S71	961570	730475	0.759669
GB930172_S72	574246	371221	0.646449
GB930173_S73	1017903	741990	0.72894
GB930174_S74	1057077	670652	0.63444
GB930175_S75	795996	590586	0.741946
GB930176_S76	1238667	888746	0.717502
GB930177_S77	849183	514700	0.606112
GB930178_S78	915203	595016	0.650146
GB930179_S79	887913	505238	0.569017
GB930180_S80	843561	563617	0.66814
GB930181_S81	1059144	693704	0.654967
GB930182_S82	855914	626705	0.732206
GB930183_S83	1025042	738940	0.720888
GB930184_S84	921848	658615	0.714451
GB930185_S85	1188540	902180	0.759066
GB930186_S86	1058832	635315	0.600015
GB930187_S87	943410	668010	0.70808
GB930188_S88	1060128	804886	0.759235
GB930189_S89	879243	601641	0.684272
GB930190_S90	847078	632090	0.7462
GB930191_S91	801010	594617	0.742334
GB930192_S92	1168501	740218	0.633477
GB930193_S93	953358	718371	0.753517
GB930194_S94	700938	510747	0.728662
GB930195_S95	1258083	965599	0.767516
GB930196_S96	807077	566912	0.702426
GB930201_S97	1718586	1392800	0.810434
GB930202_S98	2324222	1740163	0.748708
GB930203_S99	1361272	1101246	0.808983
GB930204_S100	1699200	1331395	0.783542
GB930205_S101	1678447	1225398	0.730078
GB930206_S102	1580444	1275396	0.806986
GB930207_S103	1823375	1483741	0.813733
GB930208_S104	2004041	1663204	0.829925
GB930209_S105	1558366	1165185	0.747697
GB930210_S106	1463594	1184276	0.809156
GB930211_S107	1866751	1501793	0.804496
GB930212_S108	1482991	1108018	0.747151
GB930213_S109	1612206	1293631	0.802398
GB930214_S110	1900106	1553997	0.817848
GB930215_S111	1477232	1156277	0.782732
GB930216_S112	2225473	1847188	0.83002
GB930217_S113	1309167	1048411	0.800823
GB930218_S114	2226159	1824763	0.819691
GB930219_S115	1544552	1244076	0.805461
GB930220_S116	2105697	1712858	0.81344
GB930221_S117	1281991	1034333	0.806818
GB930222_S118	1881844	1547193	0.822169
GB930223_S119	1176949	940193	0.798839
GB930224_S120	1506779	1210820	0.803582
GB930225_S121	1424679	1111119	0.779908
GB930226_S122	1774486	1419866	0.800156
GB930227_S123	1086683	866142	0.797051
GB930228_S124	1478951	1208608	0.817206
GB930229_S125	2041445	1680721	0.8233
GB930230_S126	1768958	1448970	0.819109
GB930231_S127	1649023	1365415	0.828015
GB930232_S128	1796563	1450359	0.807296
GB930233_S129	1179474	924317	0.783669
GB930234_S130	2465632	1873529	0.759858
GB930235_S131	1070521	876691	0.818939
GB930236_S132	2203423	1803831	0.818649
GB930237_S133	1624	1083	0.666872
GB930238_S134	1778	386	0.217098
GB930239_S135	2008	835	0.415837
GB930240_S136	809	437	0.540173
GB930241_S137	1682028	1364607	0.811287
GB930242_S138	210	115	0.547619
GB930243_S139	465	180	0.387097
GB930244_S140	2668436	2056833	0.770801
GB930245_S141	2394	1462	0.610693
GB930246_S142	838	577	0.688544
GB930247_S143	672	333	0.495536
GB930248_S144	148	58	0.391892
GB930249_S145	1730713	1382420	0.798758
GB930250_S146	2006827	1656932	0.825648
GB930251_S147	1201515	963543	0.80194
GB930252_S148	2079200	1551725	0.746309
GB930253_S149	1817095	1449430	0.797663
GB930254_S150	935473	760874	0.813358
GB930255_S151	1384521	1005735	0.726414
GB930256_S152	1518874	1176672	0.7747
GB930257_S153	1296717	1050418	0.81006
GB930258_S154	1004067	695867	0.693048
GB930259_S155	1617427	1336219	0.826139
GB930260_S156	1355707	1110671	0.819256
GB930261_S157	1510148	1200799	0.795153
GB930262_S158	1838535	1519802	0.826638
GB930263_S159	1911138	1567528	0.820207
GB930264_S160	1350763	1099800	0.814206
GB930265_S161	1091895	850162	0.778611
GB930266_S162	1319988	1069918	0.810551
GB930267_S163	1579879	1219672	0.772003
GB930268_S164	1537617	1164591	0.7574
GB930269_S165	1497690	1208222	0.806724
GB930270_S166	2337046	1906965	0.815972
GB930271_S167	1392430	1110882	0.797801
GB930272_S168	1179427	923602	0.783094
GB930273_S169	1241424	984258	0.792846
GB930274_S170	1469501	1133290	0.771207
GB930275_S171	1654551	1364365	0.824613
GB930276_S172	1038235	756672	0.728806
GB930277_S173	1348203	1058108	0.784828
GB930278_S174	1844538	1372954	0.744335
GB930279_S175	1193456	928419	0.777925
GB930280_S176	1108311	825469	0.744799
GB930281_S177	1484957	1145489	0.771395
GB930282_S178	1603568	1317198	0.821417
GB930283_S179	1591815	1114934	0.700417
GB930284_S180	1305147	1032189	0.79086
GB930285_S181	1758469	1372701	0.780623
GB930286_S182	1386555	1023800	0.738377
GB930287_S183	1390825	1100912	0.791553
GB930288_S184	2044392	1696114	0.829642
GB930289_S185	1472639	1172910	0.796468
GB930290_S186	1504910	1219478	0.810333
GB930291_S187	1255596	1026536	0.817569
GB930292_S188	1747812	1309964	0.749488
GB930293_S189	1941692	1596734	0.822342
GB930294_S190	1774931	1449093	0.816422
GB930295_S191	1719421	1413478	0.822066
GB930296_S192	1201495	942187	0.784179
GB930301_S193	970724	784686	0.808351
GB930302_S194	1569573	1291849	0.823058
GB930303_S195	1416995	1164137	0.821553
GB930304_S196	1881683	1518591	0.807039
GB930305_S197	1509547	1048503	0.694581
GB930306_S198	1343666	973687	0.72465
GB930307_S199	1368208	1081128	0.790178
GB930308_S200	1148454	922496	0.80325
GB930309_S201	1363166	995878	0.730563
GB930310_S202	1310723	1076867	0.821582
GB930311_S203	1416335	1106888	0.781516
GB930312_S204	1255825	1014172	0.807574
GB930313_S205	1549216	1243544	0.802692
GB930314_S206	1425630	1147519	0.804921
GB930315_S207	1180144	905619	0.76738
GB930316_S208	1708981	1409228	0.824601
GB930317_S209	1518253	1234180	0.812895
GB930318_S210	1808029	1497032	0.827991
GB930319_S211	1862237	1555748	0.835419
GB930320_S212	1617785	1301226	0.804326
GB930321_S213	1353522	1100602	0.813139
GB930322_S214	1353955	1091313	0.806019
GB930323_S215	1338196	1088517	0.813421
GB930324_S216	1389624	1096269	0.788896
GB930325_S217	1457392	1118422	0.767413
GB930326_S218	1541030	1217714	0.790195
GB930327_S219	1739682	1437735	0.826436
GB930328_S220	1158385	931717	0.804324
GB930329_S221	1432882	1158975	0.808842
GB930330_S222	1446043	1166529	0.806704
GB930331_S223	1163378	958584	0.823966
GB930332_S224	1741466	1419373	0.815045
GB930333_S225	1255393	996775	0.793994
GB930334_S226	1274441	998765	0.783689
GB930335_S227	1109906	903337	0.813886
GB930336_S228	1273310	994330	0.780902
GB930337_S229	1788	1027	0.574385
GB930338_S230	1616	344	0.212871
GB930339_S231	2222	730	0.328533
GB930340_S232	644	261	0.40528
GB930341_S233	898695	683529	0.76058
GB930342_S1	387	155	0.400517
GB930343_S2	271	93	0.343173
GB930344_S3	1445989	1027924	0.71088
GB930345_S4	1942	1216	0.626159
GB930346_S5	565	341	0.60354
GB930347_S6	513	238	0.463938
GB930348_S7	119	43	0.361345
GB930349_S8	1145224	879337	0.76783
GB930350_S9	1282413	1053062	0.821157
GB930351_S10	1193671	963222	0.806941
GB930352_S11	1405456	979595	0.696994
GB930353_S12	1495894	1148066	0.767478
GB930354_S13	1132726	930741	0.821682
GB930355_S14	1515125	1139225	0.751902
GB930356_S15	1468964	1132993	0.771287
GB930357_S16	1279189	1037090	0.81074
GB930358_S17	1318167	1096195	0.831606
GB930359_S18	1193237	964410	0.80823
GB930360_S19	1235965	1013608	0.820094
GB930361_S20	1477617	1189111	0.804749
GB930362_S21	1729195	1433290	0.828877
GB930363_S22	1544536	1253308	0.811446
GB930364_S23	1083637	864786	0.79804
GB930365_S24	993108	776701	0.782091
GB930366_S25	1010682	799316	0.790868
GB930367_S26	1528928	1177031	0.769841
GB930368_S27	1147348	825694	0.719654
GB930369_S28	1356862	1112916	0.820213
GB930370_S29	908002	696573	0.767149
GB930371_S30	1234209	1000508	0.810647
GB930372_S31	792151	600284	0.75779
GB930373_S32	1096967	866803	0.790181
GB930374_S33	1235373	920375	0.745018
GB930375_S34	1257918	1022343	0.812726
GB930376_S35	873430	601647	0.688833
GB930377_S36	1810832	1319145	0.728475
GB930378_S37	1085481	826056	0.761005
GB930379_S38	1121941	864334	0.770392
GB930380_S39	1060591	839327	0.791377
GB930381_S40	1446498	1087321	0.751692
GB930382_S41	1339443	1091890	0.815182
GB930383_S42	1023953	728905	0.711854
GB930384_S43	1619625	1137216	0.702148
GB930385_S44	1146990	915605	0.798268
GB930386_S45	1418679	1034897	0.729479
GB930387_S46	939203	714076	0.7603
GB930388_S47	1133781	919067	0.810621
GB930389_S48	1414870	1131179	0.799493
GB930390_S49	1155260	923635	0.799504
GB930391_S50	1238236	1012566	0.817749
GB930392_S51	1333891	983447	0.737277
GB930393_S52	1101021	883743	0.802658
GB930394_S53	1275257	1044924	0.819383
GB930395_S54	1585494	1307084	0.824402
GB930396_S55	1107727	858466	0.77498
GB930401_S56	1169745	929842	0.79491
GB930402_S57	1215138	947494	0.779742
GB930403_S58	1086763	827231	0.761188
GB930404_S59	1296004	941209	0.726239
GB930405_S60	1605056	892493	0.556051
GB930406_S61	995541	717095	0.720307
GB930407_S62	1063752	750308	0.705341
GB930408_S63	1304531	992089	0.760495
GB930409_S64	1841723	1226809	0.66612
GB930410_S65	1137154	899701	0.791187
GB930411_S66	1213728	869615	0.716483
GB930412_S67	1186024	932450	0.786198
GB930413_S68	1290716	686015	0.5315
GB930414_S69	1459233	1096827	0.751646
GB930415_S70	1203615	828718	0.688524
GB930416_S71	1301865	944501	0.725498
GB930417_S72	979690	716578	0.731433
GB930418_S73	877909	631190	0.71897
GB930419_S74	1264124	983221	0.777788
GB930420_S75	819896	553377	0.674936
GB930421_S76	1261441	979766	0.776704
GB930422_S77	1017464	747954	0.735116
GB930423_S78	1082652	823103	0.760266
GB930424_S79	1130511	802225	0.709613
GB930425_S80	1269454	810643	0.638576
GB930426_S81	1015621	666909	0.656651
GB930427_S82	1062870	805566	0.757916
GB930428_S83	1408710	1101487	0.781912
GB930429_S84	1486135	1147212	0.771943
GB930430_S85	1745358	1360704	0.779613
GB930431_S86	1143392	888177	0.776791
GB930432_S87	1443432	1087695	0.753548
GB930433_S88	1150262	855569	0.743804
GB930434_S89	1235679	899681	0.728086
GB930435_S90	641982	477917	0.74444
GB930436_S91	1574647	1193941	0.758228
GB930437_S92	1644	647	0.393552
GB930438_S93	2361	495	0.209657
GB930439_S94	3201	941	0.293971
GB930440_S95	1044	341	0.326628
GB930441_S96	973595	709668	0.728915
GB930442_S97	903	378	0.418605
GB930443_S98	644	160	0.248447
GB930444_S99	1455540	867180	0.595779
GB930445_S100	1965	946	0.481425
GB930446_S101	632	273	0.431962
GB930447_S102	694	228	0.32853
GB930448_S103	273	67	0.245421
GB930449_S104	975822	638223	0.654036
GB930450_S105	1198293	952135	0.794576
GB930451_S106	730746	522437	0.714937
GB930452_S107	1282859	648734	0.505694
GB930453_S108	1129890	762056	0.674451
GB930454_S109	924846	727364	0.78647
GB930455_S110	1029934	550831	0.534822
GB930456_S111	1108286	699550	0.6312
GB930457_S112	723733	521856	0.721061
GB930458_S113	825028	626916	0.759872
GB930459_S114	1052525	806146	0.765916
GB930460_S115	889313	690520	0.776465
GB930461_S116	1054972	707184	0.670334
GB930462_S117	1082789	826241	0.763067
GB930463_S118	1184399	808931	0.682989
GB930464_S119	961975	708605	0.736615
GB930465_S120	860480	585934	0.680939
GB930466_S121	691230	476778	0.689753
GB930467_S122	1193092	766343	0.642317
GB930468_S123	1319930	821709	0.62254
GB930469_S124	968488	740954	0.765063
GB930470_S125	871026	577855	0.663419
GB930471_S126	993045	752798	0.75807
GB930472_S127	847112	578008	0.682328
GB930473_S128	993399	719054	0.723832
GB930474_S129	968429	569309	0.587869
GB930475_S130	938329	697972	0.743846
GB930476_S131	946566	604451	0.638572
GB930477_S132	1312784	951194	0.724562
GB930478_S133	1338550	958428	0.71602
GB930479_S134	819701	540801	0.659754
GB930480_S135	859197	628597	0.73161
GB930481_S136	1274536	781817	0.613413
GB930482_S137	720875	511962	0.710195
GB930483_S138	1011175	720983	0.713015
GB930484_S139	916792	630135	0.687326
GB930485_S140	1472602	884238	0.60046
GB930486_S141	1351169	811365	0.600491
GB930487_S142	1152433	826444	0.71713
GB930488_S143	1059275	765051	0.72224
GB930489_S144	882175	563400	0.638649
GB930490_S145	1107483	836330	0.755163
GB930491_S146	657503	478313	0.727469
GB930492_S147	1392776	818172	0.58744
GB930493_S148	1193044	929702	0.779269
GB930494_S149	1008013	775892	0.769724
GB930495_S150	984541	736632	0.748198
GB930496_S151	999108	713428	0.714065
GB930501_S152	970854	799995	0.824012
GB930502_S153	1651615	1372126	0.830778
GB930503_S154	1282750	1048315	0.81724
GB930504_S155	1166671	912886	0.782471
GB930505_S156	1536689	1099553	0.715534
GB930506_S157	1208799	958828	0.793207
GB930507_S158	1872574	1540602	0.822719
GB930508_S159	1373298	1131673	0.824055
GB930509_S160	1164866	795680	0.683066
GB930510_S161	724426	591749	0.816852
GB930511_S162	1854133	1400946	0.75558
GB930512_S163	920193	747699	0.812546
GB930513_S164	1369113	1094948	0.79975
GB930514_S165	1652944	1344566	0.813437
GB930515_S166	1563343	1241410	0.794074
GB930516_S167	1288102	1045509	0.811666
GB930517_S168	1318865	1068249	0.809976
GB930518_S169	1885033	1565265	0.830365
GB930519_S170	1395764	1158007	0.829658
GB930520_S171	1460112	1188226	0.813791
GB930521_S172	1291648	1059024	0.819901
GB930522_S173	1661880	1359383	0.817979
GB930523_S174	1182471	957120	0.809424
GB930524_S175	1398222	1129088	0.807517
GB930525_S176	1368121	1065519	0.778819
GB930526_S177	1272152	996703	0.783478
GB930527_S178	1175082	950258	0.808674
GB930528_S179	1296690	1059777	0.817294
GB930529_S180	1563568	1283133	0.820644
GB930530_S181	1116211	896103	0.802808
GB930531_S182	1111212	907814	0.816958
GB930532_S183	2040333	1672382	0.819661
GB930533_S184	1802240	1440438	0.799249
GB930534_S185	995048	777211	0.781079
GB930535_S186	948801	773463	0.8152
GB930536_S187	1931972	1587088	0.821486
GB930537_S188	1821	1110	0.609555
GB930538_S189	1980	539	0.272222
GB930539_S190	3141	1289	0.410379
GB930540_S191	698	359	0.514327
GB930541_S192	1042590	821086	0.787544
GB930542_S193	223	115	0.515695
GB930543_S194	269	108	0.401487
GB930544_S195	1668816	1233019	0.738859
GB930545_S196	1772	1120	0.632054
GB930546_S197	590	367	0.622034
GB930547_S198	553	274	0.495479
GB930548_S199	116	43	0.37069
GB930549_S200	1043120	794852	0.761995
GB930550_S201	1488853	1231427	0.827098
GB930551_S202	1331431	1079711	0.81094
GB930552_S203	1457110	1009117	0.692547
GB930553_S204	1561763	1244346	0.796757
GB930554_S205	917172	753586	0.821641
GB930555_S206	1033298	712139	0.68919
GB930556_S207	1385387	1057968	0.763662
GB930557_S208	1166247	947051	0.81205
GB930558_S209	927137	755715	0.815106
GB930559_S210	1389892	1155661	0.831475
GB930560_S211	1110566	916669	0.825407
GB930561_S212	1198017	944072	0.788029
GB930562_S213	1515070	1204072	0.79473
GB930563_S214	1432825	1164060	0.812423
GB930564_S215	1200191	964035	0.803235
GB930565_S216	1181208	940332	0.796077
GB930566_S217	899203	711184	0.790905
GB930567_S218	1532374	1200314	0.783304
GB930568_S219	1012079	727488	0.718806
GB930569_S220	1551466	1256162	0.809661
GB930570_S221	1195561	959677	0.8027
GB930571_S222	1098787	887706	0.807896
GB930572_S223	921464	725537	0.787374
GB930573_S224	983662	761626	0.774276
GB930574_S225	1652265	1302391	0.788246
GB930575_S226	1123536	909008	0.80906
GB930576_S227	1093475	819035	0.74902
GB930577_S228	1471415	1182763	0.803827
GB930578_S229	1463886	1159559	0.79211
GB930579_S230	1081445	834835	0.771963
GB930580_S231	1429312	1172760	0.820507
GB930581_S232	1134198	852904	0.751989
GB930582_S233	1255546	1024603	0.816062
GB930583_S234	1013040	750448	0.740788
GB930584_S235	1096601	862340	0.786375
GB930585_S236	1668914	1384397	0.82952
GB930586_S237	1281348	948571	0.740291
GB930587_S238	1002521	782775	0.780807
GB930588_S239	1279500	1053338	0.823242
GB930589_S240	1104851	873768	0.790847
GB930590_S241	1340493	1108320	0.8268
GB930591_S242	1058920	857771	0.810043
GB930592_S243	1436742	1085537	0.755555
GB930593_S244	1902247	1571430	0.826091
GB930594_S245	1395594	1150046	0.824055
GB930595_S246	1450504	1192641	0.822225
GB930596_S247	1219190	982227	0.805639
Average	1.15101e+06	880471	0.72222

## Sheet: scH3K4me3 single cells
single cell library info	mapped reads	unique reads	redundancy
./GB930101_S1/AATGACAG_readname.txt.R1.bed.hg18	5287	2168	0.589938
./GB930101_S1/ACACACGT_readname.txt.R1.bed.hg18	5467	2375	0.565575
./GB930101_S1/AGGCTTGA_readname.txt.R1.bed.hg18	18878	6570	0.651976
./GB930101_S1/AGTTGACC_readname.txt.R1.bed.hg18	27659	9905	0.641889
./GB930101_S1/ATCTGATG_readname.txt.R1.bed.hg18	27561	9200	0.666195
./GB930101_S1/ATTGGCGT_readname.txt.R1.bed.hg18	7785	2881	0.629929
./GB930101_S1/CAAGATAT_readname.txt.R1.bed.hg18	25058	8717	0.652127
./GB930101_S1/CAAGGTCA_readname.txt.R1.bed.hg18	25100	8870	0.646614
./GB930101_S1/CAAGTCAC_readname.txt.R1.bed.hg18	87717	30787	0.649019
./GB930101_S1/CAATGTGT_readname.txt.R1.bed.hg18	3517	1512	0.570088
./GB930101_S1/CAGCTCTT_readname.txt.R1.bed.hg18	22852	8371	0.633686
./GB930101_S1/CATGTATT_readname.txt.R1.bed.hg18	21164	7123	0.663438
./GB930101_S1/CATGTGTG_readname.txt.R1.bed.hg18	8906	3224	0.637997
./GB930101_S1/CGATTACA_readname.txt.R1.bed.hg18	28290	9563	0.661965
./GB930101_S1/GACGTTAA_readname.txt.R1.bed.hg18	13116	4419	0.663083
./GB930101_S1/GATGGCTT_readname.txt.R1.bed.hg18	44437	14970	0.663119
./GB930101_S1/GTCTCCTA_readname.txt.R1.bed.hg18	58608	21616	0.631177
./GB930101_S1/GTGAACGT_readname.txt.R1.bed.hg18	68966	23632	0.657338
./GB930101_S1/TACAGTGT_readname.txt.R1.bed.hg18	7467	2829	0.621133
./GB930101_S1/TAGACGGA_readname.txt.R1.bed.hg18	50737	17274	0.659538
./GB930101_S1/TCAAGTTG_readname.txt.R1.bed.hg18	10100	3789	0.624851
./GB930101_S1/TGCAGACA_readname.txt.R1.bed.hg18	28415	9371	0.670209
./GB930101_S1/TGGACATG_readname.txt.R1.bed.hg18	32834	11731	0.642718
./GB930102_S2/AAGAATCT_readname.txt.R1.bed.hg18	6385	2277	0.643383
./GB930102_S2/AATGACAG_readname.txt.R1.bed.hg18	44261	14822	0.665123
./GB930102_S2/ACGTACTC_readname.txt.R1.bed.hg18	25423	8507	0.665382
./GB930102_S2/ATCTGATG_readname.txt.R1.bed.hg18	15701	5405	0.655754
./GB930102_S2/CAAGTCAC_readname.txt.R1.bed.hg18	45512	14842	0.673888
./GB930102_S2/CACTCTTG_readname.txt.R1.bed.hg18	24112	8102	0.663985
./GB930102_S2/CATAACTT_readname.txt.R1.bed.hg18	14426	4967	0.655691
./GB930102_S2/CATATGCT_readname.txt.R1.bed.hg18	20774	12086	0.418215
./GB930102_S2/CGAGAATG_readname.txt.R1.bed.hg18	67765	23727	0.649863
./GB930102_S2/GAGACCTT_readname.txt.R1.bed.hg18	7053	2508	0.644407
./GB930102_S2/GATAACCA_readname.txt.R1.bed.hg18	1846	1684	0.0877573
./GB930102_S2/GATATTGT_readname.txt.R1.bed.hg18	11899	4199	0.647113
./GB930102_S2/GGATCATC_readname.txt.R1.bed.hg18	6257	2469	0.605402
./GB930102_S2/GTACCGAT_readname.txt.R1.bed.hg18	15075	5093	0.662156
./GB930102_S2/GTGAACGT_readname.txt.R1.bed.hg18	23278	7875	0.661698
./GB930102_S2/TCAAGTTG_readname.txt.R1.bed.hg18	81783	26938	0.670616
./GB930102_S2/TCAGCTTG_readname.txt.R1.bed.hg18	51879	18249	0.648239
./GB930102_S2/TCCGGTAT_readname.txt.R1.bed.hg18	73218	24860	0.660466
./GB930102_S2/TCCTGCTG_readname.txt.R1.bed.hg18	11422	3962	0.653126
./GB930102_S2/TCGTCGAT_readname.txt.R1.bed.hg18	54846	18331	0.665773
./GB930102_S2/TCTACTGT_readname.txt.R1.bed.hg18	31239	10725	0.656679
./GB930103_S3/AACTGCCA_readname.txt.R1.bed.hg18	15765	5661	0.640913
./GB930103_S3/ACGTACGT_readname.txt.R1.bed.hg18	14800	5300	0.641892
./GB930103_S3/CAATGTGT_readname.txt.R1.bed.hg18	23855	8391	0.64825
./GB930103_S3/CAATTCGT_readname.txt.R1.bed.hg18	9787	3627	0.629406
./GB930103_S3/CAGTGATG_readname.txt.R1.bed.hg18	57617	18856	0.672735
./GB930103_S3/CATGTATT_readname.txt.R1.bed.hg18	31937	11549	0.638382
./GB930103_S3/CCTCATGT_readname.txt.R1.bed.hg18	109296	37883	0.653391
./GB930103_S3/CGAACTAC_readname.txt.R1.bed.hg18	12481	4444	0.643939
./GB930103_S3/GACGTTAA_readname.txt.R1.bed.hg18	24244	7887	0.674682
./GB930103_S3/GAGACCTT_readname.txt.R1.bed.hg18	13957	5176	0.629147
./GB930103_S3/GATATTGT_readname.txt.R1.bed.hg18	19887	6980	0.649017
./GB930103_S3/GATGGCTT_readname.txt.R1.bed.hg18	11452	4295	0.624956
./GB930103_S3/GGTCAATG_readname.txt.R1.bed.hg18	11898	4186	0.648176
./GB930103_S3/GTCTCCTA_readname.txt.R1.bed.hg18	145361	50124	0.655176
./GB930103_S3/GTTATATC_readname.txt.R1.bed.hg18	16747	6389	0.618499
./GB930103_S3/TAAGGTGT_readname.txt.R1.bed.hg18	91272	32221	0.646978
./GB930103_S3/TACACTGT_readname.txt.R1.bed.hg18	6158	2327	0.622118
./GB930103_S3/TACAGTGT_readname.txt.R1.bed.hg18	16598	5843	0.64797
./GB930103_S3/TACGCGTT_readname.txt.R1.bed.hg18	25709	8643	0.663814
./GB930103_S3/TCGATTAA_readname.txt.R1.bed.hg18	11573	4110	0.644863
./GB930103_S3/TCTGTTGT_readname.txt.R1.bed.hg18	69941	24389	0.651292
./GB930103_S3/TGATGCGA_readname.txt.R1.bed.hg18	21879	7221	0.669957
./GB930103_S3/TGCAGACA_readname.txt.R1.bed.hg18	6674	2554	0.617321
./GB930103_S3/TTAAGCAT_readname.txt.R1.bed.hg18	8024	3136	0.609172
./GB930103_S3/TTCACGAT_readname.txt.R1.bed.hg18	9183	3472	0.62191
./GB930104_S4/ACGTACGT_readname.txt.R1.bed.hg18	4029	1671	0.585257
./GB930104_S4/ACTGCATG_readname.txt.R1.bed.hg18	15158	4908	0.676211
./GB930104_S4/AGGTTGCT_readname.txt.R1.bed.hg18	4538	1776	0.608638
./GB930104_S4/AGTTGACC_readname.txt.R1.bed.hg18	14448	4856	0.663898
./GB930104_S4/ATACGACT_readname.txt.R1.bed.hg18	25562	8781	0.656482
./GB930104_S4/ATATGCTG_readname.txt.R1.bed.hg18	8658	3492	0.596674
./GB930104_S4/ATGACACC_readname.txt.R1.bed.hg18	5479	2020	0.63132
./GB930104_S4/ATGGCTGT_readname.txt.R1.bed.hg18	20909	6984	0.665981
./GB930104_S4/CAAGTCAC_readname.txt.R1.bed.hg18	24839	8757	0.64745
./GB930104_S4/CACTCTTG_readname.txt.R1.bed.hg18	6117	2468	0.596534
./GB930104_S4/CAGCTCTT_readname.txt.R1.bed.hg18	24655	8827	0.641979
./GB930104_S4/CTGCAATC_readname.txt.R1.bed.hg18	11759	4400	0.625819
./GB930104_S4/CTTCGTTG_readname.txt.R1.bed.hg18	11259	3817	0.660982
./GB930104_S4/GACGTTAA_readname.txt.R1.bed.hg18	6348	2315	0.635318
./GB930104_S4/GAGCGATA_readname.txt.R1.bed.hg18	4372	1916	0.561757
./GB930104_S4/GGAACTGT_readname.txt.R1.bed.hg18	11673	4297	0.631886
./GB930104_S4/GTCTCCTA_readname.txt.R1.bed.hg18	19692	6900	0.649604
./GB930104_S4/GTGAACGT_readname.txt.R1.bed.hg18	1724	1561	0.0945476
./GB930104_S4/TAACCAAG_readname.txt.R1.bed.hg18	13149	4918	0.625979
./GB930104_S4/TCCGGTAT_readname.txt.R1.bed.hg18	5909	2393	0.595025
./GB930104_S4/TCGTCGAT_readname.txt.R1.bed.hg18	8763	3275	0.62627
./GB930104_S4/TCTACTGT_readname.txt.R1.bed.hg18	21205	7439	0.649187
./GB930104_S4/TGATGCGA_readname.txt.R1.bed.hg18	16267	5710	0.648983
./GB930104_S4/TGGCGTAT_readname.txt.R1.bed.hg18	20782	7142	0.656337
./GB930105_S5/ACACACGT_readname.txt.R1.bed.hg18	20610	6999	0.660408
./GB930105_S5/ATGACACC_readname.txt.R1.bed.hg18	11468	4293	0.625654
./GB930105_S5/CAATGTGT_readname.txt.R1.bed.hg18	7981	3315	0.584639
./GB930105_S5/CAATTCGT_readname.txt.R1.bed.hg18	24170	8661	0.641663
./GB930105_S5/CACTCTTG_readname.txt.R1.bed.hg18	50151	17654	0.647983
./GB930105_S5/CAGCTCTT_readname.txt.R1.bed.hg18	10968	4308	0.607221
./GB930105_S5/CAGTGATG_readname.txt.R1.bed.hg18	8135	3377	0.58488
./GB930105_S5/CATAACTT_readname.txt.R1.bed.hg18	69491	23171	0.666561
./GB930105_S5/CATGTGTG_readname.txt.R1.bed.hg18	52140	17525	0.663886
./GB930105_S5/CCTAGTAG_readname.txt.R1.bed.hg18	28617	10066	0.648251
./GB930105_S5/CGAACTAC_readname.txt.R1.bed.hg18	42964	15094	0.648683
./GB930105_S5/CGAGAATG_readname.txt.R1.bed.hg18	53311	18969	0.644182
./GB930105_S5/CTAGTGTG_readname.txt.R1.bed.hg18	19287	6892	0.642661
./GB930105_S5/CTTCGTTG_readname.txt.R1.bed.hg18	20097	6951	0.654127
./GB930105_S5/GACTAAGA_readname.txt.R1.bed.hg18	10912	4092	0.625
./GB930105_S5/GAGACCTT_readname.txt.R1.bed.hg18	19833	6981	0.648011
./GB930105_S5/GAGCGATA_readname.txt.R1.bed.hg18	27857	9622	0.654593
./GB930105_S5/GATGGCTT_readname.txt.R1.bed.hg18	32006	10947	0.65797
./GB930105_S5/GGAACTGT_readname.txt.R1.bed.hg18	13047	4796	0.632406
./GB930105_S5/TAACGTGT_readname.txt.R1.bed.hg18	5125	2174	0.575805
./GB930105_S5/TACAGTGT_readname.txt.R1.bed.hg18	29734	10759	0.638158
./GB930105_S5/TAGTTCTG_readname.txt.R1.bed.hg18	43721	15164	0.653164
./GB930105_S5/TGATGCGA_readname.txt.R1.bed.hg18	7087	3112	0.560886
./GB930105_S5/TGGACATG_readname.txt.R1.bed.hg18	18850	6295	0.666048
./GB930106_S6/AACTGCCA_readname.txt.R1.bed.hg18	34244	11444	0.66581
./GB930106_S6/AAGAATCT_readname.txt.R1.bed.hg18	60846	21602	0.644973
./GB930106_S6/AAGAGGTT_readname.txt.R1.bed.hg18	6587	3310	0.497495
./GB930106_S6/AGTTGACC_readname.txt.R1.bed.hg18	68684	25227	0.632709
./GB930106_S6/ATAGATAC_readname.txt.R1.bed.hg18	34439	12100	0.648654
./GB930106_S6/ATGACACC_readname.txt.R1.bed.hg18	51684	18042	0.650917
./GB930106_S6/ATGACTGT_readname.txt.R1.bed.hg18	21420	7507	0.649533
./GB930106_S6/ATTAAGCG_readname.txt.R1.bed.hg18	7831	3238	0.586515
./GB930106_S6/CAAGTCAC_readname.txt.R1.bed.hg18	118135	41766	0.646455
./GB930106_S6/CAGTGATG_readname.txt.R1.bed.hg18	146411	49646	0.660913
./GB930106_S6/CATGGTGT_readname.txt.R1.bed.hg18	75206	25764	0.657421
./GB930106_S6/CGATTACA_readname.txt.R1.bed.hg18	11014	3894	0.64645
./GB930106_S6/GACGTTAA_readname.txt.R1.bed.hg18	30457	10168	0.666152
./GB930106_S6/GATAACCA_readname.txt.R1.bed.hg18	16158	5758	0.643644
./GB930106_S6/GGATCATC_readname.txt.R1.bed.hg18	42361	14240	0.663842
./GB930106_S6/GTACCGAT_readname.txt.R1.bed.hg18	7266	2818	0.612166
./GB930106_S6/GTCTCCTA_readname.txt.R1.bed.hg18	24769	8484	0.657475
./GB930106_S6/GTGAACGT_readname.txt.R1.bed.hg18	42705	14119	0.669383
./GB930106_S6/TAAGGTGT_readname.txt.R1.bed.hg18	9264	3372	0.63601
./GB930106_S6/TAGACGGA_readname.txt.R1.bed.hg18	23182	8434	0.636183
./GB930106_S6/TGATGCGA_readname.txt.R1.bed.hg18	47212	15917	0.662861
./GB930106_S6/TTAAGCAT_readname.txt.R1.bed.hg18	11045	4054	0.632956
./GB930106_S6/TTCACGAT_readname.txt.R1.bed.hg18	8742	3132	0.64173
./GB930107_S7/AAGAATCT_readname.txt.R1.bed.hg18	20660	7108	0.655954
./GB930107_S7/ACACACGT_readname.txt.R1.bed.hg18	21451	7165	0.665983
./GB930107_S7/ACGTACGT_readname.txt.R1.bed.hg18	26952	8643	0.679319
./GB930107_S7/AGAGTTGT_readname.txt.R1.bed.hg18	35958	12084	0.663941
./GB930107_S7/ATCTGATG_readname.txt.R1.bed.hg18	17946	6890	0.61607
./GB930107_S7/CAAGATAT_readname.txt.R1.bed.hg18	1993	1801	0.0963372
./GB930107_S7/CATGGTGT_readname.txt.R1.bed.hg18	13249	5245	0.604121
./GB930107_S7/CATGTATT_readname.txt.R1.bed.hg18	84789	28398	0.665074
./GB930107_S7/CCTCATGT_readname.txt.R1.bed.hg18	6481	2301	0.644962
./GB930107_S7/CGAGAATG_readname.txt.R1.bed.hg18	50045	16973	0.660845
./GB930107_S7/CTAAGTGT_readname.txt.R1.bed.hg18	15052	5195	0.654863
./GB930107_S7/CTCTGATT_readname.txt.R1.bed.hg18	34901	12612	0.638635
./GB930107_S7/CTGACGTT_readname.txt.R1.bed.hg18	35396	11994	0.661148
./GB930107_S7/CTGCAATC_readname.txt.R1.bed.hg18	16100	5496	0.658634
./GB930107_S7/CTTCGTTG_readname.txt.R1.bed.hg18	16103	5911	0.632926
./GB930107_S7/GACGTTAA_readname.txt.R1.bed.hg18	19557	6989	0.642634
./GB930107_S7/GAGACCTT_readname.txt.R1.bed.hg18	22581	7740	0.657234
./GB930107_S7/GGATCATC_readname.txt.R1.bed.hg18	6586	2405	0.634831
./GB930107_S7/TAACGTGT_readname.txt.R1.bed.hg18	5867	2801	0.522584
./GB930107_S7/TAAGGTGT_readname.txt.R1.bed.hg18	9378	3400	0.637449
./GB930107_S7/TACACTGT_readname.txt.R1.bed.hg18	9568	3205	0.665029
./GB930107_S7/TAGTTCTG_readname.txt.R1.bed.hg18	54440	18420	0.661646
./GB930107_S7/TGGCGTAT_readname.txt.R1.bed.hg18	25229	8696	0.655317
./GB930108_S8/AAGAGGTT_readname.txt.R1.bed.hg18	55317	19425	0.648842
./GB930108_S8/ACGTACGT_readname.txt.R1.bed.hg18	6701	2499	0.627071
./GB930108_S8/ATACGACT_readname.txt.R1.bed.hg18	46550	16479	0.645994
./GB930108_S8/ATAGATAC_readname.txt.R1.bed.hg18	31836	12090	0.620241
./GB930108_S8/ATGACTGT_readname.txt.R1.bed.hg18	3398	1547	0.544732
./GB930108_S8/ATGGCTGT_readname.txt.R1.bed.hg18	5070	2006	0.604339
./GB930108_S8/ATTAAGCG_readname.txt.R1.bed.hg18	35176	14477	0.588441
./GB930108_S8/ATTGGCGT_readname.txt.R1.bed.hg18	43108	19036	0.558411
./GB930108_S8/CAAGATAT_readname.txt.R1.bed.hg18	5808	2461	0.576274
./GB930108_S8/CAATTCGT_readname.txt.R1.bed.hg18	9729	3883	0.600884
./GB930108_S8/CATGTAGA_readname.txt.R1.bed.hg18	42119	15522	0.631473
./GB930108_S8/CCTCATGT_readname.txt.R1.bed.hg18	42316	14710	0.652377
./GB930108_S8/CTAAGTGT_readname.txt.R1.bed.hg18	21347	8085	0.621258
./GB930108_S8/CTAGTGTG_readname.txt.R1.bed.hg18	8374	3282	0.608073
./GB930108_S8/GAGACCTT_readname.txt.R1.bed.hg18	39628	13781	0.652241
./GB930108_S8/GATAACCA_readname.txt.R1.bed.hg18	80490	28486	0.646093
./GB930108_S8/GATGGCTT_readname.txt.R1.bed.hg18	27609	9468	0.657068
./GB930108_S8/GGTCAATG_readname.txt.R1.bed.hg18	43753	15381	0.648458
./GB930108_S8/GTCTCCTA_readname.txt.R1.bed.hg18	11871	4443	0.625727
./GB930108_S8/GTGAACGT_readname.txt.R1.bed.hg18	141764	49487	0.65092
./GB930108_S8/TAACCAAG_readname.txt.R1.bed.hg18	25160	9601	0.618402
./GB930108_S8/TAACGTGT_readname.txt.R1.bed.hg18	19593	6922	0.646711
./GB930108_S8/TCGTCGAT_readname.txt.R1.bed.hg18	40116	14597	0.63613
./GB930108_S8/TTAAGCAT_readname.txt.R1.bed.hg18	38836	14142	0.635853
./GB930109_S9/AAGAGGTT_readname.txt.R1.bed.hg18	24216	8739	0.639123
./GB930109_S9/AATGACAG_readname.txt.R1.bed.hg18	5376	2137	0.602493
./GB930109_S9/AGGTTGCT_readname.txt.R1.bed.hg18	130137	45227	0.652466
./GB930109_S9/ATACGACT_readname.txt.R1.bed.hg18	7455	3071	0.588062
./GB930109_S9/ATGGACTG_readname.txt.R1.bed.hg18	16952	6106	0.639807
./GB930109_S9/CATGTATT_readname.txt.R1.bed.hg18	62968	22363	0.644851
./GB930109_S9/CCTCATGT_readname.txt.R1.bed.hg18	9595	3785	0.605524
./GB930109_S9/CGAACTAC_readname.txt.R1.bed.hg18	58643	20464	0.651041
./GB930109_S9/CTGACGTT_readname.txt.R1.bed.hg18	19089	6385	0.665514
./GB930109_S9/GACTAAGA_readname.txt.R1.bed.hg18	55173	19968	0.638084
./GB930109_S9/GAGACCTT_readname.txt.R1.bed.hg18	9684	3570	0.631351
./GB930109_S9/GATATTGT_readname.txt.R1.bed.hg18	7757	2944	0.620472
./GB930109_S9/GGAACTGT_readname.txt.R1.bed.hg18	7544	2947	0.609358
./GB930109_S9/GGATCATC_readname.txt.R1.bed.hg18	8204	3143	0.616894
./GB930109_S9/GTTATATC_readname.txt.R1.bed.hg18	37903	13534	0.642931
./GB930109_S9/TAACGTGT_readname.txt.R1.bed.hg18	62147	21468	0.654561
./GB930109_S9/TAAGGTGT_readname.txt.R1.bed.hg18	167434	56977	0.659705
./GB930109_S9/TACAGTGT_readname.txt.R1.bed.hg18	18497	6534	0.646754
./GB930109_S9/TCCTGCTG_readname.txt.R1.bed.hg18	24828	8520	0.656839
./GB930109_S9/TCGTCGAT_readname.txt.R1.bed.hg18	29108	10179	0.650302
./GB930109_S9/TCGTTAGC_readname.txt.R1.bed.hg18	59973	20180	0.663515
./GB930109_S9/TCTACTGT_readname.txt.R1.bed.hg18	19192	6998	0.635369
./GB930109_S9/TGGACATG_readname.txt.R1.bed.hg18	14208	5141	0.638162
./GB930110_S10/AACTGCCA_readname.txt.R1.bed.hg18	31865	11285	0.64585
./GB930110_S10/AATGACAG_readname.txt.R1.bed.hg18	40542	14373	0.645479
./GB930110_S10/AGAATCAG_readname.txt.R1.bed.hg18	19587	7133	0.63583
./GB930110_S10/ATGACTGT_readname.txt.R1.bed.hg18	15135	5514	0.635679
./GB930110_S10/ATGGACTG_readname.txt.R1.bed.hg18	36113	13551	0.624761
./GB930110_S10/ATTGGCGT_readname.txt.R1.bed.hg18	4748	2088	0.560236
./GB930110_S10/CATATGCT_readname.txt.R1.bed.hg18	4157	2358	0.432764
./GB930110_S10/CATGTATT_readname.txt.R1.bed.hg18	42075	14763	0.649127
./GB930110_S10/CGATTACA_readname.txt.R1.bed.hg18	70358	25021	0.644376
./GB930110_S10/CTCTGATT_readname.txt.R1.bed.hg18	37064	13097	0.646638
./GB930110_S10/GACGTTAA_readname.txt.R1.bed.hg18	51368	17786	0.653753
./GB930110_S10/GATATTGT_readname.txt.R1.bed.hg18	47311	16676	0.647524
./GB930110_S10/GGATCATC_readname.txt.R1.bed.hg18	30570	10461	0.657802
./GB930110_S10/GTACCGAT_readname.txt.R1.bed.hg18	13927	5028	0.638975
./GB930110_S10/TAACGTGT_readname.txt.R1.bed.hg18	92634	32570	0.648401
./GB930110_S10/TAAGGTGT_readname.txt.R1.bed.hg18	6745	2735	0.594514
./GB930110_S10/TAGACGGA_readname.txt.R1.bed.hg18	11960	4244	0.645151
./GB930110_S10/TAGTTCTG_readname.txt.R1.bed.hg18	4910	2057	0.581059
./GB930110_S10/TCCGGTAT_readname.txt.R1.bed.hg18	61614	21599	0.649447
./GB930110_S10/TCGTTAGC_readname.txt.R1.bed.hg18	45844	15305	0.66615
./GB930110_S10/TGAGCGAA_readname.txt.R1.bed.hg18	13527	4913	0.6368
./GB930110_S10/TGGACATG_readname.txt.R1.bed.hg18	68725	24329	0.645995
./GB930111_S11/AATCGGAT_readname.txt.R1.bed.hg18	19719	6889	0.650642
./GB930111_S11/AGTTGACC_readname.txt.R1.bed.hg18	34457	12430	0.639261
./GB930111_S11/ATACGACT_readname.txt.R1.bed.hg18	71269	23751	0.666742
./GB930111_S11/ATGACACC_readname.txt.R1.bed.hg18	34563	11598	0.664439
./GB930111_S11/CAAGATAT_readname.txt.R1.bed.hg18	32436	11194	0.65489
./GB930111_S11/CAATGTGT_readname.txt.R1.bed.hg18	12952	4793	0.629941
./GB930111_S11/CAATTCGT_readname.txt.R1.bed.hg18	17941	5983	0.666518
./GB930111_S11/CAGTGATG_readname.txt.R1.bed.hg18	2227	1856	0.166592
./GB930111_S11/CATGTGTG_readname.txt.R1.bed.hg18	12846	4523	0.647906
./GB930111_S11/CGAACTAC_readname.txt.R1.bed.hg18	15185	5539	0.635232
./GB930111_S11/CTAAGTGT_readname.txt.R1.bed.hg18	14574	5404	0.629203
./GB930111_S11/GCGTAATT_readname.txt.R1.bed.hg18	16599	5599	0.662691
./GB930111_S11/GGAACTGT_readname.txt.R1.bed.hg18	58671	20188	0.655912
./GB930111_S11/TAACGTGT_readname.txt.R1.bed.hg18	1944	1754	0.0977366
./GB930111_S11/TACACTGT_readname.txt.R1.bed.hg18	7554	2647	0.64959
./GB930111_S11/TACAGTGT_readname.txt.R1.bed.hg18	10486	3860	0.63189
./GB930111_S11/TAGTTCTG_readname.txt.R1.bed.hg18	20517	7020	0.657845
./GB930111_S11/TCAAGTTG_readname.txt.R1.bed.hg18	59191	19993	0.662229
./GB930111_S11/TCGTCGAT_readname.txt.R1.bed.hg18	120306	40963	0.65951
./GB930111_S11/TCGTTAGC_readname.txt.R1.bed.hg18	40099	12994	0.675952
./GB930111_S11/TGCAGACA_readname.txt.R1.bed.hg18	13598	5032	0.629946
./GB930111_S11/TGGCGTAT_readname.txt.R1.bed.hg18	6279	2484	0.604396
./GB930111_S11/TTCACGAT_readname.txt.R1.bed.hg18	41663	13620	0.673091
./GB930112_S12/ACACACGT_readname.txt.R1.bed.hg18	18388	6314	0.656624
./GB930112_S12/ACGTACTC_readname.txt.R1.bed.hg18	6896	2353	0.658788
./GB930112_S12/ATAGATAC_readname.txt.R1.bed.hg18	8760	3213	0.633219
./GB930112_S12/ATCTGATG_readname.txt.R1.bed.hg18	10393	4027	0.612528
./GB930112_S12/ATGACACC_readname.txt.R1.bed.hg18	13132	4829	0.632272
./GB930112_S12/ATGGCTGT_readname.txt.R1.bed.hg18	64850	21805	0.663763
./GB930112_S12/CAAGTCAC_readname.txt.R1.bed.hg18	16669	5718	0.656968
./GB930112_S12/CAATGTGT_readname.txt.R1.bed.hg18	19340	6904	0.64302
./GB930112_S12/CACAGTTG_readname.txt.R1.bed.hg18	12696	5056	0.601764
./GB930112_S12/CAGCTCTT_readname.txt.R1.bed.hg18	31184	10953	0.648762
./GB930112_S12/CAGTGATG_readname.txt.R1.bed.hg18	87753	29617	0.662496
./GB930112_S12/CATGGTGT_readname.txt.R1.bed.hg18	9418	3418	0.637078
./GB930112_S12/CCTAGTAG_readname.txt.R1.bed.hg18	12742	4641	0.635771
./GB930112_S12/CGAGAATG_readname.txt.R1.bed.hg18	51425	19567	0.619504
./GB930112_S12/CTGACGTT_readname.txt.R1.bed.hg18	10063	3518	0.650402
./GB930112_S12/GACTGTGT_readname.txt.R1.bed.hg18	89408	31288	0.650054
./GB930112_S12/GAGCGATA_readname.txt.R1.bed.hg18	38004	13690	0.639775
./GB930112_S12/GATATTGT_readname.txt.R1.bed.hg18	43567	15497	0.644295
./GB930112_S12/GATGGCTT_readname.txt.R1.bed.hg18	9830	3479	0.646083
./GB930112_S12/TAGACGGA_readname.txt.R1.bed.hg18	20969	7223	0.655539
./GB930112_S12/TAGCAGTT_readname.txt.R1.bed.hg18	22050	7471	0.661179
./GB930112_S12/TCATCGTG_readname.txt.R1.bed.hg18	12741	4788	0.624205
./GB930112_S12/TCCTGCTG_readname.txt.R1.bed.hg18	42788	15222	0.644246
./GB930112_S12/TGCAGACA_readname.txt.R1.bed.hg18	86320	28902	0.665176
./GB930113_S13/AATCGGAT_readname.txt.R1.bed.hg18	39649	14460	0.6353
./GB930113_S13/ACACACGT_readname.txt.R1.bed.hg18	12221	4496	0.632109
./GB930113_S13/AGAATCAG_readname.txt.R1.bed.hg18	40881	14535	0.644456
./GB930113_S13/AGAGTTGT_readname.txt.R1.bed.hg18	8452	3246	0.615949
./GB930113_S13/AGTTGACC_readname.txt.R1.bed.hg18	34574	12393	0.641551
./GB930113_S13/ATACGACT_readname.txt.R1.bed.hg18	6208	2456	0.604381
./GB930113_S13/ATGACTGT_readname.txt.R1.bed.hg18	36771	12775	0.652579
./GB930113_S13/CCTAGTAG_readname.txt.R1.bed.hg18	39560	14065	0.644464
./GB930113_S13/CGAGAATG_readname.txt.R1.bed.hg18	24498	8987	0.633154
./GB930113_S13/CGATTACA_readname.txt.R1.bed.hg18	7751	2955	0.618759
./GB930113_S13/CTAGTGTG_readname.txt.R1.bed.hg18	82270	29018	0.647283
./GB930113_S13/CTTCGTTG_readname.txt.R1.bed.hg18	11948	4458	0.626883
./GB930113_S13/GCTTAGTA_readname.txt.R1.bed.hg18	90443	32710	0.638336
./GB930113_S13/GTGAACGT_readname.txt.R1.bed.hg18	27157	9435	0.652576
./GB930113_S13/GTTATATC_readname.txt.R1.bed.hg18	52267	18774	0.640806
./GB930113_S13/TAACCAAG_readname.txt.R1.bed.hg18	9301	3598	0.61316
./GB930113_S13/TAACGTGT_readname.txt.R1.bed.hg18	58787	20380	0.653325
./GB930113_S13/TACAGTGT_readname.txt.R1.bed.hg18	13374	4841	0.638029
./GB930113_S13/TAGACGGA_readname.txt.R1.bed.hg18	11826	4647	0.607052
./GB930113_S13/TAGCAGTT_readname.txt.R1.bed.hg18	57068	19960	0.650242
./GB930113_S13/TCAGCTTG_readname.txt.R1.bed.hg18	13602	4975	0.634245
./GB930113_S13/TCCGGTAT_readname.txt.R1.bed.hg18	12570	4623	0.63222
./GB930113_S13/TGATGCGA_readname.txt.R1.bed.hg18	31290	10834	0.653755
./GB930113_S13/TGGCGTAT_readname.txt.R1.bed.hg18	45242	15569	0.655873
./GB930113_S13/TTAAGCAT_readname.txt.R1.bed.hg18	53389	19386	0.636891
./GB930114_S14/AACTGCCA_readname.txt.R1.bed.hg18	31093	10632	0.658058
./GB930114_S14/AAGAGGTT_readname.txt.R1.bed.hg18	7390	2825	0.617727
./GB930114_S14/AGGCTTGA_readname.txt.R1.bed.hg18	14059	5023	0.64272
./GB930114_S14/AGGTTGCT_readname.txt.R1.bed.hg18	10261	3828	0.626937
./GB930114_S14/ATGACACC_readname.txt.R1.bed.hg18	11926	4543	0.619068
./GB930114_S14/ATTAAGCG_readname.txt.R1.bed.hg18	18636	7436	0.600987
./GB930114_S14/ATTGGCGT_readname.txt.R1.bed.hg18	65224	23351	0.641988
./GB930114_S14/CAAGATAT_readname.txt.R1.bed.hg18	4609	1750	0.620308
./GB930114_S14/CACAGTTG_readname.txt.R1.bed.hg18	12302	4401	0.642253
./GB930114_S14/CACTCTTG_readname.txt.R1.bed.hg18	40620	13871	0.658518
./GB930114_S14/CAGCTCTT_readname.txt.R1.bed.hg18	59326	20371	0.656626
./GB930114_S14/CATGGTGT_readname.txt.R1.bed.hg18	26806	9218	0.656122
./GB930114_S14/CATGTGTG_readname.txt.R1.bed.hg18	58357	19770	0.661223
./GB930114_S14/CGTAATTA_readname.txt.R1.bed.hg18	9941	6004	0.396037
./GB930114_S14/GATAACCA_readname.txt.R1.bed.hg18	10142	3735	0.631729
./GB930114_S14/GTACCGAT_readname.txt.R1.bed.hg18	31455	10796	0.65678
./GB930114_S14/GTTATATC_readname.txt.R1.bed.hg18	51775	18049	0.651395
./GB930114_S14/TAACGTGT_readname.txt.R1.bed.hg18	3763	1564	0.584374
./GB930114_S14/TAAGGTGT_readname.txt.R1.bed.hg18	19321	7159	0.629471
./GB930114_S14/TCCTGCTG_readname.txt.R1.bed.hg18	25929	9627	0.628717
./GB930114_S14/TCTACTGT_readname.txt.R1.bed.hg18	47593	16413	0.655138
./GB930114_S14/TCTGTTGT_readname.txt.R1.bed.hg18	14254	5462	0.616809
./GB930114_S14/TGATGCGA_readname.txt.R1.bed.hg18	14417	5007	0.652702
./GB930115_S15/AAGAATCT_readname.txt.R1.bed.hg18	56848	20865	0.632969
./GB930115_S15/AATGACAG_readname.txt.R1.bed.hg18	5898	2415	0.590539
./GB930115_S15/AGAATCAG_readname.txt.R1.bed.hg18	12367	5006	0.595213
./GB930115_S15/AGAGTTGT_readname.txt.R1.bed.hg18	20006	7125	0.643857
./GB930115_S15/AGGTTGCT_readname.txt.R1.bed.hg18	3715	1682	0.547241
./GB930115_S15/ATGACTGT_readname.txt.R1.bed.hg18	4052	1797	0.556515
./GB930115_S15/CAAGATAT_readname.txt.R1.bed.hg18	26025	8987	0.654678
./GB930115_S15/CATGTATT_readname.txt.R1.bed.hg18	6499	2642	0.593476
./GB930115_S15/CATGTGTG_readname.txt.R1.bed.hg18	68073	24106	0.64588
./GB930115_S15/CCTAGTAG_readname.txt.R1.bed.hg18	42948	15355	0.642475
./GB930115_S15/CGAACTAC_readname.txt.R1.bed.hg18	33569	11713	0.651077
./GB930115_S15/CGTAATTA_readname.txt.R1.bed.hg18	3750	1893	0.4952
./GB930115_S15/CTGACGTT_readname.txt.R1.bed.hg18	9822	3551	0.638465
./GB930115_S15/GAGACCTT_readname.txt.R1.bed.hg18	64642	22021	0.659339
./GB930115_S15/GATAACCA_readname.txt.R1.bed.hg18	39015	13547	0.652775
./GB930115_S15/GCTTAGTA_readname.txt.R1.bed.hg18	9059	3360	0.629098
./GB930115_S15/GGAACTGT_readname.txt.R1.bed.hg18	84391	30261	0.641419
./GB930115_S15/TAAGGTGT_readname.txt.R1.bed.hg18	96909	34575	0.643222
./GB930115_S15/TAGCAGTT_readname.txt.R1.bed.hg18	21649	8112	0.625294
./GB930115_S15/TCAGCTTG_readname.txt.R1.bed.hg18	119771	45154	0.622997
./GB930115_S15/TCCGGTAT_readname.txt.R1.bed.hg18	50783	17441	0.656558
./GB930115_S15/TCGATTAA_readname.txt.R1.bed.hg18	67824	24685	0.636043
./GB930115_S15/TGATGCGA_readname.txt.R1.bed.hg18	110277	38740	0.648703
./GB930115_S15/TGGCGTAT_readname.txt.R1.bed.hg18	22571	7885	0.650658
./GB930115_S15/TTAAGCAT_readname.txt.R1.bed.hg18	107578	38363	0.643394
./GB930116_S16/AACTGCCA_readname.txt.R1.bed.hg18	61329	20358	0.668053
./GB930116_S16/AGAATCAG_readname.txt.R1.bed.hg18	42290	14457	0.658146
./GB930116_S16/AGAGTTGT_readname.txt.R1.bed.hg18	12826	4278	0.666459
./GB930116_S16/ATCTGATG_readname.txt.R1.bed.hg18	23738	8694	0.633752
./GB930116_S16/ATGACACC_readname.txt.R1.bed.hg18	132308	44024	0.667261
./GB930116_S16/ATGACTGT_readname.txt.R1.bed.hg18	10833	4290	0.603988
./GB930116_S16/CACAGTTG_readname.txt.R1.bed.hg18	14134	5005	0.645889
./GB930116_S16/CATGGTGT_readname.txt.R1.bed.hg18	77885	26462	0.660243
./GB930116_S16/CCTCATGT_readname.txt.R1.bed.hg18	40104	13383	0.666293
./GB930116_S16/CGAGAATG_readname.txt.R1.bed.hg18	18620	6363	0.658271
./GB930116_S16/CTCTGATT_readname.txt.R1.bed.hg18	1651	1500	0.0914597
./GB930116_S16/GACGTTAA_readname.txt.R1.bed.hg18	6156	2577	0.581384
./GB930116_S16/GATGGCTT_readname.txt.R1.bed.hg18	8689	3221	0.629301
./GB930116_S16/GGAACTGT_readname.txt.R1.bed.hg18	33683	11777	0.650358
./GB930116_S16/TACAGTGT_readname.txt.R1.bed.hg18	23213	7965	0.656873
./GB930116_S16/TCAAGTTG_readname.txt.R1.bed.hg18	12873	4598	0.642818
./GB930116_S16/TCCTGCTG_readname.txt.R1.bed.hg18	21603	7157	0.668703
./GB930116_S16/TCGTCGAT_readname.txt.R1.bed.hg18	29610	10217	0.654948
./GB930116_S16/TCGTTAGC_readname.txt.R1.bed.hg18	12681	4190	0.669584
./GB930116_S16/TCTACTGT_readname.txt.R1.bed.hg18	17521	5890	0.663832
./GB930116_S16/TGATGCGA_readname.txt.R1.bed.hg18	22983	7595	0.669538
./GB930116_S16/TGGCGTAT_readname.txt.R1.bed.hg18	189232	64447	0.659429
./GB930116_S16/TTCACGAT_readname.txt.R1.bed.hg18	10156	3540	0.651438
./GB930117_S17/AAGAATCT_readname.txt.R1.bed.hg18	70825	25734	0.636654
./GB930117_S17/AATCGGAT_readname.txt.R1.bed.hg18	20566	7330	0.643587
./GB930117_S17/AATGACAG_readname.txt.R1.bed.hg18	11316	4341	0.616384
./GB930117_S17/AGAATCAG_readname.txt.R1.bed.hg18	34105	13305	0.609881
./GB930117_S17/AGAGTTGT_readname.txt.R1.bed.hg18	9644	3635	0.623082
./GB930117_S17/ATGACACC_readname.txt.R1.bed.hg18	55214	20580	0.627268
./GB930117_S17/ATGACTGT_readname.txt.R1.bed.hg18	49725	17956	0.638894
./GB930117_S17/ATTGGCGT_readname.txt.R1.bed.hg18	46798	17346	0.629343
./GB930117_S17/CAAGTCAC_readname.txt.R1.bed.hg18	15899	6098	0.616454
./GB930117_S17/CAGCTCTT_readname.txt.R1.bed.hg18	16212	6340	0.608932
./GB930117_S17/CATAACTT_readname.txt.R1.bed.hg18	7177	2678	0.626864
./GB930117_S17/CCTCATGT_readname.txt.R1.bed.hg18	34284	12677	0.630236
./GB930117_S17/CGTAATTA_readname.txt.R1.bed.hg18	12558	6840	0.455327
./GB930117_S17/CTAAGTGT_readname.txt.R1.bed.hg18	24599	8829	0.641083
./GB930117_S17/CTGCAATC_readname.txt.R1.bed.hg18	15303	5964	0.610272
./GB930117_S17/GATAACCA_readname.txt.R1.bed.hg18	37434	13528	0.638617
./GB930117_S17/GCGTAATT_readname.txt.R1.bed.hg18	8584	3405	0.603332
./GB930117_S17/GGATCATC_readname.txt.R1.bed.hg18	25286	8958	0.645733
./GB930117_S17/GTCTCCTA_readname.txt.R1.bed.hg18	15080	5961	0.604708
./GB930117_S17/TAGCAGTT_readname.txt.R1.bed.hg18	91662	33035	0.6396
./GB930117_S17/TCCGGTAT_readname.txt.R1.bed.hg18	29890	10818	0.638073
./GB930117_S17/TCTGTTGT_readname.txt.R1.bed.hg18	62131	22056	0.645008
./GB930117_S17/TTAAGCAT_readname.txt.R1.bed.hg18	9476	3839	0.594871
./GB930117_S17/TTCACGAT_readname.txt.R1.bed.hg18	178874	66085	0.63055
./GB930118_S18/AACTGCCA_readname.txt.R1.bed.hg18	11110	4011	0.638974
./GB930118_S18/AAGAGGTT_readname.txt.R1.bed.hg18	30273	10160	0.664387
./GB930118_S18/AGTTGACC_readname.txt.R1.bed.hg18	8750	3175	0.637143
./GB930118_S18/ATGACTGT_readname.txt.R1.bed.hg18	44181	14828	0.664381
./GB930118_S18/ATGGCTGT_readname.txt.R1.bed.hg18	17764	6252	0.648052
./GB930118_S18/ATTAAGCG_readname.txt.R1.bed.hg18	16879	6674	0.604597
./GB930118_S18/CAATGTGT_readname.txt.R1.bed.hg18	43405	14772	0.659671
./GB930118_S18/CACTCTTG_readname.txt.R1.bed.hg18	46553	16392	0.647885
./GB930118_S18/CAGCTCTT_readname.txt.R1.bed.hg18	6844	2723	0.602133
./GB930118_S18/CATGTGTG_readname.txt.R1.bed.hg18	36562	12549	0.656775
./GB930118_S18/CTAGTGTG_readname.txt.R1.bed.hg18	7344	2904	0.604575
./GB930118_S18/CTCTGATT_readname.txt.R1.bed.hg18	21840	7481	0.657463
./GB930118_S18/CTGCAATC_readname.txt.R1.bed.hg18	127464	42812	0.664125
./GB930118_S18/GACTAAGA_readname.txt.R1.bed.hg18	24561	8234	0.664753
./GB930118_S18/GAGACCTT_readname.txt.R1.bed.hg18	44749	15294	0.658227
./GB930118_S18/GATATTGT_readname.txt.R1.bed.hg18	19384	7203	0.628405
./GB930118_S18/GATGGCTT_readname.txt.R1.bed.hg18	10373	3988	0.61554
./GB930118_S18/GGATCATC_readname.txt.R1.bed.hg18	17544	6206	0.646261
./GB930118_S18/TACACTGT_readname.txt.R1.bed.hg18	14388	5510	0.617042
./GB930118_S18/TAGACGGA_readname.txt.R1.bed.hg18	13118	4547	0.653377
./GB930118_S18/TCAAGTTG_readname.txt.R1.bed.hg18	12645	4569	0.638671
./GB930118_S18/TGATGCGA_readname.txt.R1.bed.hg18	13750	4969	0.638618
./GB930118_S18/TGCAGACA_readname.txt.R1.bed.hg18	8568	3713	0.566643
./GB930118_S18/TGGACATG_readname.txt.R1.bed.hg18	52723	17713	0.664037
./GB930118_S18/TTAAGCAT_readname.txt.R1.bed.hg18	16221	6284	0.612601
./GB930119_S19/ACACACGT_readname.txt.R1.bed.hg18	16719	5642	0.66254
./GB930119_S19/ACTGCATG_readname.txt.R1.bed.hg18	11720	3967	0.661519
./GB930119_S19/AGAATCAG_readname.txt.R1.bed.hg18	30238	10112	0.665586
./GB930119_S19/AGGCTTGA_readname.txt.R1.bed.hg18	10804	3944	0.63495
./GB930119_S19/ATATGCTG_readname.txt.R1.bed.hg18	11599	4273	0.631606
./GB930119_S19/ATCTGATG_readname.txt.R1.bed.hg18	42312	13883	0.67189
./GB930119_S19/ATGACACC_readname.txt.R1.bed.hg18	35204	13506	0.61635
./GB930119_S19/ATGGCTGT_readname.txt.R1.bed.hg18	15512	5211	0.664067
./GB930119_S19/CAATGTGT_readname.txt.R1.bed.hg18	86220	30538	0.645813
./GB930119_S19/CACAGTTG_readname.txt.R1.bed.hg18	2803	2550	0.0902604
./GB930119_S19/CAGTGATG_readname.txt.R1.bed.hg18	13044	4782	0.633395
./GB930119_S19/CATGGTGT_readname.txt.R1.bed.hg18	6243	2766	0.556944
./GB930119_S19/CCTCATGT_readname.txt.R1.bed.hg18	9603	3654	0.619494
./GB930119_S19/CGATTACA_readname.txt.R1.bed.hg18	7841	2792	0.643923
./GB930119_S19/CTAAGTGT_readname.txt.R1.bed.hg18	56088	19922	0.644808
./GB930119_S19/CTAGTGTG_readname.txt.R1.bed.hg18	6984	2636	0.622566
./GB930119_S19/CTGCAATC_readname.txt.R1.bed.hg18	71160	26128	0.632827
./GB930119_S19/GACGTTAA_readname.txt.R1.bed.hg18	88670	30874	0.65181
./GB930119_S19/GTCTCCTA_readname.txt.R1.bed.hg18	36711	12666	0.654981
./GB930119_S19/TACAGTGT_readname.txt.R1.bed.hg18	45164	15030	0.667213
./GB930119_S19/TACGCGTT_readname.txt.R1.bed.hg18	69559	23378	0.663911
./GB930119_S19/TCCGGTAT_readname.txt.R1.bed.hg18	65619	22882	0.65129
./GB930119_S19/TCGTTAGC_readname.txt.R1.bed.hg18	26799	9218	0.656032
./GB930119_S19/TGAGCGAA_readname.txt.R1.bed.hg18	25168	8462	0.663779
./GB930119_S19/TTAAGCAT_readname.txt.R1.bed.hg18	8993	3430	0.618592
./GB930120_S20/AATCGGAT_readname.txt.R1.bed.hg18	103642	36811	0.644825
./GB930120_S20/AATGACAG_readname.txt.R1.bed.hg18	7922	2896	0.634436
./GB930120_S20/ACACACGT_readname.txt.R1.bed.hg18	14911	5817	0.609885
./GB930120_S20/ATACGACT_readname.txt.R1.bed.hg18	5905	2245	0.619814
./GB930120_S20/ATGACTGT_readname.txt.R1.bed.hg18	7315	2637	0.639508
./GB930120_S20/ATTAAGCG_readname.txt.R1.bed.hg18	13440	5238	0.610268
./GB930120_S20/CAAGTCAC_readname.txt.R1.bed.hg18	64094	21397	0.666162
./GB930120_S20/CACAGTTG_readname.txt.R1.bed.hg18	71110	23595	0.66819
./GB930120_S20/CAGTGATG_readname.txt.R1.bed.hg18	66349	22939	0.654268
./GB930120_S20/CATGTAGA_readname.txt.R1.bed.hg18	117486	39205	0.666301
./GB930120_S20/CCTAGTAG_readname.txt.R1.bed.hg18	98341	35751	0.636459
./GB930120_S20/CCTCATGT_readname.txt.R1.bed.hg18	11377	4040	0.644898
./GB930120_S20/CTAAGTGT_readname.txt.R1.bed.hg18	61394	21666	0.647099
./GB930120_S20/GACTAAGA_readname.txt.R1.bed.hg18	33160	11453	0.654614
./GB930120_S20/GCGTAATT_readname.txt.R1.bed.hg18	75571	25237	0.666049
./GB930120_S20/GCTTAGTA_readname.txt.R1.bed.hg18	75879	25222	0.667602
./GB930120_S20/TACACTGT_readname.txt.R1.bed.hg18	14772	5140	0.652044
./GB930120_S20/TAGCAGTT_readname.txt.R1.bed.hg18	14413	5435	0.62291
./GB930120_S20/TAGTTCTG_readname.txt.R1.bed.hg18	46031	15787	0.657035
./GB930120_S20/TCAAGTTG_readname.txt.R1.bed.hg18	14511	5337	0.63221
./GB930120_S20/TCCTGCTG_readname.txt.R1.bed.hg18	58011	19208	0.66889
./GB930120_S20/TGAGCGAA_readname.txt.R1.bed.hg18	8931	3132	0.649311
./GB930121_S21/AACTGCCA_readname.txt.R1.bed.hg18	49682	17711	0.643513
./GB930121_S21/AGAATCAG_readname.txt.R1.bed.hg18	5765	2506	0.565308
./GB930121_S21/ATCTGATG_readname.txt.R1.bed.hg18	7419	2726	0.632565
./GB930121_S21/ATGACACC_readname.txt.R1.bed.hg18	11959	4620	0.61368
./GB930121_S21/ATGGACTG_readname.txt.R1.bed.hg18	13104	4741	0.638202
./GB930121_S21/ATGGCTGT_readname.txt.R1.bed.hg18	6598	2381	0.639133
./GB930121_S21/ATTAAGCG_readname.txt.R1.bed.hg18	5750	2428	0.577739
./GB930121_S21/CAAGATAT_readname.txt.R1.bed.hg18	12717	4783	0.623889
./GB930121_S21/CAAGGTCA_readname.txt.R1.bed.hg18	62929	21788	0.653769
./GB930121_S21/CAGCTCTT_readname.txt.R1.bed.hg18	9646	3679	0.618598
./GB930121_S21/CAGTGATG_readname.txt.R1.bed.hg18	18950	6691	0.646913
./GB930121_S21/CATGTGTG_readname.txt.R1.bed.hg18	45038	16045	0.643745
./GB930121_S21/CCTCATGT_readname.txt.R1.bed.hg18	43633	15288	0.649623
./GB930121_S21/CGAGAATG_readname.txt.R1.bed.hg18	4315	1854	0.570336
./GB930121_S21/CTAGTGTG_readname.txt.R1.bed.hg18	9090	3448	0.620682
./GB930121_S21/CTGACGTT_readname.txt.R1.bed.hg18	9742	3471	0.643708
./GB930121_S21/GAGACCTT_readname.txt.R1.bed.hg18	36936	12768	0.654321
./GB930121_S21/GATAACCA_readname.txt.R1.bed.hg18	6409	2371	0.630051
./GB930121_S21/GATGGCTT_readname.txt.R1.bed.hg18	49056	17210	0.649176
./GB930121_S21/GGAACTGT_readname.txt.R1.bed.hg18	7830	2969	0.620817
./GB930121_S21/TAGCAGTT_readname.txt.R1.bed.hg18	50734	18530	0.634762
./GB930121_S21/TCCGGTAT_readname.txt.R1.bed.hg18	26033	9412	0.638459
./GB930121_S21/TCGTCGAT_readname.txt.R1.bed.hg18	20479	7394	0.638947
./GB930121_S21/TGATGCGA_readname.txt.R1.bed.hg18	34258	12006	0.649542
./GB930121_S21/TTCACGAT_readname.txt.R1.bed.hg18	9951	3649	0.633303
./GB930122_S22/AACTGCCA_readname.txt.R1.bed.hg18	1955	1750	0.104859
./GB930122_S22/ACACACGT_readname.txt.R1.bed.hg18	8517	3274	0.615592
./GB930122_S22/AGAATCAG_readname.txt.R1.bed.hg18	8007	3063	0.61746
./GB930122_S22/AGGTTGCT_readname.txt.R1.bed.hg18	86117	31012	0.639885
./GB930122_S22/AGTTGACC_readname.txt.R1.bed.hg18	20338	7982	0.607533
./GB930122_S22/ATGACACC_readname.txt.R1.bed.hg18	15203	5529	0.636322
./GB930122_S22/ATGACTGT_readname.txt.R1.bed.hg18	19130	6463	0.662154
./GB930122_S22/ATTGGCGT_readname.txt.R1.bed.hg18	12502	4674	0.62614
./GB930122_S22/CAAGTCAC_readname.txt.R1.bed.hg18	9555	3581	0.625222
./GB930122_S22/CACTCTTG_readname.txt.R1.bed.hg18	5969	2369	0.603116
./GB930122_S22/CATAACTT_readname.txt.R1.bed.hg18	16582	5687	0.657038
./GB930122_S22/CATATGCT_readname.txt.R1.bed.hg18	3143	1671	0.468342
./GB930122_S22/CATGTATT_readname.txt.R1.bed.hg18	10618	3780	0.644001
./GB930122_S22/CATGTGTG_readname.txt.R1.bed.hg18	7186	2590	0.639577
./GB930122_S22/CGAACTAC_readname.txt.R1.bed.hg18	51304	18201	0.645232
./GB930122_S22/CTCTGATT_readname.txt.R1.bed.hg18	21065	7348	0.651175
./GB930122_S22/GACGTTAA_readname.txt.R1.bed.hg18	79109	27807	0.648498
./GB930122_S22/GCGTAATT_readname.txt.R1.bed.hg18	12351	4222	0.658165
./GB930122_S22/GGATCATC_readname.txt.R1.bed.hg18	26553	8998	0.661131
./GB930122_S22/TAACGTGT_readname.txt.R1.bed.hg18	34916	12161	0.651707
./GB930122_S22/TACAGTGT_readname.txt.R1.bed.hg18	62772	22479	0.641894
./GB930122_S22/TACGCGTT_readname.txt.R1.bed.hg18	52992	18119	0.65808
./GB930122_S22/TAGCAGTT_readname.txt.R1.bed.hg18	35114	12453	0.645355
./GB930122_S22/TCGTTAGC_readname.txt.R1.bed.hg18	8730	3181	0.635624
./GB930122_S22/TGGCGTAT_readname.txt.R1.bed.hg18	90956	31894	0.649347
./GB930123_S23/AGGTTGCT_readname.txt.R1.bed.hg18	12978	4687	0.63885
./GB930123_S23/ATGGACTG_readname.txt.R1.bed.hg18	12097	4235	0.649913
./GB930123_S23/ATGGCTGT_readname.txt.R1.bed.hg18	11337	4167	0.632442
./GB930123_S23/CAAGTCAC_readname.txt.R1.bed.hg18	30177	10660	0.646751
./GB930123_S23/CAATTCGT_readname.txt.R1.bed.hg18	38884	13588	0.65055
./GB930123_S23/CAGCTCTT_readname.txt.R1.bed.hg18	118410	42340	0.642429
./GB930123_S23/CAGTGATG_readname.txt.R1.bed.hg18	17441	6526	0.625824
./GB930123_S23/CATGTAGA_readname.txt.R1.bed.hg18	12680	4587	0.638249
./GB930123_S23/CCTAGTAG_readname.txt.R1.bed.hg18	10670	4048	0.620619
./GB930123_S23/CTGCAATC_readname.txt.R1.bed.hg18	6923	2656	0.616351
./GB930123_S23/CTTCGTTG_readname.txt.R1.bed.hg18	20500	7055	0.655854
./GB930123_S23/GACGTTAA_readname.txt.R1.bed.hg18	9078	3251	0.641881
./GB930123_S23/GGAACTGT_readname.txt.R1.bed.hg18	34361	11824	0.655889
./GB930123_S23/GGTCAATG_readname.txt.R1.bed.hg18	19757	7174	0.636888
./GB930123_S23/GTCTCCTA_readname.txt.R1.bed.hg18	39781	14219	0.642568
./GB930123_S23/GTTATATC_readname.txt.R1.bed.hg18	4882	1922	0.606309
./GB930123_S23/TAACCAAG_readname.txt.R1.bed.hg18	27133	9919	0.63443
./GB930123_S23/TACAGTGT_readname.txt.R1.bed.hg18	8518	3184	0.626203
./GB930123_S23/TACGCGTT_readname.txt.R1.bed.hg18	29750	10725	0.639496
./GB930123_S23/TCGATTAA_readname.txt.R1.bed.hg18	51638	18836	0.63523
./GB930123_S23/TCGTCGAT_readname.txt.R1.bed.hg18	30853	10655	0.654653
./GB930123_S23/TCGTTAGC_readname.txt.R1.bed.hg18	29670	9896	0.666464
./GB930124_S24/AATGACAG_readname.txt.R1.bed.hg18	25530	8848	0.653427
./GB930124_S24/ACACACGT_readname.txt.R1.bed.hg18	28697	9710	0.661637
./GB930124_S24/AGAATCAG_readname.txt.R1.bed.hg18	4923	2021	0.589478
./GB930124_S24/AGAGTTGT_readname.txt.R1.bed.hg18	12858	4522	0.648312
./GB930124_S24/AGTTGACC_readname.txt.R1.bed.hg18	31822	10696	0.66388
./GB930124_S24/ATACGACT_readname.txt.R1.bed.hg18	10870	3746	0.655382
./GB930124_S24/ATATGCTG_readname.txt.R1.bed.hg18	16562	6040	0.63531
./GB930124_S24/ATTAAGCG_readname.txt.R1.bed.hg18	4187	2018	0.518032
./GB930124_S24/CAAGGTCA_readname.txt.R1.bed.hg18	78346	25751	0.671317
./GB930124_S24/CAATGTGT_readname.txt.R1.bed.hg18	9800	3480	0.644898
./GB930124_S24/CAGCTCTT_readname.txt.R1.bed.hg18	15602	5742	0.63197
./GB930124_S24/CATAACTT_readname.txt.R1.bed.hg18	16230	5919	0.635305
./GB930124_S24/CGAGAATG_readname.txt.R1.bed.hg18	10247	3919	0.617547
./GB930124_S24/CTAAGTGT_readname.txt.R1.bed.hg18	10476	3955	0.62247
./GB930124_S24/CTGACGTT_readname.txt.R1.bed.hg18	8267	2873	0.652474
./GB930124_S24/GAGACCTT_readname.txt.R1.bed.hg18	24402	8755	0.641218
./GB930124_S24/GATAACCA_readname.txt.R1.bed.hg18	15265	5870	0.61546
./GB930124_S24/GATATTGT_readname.txt.R1.bed.hg18	13716	5035	0.63291
./GB930124_S24/TAACGTGT_readname.txt.R1.bed.hg18	8268	3072	0.628447
./GB930124_S24/TACAGTGT_readname.txt.R1.bed.hg18	111802	39767	0.644309
./GB930124_S24/TCCGGTAT_readname.txt.R1.bed.hg18	18757	6961	0.628885
./GB930124_S24/TCGATTAA_readname.txt.R1.bed.hg18	36965	12920	0.65048
./GB930124_S24/TCGTTAGC_readname.txt.R1.bed.hg18	4878	1823	0.626281
./GB930124_S24/TGAGCGAA_readname.txt.R1.bed.hg18	3738	1573	0.579187
./GB930125_S25/ACACACGT_readname.txt.R1.bed.hg18	89634	29410	0.671888
./GB930125_S25/ACGTACTC_readname.txt.R1.bed.hg18	16314	5483	0.663908
./GB930125_S25/AGAATCAG_readname.txt.R1.bed.hg18	14118	5303	0.62438
./GB930125_S25/AGGCTTGA_readname.txt.R1.bed.hg18	12617	4553	0.639138
./GB930125_S25/AGGTTGCT_readname.txt.R1.bed.hg18	20150	6931	0.65603
./GB930125_S25/ATACGACT_readname.txt.R1.bed.hg18	6671	2702	0.594963
./GB930125_S25/ATTGGCGT_readname.txt.R1.bed.hg18	29707	10219	0.656007
./GB930125_S25/CAAGGTCA_readname.txt.R1.bed.hg18	19341	6902	0.643142
./GB930125_S25/CACTCTTG_readname.txt.R1.bed.hg18	79207	26647	0.663578
./GB930125_S25/CAGCTCTT_readname.txt.R1.bed.hg18	39047	13495	0.654391
./GB930125_S25/CATGGTGT_readname.txt.R1.bed.hg18	9166	3528	0.615099
./GB930125_S25/CGAGAATG_readname.txt.R1.bed.hg18	15812	5703	0.639325
./GB930125_S25/CTAAGTGT_readname.txt.R1.bed.hg18	57075	19748	0.653999
./GB930125_S25/GACTAAGA_readname.txt.R1.bed.hg18	24344	8619	0.64595
./GB930125_S25/GAGCGATA_readname.txt.R1.bed.hg18	17062	6137	0.640312
./GB930125_S25/GATAACCA_readname.txt.R1.bed.hg18	75476	26126	0.65385
./GB930125_S25/GATATTGT_readname.txt.R1.bed.hg18	8902	3177	0.643114
./GB930125_S25/GCTTAGTA_readname.txt.R1.bed.hg18	17263	5993	0.652841
./GB930125_S25/GTCTCCTA_readname.txt.R1.bed.hg18	4517	2042	0.54793
./GB930125_S25/TACACTGT_readname.txt.R1.bed.hg18	3916	1931	0.506895
./GB930125_S25/TCCTGCTG_readname.txt.R1.bed.hg18	17903	6065	0.66123
./GB930125_S25/TGCAGACA_readname.txt.R1.bed.hg18	7654	2737	0.642409
./GB930126_S26/AACTGCCA_readname.txt.R1.bed.hg18	10447	3857	0.630803
./GB930126_S26/AATGACAG_readname.txt.R1.bed.hg18	10079	3799	0.623078
./GB930126_S26/ACGTACGT_readname.txt.R1.bed.hg18	78726	26411	0.66452
./GB930126_S26/ACTGCATG_readname.txt.R1.bed.hg18	25246	8318	0.670522
./GB930126_S26/ATGACACC_readname.txt.R1.bed.hg18	12689	4516	0.644101
./GB930126_S26/ATTAAGCG_readname.txt.R1.bed.hg18	24794	9750	0.60676
./GB930126_S26/CAATTCGT_readname.txt.R1.bed.hg18	57166	20563	0.640293
./GB930126_S26/CACAGTTG_readname.txt.R1.bed.hg18	39701	13654	0.656079
./GB930126_S26/CAGTGATG_readname.txt.R1.bed.hg18	9480	3567	0.623734
./GB930126_S26/CATGTAGA_readname.txt.R1.bed.hg18	70115	24349	0.652728
./GB930126_S26/CCTAGTAG_readname.txt.R1.bed.hg18	6638	2339	0.647635
./GB930126_S26/CGTAATTA_readname.txt.R1.bed.hg18	9214	4173	0.547102
./GB930126_S26/CTCTGATT_readname.txt.R1.bed.hg18	4238	1626	0.616328
./GB930126_S26/CTGACGTT_readname.txt.R1.bed.hg18	10250	3541	0.654537
./GB930126_S26/CTTCGTTG_readname.txt.R1.bed.hg18	6959	2523	0.637448
./GB930126_S26/GAGCGATA_readname.txt.R1.bed.hg18	9019	3448	0.617696
./GB930126_S26/GCTTAGTA_readname.txt.R1.bed.hg18	16953	6060	0.642541
./GB930126_S26/GGAACTGT_readname.txt.R1.bed.hg18	18042	6439	0.643111
./GB930126_S26/GTGAACGT_readname.txt.R1.bed.hg18	27563	9325	0.661684
./GB930126_S26/TAACCAAG_readname.txt.R1.bed.hg18	27777	9530	0.65691
./GB930126_S26/TCGTTAGC_readname.txt.R1.bed.hg18	27969	9368	0.665058
./GB930126_S26/TGAGCGAA_readname.txt.R1.bed.hg18	63085	21386	0.660997
./GB930126_S26/TTAAGCAT_readname.txt.R1.bed.hg18	8116	3021	0.627772
./GB930127_S27/AACTGCCA_readname.txt.R1.bed.hg18	4895	2081	0.574872
./GB930127_S27/AATGACAG_readname.txt.R1.bed.hg18	6901	2623	0.61991
./GB930127_S27/ACGTACTC_readname.txt.R1.bed.hg18	10196	3781	0.629168
./GB930127_S27/ACTGCATG_readname.txt.R1.bed.hg18	17865	6039	0.661965
./GB930127_S27/AGGCTTGA_readname.txt.R1.bed.hg18	52538	18319	0.651319
./GB930127_S27/AGGTTGCT_readname.txt.R1.bed.hg18	7015	2765	0.605845
./GB930127_S27/CAAGGTCA_readname.txt.R1.bed.hg18	11015	3832	0.652111
./GB930127_S27/CAATGTGT_readname.txt.R1.bed.hg18	11939	4356	0.635145
./GB930127_S27/CACAGTTG_readname.txt.R1.bed.hg18	20699	7329	0.645925
./GB930127_S27/CAGTGATG_readname.txt.R1.bed.hg18	33347	12256	0.632471
./GB930127_S27/CATAACTT_readname.txt.R1.bed.hg18	13451	4937	0.632964
./GB930127_S27/CATGGTGT_readname.txt.R1.bed.hg18	26445	9625	0.636037
./GB930127_S27/CATGTGTG_readname.txt.R1.bed.hg18	6864	2650	0.613928
./GB930127_S27/CGTAATTA_readname.txt.R1.bed.hg18	4830	2412	0.500621
./GB930127_S27/CTAGTGTG_readname.txt.R1.bed.hg18	29128	10371	0.643951
./GB930127_S27/CTGACGTT_readname.txt.R1.bed.hg18	21936	8161	0.627963
./GB930127_S27/CTGCAATC_readname.txt.R1.bed.hg18	38968	13831	0.645068
./GB930127_S27/GCTTAGTA_readname.txt.R1.bed.hg18	72521	25168	0.652956
./GB930127_S27/GGATCATC_readname.txt.R1.bed.hg18	14865	5537	0.627514
./GB930127_S27/GTTATATC_readname.txt.R1.bed.hg18	21286	7933	0.627314
./GB930127_S27/TAACCAAG_readname.txt.R1.bed.hg18	28025	9996	0.643318
./GB930127_S27/TCCGGTAT_readname.txt.R1.bed.hg18	10684	4242	0.602958
./GB930127_S27/TCTGTTGT_readname.txt.R1.bed.hg18	60991	21747	0.643439
./GB930127_S27/TGATGCGA_readname.txt.R1.bed.hg18	5901	2816	0.522793
./GB930127_S27/TTAAGCAT_readname.txt.R1.bed.hg18	13798	5216	0.621974
./GB930128_S28/AACTGCCA_readname.txt.R1.bed.hg18	56700	19563	0.654974
./GB930128_S28/AGGCTTGA_readname.txt.R1.bed.hg18	20253	6808	0.663852
./GB930128_S28/AGTTGACC_readname.txt.R1.bed.hg18	9049	3620	0.599956
./GB930128_S28/ATAGATAC_readname.txt.R1.bed.hg18	26340	9795	0.628132
./GB930128_S28/ATATGCTG_readname.txt.R1.bed.hg18	7751	2972	0.616566
./GB930128_S28/ATGGCTGT_readname.txt.R1.bed.hg18	23342	7849	0.663739
./GB930128_S28/CACTCTTG_readname.txt.R1.bed.hg18	7001	2643	0.622483
./GB930128_S28/CAGTGATG_readname.txt.R1.bed.hg18	23397	8555	0.634355
./GB930128_S28/CATGTAGA_readname.txt.R1.bed.hg18	18389	6470	0.648159
./GB930128_S28/CATGTGTG_readname.txt.R1.bed.hg18	10553	3800	0.639913
./GB930128_S28/CCTCATGT_readname.txt.R1.bed.hg18	70463	24202	0.656529
./GB930128_S28/CGATTACA_readname.txt.R1.bed.hg18	16525	5967	0.638911
./GB930128_S28/CTAGTGTG_readname.txt.R1.bed.hg18	11287	4190	0.628776
./GB930128_S28/GAGCGATA_readname.txt.R1.bed.hg18	20112	7227	0.640662
./GB930128_S28/GATAACCA_readname.txt.R1.bed.hg18	11236	4072	0.637593
./GB930128_S28/GCTTAGTA_readname.txt.R1.bed.hg18	77573	26775	0.654841
./GB930128_S28/GGTCAATG_readname.txt.R1.bed.hg18	9202	3810	0.58596
./GB930128_S28/GTACCGAT_readname.txt.R1.bed.hg18	30279	10289	0.660194
./GB930128_S28/TAACGTGT_readname.txt.R1.bed.hg18	29890	10532	0.647641
./GB930128_S28/TAAGGTGT_readname.txt.R1.bed.hg18	34903	13181	0.622353
./GB930128_S28/TACAGTGT_readname.txt.R1.bed.hg18	8967	3367	0.624512
./GB930128_S28/TAGCAGTT_readname.txt.R1.bed.hg18	13331	4724	0.645638
./GB930128_S28/TAGTTCTG_readname.txt.R1.bed.hg18	8813	3273	0.628617
./GB930128_S28/TCTACTGT_readname.txt.R1.bed.hg18	42584	15811	0.62871
./GB930128_S28/TGATGCGA_readname.txt.R1.bed.hg18	31201	10840	0.652575
./GB930129_S29/AACTGCCA_readname.txt.R1.bed.hg18	45072	16963	0.623647
./GB930129_S29/AAGAATCT_readname.txt.R1.bed.hg18	16345	6105	0.626491
./GB930129_S29/ACACACGT_readname.txt.R1.bed.hg18	17990	6141	0.658644
./GB930129_S29/ACGTACTC_readname.txt.R1.bed.hg18	37710	12540	0.667462
./GB930129_S29/AGAGTTGT_readname.txt.R1.bed.hg18	32869	11422	0.652499
./GB930129_S29/AGTTGACC_readname.txt.R1.bed.hg18	45815	15497	0.661748
./GB930129_S29/ATACGACT_readname.txt.R1.bed.hg18	15865	6092	0.61601
./GB930129_S29/ATCTGATG_readname.txt.R1.bed.hg18	79287	26831	0.661596
./GB930129_S29/ATGGCTGT_readname.txt.R1.bed.hg18	41162	13601	0.669574
./GB930129_S29/CAAGGTCA_readname.txt.R1.bed.hg18	92208	30514	0.669074
./GB930129_S29/CAGCTCTT_readname.txt.R1.bed.hg18	34565	12153	0.648402
./GB930129_S29/CAGTGATG_readname.txt.R1.bed.hg18	39850	13872	0.651895
./GB930129_S29/CATGTATT_readname.txt.R1.bed.hg18	31111	10771	0.653788
./GB930129_S29/GACTAAGA_readname.txt.R1.bed.hg18	23892	8478	0.645153
./GB930129_S29/GACTGTGT_readname.txt.R1.bed.hg18	7068	2590	0.63356
./GB930129_S29/GCGTAATT_readname.txt.R1.bed.hg18	32483	10818	0.666964
./GB930129_S29/GGAACTGT_readname.txt.R1.bed.hg18	28004	9307	0.667655
./GB930129_S29/GTGAACGT_readname.txt.R1.bed.hg18	9404	3354	0.643343
./GB930129_S29/TAACGTGT_readname.txt.R1.bed.hg18	40441	14172	0.649564
./GB930129_S29/TAGTTCTG_readname.txt.R1.bed.hg18	40738	14300	0.648976
./GB930129_S29/TCATCGTG_readname.txt.R1.bed.hg18	19493	6861	0.648027
./GB930129_S29/TCCGGTAT_readname.txt.R1.bed.hg18	8370	3147	0.624014
./GB930129_S29/TCGATTAA_readname.txt.R1.bed.hg18	18484	6293	0.659543
./GB930129_S29/TCTACTGT_readname.txt.R1.bed.hg18	18126	6692	0.630807
./GB930129_S29/TGGCGTAT_readname.txt.R1.bed.hg18	48078	17087	0.644598
./GB930130_S30/AACTGCCA_readname.txt.R1.bed.hg18	25670	8023	0.687456
./GB930130_S30/AAGAGGTT_readname.txt.R1.bed.hg18	24693	8151	0.669906
./GB930130_S30/AATGACAG_readname.txt.R1.bed.hg18	76773	25594	0.666628
./GB930130_S30/ACACACGT_readname.txt.R1.bed.hg18	44150	14324	0.675561
./GB930130_S30/AGAATCAG_readname.txt.R1.bed.hg18	8109	3465	0.572697
./GB930130_S30/AGGTTGCT_readname.txt.R1.bed.hg18	70445	23536	0.665895
./GB930130_S30/ATACGACT_readname.txt.R1.bed.hg18	5201	1879	0.638723
./GB930130_S30/ATCTGATG_readname.txt.R1.bed.hg18	17289	5625	0.674649
./GB930130_S30/ATGACTGT_readname.txt.R1.bed.hg18	50926	16708	0.671916
./GB930130_S30/CAAGGTCA_readname.txt.R1.bed.hg18	33343	10427	0.687281
./GB930130_S30/CACAGTTG_readname.txt.R1.bed.hg18	10953	4241	0.6128
./GB930130_S30/CACTCTTG_readname.txt.R1.bed.hg18	16273	5905	0.637129
./GB930130_S30/CAGCTCTT_readname.txt.R1.bed.hg18	64968	21165	0.674224
./GB930130_S30/CCTAGTAG_readname.txt.R1.bed.hg18	12551	4270	0.659788
./GB930130_S30/CCTCATGT_readname.txt.R1.bed.hg18	9002	3465	0.615086
./GB930130_S30/CTAAGTGT_readname.txt.R1.bed.hg18	32425	10582	0.673647
./GB930130_S30/CTAGTGTG_readname.txt.R1.bed.hg18	83636	28083	0.664224
./GB930130_S30/GACTAAGA_readname.txt.R1.bed.hg18	57744	18753	0.675239
./GB930130_S30/GATATTGT_readname.txt.R1.bed.hg18	21258	7283	0.6574
./GB930130_S30/GTCTCCTA_readname.txt.R1.bed.hg18	15401	5323	0.654373
./GB930130_S30/TAGTTCTG_readname.txt.R1.bed.hg18	53634	17148	0.680277
./GB930130_S30/TCATCGTG_readname.txt.R1.bed.hg18	11131	3705	0.667146
./GB930130_S30/TCCTGCTG_readname.txt.R1.bed.hg18	6787	2706	0.601297
./GB930130_S30/TCGTTAGC_readname.txt.R1.bed.hg18	20503	6696	0.673414
./GB930131_S31/ACGTACGT_readname.txt.R1.bed.hg18	15199	5210	0.657214
./GB930131_S31/ACTGCATG_readname.txt.R1.bed.hg18	71534	25376	0.64526
./GB930131_S31/AGTTGACC_readname.txt.R1.bed.hg18	78697	27357	0.652376
./GB930131_S31/ATTAAGCG_readname.txt.R1.bed.hg18	28679	11228	0.608494
./GB930131_S31/ATTGGCGT_readname.txt.R1.bed.hg18	6471	2495	0.614434
./GB930131_S31/CAAGTCAC_readname.txt.R1.bed.hg18	114914	41686	0.637242
./GB930131_S31/CACTCTTG_readname.txt.R1.bed.hg18	14974	5460	0.635368
./GB930131_S31/CAGCTCTT_readname.txt.R1.bed.hg18	41216	14599	0.645793
./GB930131_S31/CATATGCT_readname.txt.R1.bed.hg18	5494	2808	0.488897
./GB930131_S31/CATGTAGA_readname.txt.R1.bed.hg18	10746	3841	0.642565
./GB930131_S31/CGAACTAC_readname.txt.R1.bed.hg18	17726	6664	0.624055
./GB930131_S31/CGAGAATG_readname.txt.R1.bed.hg18	9497	3614	0.619459
./GB930131_S31/CTCTGATT_readname.txt.R1.bed.hg18	33796	12379	0.633714
./GB930131_S31/CTGCAATC_readname.txt.R1.bed.hg18	16842	6026	0.642204
./GB930131_S31/GGTCAATG_readname.txt.R1.bed.hg18	15029	5310	0.646683
./GB930131_S31/GTCTCCTA_readname.txt.R1.bed.hg18	1775	1628	0.0828169
./GB930131_S31/GTGAACGT_readname.txt.R1.bed.hg18	8392	3520	0.580553
./GB930131_S31/TAACCAAG_readname.txt.R1.bed.hg18	9138	3485	0.618626
./GB930131_S31/TAGACGGA_readname.txt.R1.bed.hg18	28281	9671	0.658039
./GB930131_S31/TCGTCGAT_readname.txt.R1.bed.hg18	70501	24961	0.645948
./GB930131_S31/TGATGCGA_readname.txt.R1.bed.hg18	53838	18650	0.65359
./GB930131_S31/TTAAGCAT_readname.txt.R1.bed.hg18	14468	5491	0.620473
./GB930132_S32/AATGACAG_readname.txt.R1.bed.hg18	18025	6486	0.640166
./GB930132_S32/AGAATCAG_readname.txt.R1.bed.hg18	15960	5793	0.63703
./GB930132_S32/AGGCTTGA_readname.txt.R1.bed.hg18	15524	5308	0.658078
./GB930132_S32/AGGTTGCT_readname.txt.R1.bed.hg18	31354	10938	0.651145
./GB930132_S32/ATGACTGT_readname.txt.R1.bed.hg18	16540	5799	0.649395
./GB930132_S32/CAAGTCAC_readname.txt.R1.bed.hg18	26378	9213	0.650732
./GB930132_S32/CACTCTTG_readname.txt.R1.bed.hg18	36535	12362	0.66164
./GB930132_S32/CAGCTCTT_readname.txt.R1.bed.hg18	29936	10301	0.655899
./GB930132_S32/CAGTGATG_readname.txt.R1.bed.hg18	19624	6954	0.645638
./GB930132_S32/CATATGCT_readname.txt.R1.bed.hg18	6598	3919	0.406032
./GB930132_S32/CATGTATT_readname.txt.R1.bed.hg18	105065	36276	0.654728
./GB930132_S32/CGTAATTA_readname.txt.R1.bed.hg18	5192	3307	0.363059
./GB930132_S32/CTAGTGTG_readname.txt.R1.bed.hg18	22424	7755	0.654165
./GB930132_S32/CTGCAATC_readname.txt.R1.bed.hg18	44904	14647	0.673815
./GB930132_S32/CTTCGTTG_readname.txt.R1.bed.hg18	70673	23410	0.668756
./GB930132_S32/GACTAAGA_readname.txt.R1.bed.hg18	23630	8357	0.646339
./GB930132_S32/GATATTGT_readname.txt.R1.bed.hg18	62032	21023	0.661094
./GB930132_S32/GTACCGAT_readname.txt.R1.bed.hg18	10517	3745	0.64391
./GB930132_S32/TACGCGTT_readname.txt.R1.bed.hg18	16514	5892	0.643212
./GB930132_S32/TAGTTCTG_readname.txt.R1.bed.hg18	54742	19775	0.63876
./GB930132_S32/TCAGCTTG_readname.txt.R1.bed.hg18	36322	13429	0.630279
./GB930132_S32/TCCGGTAT_readname.txt.R1.bed.hg18	27045	9296	0.656277
./GB930132_S32/TCGATTAA_readname.txt.R1.bed.hg18	49841	16876	0.661403
./GB930132_S32/TCTGTTGT_readname.txt.R1.bed.hg18	26313	9178	0.651199
./GB930132_S32/TGGCGTAT_readname.txt.R1.bed.hg18	42912	15004	0.650354
./GB930133_S33/AACTGCCA_readname.txt.R1.bed.hg18	113606	40760	0.641216
./GB930133_S33/AATCGGAT_readname.txt.R1.bed.hg18	7520	2948	0.607979
./GB930133_S33/AATGACAG_readname.txt.R1.bed.hg18	7797	3196	0.590099
./GB930133_S33/AGGCTTGA_readname.txt.R1.bed.hg18	253406	93416	0.631358
./GB930133_S33/AGTTGACC_readname.txt.R1.bed.hg18	8759	3369	0.615367
./GB930133_S33/ATAGATAC_readname.txt.R1.bed.hg18	32627	12563	0.614951
./GB930133_S33/ATATGCTG_readname.txt.R1.bed.hg18	47291	18614	0.606394
./GB930133_S33/ATGACTGT_readname.txt.R1.bed.hg18	12877	5570	0.567446
./GB930133_S33/ATTAAGCG_readname.txt.R1.bed.hg18	20525	8600	0.580999
./GB930133_S33/CACAGTTG_readname.txt.R1.bed.hg18	20763	7811	0.623802
./GB930133_S33/CATAACTT_readname.txt.R1.bed.hg18	22854	9196	0.59762
./GB930133_S33/CCTCATGT_readname.txt.R1.bed.hg18	10776	4134	0.61637
./GB930133_S33/CGAACTAC_readname.txt.R1.bed.hg18	59083	22881	0.612731
./GB930133_S33/CTCTGATT_readname.txt.R1.bed.hg18	4555	1849	0.594072
./GB930133_S33/CTGACGTT_readname.txt.R1.bed.hg18	57193	20675	0.638505
./GB930133_S33/TAACGTGT_readname.txt.R1.bed.hg18	11887	4593	0.613612
./GB930133_S33/TAGCAGTT_readname.txt.R1.bed.hg18	128519	47563	0.629915
./GB930133_S33/TCAAGTTG_readname.txt.R1.bed.hg18	42091	15619	0.628923
./GB930133_S33/TCATCGTG_readname.txt.R1.bed.hg18	68692	25145	0.633946
./GB930133_S33/TCCTGCTG_readname.txt.R1.bed.hg18	12433	4592	0.63066
./GB930133_S33/TCGATTAA_readname.txt.R1.bed.hg18	7700	3025	0.607143
./GB930133_S33/TCTACTGT_readname.txt.R1.bed.hg18	11338	4461	0.606544
./GB930133_S33/TGAGCGAA_readname.txt.R1.bed.hg18	34270	12649	0.630902
./GB930133_S33/TGATGCGA_readname.txt.R1.bed.hg18	6494	2813	0.566831
./GB930133_S33/TTCACGAT_readname.txt.R1.bed.hg18	32342	11978	0.629646
./GB930134_S34/AAGAGGTT_readname.txt.R1.bed.hg18	7644	2818	0.631345
./GB930134_S34/AATGACAG_readname.txt.R1.bed.hg18	3368	1877	0.442696
./GB930134_S34/AGAGTTGT_readname.txt.R1.bed.hg18	22858	7694	0.6634
./GB930134_S34/AGGCTTGA_readname.txt.R1.bed.hg18	32148	10800	0.664054
./GB930134_S34/ATATGCTG_readname.txt.R1.bed.hg18	9001	3249	0.63904
./GB930134_S34/ATGGACTG_readname.txt.R1.bed.hg18	35286	11877	0.663408
./GB930134_S34/CAAGATAT_readname.txt.R1.bed.hg18	97826	33900	0.653466
./GB930134_S34/CATGGTGT_readname.txt.R1.bed.hg18	6386	2509	0.607109
./GB930134_S34/CATGTATT_readname.txt.R1.bed.hg18	23117	7936	0.656703
./GB930134_S34/CGATTACA_readname.txt.R1.bed.hg18	5465	1946	0.643916
./GB930134_S34/CTAAGTGT_readname.txt.R1.bed.hg18	9502	3600	0.621132
./GB930134_S34/GAGACCTT_readname.txt.R1.bed.hg18	202221	68302	0.662241
./GB930134_S34/GATATTGT_readname.txt.R1.bed.hg18	18942	6740	0.644177
./GB930134_S34/GTACCGAT_readname.txt.R1.bed.hg18	17211	6078	0.646854
./GB930134_S34/GTTATATC_readname.txt.R1.bed.hg18	11465	4091	0.643175
./GB930134_S34/TAACCAAG_readname.txt.R1.bed.hg18	48265	17129	0.645105
./GB930134_S34/TACACTGT_readname.txt.R1.bed.hg18	18506	6497	0.648925
./GB930134_S34/TAGACGGA_readname.txt.R1.bed.hg18	13764	5007	0.636225
./GB930134_S34/TAGTTCTG_readname.txt.R1.bed.hg18	9287	3408	0.633035
./GB930134_S34/TCAAGTTG_readname.txt.R1.bed.hg18	34618	12642	0.634814
./GB930134_S34/TCTACTGT_readname.txt.R1.bed.hg18	11654	4485	0.615154
./GB930134_S34/TGGCGTAT_readname.txt.R1.bed.hg18	19826	7052	0.644305
./GB930134_S34/TTAAGCAT_readname.txt.R1.bed.hg18	37743	13140	0.651856
./GB930134_S34/TTCACGAT_readname.txt.R1.bed.hg18	31103	10670	0.656946
./GB930135_S35/AAGAGGTT_readname.txt.R1.bed.hg18	7794	3043	0.609571
./GB930135_S35/ACGTACTC_readname.txt.R1.bed.hg18	51049	17953	0.648318
./GB930135_S35/ACTGCATG_readname.txt.R1.bed.hg18	4793	2011	0.58043
./GB930135_S35/ATGACACC_readname.txt.R1.bed.hg18	43039	15752	0.634006
./GB930135_S35/ATGGCTGT_readname.txt.R1.bed.hg18	6016	2372	0.605718
./GB930135_S35/ATTGGCGT_readname.txt.R1.bed.hg18	27751	10331	0.627725
./GB930135_S35/CAAGATAT_readname.txt.R1.bed.hg18	5977	2245	0.624394
./GB930135_S35/CAAGTCAC_readname.txt.R1.bed.hg18	17003	6263	0.631653
./GB930135_S35/CAATGTGT_readname.txt.R1.bed.hg18	8005	3217	0.598126
./GB930135_S35/CAGCTCTT_readname.txt.R1.bed.hg18	11463	4366	0.619122
./GB930135_S35/CAGTGATG_readname.txt.R1.bed.hg18	56072	20003	0.643262
./GB930135_S35/CATGGTGT_readname.txt.R1.bed.hg18	9949	3869	0.611117
./GB930135_S35/CATGTGTG_readname.txt.R1.bed.hg18	35926	13162	0.633636
./GB930135_S35/CTAAGTGT_readname.txt.R1.bed.hg18	25305	9602	0.620549
./GB930135_S35/CTAGTGTG_readname.txt.R1.bed.hg18	61418	23181	0.62257
./GB930135_S35/CTTCGTTG_readname.txt.R1.bed.hg18	11890	4649	0.608999
./GB930135_S35/GAGCGATA_readname.txt.R1.bed.hg18	48078	17968	0.626274
./GB930135_S35/GATATTGT_readname.txt.R1.bed.hg18	7466	3029	0.594294
./GB930135_S35/TAGTTCTG_readname.txt.R1.bed.hg18	40856	14995	0.632979
./GB930136_S36/AACTGCCA_readname.txt.R1.bed.hg18	1763	1554	0.118548
./GB930136_S36/AATGACAG_readname.txt.R1.bed.hg18	44111	16368	0.628936
./GB930136_S36/ACACACGT_readname.txt.R1.bed.hg18	49715	17195	0.654129
./GB930136_S36/ACGTACGT_readname.txt.R1.bed.hg18	11423	4008	0.649129
./GB930136_S36/ATCTGATG_readname.txt.R1.bed.hg18	23255	8025	0.654913
./GB930136_S36/ATGGACTG_readname.txt.R1.bed.hg18	10757	4446	0.586688
./GB930136_S36/ATTGGCGT_readname.txt.R1.bed.hg18	7023	2838	0.595899
./GB930136_S36/CAGTGATG_readname.txt.R1.bed.hg18	64319	22204	0.654783
./GB930136_S36/CATGGTGT_readname.txt.R1.bed.hg18	8821	3236	0.633148
./GB930136_S36/CATGTAGA_readname.txt.R1.bed.hg18	11941	4217	0.646847
./GB930136_S36/CTAGTGTG_readname.txt.R1.bed.hg18	9092	3365	0.629894
./GB930136_S36/GAGACCTT_readname.txt.R1.bed.hg18	12589	4442	0.647152
./GB930136_S36/GATAACCA_readname.txt.R1.bed.hg18	153486	54313	0.646137
./GB930136_S36/GATATTGT_readname.txt.R1.bed.hg18	60026	20411	0.659964
./GB930136_S36/GTACCGAT_readname.txt.R1.bed.hg18	6114	2301	0.623651
./GB930136_S36/TAACCAAG_readname.txt.R1.bed.hg18	55355	19800	0.642309
./GB930136_S36/TAACGTGT_readname.txt.R1.bed.hg18	11401	4718	0.586177
./GB930136_S36/TACACTGT_readname.txt.R1.bed.hg18	27099	9171	0.661574
./GB930136_S36/TCAAGTTG_readname.txt.R1.bed.hg18	109743	37028	0.662594
./GB930136_S36/TCGATTAA_readname.txt.R1.bed.hg18	119278	42164	0.646506
./GB930136_S36/TCGTCGAT_readname.txt.R1.bed.hg18	18535	6651	0.641165
./GB930136_S36/TCGTTAGC_readname.txt.R1.bed.hg18	32079	11034	0.656037
./GB930136_S36/TCTGTTGT_readname.txt.R1.bed.hg18	109091	37919	0.652409
./GB930136_S36/TGAGCGAA_readname.txt.R1.bed.hg18	26382	9429	0.642597
./GB930141_S41/AAGAGGTT_readname.txt.R1.bed.hg18	5985	2537	0.576107
./GB930141_S41/AATGACAG_readname.txt.R1.bed.hg18	9667	4097	0.576187
./GB930141_S41/ACACACGT_readname.txt.R1.bed.hg18	14536	5644	0.611723
./GB930141_S41/ACGTACGT_readname.txt.R1.bed.hg18	4483	2128	0.525318
./GB930141_S41/AGGTTGCT_readname.txt.R1.bed.hg18	12065	5266	0.563531
./GB930141_S41/ATAGATAC_readname.txt.R1.bed.hg18	26063	10691	0.589802
./GB930141_S41/CAAGTCAC_readname.txt.R1.bed.hg18	7366	3185	0.567608
./GB930141_S41/CAATGTGT_readname.txt.R1.bed.hg18	22180	9637	0.565509
./GB930141_S41/CAATTCGT_readname.txt.R1.bed.hg18	34174	14112	0.587054
./GB930141_S41/CACAGTTG_readname.txt.R1.bed.hg18	55517	22319	0.597979
./GB930141_S41/CACTCTTG_readname.txt.R1.bed.hg18	11441	5137	0.551001
./GB930141_S41/CGAACTAC_readname.txt.R1.bed.hg18	9423	4088	0.566168
./GB930141_S41/CTCTGATT_readname.txt.R1.bed.hg18	5852	2596	0.556391
./GB930141_S41/GACGTTAA_readname.txt.R1.bed.hg18	5324	2302	0.567618
./GB930141_S41/GATATTGT_readname.txt.R1.bed.hg18	17568	7322	0.583219
./GB930141_S41/GATGGCTT_readname.txt.R1.bed.hg18	43875	18201	0.585162
./GB930141_S41/GCTTAGTA_readname.txt.R1.bed.hg18	15680	6473	0.587181
./GB930141_S41/GTACCGAT_readname.txt.R1.bed.hg18	49976	20004	0.599728
./GB930141_S41/GTGAACGT_readname.txt.R1.bed.hg18	10197	4187	0.589389
./GB930141_S41/TCGTCGAT_readname.txt.R1.bed.hg18	12616	5367	0.574588
./GB930141_S41/TCTGTTGT_readname.txt.R1.bed.hg18	1659	1525	0.0807715
./GB930141_S41/TGAGCGAA_readname.txt.R1.bed.hg18	12067	5108	0.576697
./GB930144_S44/ACACACGT_readname.txt.R1.bed.hg18	45274	15106	0.666343
./GB930144_S44/ACGTACGT_readname.txt.R1.bed.hg18	4793	1828	0.61861
./GB930144_S44/AGGTTGCT_readname.txt.R1.bed.hg18	2528	2305	0.088212
./GB930144_S44/AGTTGACC_readname.txt.R1.bed.hg18	14175	5096	0.640494
./GB930144_S44/ATACGACT_readname.txt.R1.bed.hg18	12815	4540	0.645728
./GB930144_S44/ATAGATAC_readname.txt.R1.bed.hg18	14069	5081	0.638851
./GB930144_S44/ATGACACC_readname.txt.R1.bed.hg18	10659	4128	0.612722
./GB930144_S44/CAATGTGT_readname.txt.R1.bed.hg18	17015	6025	0.645901
./GB930144_S44/CAATTCGT_readname.txt.R1.bed.hg18	77179	26672	0.654414
./GB930144_S44/CAGTGATG_readname.txt.R1.bed.hg18	5781	3053	0.471891
./GB930144_S44/CATGGTGT_readname.txt.R1.bed.hg18	160153	57499	0.640975
./GB930144_S44/CATGTATT_readname.txt.R1.bed.hg18	40549	13461	0.668031
./GB930144_S44/CGAACTAC_readname.txt.R1.bed.hg18	15072	5295	0.648686
./GB930144_S44/GACGTTAA_readname.txt.R1.bed.hg18	6452	2386	0.630192
./GB930144_S44/GACTAAGA_readname.txt.R1.bed.hg18	9048	3573	0.605106
./GB930144_S44/GATATTGT_readname.txt.R1.bed.hg18	38614	13291	0.655798
./GB930144_S44/GGAACTGT_readname.txt.R1.bed.hg18	11779	4666	0.603871
./GB930144_S44/GTGAACGT_readname.txt.R1.bed.hg18	55677	18847	0.661494
./GB930144_S44/TAACGTGT_readname.txt.R1.bed.hg18	10982	4377	0.601439
./GB930144_S44/TACACTGT_readname.txt.R1.bed.hg18	27246	9197	0.662446
./GB930144_S44/TCATCGTG_readname.txt.R1.bed.hg18	11438	4039	0.646879
./GB930144_S44/TCCTGCTG_readname.txt.R1.bed.hg18	21828	7467	0.657916
./GB930144_S44/TCGATTAA_readname.txt.R1.bed.hg18	29283	10210	0.651334
./GB930144_S44/TCGTCGAT_readname.txt.R1.bed.hg18	73139	24261	0.668289
./GB930144_S44/TGGCGTAT_readname.txt.R1.bed.hg18	48493	16366	0.662508
./GB930149_S49/AACTGCCA_readname.txt.R1.bed.hg18	50552	17768	0.64852
./GB930149_S49/AAGAATCT_readname.txt.R1.bed.hg18	11680	4453	0.61875
./GB930149_S49/AGGTTGCT_readname.txt.R1.bed.hg18	31885	11408	0.642214
./GB930149_S49/ATAGATAC_readname.txt.R1.bed.hg18	50280	17744	0.647096
./GB930149_S49/ATGACTGT_readname.txt.R1.bed.hg18	4390	1836	0.581777
./GB930149_S49/ATTAAGCG_readname.txt.R1.bed.hg18	13150	5134	0.609582
./GB930149_S49/CAAGTCAC_readname.txt.R1.bed.hg18	9311	3420	0.632693
./GB930149_S49/CATGTATT_readname.txt.R1.bed.hg18	3282	1548	0.528336
./GB930149_S49/CCTCATGT_readname.txt.R1.bed.hg18	27956	9656	0.6546
./GB930149_S49/CTAAGTGT_readname.txt.R1.bed.hg18	16442	6016	0.634108
./GB930149_S49/GACGTTAA_readname.txt.R1.bed.hg18	18647	6425	0.655441
./GB930149_S49/GACTAAGA_readname.txt.R1.bed.hg18	51720	17871	0.654466
./GB930149_S49/GAGCGATA_readname.txt.R1.bed.hg18	39349	14066	0.642532
./GB930149_S49/GATAACCA_readname.txt.R1.bed.hg18	6317	2482	0.607092
./GB930149_S49/GATGGCTT_readname.txt.R1.bed.hg18	23224	8212	0.6464
./GB930149_S49/GGAACTGT_readname.txt.R1.bed.hg18	52212	18478	0.646097
./GB930149_S49/TAACGTGT_readname.txt.R1.bed.hg18	56026	19499	0.651965
./GB930149_S49/TAGACGGA_readname.txt.R1.bed.hg18	14600	5233	0.641575
./GB930149_S49/TCAAGTTG_readname.txt.R1.bed.hg18	6850	2617	0.617956
./GB930149_S49/TCGTCGAT_readname.txt.R1.bed.hg18	9495	3498	0.631596
./GB930149_S49/TGATGCGA_readname.txt.R1.bed.hg18	29832	10155	0.659594
./GB930149_S49/TTAAGCAT_readname.txt.R1.bed.hg18	10250	3902	0.619317
./GB930150_S50/AATGACAG_readname.txt.R1.bed.hg18	5271	2172	0.587934
./GB930150_S50/AGGTTGCT_readname.txt.R1.bed.hg18	7091	2620	0.630518
./GB930150_S50/AGTTGACC_readname.txt.R1.bed.hg18	17037	5804	0.65933
./GB930150_S50/ATAGATAC_readname.txt.R1.bed.hg18	8075	3034	0.624272
./GB930150_S50/ATCTGATG_readname.txt.R1.bed.hg18	23671	8282	0.65012
./GB930150_S50/ATGGACTG_readname.txt.R1.bed.hg18	4789	1813	0.621424
./GB930150_S50/ATGGCTGT_readname.txt.R1.bed.hg18	83698	27960	0.665942
./GB930150_S50/ATTGGCGT_readname.txt.R1.bed.hg18	61550	22019	0.642258
./GB930150_S50/CAAGGTCA_readname.txt.R1.bed.hg18	52099	17876	0.656884
./GB930150_S50/CAAGTCAC_readname.txt.R1.bed.hg18	31720	10556	0.667213
./GB930150_S50/CAATGTGT_readname.txt.R1.bed.hg18	35877	12053	0.664047
./GB930150_S50/CATAACTT_readname.txt.R1.bed.hg18	66410	22194	0.665803
./GB930150_S50/CATGGTGT_readname.txt.R1.bed.hg18	10681	3856	0.638985
./GB930150_S50/CTAAGTGT_readname.txt.R1.bed.hg18	11051	4068	0.631889
./GB930150_S50/CTCTGATT_readname.txt.R1.bed.hg18	11159	3925	0.648266
./GB930150_S50/CTGCAATC_readname.txt.R1.bed.hg18	47988	16885	0.648141
./GB930150_S50/GAGACCTT_readname.txt.R1.bed.hg18	11845	4045	0.658506
./GB930150_S50/GAGCGATA_readname.txt.R1.bed.hg18	10495	4080	0.611243
./GB930150_S50/GTTATATC_readname.txt.R1.bed.hg18	43139	14909	0.654396
./GB930150_S50/TAACCAAG_readname.txt.R1.bed.hg18	6376	2354	0.630803
./GB930150_S50/TAAGGTGT_readname.txt.R1.bed.hg18	29910	10801	0.638883
./GB930150_S50/TCATCGTG_readname.txt.R1.bed.hg18	20346	7099	0.651086
./GB930150_S50/TGAGCGAA_readname.txt.R1.bed.hg18	46257	15401	0.667056
./GB930150_S50/TTAAGCAT_readname.txt.R1.bed.hg18	74900	25725	0.656542
./GB930150_S50/TTCACGAT_readname.txt.R1.bed.hg18	9521	3458	0.636803
./GB930151_S51/AATCGGAT_readname.txt.R1.bed.hg18	10114	3605	0.643563
./GB930151_S51/AATGACAG_readname.txt.R1.bed.hg18	3702	1635	0.558347
./GB930151_S51/AGAATCAG_readname.txt.R1.bed.hg18	10595	4289	0.595186
./GB930151_S51/ATGACTGT_readname.txt.R1.bed.hg18	18608	7027	0.622367
./GB930151_S51/ATGGCTGT_readname.txt.R1.bed.hg18	21183	8118	0.616768
./GB930151_S51/ATTGGCGT_readname.txt.R1.bed.hg18	32531	11915	0.633734
./GB930151_S51/CAAGTCAC_readname.txt.R1.bed.hg18	11387	4178	0.63309
./GB930151_S51/CAGTGATG_readname.txt.R1.bed.hg18	27498	9935	0.638701
./GB930151_S51/CATAACTT_readname.txt.R1.bed.hg18	28832	10453	0.637451
./GB930151_S51/CATGTATT_readname.txt.R1.bed.hg18	23456	8272	0.64734
./GB930151_S51/CATGTGTG_readname.txt.R1.bed.hg18	34977	12619	0.63922
./GB930151_S51/GAGCGATA_readname.txt.R1.bed.hg18	5827	2316	0.60254
./GB930151_S51/GATAACCA_readname.txt.R1.bed.hg18	63503	23234	0.634128
./GB930151_S51/GATGGCTT_readname.txt.R1.bed.hg18	10950	4277	0.609406
./GB930151_S51/GGTCAATG_readname.txt.R1.bed.hg18	20521	7230	0.647678
./GB930151_S51/GTTATATC_readname.txt.R1.bed.hg18	16043	6055	0.622577
./GB930151_S51/TACGCGTT_readname.txt.R1.bed.hg18	21491	8100	0.623098
./GB930151_S51/TCATCGTG_readname.txt.R1.bed.hg18	9986	3712	0.62828
./GB930151_S51/TCTACTGT_readname.txt.R1.bed.hg18	115666	41722	0.639289
./GB930151_S51/TGATGCGA_readname.txt.R1.bed.hg18	34477	12273	0.644024
./GB930151_S51/TGGCGTAT_readname.txt.R1.bed.hg18	5907	2216	0.624852
./GB930151_S51/TTAAGCAT_readname.txt.R1.bed.hg18	61854	23147	0.62578
./GB930152_S52/AAGAATCT_readname.txt.R1.bed.hg18	13125	4826	0.632305
./GB930152_S52/ACACACGT_readname.txt.R1.bed.hg18	75968	25703	0.66166
./GB930152_S52/ACGTACGT_readname.txt.R1.bed.hg18	25080	8403	0.664952
./GB930152_S52/AGAGTTGT_readname.txt.R1.bed.hg18	18756	6573	0.649552
./GB930152_S52/AGCAATCC_readname.txt.R1.bed.hg18	7307	2583	0.646503
./GB930152_S52/AGTTGACC_readname.txt.R1.bed.hg18	36098	12436	0.655493
./GB930152_S52/ATATGCTG_readname.txt.R1.bed.hg18	6432	2957	0.540267
./GB930152_S52/ATGACACC_readname.txt.R1.bed.hg18	12637	4497	0.64414
./GB930152_S52/ATGACTGT_readname.txt.R1.bed.hg18	22775	8558	0.624237
./GB930152_S52/ATGGACTG_readname.txt.R1.bed.hg18	51274	18128	0.646448
./GB930152_S52/CAAGATAT_readname.txt.R1.bed.hg18	16845	5782	0.656753
./GB930152_S52/CAAGTCAC_readname.txt.R1.bed.hg18	16335	6440	0.605755
./GB930152_S52/CAGTGATG_readname.txt.R1.bed.hg18	8591	3373	0.60738
./GB930152_S52/CATGTAGA_readname.txt.R1.bed.hg18	11814	4328	0.633655
./GB930152_S52/CATGTATT_readname.txt.R1.bed.hg18	10834	4037	0.627377
./GB930152_S52/CGATTACA_readname.txt.R1.bed.hg18	6774	2525	0.627251
./GB930152_S52/CTGCAATC_readname.txt.R1.bed.hg18	6112	2868	0.530759
./GB930152_S52/GACTAAGA_readname.txt.R1.bed.hg18	43529	14976	0.655954
./GB930152_S52/GACTGTGT_readname.txt.R1.bed.hg18	35744	13416	0.624664
./GB930152_S52/GAGCGATA_readname.txt.R1.bed.hg18	17991	6613	0.632427
./GB930152_S52/GTCTCCTA_readname.txt.R1.bed.hg18	38946	14101	0.637935
./GB930152_S52/TCAAGTTG_readname.txt.R1.bed.hg18	11516	4287	0.627735
./GB930152_S52/TCGTCGAT_readname.txt.R1.bed.hg18	13575	4945	0.635727
./GB930152_S52/TGAGCGAA_readname.txt.R1.bed.hg18	27125	9409	0.653124
./GB930152_S52/TGATGCGA_readname.txt.R1.bed.hg18	8191	3196	0.609816
./GB930153_S53/AAGAGGTT_readname.txt.R1.bed.hg18	31261	10248	0.672179
./GB930153_S53/ATGACACC_readname.txt.R1.bed.hg18	54444	18766	0.655316
./GB930153_S53/ATGACTGT_readname.txt.R1.bed.hg18	117179	40326	0.65586
./GB930153_S53/ATTAAGCG_readname.txt.R1.bed.hg18	12631	5018	0.602723
./GB930153_S53/CAATTCGT_readname.txt.R1.bed.hg18	81021	27621	0.659088
./GB930153_S53/CACTCTTG_readname.txt.R1.bed.hg18	4943	2441	0.50617
./GB930153_S53/CAGTGATG_readname.txt.R1.bed.hg18	16153	5649	0.650282
./GB930153_S53/CATATGCT_readname.txt.R1.bed.hg18	9679	5435	0.438475
./GB930153_S53/CTAAGTGT_readname.txt.R1.bed.hg18	62531	22075	0.646975
./GB930153_S53/CTAGTGTG_readname.txt.R1.bed.hg18	13304	4757	0.642438
./GB930153_S53/CTTCGTTG_readname.txt.R1.bed.hg18	16142	5581	0.654256
./GB930153_S53/GACTGTGT_readname.txt.R1.bed.hg18	7436	2785	0.625471
./GB930153_S53/GAGCGATA_readname.txt.R1.bed.hg18	36015	12788	0.644926
./GB930153_S53/GATATTGT_readname.txt.R1.bed.hg18	4657	1925	0.586644
./GB930153_S53/GATGGCTT_readname.txt.R1.bed.hg18	86689	29743	0.6569
./GB930153_S53/GGATCATC_readname.txt.R1.bed.hg18	10102	3528	0.650762
./GB930153_S53/GTGAACGT_readname.txt.R1.bed.hg18	5175	2053	0.603285
./GB930153_S53/TAGTTCTG_readname.txt.R1.bed.hg18	32101	11396	0.644995
./GB930153_S53/TCAAGTTG_readname.txt.R1.bed.hg18	46525	15720	0.662117
./GB930153_S53/TCATCGTG_readname.txt.R1.bed.hg18	26665	9261	0.652691
./GB930153_S53/TCCTGCTG_readname.txt.R1.bed.hg18	12309	4296	0.650987
./GB930153_S53/TGAGCGAA_readname.txt.R1.bed.hg18	19842	6542	0.670295
./GB930153_S53/TGATGCGA_readname.txt.R1.bed.hg18	21789	7691	0.647024
./GB930153_S53/TTCACGAT_readname.txt.R1.bed.hg18	16326	5603	0.656805
./GB930154_S54/ACTGCATG_readname.txt.R1.bed.hg18	7079	2812	0.602769
./GB930154_S54/AGAATCAG_readname.txt.R1.bed.hg18	38766	15942	0.588763
./GB930154_S54/AGTTGACC_readname.txt.R1.bed.hg18	28180	11171	0.603584
./GB930154_S54/ATCTGATG_readname.txt.R1.bed.hg18	15168	6353	0.581158
./GB930154_S54/ATGACTGT_readname.txt.R1.bed.hg18	5589	2246	0.598139
./GB930154_S54/ATTAAGCG_readname.txt.R1.bed.hg18	15094	6761	0.552074
./GB930154_S54/CAATGTGT_readname.txt.R1.bed.hg18	10574	4235	0.599489
./GB930154_S54/CATGTATT_readname.txt.R1.bed.hg18	11430	4743	0.585039
./GB930154_S54/CGAACTAC_readname.txt.R1.bed.hg18	9677	4070	0.579415
./GB930154_S54/CGATTACA_readname.txt.R1.bed.hg18	30028	12208	0.593446
./GB930154_S54/CTTCGTTG_readname.txt.R1.bed.hg18	17827	7188	0.596791
./GB930154_S54/GATATTGT_readname.txt.R1.bed.hg18	15978	6435	0.597259
./GB930154_S54/GCTTAGTA_readname.txt.R1.bed.hg18	5859	2544	0.565796
./GB930154_S54/GGAACTGT_readname.txt.R1.bed.hg18	8376	3440	0.589303
./GB930154_S54/GGTCAATG_readname.txt.R1.bed.hg18	46772	18875	0.596447
./GB930154_S54/GTTATATC_readname.txt.R1.bed.hg18	43749	18618	0.574436
./GB930154_S54/TAAGGTGT_readname.txt.R1.bed.hg18	30957	12505	0.596053
./GB930154_S54/TAGACGGA_readname.txt.R1.bed.hg18	23207	9196	0.60374
./GB930154_S54/TAGCAGTT_readname.txt.R1.bed.hg18	12246	5080	0.585171
./GB930154_S54/TCCTGCTG_readname.txt.R1.bed.hg18	27962	11201	0.599421
./GB930154_S54/TCGTCGAT_readname.txt.R1.bed.hg18	6659	2756	0.586124
./GB930154_S54/TCTACTGT_readname.txt.R1.bed.hg18	7338	3125	0.574135
./GB930154_S54/TGATGCGA_readname.txt.R1.bed.hg18	18804	7289	0.61237
./GB930155_S55/AAGAATCT_readname.txt.R1.bed.hg18	30962	11031	0.643725
./GB930155_S55/ACGTACTC_readname.txt.R1.bed.hg18	9973	3608	0.638223
./GB930155_S55/AGGTTGCT_readname.txt.R1.bed.hg18	11235	3986	0.645216
./GB930155_S55/ATACGACT_readname.txt.R1.bed.hg18	9044	3273	0.638103
./GB930155_S55/ATGACTGT_readname.txt.R1.bed.hg18	7957	3259	0.590424
./GB930155_S55/CAAGATAT_readname.txt.R1.bed.hg18	10826	4091	0.622113
./GB930155_S55/CAAGTCAC_readname.txt.R1.bed.hg18	84566	29273	0.653844
./GB930155_S55/CATGTATT_readname.txt.R1.bed.hg18	32007	11077	0.653919
./GB930155_S55/CTAGTGTG_readname.txt.R1.bed.hg18	44808	15419	0.655887
./GB930155_S55/CTGACGTT_readname.txt.R1.bed.hg18	61295	21117	0.655486
./GB930155_S55/GACGTTAA_readname.txt.R1.bed.hg18	32094	10617	0.669191
./GB930155_S55/GACTGTGT_readname.txt.R1.bed.hg18	30782	11092	0.63966
./GB930155_S55/GATATTGT_readname.txt.R1.bed.hg18	25039	8752	0.650465
./GB930155_S55/GGTCAATG_readname.txt.R1.bed.hg18	7010	2673	0.618688
./GB930155_S55/GTACCGAT_readname.txt.R1.bed.hg18	5591	2140	0.617242
./GB930155_S55/GTTATATC_readname.txt.R1.bed.hg18	16815	6135	0.635147
./GB930155_S55/TACAGTGT_readname.txt.R1.bed.hg18	10174	3689	0.637409
./GB930155_S55/TACGCGTT_readname.txt.R1.bed.hg18	23517	8185	0.651954
./GB930155_S55/TAGACGGA_readname.txt.R1.bed.hg18	17554	6180	0.647943
./GB930155_S55/TCGATTAA_readname.txt.R1.bed.hg18	18981	6545	0.655181
./GB930155_S55/TGATGCGA_readname.txt.R1.bed.hg18	7492	2829	0.622397
./GB930155_S55/TGGCGTAT_readname.txt.R1.bed.hg18	31999	10999	0.656271
./GB930155_S55/TTAAGCAT_readname.txt.R1.bed.hg18	40311	13703	0.660068
./GB930156_S56/AACTGCCA_readname.txt.R1.bed.hg18	21037	7235	0.656082
./GB930156_S56/AAGAGGTT_readname.txt.R1.bed.hg18	40270	13566	0.663124
./GB930156_S56/AATCGGAT_readname.txt.R1.bed.hg18	22193	7728	0.651782
./GB930156_S56/ATGACTGT_readname.txt.R1.bed.hg18	12165	4295	0.646938
./GB930156_S56/ATGGACTG_readname.txt.R1.bed.hg18	5403	2036	0.623172
./GB930156_S56/ATTGGCGT_readname.txt.R1.bed.hg18	15402	5526	0.641215
./GB930156_S56/CAATGTGT_readname.txt.R1.bed.hg18	7969	3120	0.608483
./GB930156_S56/CACAGTTG_readname.txt.R1.bed.hg18	20507	7276	0.645194
./GB930156_S56/CAGCTCTT_readname.txt.R1.bed.hg18	36084	12670	0.648875
./GB930156_S56/CATATGCT_readname.txt.R1.bed.hg18	10777	6464	0.400204
./GB930156_S56/CATGGTGT_readname.txt.R1.bed.hg18	22358	7879	0.647598
./GB930156_S56/CATGTAGA_readname.txt.R1.bed.hg18	16689	5703	0.658278
./GB930156_S56/CATGTGTG_readname.txt.R1.bed.hg18	7533	2657	0.647285
./GB930156_S56/GAGCGATA_readname.txt.R1.bed.hg18	9145	3461	0.621542
./GB930156_S56/GTCTCCTA_readname.txt.R1.bed.hg18	6799	2801	0.588028
./GB930156_S56/GTTATATC_readname.txt.R1.bed.hg18	26091	9637	0.630639
./GB930156_S56/TAACGTGT_readname.txt.R1.bed.hg18	7154	2631	0.632234
./GB930156_S56/TAAGGTGT_readname.txt.R1.bed.hg18	6473	2389	0.630928
./GB930156_S56/TAGACGGA_readname.txt.R1.bed.hg18	37964	13150	0.653619
./GB930156_S56/TCAAGTTG_readname.txt.R1.bed.hg18	30224	11019	0.635422
./GB930156_S56/TCGATTAA_readname.txt.R1.bed.hg18	58388	20461	0.649568
./GB930156_S56/TGAGCGAA_readname.txt.R1.bed.hg18	29683	10122	0.658997
./GB930156_S56/TGATGCGA_readname.txt.R1.bed.hg18	4737	1896	0.599747
./GB930156_S56/TGGCGTAT_readname.txt.R1.bed.hg18	21554	8729	0.595017
./GB930157_S57/ACGTACTC_readname.txt.R1.bed.hg18	23857	8294	0.652345
./GB930157_S57/AGAATCAG_readname.txt.R1.bed.hg18	9370	3406	0.636499
./GB930157_S57/AGTTGACC_readname.txt.R1.bed.hg18	7038	2549	0.637823
./GB930157_S57/ATATGCTG_readname.txt.R1.bed.hg18	39863	14912	0.625919
./GB930157_S57/ATGGACTG_readname.txt.R1.bed.hg18	16342	6144	0.624036
./GB930157_S57/ATTAAGCG_readname.txt.R1.bed.hg18	13472	5335	0.603993
./GB930157_S57/CAAGTCAC_readname.txt.R1.bed.hg18	38689	12924	0.665952
./GB930157_S57/CAATTCGT_readname.txt.R1.bed.hg18	29106	9915	0.659349
./GB930157_S57/CACTCTTG_readname.txt.R1.bed.hg18	22438	7604	0.661111
./GB930157_S57/CAGCTCTT_readname.txt.R1.bed.hg18	12423	4694	0.622152
./GB930157_S57/CGATTACA_readname.txt.R1.bed.hg18	9986	3864	0.613058
./GB930157_S57/CTAGTGTG_readname.txt.R1.bed.hg18	13447	5013	0.627203
./GB930157_S57/CTCTGATT_readname.txt.R1.bed.hg18	39919	13515	0.661439
./GB930157_S57/GACGTTAA_readname.txt.R1.bed.hg18	29910	10489	0.649315
./GB930157_S57/GGTCAATG_readname.txt.R1.bed.hg18	14863	5187	0.651013
./GB930157_S57/GTACCGAT_readname.txt.R1.bed.hg18	56263	18782	0.666175
./GB930157_S57/GTCTCCTA_readname.txt.R1.bed.hg18	31293	10733	0.657016
./GB930157_S57/GTGAACGT_readname.txt.R1.bed.hg18	4233	1827	0.568391
./GB930157_S57/TAACGTGT_readname.txt.R1.bed.hg18	41502	15517	0.626114
./GB930157_S57/TAAGGTGT_readname.txt.R1.bed.hg18	30267	10579	0.650477
./GB930157_S57/TAGTTCTG_readname.txt.R1.bed.hg18	238871	84025	0.648241
./GB930157_S57/TCAAGTTG_readname.txt.R1.bed.hg18	7178	2774	0.613541
./GB930157_S57/TCCGGTAT_readname.txt.R1.bed.hg18	28446	10249	0.639703
./GB930157_S57/TCCTGCTG_readname.txt.R1.bed.hg18	31228	10441	0.665653
./GB930157_S57/TGGACATG_readname.txt.R1.bed.hg18	6319	2404	0.61956
./GB930158_S58/AACTGCCA_readname.txt.R1.bed.hg18	26538	9019	0.660148
./GB930158_S58/AATCGGAT_readname.txt.R1.bed.hg18	50199	17645	0.648499
./GB930158_S58/AGTTGACC_readname.txt.R1.bed.hg18	23222	7948	0.657738
./GB930158_S58/ATGACTGT_readname.txt.R1.bed.hg18	68404	23307	0.659274
./GB930158_S58/ATGGCTGT_readname.txt.R1.bed.hg18	6885	2544	0.630501
./GB930158_S58/CAATGTGT_readname.txt.R1.bed.hg18	7146	2974	0.583823
./GB930158_S58/CACTCTTG_readname.txt.R1.bed.hg18	6481	2534	0.609011
./GB930158_S58/CATGTAGA_readname.txt.R1.bed.hg18	10561	3804	0.639807
./GB930158_S58/CTAAGTGT_readname.txt.R1.bed.hg18	28592	10064	0.648013
./GB930158_S58/CTGACGTT_readname.txt.R1.bed.hg18	36618	12502	0.658583
./GB930158_S58/CTGCAATC_readname.txt.R1.bed.hg18	50103	17593	0.648863
./GB930158_S58/GAGACCTT_readname.txt.R1.bed.hg18	21106	7206	0.65858
./GB930158_S58/GATATTGT_readname.txt.R1.bed.hg18	9013	3525	0.608898
./GB930158_S58/GATGGCTT_readname.txt.R1.bed.hg18	43631	17043	0.609383
./GB930158_S58/GTACCGAT_readname.txt.R1.bed.hg18	7960	2876	0.638693
./GB930158_S58/GTGAACGT_readname.txt.R1.bed.hg18	16037	5589	0.651493
./GB930158_S58/TAACCAAG_readname.txt.R1.bed.hg18	44587	15203	0.659026
./GB930158_S58/TACACTGT_readname.txt.R1.bed.hg18	9639	3471	0.6399
./GB930158_S58/TACAGTGT_readname.txt.R1.bed.hg18	60149	21954	0.635006
./GB930158_S58/TAGACGGA_readname.txt.R1.bed.hg18	56143	20154	0.641024
./GB930158_S58/TAGTTCTG_readname.txt.R1.bed.hg18	5654	2321	0.589494
./GB930158_S58/TCGTCGAT_readname.txt.R1.bed.hg18	15588	5374	0.655248
./GB930158_S58/TCGTTAGC_readname.txt.R1.bed.hg18	10880	3733	0.656893
./GB930158_S58/TGATGCGA_readname.txt.R1.bed.hg18	13022	4905	0.62333
./GB930158_S58/TGGCGTAT_readname.txt.R1.bed.hg18	41184	13730	0.666618
./GB930159_S59/AACTGCCA_readname.txt.R1.bed.hg18	12489	4601	0.631596
./GB930159_S59/ACGTACTC_readname.txt.R1.bed.hg18	7106	2480	0.650999
./GB930159_S59/AGGTTGCT_readname.txt.R1.bed.hg18	21888	7841	0.641767
./GB930159_S59/ATCTGATG_readname.txt.R1.bed.hg18	18913	6936	0.633268
./GB930159_S59/CACTCTTG_readname.txt.R1.bed.hg18	7107	2561	0.639651
./GB930159_S59/CAGTGATG_readname.txt.R1.bed.hg18	9235	3388	0.633135
./GB930159_S59/CATATGCT_readname.txt.R1.bed.hg18	17990	7491	0.583602
./GB930159_S59/CATGTATT_readname.txt.R1.bed.hg18	38766	13716	0.646185
./GB930159_S59/CATGTGTG_readname.txt.R1.bed.hg18	39354	14039	0.643264
./GB930159_S59/CGTAATTA_readname.txt.R1.bed.hg18	22774	10125	0.555414
./GB930159_S59/GACGTTAA_readname.txt.R1.bed.hg18	7837	3011	0.615797
./GB930159_S59/GATATTGT_readname.txt.R1.bed.hg18	6521	2368	0.636866
./GB930159_S59/GATGGCTT_readname.txt.R1.bed.hg18	24846	8860	0.643403
./GB930159_S59/GCTTAGTA_readname.txt.R1.bed.hg18	4123	1593	0.613631
./GB930159_S59/GGATCATC_readname.txt.R1.bed.hg18	37960	13027	0.656823
./GB930159_S59/GGTCAATG_readname.txt.R1.bed.hg18	6681	2610	0.60934
./GB930159_S59/GTTATATC_readname.txt.R1.bed.hg18	15260	5408	0.645609
./GB930159_S59/TAACGTGT_readname.txt.R1.bed.hg18	8548	3572	0.582124
./GB930159_S59/TACAGTGT_readname.txt.R1.bed.hg18	5541	2201	0.602779
./GB930159_S59/TAGACGGA_readname.txt.R1.bed.hg18	5581	2375	0.574449
./GB930159_S59/TAGTTCTG_readname.txt.R1.bed.hg18	4419	1883	0.573885
./GB930159_S59/TCCGGTAT_readname.txt.R1.bed.hg18	15006	5393	0.64061
./GB930159_S59/TCCTGCTG_readname.txt.R1.bed.hg18	27561	9323	0.661732
./GB930159_S59/TCGTTAGC_readname.txt.R1.bed.hg18	4179	1530	0.633884
./GB930159_S59/TTAAGCAT_readname.txt.R1.bed.hg18	5963	2362	0.603891
./GB930160_S60/AATCGGAT_readname.txt.R1.bed.hg18	12819	4431	0.654341
./GB930160_S60/AATGACAG_readname.txt.R1.bed.hg18	33148	11949	0.639526
./GB930160_S60/ACTGCATG_readname.txt.R1.bed.hg18	32503	11911	0.633542
./GB930160_S60/AGAATCAG_readname.txt.R1.bed.hg18	21777	8079	0.629012
./GB930160_S60/ATAGATAC_readname.txt.R1.bed.hg18	28687	10346	0.639349
./GB930160_S60/ATATGCTG_readname.txt.R1.bed.hg18	13431	4918	0.633832
./GB930160_S60/ATGGACTG_readname.txt.R1.bed.hg18	38652	13603	0.648065
./GB930160_S60/CAAGGTCA_readname.txt.R1.bed.hg18	27571	9530	0.654347
./GB930160_S60/CAATTCGT_readname.txt.R1.bed.hg18	4446	1783	0.598965
./GB930160_S60/CACAGTTG_readname.txt.R1.bed.hg18	41670	14708	0.647036
./GB930160_S60/CACTCTTG_readname.txt.R1.bed.hg18	10389	3921	0.622582
./GB930160_S60/CAGCTCTT_readname.txt.R1.bed.hg18	30804	11295	0.633327
./GB930160_S60/CAGTGATG_readname.txt.R1.bed.hg18	7668	2932	0.617632
./GB930160_S60/CATGTGTG_readname.txt.R1.bed.hg18	25743	9623	0.62619
./GB930160_S60/CTTCGTTG_readname.txt.R1.bed.hg18	12881	4658	0.638382
./GB930160_S60/GACTGTGT_readname.txt.R1.bed.hg18	31243	11213	0.641104
./GB930160_S60/TAACGTGT_readname.txt.R1.bed.hg18	14713	5243	0.643648
./GB930160_S60/TACGCGTT_readname.txt.R1.bed.hg18	55965	19857	0.645189
./GB930160_S60/TCAAGTTG_readname.txt.R1.bed.hg18	6247	2358	0.622539
./GB930160_S60/TCATCGTG_readname.txt.R1.bed.hg18	50709	18054	0.643969
./GB930160_S60/TCGTCGAT_readname.txt.R1.bed.hg18	5946	2412	0.594349
./GB930160_S60/TGATGCGA_readname.txt.R1.bed.hg18	25165	9029	0.641208
./GB930160_S60/TGGACATG_readname.txt.R1.bed.hg18	11371	4062	0.642775
./GB930160_S60/TTAAGCAT_readname.txt.R1.bed.hg18	31392	11827	0.623248
./GB930161_S61/AACTGCCA_readname.txt.R1.bed.hg18	40873	13889	0.660191
./GB930161_S61/ACTGCATG_readname.txt.R1.bed.hg18	8215	2961	0.639562
./GB930161_S61/AGTTGACC_readname.txt.R1.bed.hg18	59613	20817	0.650798
./GB930161_S61/ATAGATAC_readname.txt.R1.bed.hg18	8881	3737	0.579214
./GB930161_S61/ATGACACC_readname.txt.R1.bed.hg18	42598	15212	0.642894
./GB930161_S61/ATGACTGT_readname.txt.R1.bed.hg18	7208	2704	0.624861
./GB930161_S61/CAATTCGT_readname.txt.R1.bed.hg18	27168	9447	0.652275
./GB930161_S61/CAGCTCTT_readname.txt.R1.bed.hg18	40849	14290	0.650175
./GB930161_S61/CAGTGATG_readname.txt.R1.bed.hg18	15640	5856	0.625575
./GB930161_S61/CTGCAATC_readname.txt.R1.bed.hg18	6066	2402	0.604022
./GB930161_S61/GATAACCA_readname.txt.R1.bed.hg18	6603	2659	0.597304
./GB930161_S61/GGATCATC_readname.txt.R1.bed.hg18	40705	13959	0.657069
./GB930161_S61/GTCTCCTA_readname.txt.R1.bed.hg18	17839	6598	0.630136
./GB930161_S61/TAGCAGTT_readname.txt.R1.bed.hg18	45949	15931	0.65329
./GB930161_S61/TAGTTCTG_readname.txt.R1.bed.hg18	49513	17574	0.645063
./GB930161_S61/TCGATTAA_readname.txt.R1.bed.hg18	28526	10199	0.642467
./GB930161_S61/TCGTTAGC_readname.txt.R1.bed.hg18	6102	2305	0.622255
./GB930161_S61/TCTACTGT_readname.txt.R1.bed.hg18	21379	7517	0.648393
./GB930161_S61/TGAGCGAA_readname.txt.R1.bed.hg18	6205	2436	0.607413
./GB930162_S62/AGAATCAG_readname.txt.R1.bed.hg18	48803	16446	0.663013
./GB930162_S62/AGAGTTGT_readname.txt.R1.bed.hg18	9546	3550	0.628116
./GB930162_S62/AGCAATCC_readname.txt.R1.bed.hg18	28105	9223	0.671838
./GB930162_S62/ATACGACT_readname.txt.R1.bed.hg18	32023	10988	0.656872
./GB930162_S62/ATTAAGCG_readname.txt.R1.bed.hg18	9464	3599	0.619717
./GB930162_S62/CAGCTCTT_readname.txt.R1.bed.hg18	6396	2334	0.635084
./GB930162_S62/CATATGCT_readname.txt.R1.bed.hg18	11241	5784	0.485455
./GB930162_S62/CATGTGTG_readname.txt.R1.bed.hg18	11995	4361	0.636432
./GB930162_S62/CCTCATGT_readname.txt.R1.bed.hg18	7513	2830	0.62332
./GB930162_S62/CGATTACA_readname.txt.R1.bed.hg18	7931	2777	0.649855
./GB930162_S62/CTAAGTGT_readname.txt.R1.bed.hg18	10329	3786	0.633459
./GB930162_S62/CTGCAATC_readname.txt.R1.bed.hg18	19172	6415	0.665397
./GB930162_S62/CTTCGTTG_readname.txt.R1.bed.hg18	31571	10699	0.661113
./GB930162_S62/GACTAAGA_readname.txt.R1.bed.hg18	21404	7335	0.657307
./GB930162_S62/GATATTGT_readname.txt.R1.bed.hg18	53639	17679	0.670408
./GB930162_S62/GATGGCTT_readname.txt.R1.bed.hg18	10728	3661	0.658743
./GB930162_S62/GCGTAATT_readname.txt.R1.bed.hg18	45899	16080	0.649666
./GB930162_S62/GGTCAATG_readname.txt.R1.bed.hg18	38284	12232	0.680493
./GB930162_S62/GTACCGAT_readname.txt.R1.bed.hg18	28398	9019	0.682407
./GB930162_S62/TAGTTCTG_readname.txt.R1.bed.hg18	57759	18944	0.672016
./GB930162_S62/TCGTTAGC_readname.txt.R1.bed.hg18	60321	20305	0.663384
./GB930162_S62/TTAAGCAT_readname.txt.R1.bed.hg18	9900	3521	0.644343
./GB930163_S63/AAGAATCT_readname.txt.R1.bed.hg18	24721	8741	0.646414
./GB930163_S63/AATGACAG_readname.txt.R1.bed.hg18	9008	3320	0.631439
./GB930163_S63/ACACACGT_readname.txt.R1.bed.hg18	4565	1688	0.63023
./GB930163_S63/AGAGTTGT_readname.txt.R1.bed.hg18	9224	3290	0.643322
./GB930163_S63/AGGTTGCT_readname.txt.R1.bed.hg18	7885	2985	0.621433
./GB930163_S63/ATGACTGT_readname.txt.R1.bed.hg18	46673	15879	0.659782
./GB930163_S63/ATGGCTGT_readname.txt.R1.bed.hg18	14178	5005	0.646988
./GB930163_S63/ATTAAGCG_readname.txt.R1.bed.hg18	13402	5293	0.605059
./GB930163_S63/CATATGCT_readname.txt.R1.bed.hg18	4847	3142	0.351764
./GB930163_S63/CCTAGTAG_readname.txt.R1.bed.hg18	53726	19349	0.639858
./GB930163_S63/CTAAGTGT_readname.txt.R1.bed.hg18	12232	4462	0.635219
./GB930163_S63/GATATTGT_readname.txt.R1.bed.hg18	9457	3389	0.641641
./GB930163_S63/GATGGCTT_readname.txt.R1.bed.hg18	5070	1939	0.617554
./GB930163_S63/GGTCAATG_readname.txt.R1.bed.hg18	30775	10991	0.642859
./GB930163_S63/GTCTCCTA_readname.txt.R1.bed.hg18	1853	1693	0.0863465
./GB930163_S63/GTGAACGT_readname.txt.R1.bed.hg18	50025	17115	0.657871
./GB930163_S63/TAACGTGT_readname.txt.R1.bed.hg18	35012	12394	0.646007
./GB930163_S63/TAAGGTGT_readname.txt.R1.bed.hg18	10968	3948	0.640044
./GB930163_S63/TCAAGTTG_readname.txt.R1.bed.hg18	45296	15781	0.651603
./GB930163_S63/TCCGGTAT_readname.txt.R1.bed.hg18	51689	17959	0.652557
./GB930163_S63/TCGTCGAT_readname.txt.R1.bed.hg18	6711	2473	0.631501
./GB930163_S63/TGAGCGAA_readname.txt.R1.bed.hg18	18116	6453	0.643796
./GB930163_S63/TGGCGTAT_readname.txt.R1.bed.hg18	11550	4379	0.620866
./GB930163_S63/TTCACGAT_readname.txt.R1.bed.hg18	44569	14959	0.664363
./GB930164_S64/AACTGCCA_readname.txt.R1.bed.hg18	4162	1751	0.579289
./GB930164_S64/AGAATCAG_readname.txt.R1.bed.hg18	47408	17315	0.634766
./GB930164_S64/ATCTGATG_readname.txt.R1.bed.hg18	5765	2256	0.608673
./GB930164_S64/ATTGGCGT_readname.txt.R1.bed.hg18	16703	5856	0.649404
./GB930164_S64/CAAGTCAC_readname.txt.R1.bed.hg18	17572	6136	0.650808
./GB930164_S64/CAATTCGT_readname.txt.R1.bed.hg18	9113	3436	0.622956
./GB930164_S64/CATGTATT_readname.txt.R1.bed.hg18	5989	2313	0.613792
./GB930164_S64/CATGTGTG_readname.txt.R1.bed.hg18	30820	10349	0.664212
./GB930164_S64/CCTCATGT_readname.txt.R1.bed.hg18	4148	1887	0.545082
./GB930164_S64/CGAGAATG_readname.txt.R1.bed.hg18	8862	3296	0.628075
./GB930164_S64/CGATTACA_readname.txt.R1.bed.hg18	4522	1633	0.638877
./GB930164_S64/CTAGTGTG_readname.txt.R1.bed.hg18	23954	8474	0.646239
./GB930164_S64/CTTCGTTG_readname.txt.R1.bed.hg18	21566	7002	0.675322
./GB930164_S64/GACGTTAA_readname.txt.R1.bed.hg18	16930	5774	0.658949
./GB930164_S64/GATGGCTT_readname.txt.R1.bed.hg18	44364	15872	0.642232
./GB930164_S64/GCGTAATT_readname.txt.R1.bed.hg18	4350	1576	0.637701
./GB930164_S64/GCTTAGTA_readname.txt.R1.bed.hg18	6121	2425	0.603823
./GB930164_S64/GGTCAATG_readname.txt.R1.bed.hg18	6374	2350	0.631315
./GB930164_S64/GTACCGAT_readname.txt.R1.bed.hg18	23334	7647	0.672281
./GB930164_S64/TCGTCGAT_readname.txt.R1.bed.hg18	46610	15547	0.666445
./GB930164_S64/TTAAGCAT_readname.txt.R1.bed.hg18	26568	9061	0.658951
./GB930164_S64/TTCACGAT_readname.txt.R1.bed.hg18	39270	13861	0.647033
./GB930165_S65/AGAGTTGT_readname.txt.R1.bed.hg18	5972	2193	0.632786
./GB930165_S65/AGGCTTGA_readname.txt.R1.bed.hg18	84410	28458	0.66286
./GB930165_S65/ATACGACT_readname.txt.R1.bed.hg18	20800	7332	0.6475
./GB930165_S65/ATAGATAC_readname.txt.R1.bed.hg18	22423	8382	0.626187
./GB930165_S65/ATGACTGT_readname.txt.R1.bed.hg18	6186	2241	0.63773
./GB930165_S65/CAATTCGT_readname.txt.R1.bed.hg18	8129	2989	0.632304
./GB930165_S65/CACAGTTG_readname.txt.R1.bed.hg18	54789	20008	0.634817
./GB930165_S65/CGAACTAC_readname.txt.R1.bed.hg18	42697	15481	0.637422
./GB930165_S65/CGAGAATG_readname.txt.R1.bed.hg18	13548	4946	0.634928
./GB930165_S65/CGATTACA_readname.txt.R1.bed.hg18	5732	2037	0.644627
./GB930165_S65/CTAAGTGT_readname.txt.R1.bed.hg18	6349	2457	0.61301
./GB930165_S65/CTTCGTTG_readname.txt.R1.bed.hg18	12081	4560	0.622548
./GB930165_S65/GTCTCCTA_readname.txt.R1.bed.hg18	4689	1930	0.588398
./GB930165_S65/GTGAACGT_readname.txt.R1.bed.hg18	20157	7646	0.620678
./GB930165_S65/TAAGGTGT_readname.txt.R1.bed.hg18	4714	1906	0.595672
./GB930165_S65/TAGACGGA_readname.txt.R1.bed.hg18	39901	14083	0.647051
./GB930165_S65/TCAAGTTG_readname.txt.R1.bed.hg18	73602	25708	0.650716
./GB930165_S65/TCATCGTG_readname.txt.R1.bed.hg18	49845	17362	0.65168
./GB930165_S65/TCGTCGAT_readname.txt.R1.bed.hg18	18133	6580	0.637126
./GB930165_S65/TCGTTAGC_readname.txt.R1.bed.hg18	6569	2382	0.637388
./GB930165_S65/TTAAGCAT_readname.txt.R1.bed.hg18	24550	9277	0.622118
./GB930166_S66/ACACACGT_readname.txt.R1.bed.hg18	17392	6159	0.645872
./GB930166_S66/AGAATCAG_readname.txt.R1.bed.hg18	8312	3174	0.618142
./GB930166_S66/AGTTGACC_readname.txt.R1.bed.hg18	9088	3358	0.630502
./GB930166_S66/ATGACTGT_readname.txt.R1.bed.hg18	5487	2079	0.621104
./GB930166_S66/CACAGTTG_readname.txt.R1.bed.hg18	7066	2638	0.626663
./GB930166_S66/CATAACTT_readname.txt.R1.bed.hg18	34478	11782	0.658275
./GB930166_S66/CATATGCT_readname.txt.R1.bed.hg18	8334	5186	0.37773
./GB930166_S66/CATGTATT_readname.txt.R1.bed.hg18	59096	19871	0.663751
./GB930166_S66/CCTCATGT_readname.txt.R1.bed.hg18	37675	13220	0.649104
./GB930166_S66/CTCTGATT_readname.txt.R1.bed.hg18	34857	11733	0.663396
./GB930166_S66/GATAACCA_readname.txt.R1.bed.hg18	6118	2489	0.593168
./GB930166_S66/GATATTGT_readname.txt.R1.bed.hg18	8534	3112	0.635341
./GB930166_S66/GCGTAATT_readname.txt.R1.bed.hg18	22831	7975	0.650694
./GB930166_S66/GGTCAATG_readname.txt.R1.bed.hg18	14373	4888	0.659918
./GB930166_S66/GTCTCCTA_readname.txt.R1.bed.hg18	8522	3210	0.623328
./GB930166_S66/TAACGTGT_readname.txt.R1.bed.hg18	56771	19921	0.649099
./GB930166_S66/TACGCGTT_readname.txt.R1.bed.hg18	9618	3499	0.636203
./GB930166_S66/TAGCAGTT_readname.txt.R1.bed.hg18	42825	14610	0.658844
./GB930166_S66/TCAAGTTG_readname.txt.R1.bed.hg18	12153	4234	0.651609
./GB930166_S66/TCCTGCTG_readname.txt.R1.bed.hg18	9522	3649	0.616782
./GB930166_S66/TCGTCGAT_readname.txt.R1.bed.hg18	39442	13637	0.654252
./GB930166_S66/TGAGCGAA_readname.txt.R1.bed.hg18	5639	2073	0.632382
./GB930166_S66/TGGACATG_readname.txt.R1.bed.hg18	12148	4521	0.62784
./GB930166_S66/TTAAGCAT_readname.txt.R1.bed.hg18	12060	4827	0.599751
./GB930167_S67/ACGTACTC_readname.txt.R1.bed.hg18	12452	4337	0.651703
./GB930167_S67/AGAGTTGT_readname.txt.R1.bed.hg18	7580	3292	0.565699
./GB930167_S67/ATCTGATG_readname.txt.R1.bed.hg18	39400	13346	0.661269
./GB930167_S67/ATGGACTG_readname.txt.R1.bed.hg18	31372	10969	0.650357
./GB930167_S67/CAAGTCAC_readname.txt.R1.bed.hg18	18185	6687	0.632279
./GB930167_S67/CACTCTTG_readname.txt.R1.bed.hg18	8874	3308	0.627226
./GB930167_S67/CATGTAGA_readname.txt.R1.bed.hg18	13698	4927	0.640312
./GB930167_S67/CGAACTAC_readname.txt.R1.bed.hg18	6965	2593	0.62771
./GB930167_S67/CTAAGTGT_readname.txt.R1.bed.hg18	55216	20473	0.62922
./GB930167_S67/CTCTGATT_readname.txt.R1.bed.hg18	51066	17674	0.653899
./GB930167_S67/CTGCAATC_readname.txt.R1.bed.hg18	86912	31106	0.642098
./GB930167_S67/GACTGTGT_readname.txt.R1.bed.hg18	5836	2157	0.630398
./GB930167_S67/GAGACCTT_readname.txt.R1.bed.hg18	24685	8557	0.653352
./GB930167_S67/GAGCGATA_readname.txt.R1.bed.hg18	11880	4150	0.650673
./GB930167_S67/GTACCGAT_readname.txt.R1.bed.hg18	9593	3336	0.652246
./GB930167_S67/TAACCAAG_readname.txt.R1.bed.hg18	35875	12683	0.646467
./GB930167_S67/TACACTGT_readname.txt.R1.bed.hg18	5088	1912	0.624214
./GB930167_S67/TACGCGTT_readname.txt.R1.bed.hg18	33930	11920	0.648688
./GB930167_S67/TAGCAGTT_readname.txt.R1.bed.hg18	37462	12613	0.663312
./GB930167_S67/TCCGGTAT_readname.txt.R1.bed.hg18	17290	6828	0.60509
./GB930167_S67/TCTGTTGT_readname.txt.R1.bed.hg18	14372	5204	0.637907
./GB930167_S67/TGAGCGAA_readname.txt.R1.bed.hg18	11266	4100	0.636073
./GB930167_S67/TGGCGTAT_readname.txt.R1.bed.hg18	26765	9283	0.653166
./GB930167_S67/TTAAGCAT_readname.txt.R1.bed.hg18	14436	5207	0.639305
./GB930168_S68/AAGAATCT_readname.txt.R1.bed.hg18	48660	17658	0.637115
./GB930168_S68/AATGACAG_readname.txt.R1.bed.hg18	10085	3608	0.642241
./GB930168_S68/ACGTACGT_readname.txt.R1.bed.hg18	7367	2687	0.635265
./GB930168_S68/ACGTACTC_readname.txt.R1.bed.hg18	4242	1505	0.645215
./GB930168_S68/AGAATCAG_readname.txt.R1.bed.hg18	17115	6327	0.630324
./GB930168_S68/AGAGTTGT_readname.txt.R1.bed.hg18	33749	11757	0.651634
./GB930168_S68/ATCTGATG_readname.txt.R1.bed.hg18	25136	8917	0.64525
./GB930168_S68/ATGACACC_readname.txt.R1.bed.hg18	11272	4115	0.634936
./GB930168_S68/ATGGCTGT_readname.txt.R1.bed.hg18	3516	1555	0.557736
./GB930168_S68/ATTGGCGT_readname.txt.R1.bed.hg18	11266	4161	0.630659
./GB930168_S68/CAAGATAT_readname.txt.R1.bed.hg18	37966	13767	0.637386
./GB930168_S68/CAAGTCAC_readname.txt.R1.bed.hg18	3628	1701	0.531147
./GB930168_S68/CAGCTCTT_readname.txt.R1.bed.hg18	1929	1767	0.0839813
./GB930168_S68/CATGTAGA_readname.txt.R1.bed.hg18	9972	3761	0.622844
./GB930168_S68/CATGTATT_readname.txt.R1.bed.hg18	17097	6043	0.646546
./GB930168_S68/CGTAATTA_readname.txt.R1.bed.hg18	3654	2260	0.3815
./GB930168_S68/CTTCGTTG_readname.txt.R1.bed.hg18	11519	4106	0.643545
./GB930168_S68/GACTAAGA_readname.txt.R1.bed.hg18	8960	3210	0.641741
./GB930168_S68/GTACCGAT_readname.txt.R1.bed.hg18	12139	4153	0.65788
./GB930168_S68/TACAGTGT_readname.txt.R1.bed.hg18	4214	1734	0.588514
./GB930168_S68/TAGACGGA_readname.txt.R1.bed.hg18	5883	2204	0.625361
./GB930168_S68/TAGCAGTT_readname.txt.R1.bed.hg18	8188	2999	0.633732
./GB930168_S68/TAGTTCTG_readname.txt.R1.bed.hg18	5868	2383	0.593899
./GB930168_S68/TCATCGTG_readname.txt.R1.bed.hg18	32515	11306	0.652284
./GB930168_S68/TGGCGTAT_readname.txt.R1.bed.hg18	21656	8194	0.621629
./GB930169_S69/ACTGCATG_readname.txt.R1.bed.hg18	18883	6301	0.666314
./GB930169_S69/AGGCTTGA_readname.txt.R1.bed.hg18	18101	5898	0.674162
./GB930169_S69/AGGTTGCT_readname.txt.R1.bed.hg18	40592	13554	0.666092
./GB930169_S69/AGTTGACC_readname.txt.R1.bed.hg18	13989	4819	0.655515
./GB930169_S69/ATACGACT_readname.txt.R1.bed.hg18	17087	5764	0.662668
./GB930169_S69/ATAGATAC_readname.txt.R1.bed.hg18	47779	16022	0.664664
./GB930169_S69/ATATGCTG_readname.txt.R1.bed.hg18	57574	19892	0.654497
./GB930169_S69/ATGACTGT_readname.txt.R1.bed.hg18	7774	3062	0.606123
./GB930169_S69/ATTGGCGT_readname.txt.R1.bed.hg18	17959	6428	0.642074
./GB930169_S69/CAAGGTCA_readname.txt.R1.bed.hg18	16657	5549	0.666867
./GB930169_S69/CAAGTCAC_readname.txt.R1.bed.hg18	18238	6220	0.658954
./GB930169_S69/CAGCTCTT_readname.txt.R1.bed.hg18	228137	78044	0.657907
./GB930169_S69/CATGTATT_readname.txt.R1.bed.hg18	65249	22208	0.659642
./GB930169_S69/CTTCGTTG_readname.txt.R1.bed.hg18	1852	1678	0.0939525
./GB930169_S69/GACTAAGA_readname.txt.R1.bed.hg18	75907	24663	0.675089
./GB930169_S69/GATGGCTT_readname.txt.R1.bed.hg18	16268	5532	0.659946
./GB930169_S69/GGAACTGT_readname.txt.R1.bed.hg18	21866	7316	0.665417
./GB930169_S69/GTCTCCTA_readname.txt.R1.bed.hg18	50382	17330	0.656028
./GB930169_S69/GTTATATC_readname.txt.R1.bed.hg18	13316	5110	0.616251
./GB930169_S69/TAGACGGA_readname.txt.R1.bed.hg18	8999	3440	0.617735
./GB930169_S69/TAGCAGTT_readname.txt.R1.bed.hg18	12269	4174	0.659793
./GB930169_S69/TAGTTCTG_readname.txt.R1.bed.hg18	27797	9711	0.650646
./GB930169_S69/TCAAGTTG_readname.txt.R1.bed.hg18	16862	5935	0.648025
./GB930169_S69/TCCTGCTG_readname.txt.R1.bed.hg18	52715	17278	0.672238
./GB930169_S69/TGATGCGA_readname.txt.R1.bed.hg18	97923	32906	0.66396
./GB930170_S70/AACTGCCA_readname.txt.R1.bed.hg18	33154	11347	0.657749
./GB930170_S70/ACGTACGT_readname.txt.R1.bed.hg18	18318	6443	0.648269
./GB930170_S70/AGAATCAG_readname.txt.R1.bed.hg18	44008	15631	0.644815
./GB930170_S70/AGGCTTGA_readname.txt.R1.bed.hg18	10710	4080	0.619048
./GB930170_S70/ATGGCTGT_readname.txt.R1.bed.hg18	9958	3536	0.644909
./GB930170_S70/ATTAAGCG_readname.txt.R1.bed.hg18	24522	9913	0.595751
./GB930170_S70/CAAGTCAC_readname.txt.R1.bed.hg18	32336	12136	0.624691
./GB930170_S70/CACTCTTG_readname.txt.R1.bed.hg18	46953	16310	0.652631
./GB930170_S70/CATATGCT_readname.txt.R1.bed.hg18	21563	12118	0.438019
./GB930170_S70/CTAGTGTG_readname.txt.R1.bed.hg18	21766	7852	0.639254
./GB930170_S70/CTTCGTTG_readname.txt.R1.bed.hg18	67067	24078	0.640986
./GB930170_S70/GACTGTGT_readname.txt.R1.bed.hg18	41714	14515	0.652035
./GB930170_S70/GAGCGATA_readname.txt.R1.bed.hg18	30370	10517	0.653704
./GB930170_S70/GATATTGT_readname.txt.R1.bed.hg18	27922	10103	0.638171
./GB930170_S70/GCGTAATT_readname.txt.R1.bed.hg18	35404	12173	0.656169
./GB930170_S70/GGAACTGT_readname.txt.R1.bed.hg18	6338	2386	0.623541
./GB930170_S70/GTCTCCTA_readname.txt.R1.bed.hg18	10843	4235	0.609425
./GB930170_S70/TACGCGTT_readname.txt.R1.bed.hg18	34515	12219	0.64598
./GB930170_S70/TAGACGGA_readname.txt.R1.bed.hg18	9869	3602	0.635019
./GB930170_S70/TCAAGTTG_readname.txt.R1.bed.hg18	20465	7376	0.63958
./GB930170_S70/TCGTCGAT_readname.txt.R1.bed.hg18	26047	8970	0.655623
./GB930170_S70/TGGACATG_readname.txt.R1.bed.hg18	75415	26956	0.642564
./GB930170_S70/TGGCGTAT_readname.txt.R1.bed.hg18	17379	6425	0.630301
./GB930171_S71/AAGAGGTT_readname.txt.R1.bed.hg18	14384	4857	0.662333
./GB930171_S71/ACGTACGT_readname.txt.R1.bed.hg18	43585	14479	0.667799
./GB930171_S71/ATAGATAC_readname.txt.R1.bed.hg18	18454	6946	0.623605
./GB930171_S71/ATGACACC_readname.txt.R1.bed.hg18	15464	5484	0.64537
./GB930171_S71/ATGACTGT_readname.txt.R1.bed.hg18	40564	13610	0.664481
./GB930171_S71/CAATGTGT_readname.txt.R1.bed.hg18	35273	12571	0.643608
./GB930171_S71/CCTCATGT_readname.txt.R1.bed.hg18	8339	3076	0.631131
./GB930171_S71/CGAACTAC_readname.txt.R1.bed.hg18	4940	1974	0.600405
./GB930171_S71/CGATTACA_readname.txt.R1.bed.hg18	13177	4751	0.639448
./GB930171_S71/CTAAGTGT_readname.txt.R1.bed.hg18	26158	9174	0.649285
./GB930171_S71/CTCTGATT_readname.txt.R1.bed.hg18	14584	5359	0.632543
./GB930171_S71/GATATTGT_readname.txt.R1.bed.hg18	11405	4052	0.644717
./GB930171_S71/GATGGCTT_readname.txt.R1.bed.hg18	28752	9718	0.662006
./GB930171_S71/GGATCATC_readname.txt.R1.bed.hg18	7644	2773	0.637232
./GB930171_S71/TAACGTGT_readname.txt.R1.bed.hg18	6027	2240	0.628339
./GB930171_S71/TAAGGTGT_readname.txt.R1.bed.hg18	20680	7233	0.650242
./GB930171_S71/TAGACGGA_readname.txt.R1.bed.hg18	29892	10316	0.654891
./GB930171_S71/TCAAGTTG_readname.txt.R1.bed.hg18	6570	2413	0.632725
./GB930171_S71/TCAGCTTG_readname.txt.R1.bed.hg18	9423	3353	0.644169
./GB930171_S71/TCATCGTG_readname.txt.R1.bed.hg18	148856	50660	0.659671
./GB930171_S71/TCCTGCTG_readname.txt.R1.bed.hg18	9643	3528	0.634139
./GB930171_S71/TCGTCGAT_readname.txt.R1.bed.hg18	58094	19965	0.656333
./GB930171_S71/TGAGCGAA_readname.txt.R1.bed.hg18	8271	2922	0.646717
./GB930171_S71/TGATGCGA_readname.txt.R1.bed.hg18	19478	7076	0.636718
./GB930172_S72/ACACACGT_readname.txt.R1.bed.hg18	29982	10726	0.642252
./GB930172_S72/ATACGACT_readname.txt.R1.bed.hg18	18528	6410	0.654037
./GB930172_S72/ATAGATAC_readname.txt.R1.bed.hg18	16228	5926	0.634829
./GB930172_S72/ATCTGATG_readname.txt.R1.bed.hg18	5872	2141	0.635388
./GB930172_S72/CAAGATAT_readname.txt.R1.bed.hg18	11218	4019	0.641736
./GB930172_S72/CAATTCGT_readname.txt.R1.bed.hg18	11535	4226	0.633637
./GB930172_S72/CATAACTT_readname.txt.R1.bed.hg18	6976	2656	0.619266
./GB930172_S72/CATGTAGA_readname.txt.R1.bed.hg18	10167	3745	0.631651
./GB930172_S72/CTCTGATT_readname.txt.R1.bed.hg18	4090	1772	0.566748
./GB930172_S72/CTTCGTTG_readname.txt.R1.bed.hg18	10224	3600	0.647887
./GB930172_S72/GACGTTAA_readname.txt.R1.bed.hg18	7928	2860	0.639253
./GB930172_S72/GAGACCTT_readname.txt.R1.bed.hg18	8037	2855	0.644768
./GB930172_S72/GAGCGATA_readname.txt.R1.bed.hg18	11376	4121	0.637746
./GB930172_S72/GCGTAATT_readname.txt.R1.bed.hg18	13671	5084	0.628118
./GB930172_S72/TAACCAAG_readname.txt.R1.bed.hg18	6745	2510	0.627872
./GB930172_S72/TAACGTGT_readname.txt.R1.bed.hg18	22032	7796	0.646151
./GB930172_S72/TACACTGT_readname.txt.R1.bed.hg18	37053	13613	0.632607
./GB930172_S72/TCCGGTAT_readname.txt.R1.bed.hg18	6981	2596	0.628134
./GB930172_S72/TCTACTGT_readname.txt.R1.bed.hg18	29415	10384	0.646983
./GB930172_S72/TGAGCGAA_readname.txt.R1.bed.hg18	25388	8909	0.649086
./GB930173_S73/ACACACGT_readname.txt.R1.bed.hg18	15279	5233	0.657504
./GB930173_S73/ACGTACTC_readname.txt.R1.bed.hg18	6656	2540	0.618389
./GB930173_S73/AGAATCAG_readname.txt.R1.bed.hg18	3758	1575	0.580894
./GB930173_S73/AGGTTGCT_readname.txt.R1.bed.hg18	22913	7890	0.655654
./GB930173_S73/ATATGCTG_readname.txt.R1.bed.hg18	102952	36660	0.643912
./GB930173_S73/ATGGACTG_readname.txt.R1.bed.hg18	29260	9904	0.661517
./GB930173_S73/ATTAAGCG_readname.txt.R1.bed.hg18	5511	2219	0.597351
./GB930173_S73/CACTCTTG_readname.txt.R1.bed.hg18	16432	6056	0.631451
./GB930173_S73/CAGCTCTT_readname.txt.R1.bed.hg18	15508	5531	0.643345
./GB930173_S73/CAGTGATG_readname.txt.R1.bed.hg18	130611	45051	0.655075
./GB930173_S73/CATGGTGT_readname.txt.R1.bed.hg18	30477	10820	0.644978
./GB930173_S73/CATGTATT_readname.txt.R1.bed.hg18	3887	1523	0.608181
./GB930173_S73/CTAAGTGT_readname.txt.R1.bed.hg18	18592	6754	0.636725
./GB930173_S73/GACGTTAA_readname.txt.R1.bed.hg18	14887	5088	0.658225
./GB930173_S73/GACTAAGA_readname.txt.R1.bed.hg18	7288	2913	0.600302
./GB930173_S73/GATATTGT_readname.txt.R1.bed.hg18	7367	2687	0.635265
./GB930173_S73/GCGTAATT_readname.txt.R1.bed.hg18	26567	9145	0.655776
./GB930173_S73/GTACCGAT_readname.txt.R1.bed.hg18	8663	3103	0.64181
./GB930173_S73/GTTATATC_readname.txt.R1.bed.hg18	6807	2585	0.620244
./GB930173_S73/TACGCGTT_readname.txt.R1.bed.hg18	10383	3882	0.62612
./GB930173_S73/TAGACGGA_readname.txt.R1.bed.hg18	42009	14630	0.651741
./GB930173_S73/TCCGGTAT_readname.txt.R1.bed.hg18	10015	3572	0.643335
./GB930173_S73/TCCTGCTG_readname.txt.R1.bed.hg18	41598	13672	0.67133
./GB930173_S73/TGAGCGAA_readname.txt.R1.bed.hg18	26581	9290	0.650502
./GB930174_S74/AAGAATCT_readname.txt.R1.bed.hg18	40300	13871	0.655806
./GB930174_S74/AAGAGGTT_readname.txt.R1.bed.hg18	69123	22594	0.673133
./GB930174_S74/AATGACAG_readname.txt.R1.bed.hg18	4679	1819	0.611242
./GB930174_S74/ACACACGT_readname.txt.R1.bed.hg18	70765	22739	0.678669
./GB930174_S74/AGGTTGCT_readname.txt.R1.bed.hg18	10891	3750	0.655679
./GB930174_S74/ATATGCTG_readname.txt.R1.bed.hg18	5658	2312	0.591375
./GB930174_S74/ATCTGATG_readname.txt.R1.bed.hg18	55748	18322	0.671342
./GB930174_S74/ATTAAGCG_readname.txt.R1.bed.hg18	14053	5705	0.594037
./GB930174_S74/CACAGTTG_readname.txt.R1.bed.hg18	17046	5985	0.648891
./GB930174_S74/CAGCTCTT_readname.txt.R1.bed.hg18	16284	5892	0.638172
./GB930174_S74/CATGTAGA_readname.txt.R1.bed.hg18	5643	1997	0.64611
./GB930174_S74/CATGTGTG_readname.txt.R1.bed.hg18	23856	8251	0.654133
./GB930174_S74/CCTCATGT_readname.txt.R1.bed.hg18	10528	3622	0.655965
./GB930174_S74/CGAACTAC_readname.txt.R1.bed.hg18	15519	5654	0.635672
./GB930174_S74/CTTCGTTG_readname.txt.R1.bed.hg18	8751	3311	0.621643
./GB930174_S74/GACTGTGT_readname.txt.R1.bed.hg18	8878	3234	0.635729
./GB930174_S74/GATGGCTT_readname.txt.R1.bed.hg18	17467	6116	0.649854
./GB930174_S74/GGATCATC_readname.txt.R1.bed.hg18	11978	4140	0.654366
./GB930174_S74/GTTATATC_readname.txt.R1.bed.hg18	25662	8763	0.658522
./GB930174_S74/TAAGGTGT_readname.txt.R1.bed.hg18	23980	8281	0.654671
./GB930174_S74/TACAGTGT_readname.txt.R1.bed.hg18	12077	4253	0.647843
./GB930174_S74/TACGCGTT_readname.txt.R1.bed.hg18	1747	1540	0.118489
./GB930174_S74/TCGTTAGC_readname.txt.R1.bed.hg18	5819	2109	0.637567
./GB930174_S74/TTAAGCAT_readname.txt.R1.bed.hg18	70679	24618	0.651693
./GB930175_S75/AGAGTTGT_readname.txt.R1.bed.hg18	53721	18683	0.652222
./GB930175_S75/AGGCTTGA_readname.txt.R1.bed.hg18	25176	8308	0.670003
./GB930175_S75/ATATGCTG_readname.txt.R1.bed.hg18	19348	6829	0.647044
./GB930175_S75/ATCTGATG_readname.txt.R1.bed.hg18	44093	15517	0.648085
./GB930175_S75/ATGACACC_readname.txt.R1.bed.hg18	30159	10238	0.660533
./GB930175_S75/CAGCTCTT_readname.txt.R1.bed.hg18	20708	7705	0.627922
./GB930175_S75/CATAACTT_readname.txt.R1.bed.hg18	9533	3248	0.659289
./GB930175_S75/CATGGTGT_readname.txt.R1.bed.hg18	4927	1871	0.620256
./GB930175_S75/CGAACTAC_readname.txt.R1.bed.hg18	34661	11927	0.655896
./GB930175_S75/CTGCAATC_readname.txt.R1.bed.hg18	13653	5181	0.620523
./GB930175_S75/CTTCGTTG_readname.txt.R1.bed.hg18	32724	11683	0.642984
./GB930175_S75/GAGCGATA_readname.txt.R1.bed.hg18	31168	10955	0.648518
./GB930175_S75/GCTTAGTA_readname.txt.R1.bed.hg18	40477	13465	0.667342
./GB930175_S75/GGTCAATG_readname.txt.R1.bed.hg18	10805	3703	0.657288
./GB930175_S75/GTTATATC_readname.txt.R1.bed.hg18	26612	9394	0.647001
./GB930175_S75/TACAGTGT_readname.txt.R1.bed.hg18	19206	6557	0.658596
./GB930175_S75/TAGTTCTG_readname.txt.R1.bed.hg18	21649	7608	0.648575
./GB930175_S75/TCGTCGAT_readname.txt.R1.bed.hg18	5733	2344	0.591139
./GB930175_S75/TCGTTAGC_readname.txt.R1.bed.hg18	36768	12395	0.662886
./GB930175_S75/TGAGCGAA_readname.txt.R1.bed.hg18	6075	2125	0.650206
./GB930176_S76/AAGAGGTT_readname.txt.R1.bed.hg18	18893	6348	0.664003
./GB930176_S76/AATCGGAT_readname.txt.R1.bed.hg18	11064	3861	0.65103
./GB930176_S76/AGAATCAG_readname.txt.R1.bed.hg18	34405	11832	0.656096
./GB930176_S76/AGGTTGCT_readname.txt.R1.bed.hg18	13706	4982	0.63651
./GB930176_S76/CAAGATAT_readname.txt.R1.bed.hg18	31038	10328	0.667247
./GB930176_S76/CAAGTCAC_readname.txt.R1.bed.hg18	14879	5473	0.632166
./GB930176_S76/CAATGTGT_readname.txt.R1.bed.hg18	21165	7236	0.658115
./GB930176_S76/CACAGTTG_readname.txt.R1.bed.hg18	23813	8473	0.644186
./GB930176_S76/CATGTAGA_readname.txt.R1.bed.hg18	25186	8583	0.659215
./GB930176_S76/CCTCATGT_readname.txt.R1.bed.hg18	25613	8790	0.656815
./GB930176_S76/CGATTACA_readname.txt.R1.bed.hg18	22493	7808	0.65287
./GB930176_S76/CTCTGATT_readname.txt.R1.bed.hg18	31651	11496	0.636789
./GB930176_S76/GAGCGATA_readname.txt.R1.bed.hg18	12657	4930	0.610492
./GB930176_S76/GATAACCA_readname.txt.R1.bed.hg18	9972	3721	0.626855
./GB930176_S76/GATATTGT_readname.txt.R1.bed.hg18	29352	10199	0.652528
./GB930176_S76/GCTTAGTA_readname.txt.R1.bed.hg18	17537	5879	0.664766
./GB930176_S76/GTGAACGT_readname.txt.R1.bed.hg18	40184	13574	0.662204
./GB930176_S76/GTTATATC_readname.txt.R1.bed.hg18	8943	3368	0.623393
./GB930176_S76/TAACCAAG_readname.txt.R1.bed.hg18	60549	21168	0.650399
./GB930176_S76/TACGCGTT_readname.txt.R1.bed.hg18	76904	26003	0.661877
./GB930176_S76/TAGCAGTT_readname.txt.R1.bed.hg18	67022	23225	0.653472
./GB930176_S76/TAGTTCTG_readname.txt.R1.bed.hg18	72216	24367	0.662582
./GB930176_S76/TCAAGTTG_readname.txt.R1.bed.hg18	14568	5098	0.650055
./GB930176_S76/TCCGGTAT_readname.txt.R1.bed.hg18	9667	3497	0.638254
./GB930176_S76/TTAAGCAT_readname.txt.R1.bed.hg18	46391	16423	0.645987
./GB930177_S77/AAGAATCT_readname.txt.R1.bed.hg18	28871	10119	0.64951
./GB930177_S77/AGAGTTGT_readname.txt.R1.bed.hg18	11278	4211	0.626618
./GB930177_S77/ATATGCTG_readname.txt.R1.bed.hg18	34045	12079	0.645205
./GB930177_S77/ATTAAGCG_readname.txt.R1.bed.hg18	4419	1845	0.582485
./GB930177_S77/CAAGGTCA_readname.txt.R1.bed.hg18	10302	3627	0.647932
./GB930177_S77/CACAGTTG_readname.txt.R1.bed.hg18	4379	1848	0.577986
./GB930177_S77/CATAACTT_readname.txt.R1.bed.hg18	14163	4906	0.653604
./GB930177_S77/CATGGTGT_readname.txt.R1.bed.hg18	12397	4538	0.633944
./GB930177_S77/CTGCAATC_readname.txt.R1.bed.hg18	16064	5741	0.642617
./GB930177_S77/GACTGTGT_readname.txt.R1.bed.hg18	16944	5897	0.651971
./GB930177_S77/GAGACCTT_readname.txt.R1.bed.hg18	28356	9953	0.648998
./GB930177_S77/GAGCGATA_readname.txt.R1.bed.hg18	6760	2595	0.616124
./GB930177_S77/GGTCAATG_readname.txt.R1.bed.hg18	13077	4535	0.653208
./GB930177_S77/GTTATATC_readname.txt.R1.bed.hg18	24459	8292	0.660984
./GB930177_S77/TAACCAAG_readname.txt.R1.bed.hg18	15674	5606	0.642338
./GB930177_S77/TAACGTGT_readname.txt.R1.bed.hg18	12272	4784	0.610169
./GB930177_S77/TACACTGT_readname.txt.R1.bed.hg18	8349	2956	0.645946
./GB930177_S77/TCAAGTTG_readname.txt.R1.bed.hg18	7131	2663	0.62656
./GB930177_S77/TCATCGTG_readname.txt.R1.bed.hg18	7120	6247	0.122612
./GB930177_S77/TCCGGTAT_readname.txt.R1.bed.hg18	13721	4788	0.651046
./GB930177_S77/TCCTGCTG_readname.txt.R1.bed.hg18	18421	6236	0.661473
./GB930177_S77/TCGATTAA_readname.txt.R1.bed.hg18	10106	3599	0.643875
./GB930177_S77/TCTACTGT_readname.txt.R1.bed.hg18	32052	10698	0.66623
./GB930177_S77/TGCAGACA_readname.txt.R1.bed.hg18	17185	5856	0.659238
./GB930177_S77/TTAAGCAT_readname.txt.R1.bed.hg18	29680	10552	0.644474
./GB930178_S78/AAGAATCT_readname.txt.R1.bed.hg18	32121	11198	0.651381
./GB930178_S78/AAGAGGTT_readname.txt.R1.bed.hg18	13910	4882	0.649029
./GB930178_S78/AATCGGAT_readname.txt.R1.bed.hg18	12584	4648	0.630642
./GB930178_S78/ATATGCTG_readname.txt.R1.bed.hg18	15001	5905	0.60636
./GB930178_S78/CAAGATAT_readname.txt.R1.bed.hg18	16868	5873	0.651826
./GB930178_S78/CATGGTGT_readname.txt.R1.bed.hg18	15938	6118	0.616138
./GB930178_S78/CATGTAGA_readname.txt.R1.bed.hg18	25724	8825	0.656935
./GB930178_S78/CGAGAATG_readname.txt.R1.bed.hg18	30438	10959	0.639957
./GB930178_S78/CGATTACA_readname.txt.R1.bed.hg18	21225	7361	0.653192
./GB930178_S78/CGTAATTA_readname.txt.R1.bed.hg18	6824	3098	0.546014
./GB930178_S78/CTCTGATT_readname.txt.R1.bed.hg18	7352	2730	0.628672
./GB930178_S78/CTTCGTTG_readname.txt.R1.bed.hg18	51895	17277	0.667078
./GB930178_S78/GAGACCTT_readname.txt.R1.bed.hg18	30686	10148	0.669295
./GB930178_S78/GAGCGATA_readname.txt.R1.bed.hg18	38729	13272	0.657311
./GB930178_S78/GGAACTGT_readname.txt.R1.bed.hg18	5754	2343	0.592805
./GB930178_S78/GTGAACGT_readname.txt.R1.bed.hg18	5779	2290	0.603738
./GB930178_S78/TAACCAAG_readname.txt.R1.bed.hg18	11305	3904	0.654666
./GB930178_S78/TACAGTGT_readname.txt.R1.bed.hg18	40810	14450	0.64592
./GB930178_S78/TACGCGTT_readname.txt.R1.bed.hg18	40950	14536	0.645031
./GB930178_S78/TAGTTCTG_readname.txt.R1.bed.hg18	9824	3595	0.634059
./GB930178_S78/TCGTCGAT_readname.txt.R1.bed.hg18	17321	5979	0.654812
./GB930178_S78/TGGCGTAT_readname.txt.R1.bed.hg18	15657	5846	0.626621
./GB930178_S78/TTCACGAT_readname.txt.R1.bed.hg18	4124	1919	0.534675
./GB930179_S79/AATGACAG_readname.txt.R1.bed.hg18	10681	4035	0.622226
./GB930179_S79/ACGTACTC_readname.txt.R1.bed.hg18	36225	12378	0.658302
./GB930179_S79/ACTGCATG_readname.txt.R1.bed.hg18	37358	12786	0.657744
./GB930179_S79/ATGGACTG_readname.txt.R1.bed.hg18	10141	3666	0.638497
./GB930179_S79/ATTAAGCG_readname.txt.R1.bed.hg18	15383	6357	0.586752
./GB930179_S79/CAAGGTCA_readname.txt.R1.bed.hg18	36956	12494	0.661922
./GB930179_S79/CAAGTCAC_readname.txt.R1.bed.hg18	10114	3786	0.625667
./GB930179_S79/CAGCTCTT_readname.txt.R1.bed.hg18	7225	2707	0.625329
./GB930179_S79/CATGTATT_readname.txt.R1.bed.hg18	45826	15795	0.655327
./GB930179_S79/CGATTACA_readname.txt.R1.bed.hg18	41511	14647	0.647154
./GB930179_S79/CTGCAATC_readname.txt.R1.bed.hg18	20289	7447	0.632954
./GB930179_S79/GGATCATC_readname.txt.R1.bed.hg18	25229	8851	0.649174
./GB930179_S79/TACACTGT_readname.txt.R1.bed.hg18	9428	3235	0.656873
./GB930179_S79/TACGCGTT_readname.txt.R1.bed.hg18	7842	6327	0.193191
./GB930179_S79/TCTACTGT_readname.txt.R1.bed.hg18	9997	3773	0.622587
./GB930179_S79/TGATGCGA_readname.txt.R1.bed.hg18	44938	15465	0.655859
./GB930179_S79/TGGACATG_readname.txt.R1.bed.hg18	13145	4777	0.636592
./GB930179_S79/TTCACGAT_readname.txt.R1.bed.hg18	13437	4598	0.657811
./GB930180_S80/AACTGCCA_readname.txt.R1.bed.hg18	46130	15797	0.657555
./GB930180_S80/AGGTTGCT_readname.txt.R1.bed.hg18	11530	4266	0.630009
./GB930180_S80/ATAGATAC_readname.txt.R1.bed.hg18	41314	14966	0.63775
./GB930180_S80/CAATTCGT_readname.txt.R1.bed.hg18	8942	3320	0.628718
./GB930180_S80/CACAGTTG_readname.txt.R1.bed.hg18	4008	1538	0.616267
./GB930180_S80/CATGGTGT_readname.txt.R1.bed.hg18	17985	6583	0.633973
./GB930180_S80/CATGTAGA_readname.txt.R1.bed.hg18	63519	22339	0.64831
./GB930180_S80/CTAAGTGT_readname.txt.R1.bed.hg18	5754	2245	0.609837
./GB930180_S80/CTAGTGTG_readname.txt.R1.bed.hg18	30947	10927	0.646912
./GB930180_S80/GACGTTAA_readname.txt.R1.bed.hg18	18877	6288	0.666896
./GB930180_S80/GAGACCTT_readname.txt.R1.bed.hg18	9527	3423	0.640705
./GB930180_S80/GCTTAGTA_readname.txt.R1.bed.hg18	20209	6925	0.657331
./GB930180_S80/GGTCAATG_readname.txt.R1.bed.hg18	5881	2421	0.588335
./GB930180_S80/GTGAACGT_readname.txt.R1.bed.hg18	6849	2539	0.629289
./GB930180_S80/TAACGTGT_readname.txt.R1.bed.hg18	5881	2266	0.614691
./GB930180_S80/TACACTGT_readname.txt.R1.bed.hg18	55987	19469	0.652259
./GB930180_S80/TACAGTGT_readname.txt.R1.bed.hg18	28606	9917	0.653324
./GB930180_S80/TACGCGTT_readname.txt.R1.bed.hg18	8644	3177	0.632462
./GB930180_S80/TCGATTAA_readname.txt.R1.bed.hg18	5112	1867	0.634781
./GB930180_S80/TCGTCGAT_readname.txt.R1.bed.hg18	23650	8009	0.661353
./GB930180_S80/TCTACTGT_readname.txt.R1.bed.hg18	17401	5986	0.655997
./GB930180_S80/TGATGCGA_readname.txt.R1.bed.hg18	4840	1937	0.599793
./GB930180_S80/TGCAGACA_readname.txt.R1.bed.hg18	5575	4773	0.143857
./GB930180_S80/TTAAGCAT_readname.txt.R1.bed.hg18	8793	3210	0.634937
./GB930181_S81/AACTGCCA_readname.txt.R1.bed.hg18	7842	2991	0.618592
./GB930181_S81/AAGAATCT_readname.txt.R1.bed.hg18	25481	8896	0.650877
./GB930181_S81/ACGTACTC_readname.txt.R1.bed.hg18	15689	5498	0.649563
./GB930181_S81/ATTGGCGT_readname.txt.R1.bed.hg18	10932	4194	0.616356
./GB930181_S81/CACAGTTG_readname.txt.R1.bed.hg18	68060	23976	0.647723
./GB930181_S81/CATGTAGA_readname.txt.R1.bed.hg18	60038	21055	0.649305
./GB930181_S81/CATGTATT_readname.txt.R1.bed.hg18	12301	4540	0.630924
./GB930181_S81/CCTCATGT_readname.txt.R1.bed.hg18	6035	2603	0.568683
./GB930181_S81/CTAAGTGT_readname.txt.R1.bed.hg18	41537	14752	0.644847
./GB930181_S81/CTAGTGTG_readname.txt.R1.bed.hg18	11818	4439	0.624387
./GB930181_S81/CTGCAATC_readname.txt.R1.bed.hg18	32914	12053	0.633803
./GB930181_S81/GATAACCA_readname.txt.R1.bed.hg18	7490	2995	0.600134
./GB930181_S81/GATGGCTT_readname.txt.R1.bed.hg18	7853	3060	0.61034
./GB930181_S81/GCTTAGTA_readname.txt.R1.bed.hg18	32396	11462	0.646191
./GB930181_S81/GTGAACGT_readname.txt.R1.bed.hg18	29162	10030	0.656059
./GB930181_S81/GTTATATC_readname.txt.R1.bed.hg18	12040	4508	0.625581
./GB930181_S81/TAACCAAG_readname.txt.R1.bed.hg18	5373	2503	0.534152
./GB930181_S81/TAACGTGT_readname.txt.R1.bed.hg18	10911	4223	0.612959
./GB930181_S81/TAAGGTGT_readname.txt.R1.bed.hg18	7590	2857	0.623584
./GB930181_S81/TAGCAGTT_readname.txt.R1.bed.hg18	12706	4712	0.629152
./GB930181_S81/TAGTTCTG_readname.txt.R1.bed.hg18	26052	9321	0.642216
./GB930181_S81/TCAAGTTG_readname.txt.R1.bed.hg18	32926	11936	0.63749
./GB930181_S81/TCGATTAA_readname.txt.R1.bed.hg18	20486	7401	0.638729
./GB930181_S81/TCTACTGT_readname.txt.R1.bed.hg18	27995	9566	0.658296
./GB930181_S81/TCTGTTGT_readname.txt.R1.bed.hg18	38995	13953	0.642185
./GB930182_S82/AATGACAG_readname.txt.R1.bed.hg18	18718	6344	0.661075
./GB930182_S82/AGGCTTGA_readname.txt.R1.bed.hg18	17296	6321	0.63454
./GB930182_S82/ATAGATAC_readname.txt.R1.bed.hg18	17975	6605	0.632545
./GB930182_S82/ATATGCTG_readname.txt.R1.bed.hg18	8762	3209	0.633759
./GB930182_S82/ATTAAGCG_readname.txt.R1.bed.hg18	29639	11793	0.602112
./GB930182_S82/CAAGATAT_readname.txt.R1.bed.hg18	65222	23097	0.645871
./GB930182_S82/CAATGTGT_readname.txt.R1.bed.hg18	47152	16054	0.659527
./GB930182_S82/CACAGTTG_readname.txt.R1.bed.hg18	18861	6754	0.641907
./GB930182_S82/CATAACTT_readname.txt.R1.bed.hg18	12471	4376	0.649106
./GB930182_S82/CATGTATT_readname.txt.R1.bed.hg18	7479	2665	0.643669
./GB930182_S82/CTAGTGTG_readname.txt.R1.bed.hg18	15786	5714	0.638034
./GB930182_S82/CTCTGATT_readname.txt.R1.bed.hg18	37047	12734	0.656274
./GB930182_S82/CTGCAATC_readname.txt.R1.bed.hg18	10942	3959	0.638183
./GB930182_S82/CTTCGTTG_readname.txt.R1.bed.hg18	45553	15542	0.658815
./GB930182_S82/GACTAAGA_readname.txt.R1.bed.hg18	9534	3428	0.640445
./GB930182_S82/GATATTGT_readname.txt.R1.bed.hg18	8000	2993	0.625875
./GB930182_S82/GCTTAGTA_readname.txt.R1.bed.hg18	4946	1835	0.628993
./GB930182_S82/GGAACTGT_readname.txt.R1.bed.hg18	33979	11423	0.663822
./GB930182_S82/GTTATATC_readname.txt.R1.bed.hg18	39271	14166	0.639276
./GB930182_S82/TACGCGTT_readname.txt.R1.bed.hg18	8802	3401	0.613611
./GB930182_S82/TCAAGTTG_readname.txt.R1.bed.hg18	14674	5253	0.64202
./GB930182_S82/TCCGGTAT_readname.txt.R1.bed.hg18	17134	6095	0.644275
./GB930182_S82/TCGTCGAT_readname.txt.R1.bed.hg18	8315	2998	0.639447
./GB930182_S82/TGAGCGAA_readname.txt.R1.bed.hg18	5659	2320	0.590034
./GB930183_S83/AAGAATCT_readname.txt.R1.bed.hg18	10122	3738	0.630705
./GB930183_S83/AATGACAG_readname.txt.R1.bed.hg18	28382	10403	0.633465
./GB930183_S83/ACACACGT_readname.txt.R1.bed.hg18	53204	19081	0.641362
./GB930183_S83/AGTTGACC_readname.txt.R1.bed.hg18	49139	18094	0.631779
./GB930183_S83/ATGACACC_readname.txt.R1.bed.hg18	5066	2130	0.57955
./GB930183_S83/ATGACTGT_readname.txt.R1.bed.hg18	7826	2914	0.627651
./GB930183_S83/ATTAAGCG_readname.txt.R1.bed.hg18	8016	3472	0.566866
./GB930183_S83/ATTGGCGT_readname.txt.R1.bed.hg18	8091	3136	0.612409
./GB930183_S83/CAATGTGT_readname.txt.R1.bed.hg18	28030	9931	0.645701
./GB930183_S83/CAGCTCTT_readname.txt.R1.bed.hg18	24155	8788	0.636183
./GB930183_S83/CATGTAGA_readname.txt.R1.bed.hg18	4561	1774	0.61105
./GB930183_S83/CTAGTGTG_readname.txt.R1.bed.hg18	26934	10553	0.60819
./GB930183_S83/CTGACGTT_readname.txt.R1.bed.hg18	8761	3163	0.638968
./GB930183_S83/CTTCGTTG_readname.txt.R1.bed.hg18	7930	2879	0.636948
./GB930183_S83/GATATTGT_readname.txt.R1.bed.hg18	5260	2080	0.604563
./GB930183_S83/GCTTAGTA_readname.txt.R1.bed.hg18	108465	37416	0.655041
./GB930183_S83/GGAACTGT_readname.txt.R1.bed.hg18	8895	3419	0.615627
./GB930183_S83/TAACGTGT_readname.txt.R1.bed.hg18	49203	17122	0.652013
./GB930183_S83/TACAGTGT_readname.txt.R1.bed.hg18	60453	21864	0.638331
./GB930183_S83/TACGCGTT_readname.txt.R1.bed.hg18	27048	9860	0.635463
./GB930183_S83/TCAGCTTG_readname.txt.R1.bed.hg18	7775	2869	0.630997
./GB930183_S83/TGAGCGAA_readname.txt.R1.bed.hg18	11023	4072	0.630591
./GB930183_S83/TGATGCGA_readname.txt.R1.bed.hg18	5653	2212	0.608703
./GB930183_S83/TTAAGCAT_readname.txt.R1.bed.hg18	55650	19586	0.64805
./GB930184_S84/AACTGCCA_readname.txt.R1.bed.hg18	25925	9382	0.63811
./GB930184_S84/ACGTACGT_readname.txt.R1.bed.hg18	7189	3009	0.581444
./GB930184_S84/AGGTTGCT_readname.txt.R1.bed.hg18	8645	3445	0.601504
./GB930184_S84/ATGACACC_readname.txt.R1.bed.hg18	4555	1866	0.59034
./GB930184_S84/ATGACTGT_readname.txt.R1.bed.hg18	11103	4161	0.625236
./GB930184_S84/ATTGGCGT_readname.txt.R1.bed.hg18	49393	17411	0.647501
./GB930184_S84/CAAGGTCA_readname.txt.R1.bed.hg18	32022	10906	0.659422
./GB930184_S84/CAAGTCAC_readname.txt.R1.bed.hg18	51224	17772	0.653053
./GB930184_S84/CATATGCT_readname.txt.R1.bed.hg18	2837	1816	0.359887
./GB930184_S84/CATGTAGA_readname.txt.R1.bed.hg18	9518	3386	0.644253
./GB930184_S84/CATGTATT_readname.txt.R1.bed.hg18	7145	2654	0.628551
./GB930184_S84/CGAGAATG_readname.txt.R1.bed.hg18	15092	5836	0.613305
./GB930184_S84/CGATTACA_readname.txt.R1.bed.hg18	8823	3489	0.604556
./GB930184_S84/CTAAGTGT_readname.txt.R1.bed.hg18	36689	13283	0.637957
./GB930184_S84/CTAGTGTG_readname.txt.R1.bed.hg18	34121	12508	0.633422
./GB930184_S84/GACTAAGA_readname.txt.R1.bed.hg18	48306	16652	0.655281
./GB930184_S84/GAGACCTT_readname.txt.R1.bed.hg18	34701	12425	0.641941
./GB930184_S84/GCGTAATT_readname.txt.R1.bed.hg18	19280	6761	0.649326
./GB930184_S84/TACACTGT_readname.txt.R1.bed.hg18	27021	9924	0.63273
./GB930184_S84/TACAGTGT_readname.txt.R1.bed.hg18	29761	11209	0.623366
./GB930184_S84/TAGACGGA_readname.txt.R1.bed.hg18	25525	9342	0.634006
./GB930184_S84/TCCGGTAT_readname.txt.R1.bed.hg18	23031	8168	0.645348
./GB930184_S84/TGATGCGA_readname.txt.R1.bed.hg18	13340	4994	0.625637
./GB930184_S84/TGGCGTAT_readname.txt.R1.bed.hg18	8865	3443	0.611619
./GB930184_S84/TTAAGCAT_readname.txt.R1.bed.hg18	5936	2270	0.617588
./GB930185_S85/AAGAGGTT_readname.txt.R1.bed.hg18	10824	3819	0.647173
./GB930185_S85/AGAGTTGT_readname.txt.R1.bed.hg18	8057	3297	0.590791
./GB930185_S85/ATACGACT_readname.txt.R1.bed.hg18	5589	2094	0.625335
./GB930185_S85/ATAGATAC_readname.txt.R1.bed.hg18	50615	17450	0.655241
./GB930185_S85/ATCTGATG_readname.txt.R1.bed.hg18	42791	14673	0.657101
./GB930185_S85/ATGACACC_readname.txt.R1.bed.hg18	26697	9147	0.657377
./GB930185_S85/ATGGACTG_readname.txt.R1.bed.hg18	30634	10318	0.663185
./GB930185_S85/ATGGCTGT_readname.txt.R1.bed.hg18	8012	2782	0.652771
./GB930185_S85/CAGCTCTT_readname.txt.R1.bed.hg18	31675	11132	0.648556
./GB930185_S85/CCTCATGT_readname.txt.R1.bed.hg18	19445	7042	0.63785
./GB930185_S85/CGAGAATG_readname.txt.R1.bed.hg18	32657	11238	0.655878
./GB930185_S85/CTAAGTGT_readname.txt.R1.bed.hg18	20122	7016	0.651327
./GB930185_S85/CTAGTGTG_readname.txt.R1.bed.hg18	60055	20422	0.659945
./GB930185_S85/CTTCGTTG_readname.txt.R1.bed.hg18	26985	9054	0.66448
./GB930185_S85/GACTAAGA_readname.txt.R1.bed.hg18	38240	12737	0.666919
./GB930185_S85/GACTGTGT_readname.txt.R1.bed.hg18	27493	9224	0.664496
./GB930185_S85/GATAACCA_readname.txt.R1.bed.hg18	49066	16622	0.661232
./GB930185_S85/GATGGCTT_readname.txt.R1.bed.hg18	16634	5728	0.655645
./GB930185_S85/GGAACTGT_readname.txt.R1.bed.hg18	15860	5802	0.634174
./GB930185_S85/GTTATATC_readname.txt.R1.bed.hg18	14100	5319	0.622766
./GB930185_S85/TAGCAGTT_readname.txt.R1.bed.hg18	6082	2431	0.600296
./GB930185_S85/TAGTTCTG_readname.txt.R1.bed.hg18	56385	18932	0.664237
./GB930185_S85/TCCGGTAT_readname.txt.R1.bed.hg18	85618	28262	0.669906
./GB930185_S85/TCGTTAGC_readname.txt.R1.bed.hg18	54911	18834	0.657009
./GB930185_S85/TGGCGTAT_readname.txt.R1.bed.hg18	8301	3151	0.620407
./GB930186_S86/AAGAATCT_readname.txt.R1.bed.hg18	26013	9116	0.64956
./GB930186_S86/AGAATCAG_readname.txt.R1.bed.hg18	5838	2855	0.510963
./GB930186_S86/AGAGTTGT_readname.txt.R1.bed.hg18	8053	2951	0.633553
./GB930186_S86/ATATGCTG_readname.txt.R1.bed.hg18	10354	3880	0.625266
./GB930186_S86/CAAGATAT_readname.txt.R1.bed.hg18	15001	5169	0.655423
./GB930186_S86/CAATGTGT_readname.txt.R1.bed.hg18	51515	18279	0.645171
./GB930186_S86/CACAGTTG_readname.txt.R1.bed.hg18	73694	25884	0.648764
./GB930186_S86/CACTCTTG_readname.txt.R1.bed.hg18	52043	18190	0.650481
./GB930186_S86/CAGTGATG_readname.txt.R1.bed.hg18	15017	5559	0.62982
./GB930186_S86/CTTCGTTG_readname.txt.R1.bed.hg18	24191	8542	0.646893
./GB930186_S86/GAGCGATA_readname.txt.R1.bed.hg18	37230	12398	0.666989
./GB930186_S86/GCTTAGTA_readname.txt.R1.bed.hg18	10643	3836	0.639575
./GB930186_S86/TAAGGTGT_readname.txt.R1.bed.hg18	11309	4022	0.644354
./GB930186_S86/TACGCGTT_readname.txt.R1.bed.hg18	32779	11597	0.646206
./GB930186_S86/TCCGGTAT_readname.txt.R1.bed.hg18	47795	15959	0.666095
./GB930186_S86/TCCTGCTG_readname.txt.R1.bed.hg18	18618	6365	0.658127
./GB930186_S86/TCGTCGAT_readname.txt.R1.bed.hg18	18800	6461	0.65633
./GB930186_S86/TCTACTGT_readname.txt.R1.bed.hg18	32419	11175	0.655295
./GB930186_S86/TGATGCGA_readname.txt.R1.bed.hg18	5559	2098	0.622594
./GB930186_S86/TGCAGACA_readname.txt.R1.bed.hg18	14474	4944	0.658422
./GB930187_S87/AAGAATCT_readname.txt.R1.bed.hg18	51496	19002	0.631
./GB930187_S87/AGAGTTGT_readname.txt.R1.bed.hg18	69137	24294	0.648611
./GB930187_S87/ATTAAGCG_readname.txt.R1.bed.hg18	7508	3023	0.597363
./GB930187_S87/ATTGGCGT_readname.txt.R1.bed.hg18	25475	9013	0.646202
./GB930187_S87/CAAGTCAC_readname.txt.R1.bed.hg18	6583	2686	0.591979
./GB930187_S87/CAATGTGT_readname.txt.R1.bed.hg18	33856	11849	0.650018
./GB930187_S87/CACTCTTG_readname.txt.R1.bed.hg18	5761	2162	0.624718
./GB930187_S87/CATGTAGA_readname.txt.R1.bed.hg18	31081	10612	0.65857
./GB930187_S87/CTCTGATT_readname.txt.R1.bed.hg18	32307	11533	0.643019
./GB930187_S87/CTGCAATC_readname.txt.R1.bed.hg18	28735	10578	0.631878
./GB930187_S87/GAGACCTT_readname.txt.R1.bed.hg18	6464	2588	0.599629
./GB930187_S87/GCTTAGTA_readname.txt.R1.bed.hg18	24091	8621	0.642149
./GB930187_S87/GTACCGAT_readname.txt.R1.bed.hg18	10978	3995	0.63609
./GB930187_S87/GTGAACGT_readname.txt.R1.bed.hg18	33163	11494	0.653409
./GB930187_S87/TAACGTGT_readname.txt.R1.bed.hg18	19358	7006	0.638082
./GB930187_S87/TACGCGTT_readname.txt.R1.bed.hg18	56033	19414	0.653526
./GB930187_S87/TCATCGTG_readname.txt.R1.bed.hg18	8266	2986	0.638761
./GB930187_S87/TCTACTGT_readname.txt.R1.bed.hg18	25672	9480	0.630726
./GB930187_S87/TCTGTTGT_readname.txt.R1.bed.hg18	48468	17002	0.649212
./GB930187_S87/TGGCGTAT_readname.txt.R1.bed.hg18	11517	4348	0.622471
./GB930188_S88/AATCGGAT_readname.txt.R1.bed.hg18	47819	16535	0.654217
./GB930188_S88/ACGTACGT_readname.txt.R1.bed.hg18	9777	3338	0.658586
./GB930188_S88/AGGTTGCT_readname.txt.R1.bed.hg18	37141	12286	0.669207
./GB930188_S88/AGTTGACC_readname.txt.R1.bed.hg18	26089	8700	0.666526
./GB930188_S88/ATTGGCGT_readname.txt.R1.bed.hg18	43119	14795	0.65688
./GB930188_S88/CAAGATAT_readname.txt.R1.bed.hg18	7342	2774	0.622174
./GB930188_S88/CAATGTGT_readname.txt.R1.bed.hg18	51297	17583	0.657231
./GB930188_S88/CACTCTTG_readname.txt.R1.bed.hg18	8020	2993	0.626808
./GB930188_S88/CGATTACA_readname.txt.R1.bed.hg18	24475	8492	0.653034
./GB930188_S88/CTAAGTGT_readname.txt.R1.bed.hg18	18081	6456	0.64294
./GB930188_S88/CTGCAATC_readname.txt.R1.bed.hg18	78843	26960	0.658055
./GB930188_S88/GACTGTGT_readname.txt.R1.bed.hg18	111593	38447	0.655471
./GB930188_S88/GAGACCTT_readname.txt.R1.bed.hg18	46176	15724	0.659477
./GB930188_S88/GTGAACGT_readname.txt.R1.bed.hg18	19707	6665	0.661795
./GB930188_S88/TACACTGT_readname.txt.R1.bed.hg18	9499	3313	0.651226
./GB930188_S88/TCAAGTTG_readname.txt.R1.bed.hg18	7988	2870	0.640711
./GB930188_S88/TCAGCTTG_readname.txt.R1.bed.hg18	6492	2430	0.625693
./GB930188_S88/TCATCGTG_readname.txt.R1.bed.hg18	17281	6079	0.648226
./GB930188_S88/TGGACATG_readname.txt.R1.bed.hg18	26944	9055	0.663933
./GB930188_S88/TGGCGTAT_readname.txt.R1.bed.hg18	23801	9003	0.621739
./GB930188_S88/TTCACGAT_readname.txt.R1.bed.hg18	20963	7041	0.664123
./GB930189_S89/AATCGGAT_readname.txt.R1.bed.hg18	8732	3256	0.627119
./GB930189_S89/AGGTTGCT_readname.txt.R1.bed.hg18	9496	3596	0.621314
./GB930189_S89/ATGACACC_readname.txt.R1.bed.hg18	4644	2123	0.542851
./GB930189_S89/ATGGACTG_readname.txt.R1.bed.hg18	75243	26487	0.647981
./GB930189_S89/CAATTCGT_readname.txt.R1.bed.hg18	23548	8578	0.635723
./GB930189_S89/CAGTGATG_readname.txt.R1.bed.hg18	41487	14546	0.649384
./GB930189_S89/CATAACTT_readname.txt.R1.bed.hg18	11897	4334	0.635706
./GB930189_S89/CATATGCT_readname.txt.R1.bed.hg18	22573	10684	0.526691
./GB930189_S89/CCTAGTAG_readname.txt.R1.bed.hg18	2014	1526	0.242304
./GB930189_S89/CCTCATGT_readname.txt.R1.bed.hg18	4979	2130	0.572203
./GB930189_S89/CTGCAATC_readname.txt.R1.bed.hg18	12321	4695	0.618943
./GB930189_S89/GACTAAGA_readname.txt.R1.bed.hg18	4643	1860	0.599397
./GB930189_S89/GATAACCA_readname.txt.R1.bed.hg18	26816	9775	0.635479
./GB930189_S89/GCGTAATT_readname.txt.R1.bed.hg18	18925	6910	0.634875
./GB930189_S89/GGAACTGT_readname.txt.R1.bed.hg18	29489	10319	0.650073
./GB930189_S89/GTGAACGT_readname.txt.R1.bed.hg18	7668	2828	0.631195
./GB930189_S89/GTTATATC_readname.txt.R1.bed.hg18	5121	1994	0.610623
./GB930189_S89/TACACTGT_readname.txt.R1.bed.hg18	11795	4150	0.648156
./GB930189_S89/TAGTTCTG_readname.txt.R1.bed.hg18	22871	8979	0.607407
./GB930189_S89/TCATCGTG_readname.txt.R1.bed.hg18	12088	4361	0.639229
./GB930189_S89/TCCGGTAT_readname.txt.R1.bed.hg18	99619	35061	0.648049
./GB930189_S89/TCGTTAGC_readname.txt.R1.bed.hg18	7945	2915	0.633103
./GB930189_S89/TGATGCGA_readname.txt.R1.bed.hg18	27618	9950	0.639728
./GB930190_S90/AAGAATCT_readname.txt.R1.bed.hg18	11243	4017	0.642711
./GB930190_S90/AATGACAG_readname.txt.R1.bed.hg18	42300	14666	0.653286
./GB930190_S90/AGAATCAG_readname.txt.R1.bed.hg18	70880	24071	0.660398
./GB930190_S90/AGAGTTGT_readname.txt.R1.bed.hg18	31302	10669	0.659159
./GB930190_S90/ATGACACC_readname.txt.R1.bed.hg18	13860	5323	0.615945
./GB930190_S90/ATGACTGT_readname.txt.R1.bed.hg18	22902	7879	0.655969
./GB930190_S90/CAATGTGT_readname.txt.R1.bed.hg18	65102	21626	0.667814
./GB930190_S90/CACTCTTG_readname.txt.R1.bed.hg18	110412	37690	0.658642
./GB930190_S90/CATAACTT_readname.txt.R1.bed.hg18	4928	1836	0.627435
./GB930190_S90/CGTAATTA_readname.txt.R1.bed.hg18	4724	2796	0.408129
./GB930190_S90/CTTCGTTG_readname.txt.R1.bed.hg18	10865	3794	0.650805
./GB930190_S90/GGATCATC_readname.txt.R1.bed.hg18	8223	3094	0.623738
./GB930190_S90/GTTATATC_readname.txt.R1.bed.hg18	33252	11237	0.662065
./GB930190_S90/TAACGTGT_readname.txt.R1.bed.hg18	32370	11088	0.657461
./GB930190_S90/TAGTTCTG_readname.txt.R1.bed.hg18	6019	2477	0.58847
./GB930190_S90/TCATCGTG_readname.txt.R1.bed.hg18	8759	3155	0.639799
./GB930190_S90/TCCGGTAT_readname.txt.R1.bed.hg18	4849	2132	0.560322
./GB930190_S90/TGAGCGAA_readname.txt.R1.bed.hg18	6781	2619	0.613774
./GB930190_S90/TGATGCGA_readname.txt.R1.bed.hg18	24511	8270	0.6626
./GB930191_S91/AACTGCCA_readname.txt.R1.bed.hg18	24799	8828	0.644018
./GB930191_S91/ACGTACTC_readname.txt.R1.bed.hg18	5729	2062	0.640077
./GB930191_S91/AGTTGACC_readname.txt.R1.bed.hg18	25940	9366	0.638936
./GB930191_S91/ATATGCTG_readname.txt.R1.bed.hg18	19210	7187	0.625872
./GB930191_S91/ATGACACC_readname.txt.R1.bed.hg18	5336	2117	0.603261
./GB930191_S91/ATTGGCGT_readname.txt.R1.bed.hg18	9854	3646	0.629998
./GB930191_S91/CAAGTCAC_readname.txt.R1.bed.hg18	9775	3917	0.599284
./GB930191_S91/CAATTCGT_readname.txt.R1.bed.hg18	37057	13272	0.641849
./GB930191_S91/CACTCTTG_readname.txt.R1.bed.hg18	8912	3156	0.645871
./GB930191_S91/CAGTGATG_readname.txt.R1.bed.hg18	11504	4056	0.647427
./GB930191_S91/CATGGTGT_readname.txt.R1.bed.hg18	17782	6524	0.633112
./GB930191_S91/CATGTAGA_readname.txt.R1.bed.hg18	62862	22388	0.643855
./GB930191_S91/CCTCATGT_readname.txt.R1.bed.hg18	51551	18167	0.647592
./GB930191_S91/CGAGAATG_readname.txt.R1.bed.hg18	4491	1726	0.615676
./GB930191_S91/CTTCGTTG_readname.txt.R1.bed.hg18	9443	3417	0.638145
./GB930191_S91/GCTTAGTA_readname.txt.R1.bed.hg18	44420	15578	0.649302
./GB930191_S91/GGTCAATG_readname.txt.R1.bed.hg18	6547	2406	0.632503
./GB930191_S91/TAAGGTGT_readname.txt.R1.bed.hg18	14457	5443	0.623504
./GB930191_S91/TACAGTGT_readname.txt.R1.bed.hg18	12175	4297	0.647064
./GB930191_S91/TCAAGTTG_readname.txt.R1.bed.hg18	36581	13162	0.640196
./GB930191_S91/TCATCGTG_readname.txt.R1.bed.hg18	9396	3347	0.643785
./GB930191_S91/TCCTGCTG_readname.txt.R1.bed.hg18	14709	5478	0.627575
./GB930191_S91/TCGTTAGC_readname.txt.R1.bed.hg18	29481	10104	0.657271
./GB930191_S91/TGCAGACA_readname.txt.R1.bed.hg18	7913	2826	0.642866
./GB930191_S91/TTCACGAT_readname.txt.R1.bed.hg18	7156	2815	0.606624
./GB930192_S92/AACTGCCA_readname.txt.R1.bed.hg18	24546	9187	0.625723
./GB930192_S92/AATCGGAT_readname.txt.R1.bed.hg18	43136	15423	0.642456
./GB930192_S92/ACGTACGT_readname.txt.R1.bed.hg18	15751	5636	0.642181
./GB930192_S92/AGAGTTGT_readname.txt.R1.bed.hg18	54279	18900	0.651799
./GB930192_S92/AGTTGACC_readname.txt.R1.bed.hg18	37379	13682	0.633966
./GB930192_S92/ATGGACTG_readname.txt.R1.bed.hg18	53845	18500	0.656421
./GB930192_S92/CAAGTCAC_readname.txt.R1.bed.hg18	14072	5116	0.636441
./GB930192_S92/CACTCTTG_readname.txt.R1.bed.hg18	5271	2198	0.583001
./GB930192_S92/CATGTAGA_readname.txt.R1.bed.hg18	52410	18300	0.65083
./GB930192_S92/CATGTGTG_readname.txt.R1.bed.hg18	5001	2231	0.553889
./GB930192_S92/CTAGTGTG_readname.txt.R1.bed.hg18	57141	20494	0.641343
./GB930192_S92/GACGTTAA_readname.txt.R1.bed.hg18	6300	2396	0.619683
./GB930192_S92/GACTAAGA_readname.txt.R1.bed.hg18	85510	29697	0.652707
./GB930192_S92/GATAACCA_readname.txt.R1.bed.hg18	28354	10176	0.641109
./GB930192_S92/TACAGTGT_readname.txt.R1.bed.hg18	6222	2542	0.59145
./GB930192_S92/TAGACGGA_readname.txt.R1.bed.hg18	4835	2191	0.546846
./GB930192_S92/TAGTTCTG_readname.txt.R1.bed.hg18	5701	2369	0.584459
./GB930192_S92/TCATCGTG_readname.txt.R1.bed.hg18	7317	2820	0.614596
./GB930192_S92/TCCGGTAT_readname.txt.R1.bed.hg18	14128	5215	0.630875
./GB930192_S92/TCGATTAA_readname.txt.R1.bed.hg18	7991	3378	0.577274
./GB930192_S92/TCGTCGAT_readname.txt.R1.bed.hg18	9894	3739	0.622094
./GB930192_S92/TCTACTGT_readname.txt.R1.bed.hg18	10330	4002	0.612585
./GB930192_S92/TGATGCGA_readname.txt.R1.bed.hg18	18869	6949	0.631724
./GB930192_S92/TGCAGACA_readname.txt.R1.bed.hg18	7462	3308	0.556687
./GB930192_S92/TTAAGCAT_readname.txt.R1.bed.hg18	13672	5685	0.584187
./GB930193_S93/ACGTACGT_readname.txt.R1.bed.hg18	62382	20404	0.672918
./GB930193_S93/ATATGCTG_readname.txt.R1.bed.hg18	70289	24479	0.651738
./GB930193_S93/CAAGTCAC_readname.txt.R1.bed.hg18	7684	2821	0.632874
./GB930193_S93/CACAGTTG_readname.txt.R1.bed.hg18	10969	4090	0.627131
./GB930193_S93/CCTCATGT_readname.txt.R1.bed.hg18	28570	9715	0.659958
./GB930193_S93/CTTCGTTG_readname.txt.R1.bed.hg18	12343	4675	0.621243
./GB930193_S93/GATATTGT_readname.txt.R1.bed.hg18	8677	3324	0.616918
./GB930193_S93/GCGTAATT_readname.txt.R1.bed.hg18	10140	3445	0.660256
./GB930193_S93/GGAACTGT_readname.txt.R1.bed.hg18	15414	5392	0.650188
./GB930193_S93/GGATCATC_readname.txt.R1.bed.hg18	98506	33528	0.659635
./GB930193_S93/GGTCAATG_readname.txt.R1.bed.hg18	11817	4524	0.617162
./GB930193_S93/GTACCGAT_readname.txt.R1.bed.hg18	42959	14679	0.658302
./GB930193_S93/GTCTCCTA_readname.txt.R1.bed.hg18	9989	3775	0.622084
./GB930193_S93/TAAGGTGT_readname.txt.R1.bed.hg18	11020	3981	0.638748
./GB930193_S93/TACACTGT_readname.txt.R1.bed.hg18	51417	17285	0.663827
./GB930193_S93/TACGCGTT_readname.txt.R1.bed.hg18	8606	3027	0.648269
./GB930193_S93/TCAAGTTG_readname.txt.R1.bed.hg18	13445	4669	0.652733
./GB930193_S93/TCCTGCTG_readname.txt.R1.bed.hg18	17807	6081	0.658505
./GB930193_S93/TCGTTAGC_readname.txt.R1.bed.hg18	29269	9563	0.673272
./GB930193_S93/TGATGCGA_readname.txt.R1.bed.hg18	4132	1542	0.626815
./GB930193_S93/TGCAGACA_readname.txt.R1.bed.hg18	43648	14555	0.666537
./GB930193_S93/TTAAGCAT_readname.txt.R1.bed.hg18	10654	4090	0.616107
./GB930194_S94/AATGACAG_readname.txt.R1.bed.hg18	2898	1561	0.461353
./GB930194_S94/ACTGCATG_readname.txt.R1.bed.hg18	4902	1786	0.635659
./GB930194_S94/ATAGATAC_readname.txt.R1.bed.hg18	7168	2608	0.636161
./GB930194_S94/ATATGCTG_readname.txt.R1.bed.hg18	4843	2034	0.580012
./GB930194_S94/CAGCTCTT_readname.txt.R1.bed.hg18	20391	7244	0.644745
./GB930194_S94/CTAAGTGT_readname.txt.R1.bed.hg18	50652	18105	0.642561
./GB930194_S94/CTCTGATT_readname.txt.R1.bed.hg18	9126	3230	0.646066
./GB930194_S94/CTGCAATC_readname.txt.R1.bed.hg18	67733	23059	0.65956
./GB930194_S94/CTTCGTTG_readname.txt.R1.bed.hg18	27984	9920	0.645512
./GB930194_S94/GACGTTAA_readname.txt.R1.bed.hg18	16480	5429	0.67057
./GB930194_S94/GGTCAATG_readname.txt.R1.bed.hg18	5643	2354	0.582846
./GB930194_S94/GTACCGAT_readname.txt.R1.bed.hg18	7107	2567	0.638807
./GB930194_S94/TAGCAGTT_readname.txt.R1.bed.hg18	6608	2312	0.650121
./GB930194_S94/TCATCGTG_readname.txt.R1.bed.hg18	9557	3585	0.624882
./GB930194_S94/TCCTGCTG_readname.txt.R1.bed.hg18	7831	2781	0.644873
./GB930194_S94/TCGTTAGC_readname.txt.R1.bed.hg18	73955	25143	0.660023
./GB930194_S94/TCTGTTGT_readname.txt.R1.bed.hg18	8871	3413	0.615263
./GB930194_S94/TGGCGTAT_readname.txt.R1.bed.hg18	33151	11413	0.655727
./GB930194_S94/TTAAGCAT_readname.txt.R1.bed.hg18	35609	12419	0.65124
./GB930194_S94/TTCACGAT_readname.txt.R1.bed.hg18	9709	4002	0.587805
./GB930195_S95/AACTGCCA_readname.txt.R1.bed.hg18	73372	25439	0.653287
./GB930195_S95/AAGAATCT_readname.txt.R1.bed.hg18	10053	3762	0.625783
./GB930195_S95/AGTTGACC_readname.txt.R1.bed.hg18	12356	4229	0.657737
./GB930195_S95/ATAGATAC_readname.txt.R1.bed.hg18	32619	11085	0.660167
./GB930195_S95/ATCTGATG_readname.txt.R1.bed.hg18	10231	3871	0.62164
./GB930195_S95/ATTGGCGT_readname.txt.R1.bed.hg18	6464	2730	0.577661
./GB930195_S95/CAGCTCTT_readname.txt.R1.bed.hg18	6796	2501	0.631989
./GB930195_S95/CATGTAGA_readname.txt.R1.bed.hg18	8057	3310	0.589177
./GB930195_S95/CGAACTAC_readname.txt.R1.bed.hg18	10377	4219	0.593428
./GB930195_S95/CGAGAATG_readname.txt.R1.bed.hg18	22993	8166	0.644848
./GB930195_S95/CTCTGATT_readname.txt.R1.bed.hg18	4336	1667	0.615544
./GB930195_S95/CTGCAATC_readname.txt.R1.bed.hg18	13359	4786	0.64174
./GB930195_S95/GATATTGT_readname.txt.R1.bed.hg18	72016	24607	0.658312
./GB930195_S95/GATGGCTT_readname.txt.R1.bed.hg18	28431	9932	0.650663
./GB930195_S95/GGAACTGT_readname.txt.R1.bed.hg18	67098	22560	0.663775
./GB930195_S95/GGTCAATG_readname.txt.R1.bed.hg18	11042	4275	0.612842
./GB930195_S95/GTACCGAT_readname.txt.R1.bed.hg18	78876	25859	0.672156
./GB930195_S95/GTCTCCTA_readname.txt.R1.bed.hg18	83368	29352	0.647922
./GB930195_S95/TACAGTGT_readname.txt.R1.bed.hg18	51957	17958	0.654368
./GB930195_S95/TAGCAGTT_readname.txt.R1.bed.hg18	6573	2364	0.640347
./GB930195_S95/TCATCGTG_readname.txt.R1.bed.hg18	1655	1515	0.0845921
./GB930195_S95/TCGATTAA_readname.txt.R1.bed.hg18	26622	9260	0.652167
./GB930195_S95/TCTACTGT_readname.txt.R1.bed.hg18	64791	21880	0.662299
./GB930195_S95/TGATGCGA_readname.txt.R1.bed.hg18	33950	11567	0.659293
./GB930195_S95/TTCACGAT_readname.txt.R1.bed.hg18	60572	19866	0.672027
./GB930196_S96/AAGAGGTT_readname.txt.R1.bed.hg18	38796	13591	0.64968
./GB930196_S96/AATGACAG_readname.txt.R1.bed.hg18	3550	1678	0.527324
./GB930196_S96/ACGTACTC_readname.txt.R1.bed.hg18	11741	4122	0.648923
./GB930196_S96/AGAATCAG_readname.txt.R1.bed.hg18	5810	2249	0.612909
./GB930196_S96/ATACGACT_readname.txt.R1.bed.hg18	8385	3246	0.61288
./GB930196_S96/ATAGATAC_readname.txt.R1.bed.hg18	11299	4131	0.634392
./GB930196_S96/ATATGCTG_readname.txt.R1.bed.hg18	36730	13128	0.642581
./GB930196_S96/CAAGGTCA_readname.txt.R1.bed.hg18	24413	8558	0.649449
./GB930196_S96/CACAGTTG_readname.txt.R1.bed.hg18	24593	8869	0.639369
./GB930196_S96/CATGGTGT_readname.txt.R1.bed.hg18	9016	3401	0.622782
./GB930196_S96/CATGTAGA_readname.txt.R1.bed.hg18	35184	12105	0.655952
./GB930196_S96/CTCTGATT_readname.txt.R1.bed.hg18	6394	2561	0.599468
./GB930196_S96/CTGACGTT_readname.txt.R1.bed.hg18	6871	2495	0.63688
./GB930196_S96/CTGCAATC_readname.txt.R1.bed.hg18	6769	2627	0.611907
./GB930196_S96/GAGCGATA_readname.txt.R1.bed.hg18	10946	4141	0.621688
./GB930196_S96/GGAACTGT_readname.txt.R1.bed.hg18	48610	17514	0.639704
[truncated: 7,875 more rows]

## Sheet:  scH3K27me3 480 wells
Well index	total reads	mapped reads	mappability
GB941501_S1	3361432	2347718	0.698428
GB941502_S2	1705391	1113178	0.652741
GB941503_S3	2021165	1336076	0.661043
GB941504_S4	1985523	1346923	0.678372
GB941505_S5	1262588	803643	0.636505
GB941506_S6	2383322	1597189	0.670152
GB941507_S7	2605844	909228	0.348919
GB941508_S8	1276786	823613	0.645067
GB941509_S9	1295249	793034	0.612264
GB941510_S10	1661771	1079745	0.649756
GB941511_S11	3144418	1338536	0.425686
GB941512_S12	2078605	1184833	0.570014
GB941513_S13	2158927	1407512	0.65195
GB941514_S14	1951160	1282764	0.657437
GB941515_S15	2282857	1572784	0.688954
GB941516_S16	1998366	1355978	0.678543
GB941517_S17	1760048	1158306	0.65811
GB941518_S18	2581473	1681726	0.65146
GB941519_S19	1829704	1224220	0.669081
GB941520_S20	2020757	1280723	0.633784
GB941521_S21	1423769	975670	0.685273
GB941522_S22	1544038	1016953	0.658632
GB941523_S23	2818804	1270083	0.450575
GB941524_S24	2442431	1466812	0.600554
GB941525_S25	1948843	1244706	0.63869
GB941526_S26	2780381	1799941	0.647372
GB941527_S27	1003714	661311	0.658864
GB941528_S28	1951540	1299083	0.665671
GB941529_S29	1702549	1095619	0.643517
GB941530_S30	2937232	1968608	0.670226
GB941531_S31	1589921	1065376	0.670081
GB941532_S32	2247556	1205495	0.536358
GB941533_S33	1337789	831063	0.621221
GB941534_S34	1663683	1053633	0.633314
GB941535_S35	1613127	1078851	0.668795
GB941536_S36	2839468	1659315	0.584375
GB941537_S37	804	471	0.585821
GB941538_S38	775	142	0.183226
GB941539_S39	1709	791	0.462844
GB941540_S40	466	218	0.467811
GB941541_S41	1198216	800714	0.668255
GB941542_S42	84	45	0.535714
GB941543_S43	63	18	0.285714
GB941544_S44	1860232	1203604	0.647018
GB941545_S45	2372	1419	0.598229
GB941546_S46	344	220	0.639535
GB941547_S47	245	118	0.481633
GB941548_S48	44	8	0.181818
GB941549_S49	1805535	1204940	0.667359
GB941550_S50	1343125	903314	0.672546
GB941551_S51	2028934	1419309	0.699534
GB941552_S52	2259924	1620054	0.716862
GB941553_S53	1428746	943875	0.660632
GB941554_S54	763943	500050	0.654565
GB941555_S55	1455655	910188	0.625277
GB941556_S56	1948244	1239342	0.636133
GB941557_S57	1203838	769788	0.639445
GB941558_S58	1533158	1035475	0.675387
GB941559_S59	1431192	920133	0.642914
GB941560_S60	1754325	1202694	0.685559
GB941561_S61	2424052	1650551	0.680906
GB941562_S62	2258038	1516066	0.671409
GB941563_S63	1728839	968373	0.560129
GB941564_S64	1441343	814293	0.564954
GB941565_S65	1731837	1020767	0.589413
GB941566_S66	1534336	1036556	0.675573
GB941567_S67	2082055	1410481	0.677447
GB941568_S68	1572173	877327	0.558035
GB941569_S69	1936769	1287941	0.664995
GB941570_S70	1059904	677836	0.639526
GB941571_S71	1550882	984402	0.634737
GB941572_S72	1477963	1017669	0.688562
GB941573_S73	1645610	1118940	0.679955
GB941574_S74	1600692	1069369	0.668067
GB941575_S75	1148576	735335	0.640214
GB941576_S76	1787818	1207557	0.675436
GB941577_S77	1888448	1299916	0.688351
GB941578_S78	1845035	1206968	0.654171
GB941579_S79	2502271	1715002	0.685378
GB941580_S80	1135161	741760	0.65344
GB941581_S81	1243406	816297	0.656501
GB941582_S82	1832904	1244553	0.679006
GB941583_S83	1337739	863599	0.645566
GB941584_S84	1436342	960944	0.669022
GB941585_S85	2655277	1796461	0.676563
GB941586_S86	1926274	1328123	0.689478
GB941587_S87	1844891	1273464	0.690265
GB941588_S88	2088409	1436457	0.687824
GB941589_S89	1165962	770559	0.660878
GB941590_S90	1497866	998400	0.666548
GB941591_S91	1340921	873571	0.651471
GB941592_S92	2309995	1401045	0.606514
GB941593_S93	2612106	1751282	0.670448
GB941594_S94	1302144	830214	0.637575
GB941595_S95	1514832	901299	0.594983
GB941596_S96	1141105	761086	0.666973
GB941601_S97	3567431	2228288	0.62462
GB941602_S98	3488578	1823985	0.522845
GB941603_S99	3524587	2177701	0.61786
GB941604_S100	2793605	1645433	0.589
GB941605_S101	4188357	2589158	0.61818
GB941606_S102	4395432	2695668	0.613289
GB941607_S103	2897642	1500372	0.517791
GB941608_S104	5032124	3034198	0.602966
GB941609_S105	4604784	2846742	0.618214
GB941610_S106	2676210	1527533	0.570782
GB941611_S107	5350142	3071118	0.574026
GB941612_S108	4083772	2471264	0.605143
GB941613_S109	2438432	1256934	0.515468
GB941614_S110	4436404	2619340	0.59042
GB941615_S111	3948617	2460121	0.623034
GB941616_S112	3563233	2128922	0.597469
GB941617_S113	2022014	1126323	0.55703
GB941618_S114	3497369	2072749	0.59266
GB941619_S115	3673921	2249008	0.612155
GB941620_S116	3713654	2135022	0.574911
GB941621_S117	2315401	1348137	0.582248
GB941622_S118	3737698	2340209	0.62611
GB941623_S119	2742787	1686575	0.614913
GB941624_S120	2719316	1492185	0.548735
GB941625_S121	3360584	1950614	0.580439
GB941626_S122	3656745	2186508	0.597938
GB941627_S123	3130125	2001939	0.639572
GB941628_S124	3766543	2106929	0.55938
GB941629_S125	3686589	2220061	0.602199
GB941630_S126	2741342	1589005	0.579645
GB941631_S127	3557491	2260473	0.635412
GB941632_S128	4485232	2446158	0.54538
GB941633_S129	3491471	2058709	0.589639
GB941634_S130	3103470	1742571	0.561491
GB941635_S131	3370458	2055338	0.60981
GB941636_S132	3713870	2114087	0.569241
GB941637_S133	1201	639	0.532057
GB941638_S134	1505	275	0.182724
GB941639_S135	2752	1505	0.546875
GB941640_S136	510	210	0.411765
GB941641_S137	2280527	1079751	0.473466
GB941642_S138	174	90	0.517241
GB941643_S139	140	40	0.285714
GB941644_S140	3771198	2170324	0.5755
GB941645_S141	4172	2289	0.548658
GB941646_S142	601	316	0.52579
GB941647_S143	546	229	0.419414
GB941648_S144	110	28	0.254545
GB941649_S145	2707114	1654842	0.611294
GB941650_S146	3604659	2236295	0.62039
GB941651_S147	2101688	1226850	0.583745
GB941652_S148	2573752	1507078	0.585557
GB941653_S149	2917348	1729020	0.592668
GB941654_S150	1695396	958284	0.565227
GB941655_S151	3073100	1549482	0.504208
GB941656_S152	3846018	2208670	0.574274
GB941657_S153	3025786	1662244	0.549359
GB941658_S154	3746231	1501672	0.400849
GB941659_S155	2147532	1216350	0.566394
GB941660_S156	3538263	2219631	0.627322
GB941661_S157	1698864	894053	0.526265
GB941662_S158	3436967	2082714	0.605974
GB941663_S159	3609477	2181024	0.604249
GB941664_S160	3202076	1612580	0.503605
GB941665_S161	2236464	1378389	0.616325
GB941666_S162	2555182	1257239	0.492035
GB941667_S163	2896187	1758118	0.607046
GB941668_S164	1581996	843130	0.532953
GB941669_S165	3159113	1887618	0.597515
GB941670_S166	2941828	1793096	0.609518
GB941671_S167	3734038	1777261	0.475962
GB941672_S168	2417667	1485523	0.614445
GB941673_S169	3114961	1844276	0.59207
GB941674_S170	3068946	1845664	0.6014
GB941675_S171	3040307	1891926	0.622281
GB941676_S172	4734910	2435365	0.514342
GB941677_S173	2275974	1331837	0.585172
GB941678_S174	3301010	1339270	0.405715
GB941679_S175	2269828	1315667	0.579633
GB941680_S176	3217518	1908324	0.593104
GB941681_S177	2846178	1676766	0.589129
GB941682_S178	2536114	1540836	0.607558
GB941683_S179	3327576	1290105	0.387701
GB941684_S180	1414499	754393	0.533329
GB941685_S181	3911713	2312994	0.5913
GB941686_S182	3109318	1865528	0.59998
GB941687_S183	2897986	1750037	0.60388
GB941688_S184	3406904	2055852	0.603437
GB941689_S185	2078545	1222526	0.588164
GB941690_S186	3683562	2279940	0.61895
GB941691_S187	2023953	1209314	0.597501
GB941692_S188	2431006	1446670	0.595091
GB941693_S189	4227549	2630845	0.62231
GB941694_S190	3372133	2022025	0.599628
GB941695_S191	3683900	2264331	0.614656
GB941696_S192	4066317	2131654	0.524222
GB941701_S193	4563434	2896538	0.634728
GB941702_S194	6842176	3577650	0.522882
GB941703_S195	6429153	4092849	0.636608
GB941704_S196	4912324	3000796	0.610871
GB941705_S197	5070809	3122955	0.615869
GB941706_S198	5331769	2802916	0.525701
GB941707_S199	6874257	4402726	0.640466
GB941708_S200	4469278	2755264	0.61649
GB941709_S201	6248335	3722779	0.595803
GB941710_S202	3109052	1832518	0.589414
GB941711_S203	6891827	3860282	0.560125
GB941712_S204	4430675	2316522	0.522837
GB941713_S205	4820603	2495785	0.517733
GB941714_S206	4433466	2542605	0.573503
GB941715_S207	6307226	3968366	0.629178
GB941716_S208	7498632	4506769	0.601012
GB941717_S209	6048942	3782845	0.625373
GB941718_S210	5356709	3275511	0.611478
GB941719_S211	5581537	3495617	0.626282
GB941720_S212	6843765	3993676	0.58355
GB941721_S213	3849995	2405431	0.624788
GB941722_S214	4670200	2875231	0.615655
GB941723_S215	5460555	3300072	0.604347
GB941724_S216	4955257	2159661	0.435832
GB941725_S217	6460314	3998168	0.618881
GB941726_S218	5384934	3365019	0.624895
GB941727_S219	5964724	3673209	0.615822
GB941728_S220	6768033	4294665	0.634551
GB941729_S221	5480967	3344707	0.61024
GB941730_S222	9757499	5517681	0.565481
GB941731_S223	4382931	2746227	0.626573
GB941732_S224	7094448	4171950	0.588058
GB941733_S225	4647803	2565747	0.552034
GB941734_S226	6086640	3467766	0.569734
GB941735_S227	4224455	2708781	0.641214
GB941736_S228	7966986	4863642	0.610475
GB941737_S229	2429	1407	0.579251
GB941738_S230	1546	292	0.188875
GB941739_S231	5040	2610	0.517857
GB941740_S232	724	384	0.530387
GB941741_S233	2902815	1673177	0.576398
GB941742_S234	285	157	0.550877
GB941743_S235	149	49	0.328859
GB941744_S236	6794709	4141604	0.609534
GB941745_S237	8437	5036	0.596895
GB941746_S238	1632	613	0.375613
GB941747_S239	569	268	0.471002
GB941748_S240	79	28	0.35443
GB941749_S241	7136209	2929070	0.410452
GB941750_S242	4228079	2512987	0.594357
GB941751_S243	3785633	2011680	0.531399
GB941752_S244	4648455	2678936	0.576307
GB941753_S245	4971085	3052863	0.614124
GB941754_S246	3742800	2284417	0.61035
GB941755_S247	4085611	2443669	0.598116
GB941756_S248	9399824	5873771	0.624881
GB941757_S249	6248015	3852979	0.616672
GB941758_S250	4675358	2989667	0.639452
GB941759_S251	5084025	2893099	0.569057
GB941760_S252	6492127	3956526	0.609434
GB941761_S253	7871764	4970999	0.631497
GB941762_S254	5591080	3529087	0.6312
GB941763_S255	5781448	3637123	0.629102
GB941764_S256	7071711	4523385	0.639645
GB941765_S257	4320370	2692734	0.623265
GB941766_S258	8078649	5270860	0.652443
GB941767_S259	4123143	2541505	0.6164
GB941768_S260	5246193	3245386	0.618617
GB941769_S261	4851821	2905572	0.598862
GB941770_S262	4146811	2501360	0.603201
GB941771_S263	5060818	3181256	0.628605
GB941772_S264	11964184	8029382	0.671118
GB941773_S265	6132930	3722647	0.606993
GB941774_S266	5291585	3417486	0.645834
GB941775_S267	5419545	3202090	0.590841
GB941776_S268	4828638	3046358	0.630894
GB941777_S269	2923800	1673297	0.572302
GB941778_S270	5108537	3095418	0.60593
GB941779_S271	4559606	2787941	0.611443
GB941780_S272	8096164	4385167	0.541635
GB941781_S273	3671039	2228191	0.606965
GB941782_S274	6571594	4021626	0.611971
GB941783_S275	4449209	2682139	0.602835
GB941784_S276	3408405	1649804	0.48404
GB941785_S277	5996541	3674233	0.612725
GB941786_S278	5420813	3422315	0.631329
GB941787_S279	5599121	3506572	0.626272
GB941788_S280	5959040	3837088	0.64391
GB941789_S281	3844447	2396484	0.623362
GB941790_S282	6040554	3681974	0.609542
GB941791_S283	4048761	2469273	0.609884
GB941792_S284	4098700	2412620	0.588631
GB941793_S285	7941676	5037806	0.63435
GB941794_S286	4185573	2607101	0.622878
GB941795_S287	6634764	4237582	0.638694
GB941796_S288	3470639	2133625	0.614764
GB941801_S289	2424564	1520989	0.627325
GB941802_S290	2475565	1507851	0.609094
GB941803_S291	2638505	1648933	0.62495
GB941804_S292	1561392	886466	0.567741
GB941805_S293	2177923	1336056	0.613454
GB941806_S294	2371197	1454436	0.613376
GB941807_S295	2705339	1759600	0.650418
GB941808_S296	2793157	1767228	0.632699
GB941809_S297	2788873	1757922	0.630334
GB941810_S298	1529184	891513	0.582999
GB941811_S299	3478070	2023281	0.581725
GB941812_S300	3290666	2111344	0.641616
GB941813_S301	1923615	1053536	0.547685
GB941814_S302	2758409	1567328	0.5682
GB941815_S303	3127033	1611689	0.515405
GB941816_S304	1855767	1115181	0.600927
GB941817_S305	1772182	1062825	0.599727
GB941818_S306	2808284	1752975	0.624216
GB941819_S307	2601235	1629568	0.626459
GB941820_S308	1737907	945201	0.543873
GB941821_S309	1958094	1174081	0.599604
GB941822_S310	1623331	965070	0.5945
GB941823_S311	3174561	1957113	0.616499
GB941824_S312	2256821	1350371	0.598351
GB941825_S313	2631296	1650346	0.627199
GB941826_S314	1830365	1114990	0.609163
GB941827_S315	2526461	1544342	0.611267
GB941828_S316	1778096	1027812	0.578041
GB941829_S317	2748139	1632344	0.593982
GB941830_S318	2542891	1475857	0.580385
GB941831_S319	2275704	1449352	0.636881
GB941832_S320	2716163	1617490	0.595505
GB941833_S321	1739430	986365	0.567062
GB941834_S322	2553115	1485859	0.581979
GB941835_S323	1069630	620249	0.579872
GB941836_S324	2650679	1586620	0.598571
GB941837_S325	1017	575	0.565388
GB941838_S326	1546	261	0.168823
GB941839_S327	1681	812	0.483046
GB941840_S328	299	166	0.555184
GB941841_S329	1123666	679123	0.604382
GB941842_S330	296	197	0.665541
GB941843_S331	88	18	0.204545
GB941844_S332	2218678	1364817	0.615149
GB941845_S333	4020	2354	0.585572
GB941846_S334	295	164	0.555932
GB941847_S335	277	136	0.490975
GB941848_S336	65	17	0.261538
GB941849_S337	1315910	761676	0.578821
GB941850_S338	3195153	2056852	0.643741
GB941851_S339	1465368	880351	0.600771
GB941852_S340	2609194	1636610	0.627247
GB941853_S341	1500289	830765	0.553737
GB941854_S342	940538	563519	0.599145
GB941855_S343	2241191	1363021	0.608168
GB941856_S344	2925541	1777259	0.607498
GB941857_S345	1961536	1204949	0.614288
GB941858_S346	2174190	1332783	0.613002
GB941859_S347	1499235	881443	0.587929
GB941860_S348	2163120	791924	0.366103
GB941861_S349	2575065	1625528	0.631257
GB941862_S350	2018190	1290907	0.639636
GB941863_S351	1842771	1088535	0.590706
GB941864_S352	4126209	2685479	0.650834
GB941865_S353	1403908	859016	0.611875
GB941866_S354	3206223	1989246	0.620433
GB941867_S355	2386931	1530004	0.640992
GB941868_S356	2161782	1327749	0.614192
GB941869_S357	1587960	936816	0.589949
GB941870_S358	1650926	987025	0.597861
GB941871_S359	2481101	1531277	0.617176
GB941872_S360	1548803	965067	0.623105
GB941873_S361	2982712	1841906	0.617527
GB941874_S362	2202866	1385570	0.628985
GB941875_S363	2806910	1829555	0.651804
GB941876_S364	3028218	1944765	0.642214
GB941877_S365	1773744	1057805	0.596368
GB941878_S366	2602040	1596247	0.61346
GB941879_S367	7471184	4837790	0.647527
GB941880_S368	1966563	1221450	0.621109
GB941881_S369	2173715	1309752	0.602541
GB941882_S370	2911627	1839381	0.631736
GB941883_S371	1446716	827866	0.572238
GB941884_S372	2653706	1705205	0.642575
GB941885_S373	2649621	1448800	0.546795
GB941886_S374	2621215	1646558	0.628166
GB941887_S375	1723661	1071791	0.621811
GB941888_S376	2020416	1299258	0.643065
GB941889_S377	2046374	1291003	0.630873
GB941890_S378	1678487	1057897	0.630268
GB941891_S379	1598879	996963	0.623539
GB941892_S380	2138430	871089	0.40735
GB941893_S381	2451868	1446605	0.590001
GB941894_S382	3571322	2337676	0.654569
GB941895_S383	1732475	1076203	0.621194
GB941896_S384	2293788	1460493	0.636717
GB941901_S385	1616166	1036680	0.641444
GB941902_S386	1938551	1245911	0.642702
GB941903_S387	2674319	1740970	0.650996
GB941904_S388	2531313	1549979	0.612322
GB941905_S389	3268189	2071686	0.633894
GB941906_S390	2393921	1514486	0.632638
GB941907_S391	2241277	1414919	0.6313
GB941908_S392	1937892	1266108	0.653343
GB941909_S393	1561573	918428	0.588143
GB941910_S394	1868999	1189619	0.636501
GB941911_S395	2478700	1459195	0.588694
GB941912_S396	1163923	679225	0.583565
GB941913_S397	1487213	827411	0.55635
GB941914_S398	1819744	1084281	0.595843
GB941915_S399	2399282	1492405	0.622022
GB941916_S400	1744412	1070481	0.613663
GB941917_S401	1254942	766110	0.610474
GB941918_S402	2704278	1519270	0.561802
GB941919_S403	1984915	1305793	0.657858
GB941920_S404	2399194	1508552	0.628774
GB941921_S405	1150545	736647	0.640259
GB941922_S406	1765458	1129662	0.639869
GB941923_S407	2151267	1368340	0.636062
GB941924_S408	1567215	985934	0.629099
GB941925_S409	1756707	1078334	0.613838
GB941926_S410	1814168	1179115	0.649948
GB941927_S411	1602902	1020865	0.636885
GB941928_S412	2226056	1432779	0.64364
GB941929_S413	2155837	1325557	0.614869
GB941930_S414	1905156	1195711	0.627618
GB941931_S415	1701958	1127378	0.662401
GB941932_S416	3343093	1963059	0.587198
GB941933_S417	1519894	862402	0.567409
GB941934_S418	2280791	1419795	0.622501
GB941935_S419	1043583	564116	0.540557
GB941936_S420	2425971	1509087	0.622055
GB941937_S421	541	290	0.536044
GB941938_S422	584	96	0.164384
GB941939_S423	3093	1593	0.515034
GB941940_S424	355	226	0.63662
GB941941_S425	983666	519136	0.527756
GB941942_S426	79	33	0.417722
GB941943_S427	65	22	0.338462
GB941944_S428	2097209	1304685	0.622105
GB941945_S429	2191	1258	0.574167
GB941946_S430	289	167	0.577855
GB941947_S431	227	117	0.515419
GB941948_S432	33	6	0.181818
GB941949_S433	1276166	782906	0.613483
GB941950_S434	1846698	1072054	0.580525
GB941951_S435	1261202	734734	0.582566
GB941952_S436	1384423	865314	0.625036
GB941953_S437	2522315	1581044	0.626823
GB941954_S438	691536	410102	0.593031
GB941955_S439	1821761	990150	0.543513
GB941956_S440	1660262	1026158	0.61807
GB941957_S441	1125369	624309	0.554759
GB941958_S442	1955782	1314287	0.672001
GB941959_S443	1266595	760701	0.600587
GB941960_S444	1280041	824035	0.643757
GB941961_S445	1613993	984325	0.609869
GB941962_S446	2084873	1344492	0.64488
GB941963_S447	3123950	1873627	0.599762
GB941964_S448	2461185	1649479	0.670197
GB941965_S449	1456122	937555	0.643871
GB941966_S450	2252994	1401501	0.622062
GB941967_S451	1821380	1142272	0.627146
GB941968_S452	1567362	961560	0.613489
GB941969_S453	1863504	1131229	0.607044
GB941970_S454	1037036	620501	0.598341
GB941971_S455	1378824	812785	0.589477
GB941972_S456	1104342	680932	0.616595
GB941973_S457	1699774	1028173	0.604888
GB941974_S458	1618608	1013754	0.626312
GB941975_S459	1925979	1188702	0.617194
GB941976_S460	1123279	691576	0.615676
GB941977_S461	1834337	1190094	0.648787
GB941978_S462	2373034	1381147	0.582017
GB941979_S463	1737513	1141215	0.656809
GB941980_S464	1341402	839828	0.626082
GB941981_S465	1642767	1010367	0.61504
GB941982_S466	1741058	1078475	0.619437
GB941983_S467	1840406	1159582	0.630069
GB941984_S468	1310724	634723	0.484254
GB941985_S469	2094568	1259981	0.601547
GB941986_S470	1401076	898189	0.641071
GB941987_S471	1644970	994687	0.604684
GB941988_S472	2672248	1787344	0.668854
GB941989_S473	1770690	1155833	0.652759
GB941990_S474	1768255	1155445	0.653438
GB941991_S475	1381653	886818	0.641853
GB941992_S476	1627890	1026525	0.630586
GB941993_S477	1933208	1218431	0.630264
GB941994_S478	947450	572694	0.604458
GB941995_S479	1140304	684601	0.600367
GB941996_S480	1612298	1026187	0.636475
Average	2.63518e+06	1.59327e+06	0.590988

## Sheet: scH3K27me3 single cells
	mapped reads	uniq reads	redundancy
./GB941501_4lanes/AACTGCCA_readname.txt.R1.bed.hg18.uniq	19336	13570	0.2982
./GB941501_4lanes/AAGAGGTT_readname.txt.R1.bed.hg18.uniq	30255	22063	0.270765
./GB941501_4lanes/AGAATCAG_readname.txt.R1.bed.hg18.uniq	10547	7783	0.262065
./GB941501_4lanes/ATATGCTG_readname.txt.R1.bed.hg18.uniq	16841	12231	0.273737
./GB941501_4lanes/ATCTGATG_readname.txt.R1.bed.hg18.uniq	187993	134423	0.284957
./GB941501_4lanes/CAAGGTCA_readname.txt.R1.bed.hg18.uniq	63170	45032	0.28713
./GB941501_4lanes/CAATGTGT_readname.txt.R1.bed.hg18.uniq	16749	12469	0.255538
./GB941501_4lanes/CACTCTTG_readname.txt.R1.bed.hg18.uniq	12538	9203	0.265991
./GB941501_4lanes/CATGTAGA_readname.txt.R1.bed.hg18.uniq	6789	5019	0.260716
./GB941501_4lanes/CCTAGTAG_readname.txt.R1.bed.hg18.uniq	18654	13924	0.253565
./GB941501_4lanes/CGATTACA_readname.txt.R1.bed.hg18.uniq	7673	5803	0.243712
./GB941501_4lanes/CTAGTGTG_readname.txt.R1.bed.hg18.uniq	6958	5222	0.249497
./GB941501_4lanes/CTCTGATT_readname.txt.R1.bed.hg18.uniq	18534	13479	0.272742
./GB941501_4lanes/CTGACGTT_readname.txt.R1.bed.hg18.uniq	59188	42424	0.283233
./GB941501_4lanes/GAGCGATA_readname.txt.R1.bed.hg18.uniq	34811	25302	0.273161
./GB941501_4lanes/GCTTAGTA_readname.txt.R1.bed.hg18.uniq	84224	60422	0.282604
./GB941501_4lanes/GTCTCCTA_readname.txt.R1.bed.hg18.uniq	287023	205701	0.283329
./GB941501_4lanes/TACAGTGT_readname.txt.R1.bed.hg18.uniq	11505	8635	0.249457
./GB941501_4lanes/TAGCAGTT_readname.txt.R1.bed.hg18.uniq	230177	164160	0.28681
./GB941501_4lanes/TCATCGTG_readname.txt.R1.bed.hg18.uniq	5846	4346	0.256586
./GB941501_4lanes/TCCGGTAT_readname.txt.R1.bed.hg18.uniq	41489	29986	0.277254
./GB941501_4lanes/TCTGTTGT_readname.txt.R1.bed.hg18.uniq	104161	75719	0.273058
./GB941501_4lanes/TGATGCGA_readname.txt.R1.bed.hg18.uniq	27939	20156	0.278571
./GB941501_4lanes/TGCAGACA_readname.txt.R1.bed.hg18.uniq	6057	4487	0.259204
./GB941502_4lanes/AAGAATCT_readname.txt.R1.bed.hg18.uniq	6808	5090	0.25235
./GB941502_4lanes/AATCGGAT_readname.txt.R1.bed.hg18.uniq	12266	8941	0.271075
./GB941502_4lanes/ACGTACGT_readname.txt.R1.bed.hg18.uniq	13243	9420	0.288681
./GB941502_4lanes/ACGTACTC_readname.txt.R1.bed.hg18.uniq	17314	12412	0.283123
./GB941502_4lanes/AGAATCAG_readname.txt.R1.bed.hg18.uniq	20094	14388	0.283965
./GB941502_4lanes/AGAGTTGT_readname.txt.R1.bed.hg18.uniq	21626	15921	0.263803
./GB941502_4lanes/ATGGACTG_readname.txt.R1.bed.hg18.uniq	41826	29475	0.295295
./GB941502_4lanes/ATGGCTGT_readname.txt.R1.bed.hg18.uniq	47463	33858	0.286644
./GB941502_4lanes/CTAAGTGT_readname.txt.R1.bed.hg18.uniq	13680	9997	0.269225
./GB941502_4lanes/CTAGTGTG_readname.txt.R1.bed.hg18.uniq	35105	25552	0.272126
./GB941502_4lanes/CTCTGATT_readname.txt.R1.bed.hg18.uniq	35012	25473	0.272449
./GB941502_4lanes/CTGCAATC_readname.txt.R1.bed.hg18.uniq	7395	5439	0.264503
./GB941502_4lanes/GACTAAGA_readname.txt.R1.bed.hg18.uniq	16624	11720	0.294995
./GB941502_4lanes/GAGCGATA_readname.txt.R1.bed.hg18.uniq	22834	16108	0.294561
./GB941502_4lanes/GATGGCTT_readname.txt.R1.bed.hg18.uniq	66744	46643	0.301166
./GB941502_4lanes/GCTTAGTA_readname.txt.R1.bed.hg18.uniq	3455	2550	0.261939
./GB941502_4lanes/GGATCATC_readname.txt.R1.bed.hg18.uniq	60063	41850	0.303232
./GB941502_4lanes/TAACCAAG_readname.txt.R1.bed.hg18.uniq	2423	1866	0.22988
./GB941502_4lanes/TAAGGTGT_readname.txt.R1.bed.hg18.uniq	6293	4712	0.251232
./GB941502_4lanes/TACACTGT_readname.txt.R1.bed.hg18.uniq	17413	12481	0.283237
./GB941502_4lanes/TAGCAGTT_readname.txt.R1.bed.hg18.uniq	50888	36538	0.281992
./GB941502_4lanes/TCGATTAA_readname.txt.R1.bed.hg18.uniq	19312	13900	0.28024
./GB941502_4lanes/TGATGCGA_readname.txt.R1.bed.hg18.uniq	8605	6318	0.265776
./GB941502_4lanes/TGGACATG_readname.txt.R1.bed.hg18.uniq	10535	7619	0.276792
./GB941502_4lanes/TTCACGAT_readname.txt.R1.bed.hg18.uniq	439422	309819	0.29494
./GB941503_4lanes/AAGAATCT_readname.txt.R1.bed.hg18.uniq	21459	15796	0.263899
./GB941503_4lanes/ACACACGT_readname.txt.R1.bed.hg18.uniq	324950	224128	0.310269
./GB941503_4lanes/AGAGTTGT_readname.txt.R1.bed.hg18.uniq	103188	73723	0.285547
./GB941503_4lanes/AGTTGACC_readname.txt.R1.bed.hg18.uniq	16667	11866	0.288054
./GB941503_4lanes/ATTGGCGT_readname.txt.R1.bed.hg18.uniq	15080	10941	0.274469
./GB941503_4lanes/CAATTCGT_readname.txt.R1.bed.hg18.uniq	1929	1556	0.193364
./GB941503_4lanes/CATATGCT_readname.txt.R1.bed.hg18.uniq	12202	9109	0.253483
./GB941503_4lanes/CGAACTAC_readname.txt.R1.bed.hg18.uniq	85414	60618	0.290304
./GB941503_4lanes/CGAGAATG_readname.txt.R1.bed.hg18.uniq	11894	8599	0.27703
./GB941503_4lanes/CTAAGTGT_readname.txt.R1.bed.hg18.uniq	16136	11607	0.280677
./GB941503_4lanes/CTTCGTTG_readname.txt.R1.bed.hg18.uniq	1109	1056	0.0477908
./GB941503_4lanes/GACGTTAA_readname.txt.R1.bed.hg18.uniq	276888	192674	0.304145
./GB941503_4lanes/GACTAAGA_readname.txt.R1.bed.hg18.uniq	7253	5273	0.27299
./GB941503_4lanes/GAGCGATA_readname.txt.R1.bed.hg18.uniq	1150	1088	0.053913
./GB941503_4lanes/GCGTAATT_readname.txt.R1.bed.hg18.uniq	13672	9808	0.282621
./GB941503_4lanes/GTCTCCTA_readname.txt.R1.bed.hg18.uniq	22484	16087	0.284513
./GB941503_4lanes/GTGAACGT_readname.txt.R1.bed.hg18.uniq	3660	2688	0.265574
./GB941503_4lanes/TAAGGTGT_readname.txt.R1.bed.hg18.uniq	1753	1490	0.150029
./GB941503_4lanes/TCCGGTAT_readname.txt.R1.bed.hg18.uniq	10877	8043	0.26055
./GB941503_4lanes/TGAGCGAA_readname.txt.R1.bed.hg18.uniq	85601	59100	0.309588
./GB941503_4lanes/TGGCGTAT_readname.txt.R1.bed.hg18.uniq	88101	62603	0.289418
./GB941503_4lanes/TTCACGAT_readname.txt.R1.bed.hg18.uniq	72781	51625	0.29068
./GB941503_4lanes/TTCACTAG_readname.txt.R1.bed.hg18.uniq	6237	4657	0.253327
./GB941504_4lanes/AATCGGAT_readname.txt.R1.bed.hg18.uniq	32362	23037	0.288147
./GB941504_4lanes/AGAGTTGT_readname.txt.R1.bed.hg18.uniq	1438	1295	0.0994437
./GB941504_4lanes/AGCAATCC_readname.txt.R1.bed.hg18.uniq	5996	4473	0.254003
./GB941504_4lanes/ATACGACT_readname.txt.R1.bed.hg18.uniq	1142	1079	0.0551664
./GB941504_4lanes/ATCTGATG_readname.txt.R1.bed.hg18.uniq	1264	1102	0.128165
./GB941504_4lanes/CAAGGTCA_readname.txt.R1.bed.hg18.uniq	4727	3538	0.251534
./GB941504_4lanes/CACTCTTG_readname.txt.R1.bed.hg18.uniq	4857	3662	0.246037
./GB941504_4lanes/CATATGCT_readname.txt.R1.bed.hg18.uniq	12746	9445	0.258983
./GB941504_4lanes/CATGGTGT_readname.txt.R1.bed.hg18.uniq	77110	54986	0.286915
./GB941504_4lanes/CATGTAGA_readname.txt.R1.bed.hg18.uniq	153067	108280	0.292597
./GB941504_4lanes/CATGTATT_readname.txt.R1.bed.hg18.uniq	90505	64562	0.286647
./GB941504_4lanes/CGAGAATG_readname.txt.R1.bed.hg18.uniq	9406	6900	0.266426
./GB941504_4lanes/GAGACCTT_readname.txt.R1.bed.hg18.uniq	29801	21153	0.290192
./GB941504_4lanes/GATAACCA_readname.txt.R1.bed.hg18.uniq	212526	151272	0.288219
./GB941504_4lanes/GATATTGT_readname.txt.R1.bed.hg18.uniq	41518	30012	0.277133
./GB941504_4lanes/GGTCAATG_readname.txt.R1.bed.hg18.uniq	10986	8058	0.266521
./GB941504_4lanes/GTCTCCTA_readname.txt.R1.bed.hg18.uniq	79472	57202	0.280224
./GB941504_4lanes/GTGAACGT_readname.txt.R1.bed.hg18.uniq	29780	21139	0.290161
./GB941504_4lanes/GTTATATC_readname.txt.R1.bed.hg18.uniq	198698	143390	0.278352
./GB941504_4lanes/TAAGGTGT_readname.txt.R1.bed.hg18.uniq	6810	5027	0.261821
./GB941504_4lanes/TCAGCTTG_readname.txt.R1.bed.hg18.uniq	38440	27689	0.279683
./GB941504_4lanes/TCCGGTAT_readname.txt.R1.bed.hg18.uniq	69575	49911	0.28263
./GB941504_4lanes/TCGTTAGC_readname.txt.R1.bed.hg18.uniq	55270	39948	0.277221
./GB941504_4lanes/TGAGCGAA_readname.txt.R1.bed.hg18.uniq	15190	10838	0.286504
./GB941504_4lanes/TTCACGAT_readname.txt.R1.bed.hg18.uniq	24427	17171	0.297048
./GB941505_4lanes/AAGAATCT_readname.txt.R1.bed.hg18.uniq	25629	18942	0.260915
./GB941505_4lanes/ACGTACGT_readname.txt.R1.bed.hg18.uniq	22283	15772	0.292196
./GB941505_4lanes/ACTGCATG_readname.txt.R1.bed.hg18.uniq	11791	8608	0.269952
./GB941505_4lanes/AGCAATCC_readname.txt.R1.bed.hg18.uniq	15235	11009	0.277388
./GB941505_4lanes/AGTTGACC_readname.txt.R1.bed.hg18.uniq	13105	9612	0.266539
./GB941505_4lanes/ATACGACT_readname.txt.R1.bed.hg18.uniq	7051	5326	0.244646
./GB941505_4lanes/ATATGCTG_readname.txt.R1.bed.hg18.uniq	9788	7026	0.282182
./GB941505_4lanes/ATGACACC_readname.txt.R1.bed.hg18.uniq	6901	5202	0.246196
./GB941505_4lanes/ATGACTGT_readname.txt.R1.bed.hg18.uniq	63346	45637	0.27956
./GB941505_4lanes/ATTGGCGT_readname.txt.R1.bed.hg18.uniq	3415	2657	0.221962
./GB941505_4lanes/CACTCTTG_readname.txt.R1.bed.hg18.uniq	97839	70366	0.280798
./GB941505_4lanes/CAGCTCTT_readname.txt.R1.bed.hg18.uniq	9712	7228	0.255766
./GB941505_4lanes/CATAACTT_readname.txt.R1.bed.hg18.uniq	7446	5565	0.252619
./GB941505_4lanes/CGATTACA_readname.txt.R1.bed.hg18.uniq	5402	3993	0.260829
./GB941505_4lanes/GACTAAGA_readname.txt.R1.bed.hg18.uniq	8841	6452	0.270218
./GB941505_4lanes/GATGGCTT_readname.txt.R1.bed.hg18.uniq	198566	141308	0.288358
./GB941505_4lanes/GCGTAATT_readname.txt.R1.bed.hg18.uniq	113253	80792	0.286624
./GB941505_4lanes/TACACTGT_readname.txt.R1.bed.hg18.uniq	14389	10343	0.281187
./GB941505_4lanes/TAGACGGA_readname.txt.R1.bed.hg18.uniq	7201	5440	0.244549
./GB941505_4lanes/TAGTTCTG_readname.txt.R1.bed.hg18.uniq	11916	8759	0.264938
./GB941505_4lanes/TCGTTAGC_readname.txt.R1.bed.hg18.uniq	4829	3512	0.272727
./GB941505_4lanes/TTAAGCAT_readname.txt.R1.bed.hg18.uniq	49947	36536	0.268505
./GB941506_4lanes/ACGTACGT_readname.txt.R1.bed.hg18.uniq	152405	105789	0.305869
./GB941506_4lanes/ACGTACTC_readname.txt.R1.bed.hg18.uniq	21320	15703	0.263462
./GB941506_4lanes/AGAATCAG_readname.txt.R1.bed.hg18.uniq	115480	84742	0.266176
./GB941506_4lanes/AGAGTTGT_readname.txt.R1.bed.hg18.uniq	8988	6921	0.229973
./GB941506_4lanes/AGTTGACC_readname.txt.R1.bed.hg18.uniq	11771	8684	0.262255
./GB941506_4lanes/ATACGACT_readname.txt.R1.bed.hg18.uniq	124933	89610	0.282736
./GB941506_4lanes/ATAGATAC_readname.txt.R1.bed.hg18.uniq	50844	37625	0.259991
./GB941506_4lanes/ATATGCTG_readname.txt.R1.bed.hg18.uniq	45467	33534	0.262454
./GB941506_4lanes/ATCTGATG_readname.txt.R1.bed.hg18.uniq	1299	1214	0.0654349
./GB941506_4lanes/ATGACACC_readname.txt.R1.bed.hg18.uniq	54020	39425	0.270178
./GB941506_4lanes/CAAGATAT_readname.txt.R1.bed.hg18.uniq	45145	32594	0.278015
./GB941506_4lanes/CATGTATT_readname.txt.R1.bed.hg18.uniq	13927	10462	0.248797
./GB941506_4lanes/CCTAGTAG_readname.txt.R1.bed.hg18.uniq	85534	62661	0.267414
./GB941506_4lanes/CTAAGTGT_readname.txt.R1.bed.hg18.uniq	97463	71897	0.262315
./GB941506_4lanes/CTTCGTTG_readname.txt.R1.bed.hg18.uniq	1253	1166	0.0694334
./GB941506_4lanes/GTACCGAT_readname.txt.R1.bed.hg18.uniq	43057	30599	0.289337
./GB941506_4lanes/GTGAACGT_readname.txt.R1.bed.hg18.uniq	8241	6088	0.261255
./GB941506_4lanes/GTTATATC_readname.txt.R1.bed.hg18.uniq	90770	66971	0.26219
./GB941506_4lanes/TAACGTGT_readname.txt.R1.bed.hg18.uniq	141103	100194	0.289923
./GB941506_4lanes/TAGTTCTG_readname.txt.R1.bed.hg18.uniq	51817	38243	0.26196
./GB941506_4lanes/TCAGCTTG_readname.txt.R1.bed.hg18.uniq	140584	103014	0.267242
./GB941506_4lanes/TCCTGCTG_readname.txt.R1.bed.hg18.uniq	14341	10501	0.267764
./GB941506_4lanes/TCGTCGAT_readname.txt.R1.bed.hg18.uniq	15363	11325	0.262839
./GB941506_4lanes/TGAGCGAA_readname.txt.R1.bed.hg18.uniq	14138	10439	0.261635
./GB941506_4lanes/TGGCGTAT_readname.txt.R1.bed.hg18.uniq	77957	56658	0.273215
./GB941507_4lanes/AACTGCCA_readname.txt.R1.bed.hg18.uniq	25350	18092	0.286312
./GB941507_4lanes/AAGAGGTT_readname.txt.R1.bed.hg18.uniq	118430	84480	0.286667
./GB941507_4lanes/AATCGGAT_readname.txt.R1.bed.hg18.uniq	10124	7506	0.258593
./GB941507_4lanes/ACGTACGT_readname.txt.R1.bed.hg18.uniq	6633	4833	0.27137
./GB941507_4lanes/ACTGCATG_readname.txt.R1.bed.hg18.uniq	8604	6506	0.24384
./GB941507_4lanes/AGAGTTGT_readname.txt.R1.bed.hg18.uniq	1985	1874	0.0559194
./GB941507_4lanes/AGCAATCC_readname.txt.R1.bed.hg18.uniq	6387	4616	0.277282
./GB941507_4lanes/ATAGATAC_readname.txt.R1.bed.hg18.uniq	2453	1955	0.203017
./GB941507_4lanes/ATGACACC_readname.txt.R1.bed.hg18.uniq	8426	6311	0.251009
./GB941507_4lanes/ATGACTGT_readname.txt.R1.bed.hg18.uniq	8272	6049	0.268738
./GB941507_4lanes/CAAGGTCA_readname.txt.R1.bed.hg18.uniq	11386	8437	0.259002
./GB941507_4lanes/CAATGTGT_readname.txt.R1.bed.hg18.uniq	4409	3434	0.221139
./GB941507_4lanes/CATGTAGA_readname.txt.R1.bed.hg18.uniq	5303	3979	0.24967
./GB941507_4lanes/CATGTATT_readname.txt.R1.bed.hg18.uniq	3179	2664	0.162001
./GB941507_4lanes/CCTAGTAG_readname.txt.R1.bed.hg18.uniq	10245	7594	0.25876
./GB941507_4lanes/CGATTACA_readname.txt.R1.bed.hg18.uniq	50361	35751	0.290105
./GB941507_4lanes/GAGACCTT_readname.txt.R1.bed.hg18.uniq	168230	120370	0.284491
./GB941507_4lanes/GGATCATC_readname.txt.R1.bed.hg18.uniq	10074	7394	0.266031
./GB941507_4lanes/TAACGTGT_readname.txt.R1.bed.hg18.uniq	10416	7700	0.260753
./GB941507_4lanes/TACAGTGT_readname.txt.R1.bed.hg18.uniq	135549	95213	0.297575
./GB941507_4lanes/TAGCAGTT_readname.txt.R1.bed.hg18.uniq	10929	8043	0.264068
./GB941507_4lanes/TCATCGTG_readname.txt.R1.bed.hg18.uniq	43328	39603	0.0859721
./GB941507_4lanes/TCCGGTAT_readname.txt.R1.bed.hg18.uniq	10858	8050	0.258611
./GB941507_4lanes/TCCTGCTG_readname.txt.R1.bed.hg18.uniq	50777	35325	0.304311
./GB941507_4lanes/TTAAGCAT_readname.txt.R1.bed.hg18.uniq	57682	41521	0.280174
./GB941508_4lanes/AAGAATCT_readname.txt.R1.bed.hg18.uniq	15155	11517	0.240053
./GB941508_4lanes/ACTGCATG_readname.txt.R1.bed.hg18.uniq	38893	29038	0.253387
./GB941508_4lanes/ATACGACT_readname.txt.R1.bed.hg18.uniq	42957	32331	0.247364
./GB941508_4lanes/ATAGATAC_readname.txt.R1.bed.hg18.uniq	10366	7956	0.232491
./GB941508_4lanes/ATATGCTG_readname.txt.R1.bed.hg18.uniq	4438	3404	0.232988
./GB941508_4lanes/CACAGTTG_readname.txt.R1.bed.hg18.uniq	14714	11148	0.242354
./GB941508_4lanes/CATATGCT_readname.txt.R1.bed.hg18.uniq	19652	15584	0.207002
./GB941508_4lanes/CATGTAGA_readname.txt.R1.bed.hg18.uniq	23753	17666	0.256262
./GB941508_4lanes/CATGTATT_readname.txt.R1.bed.hg18.uniq	4095	3116	0.239072
./GB941508_4lanes/CATGTGTG_readname.txt.R1.bed.hg18.uniq	61191	45111	0.262784
./GB941508_4lanes/CCTAGTAG_readname.txt.R1.bed.hg18.uniq	46201	34318	0.257202
./GB941508_4lanes/CTGACGTT_readname.txt.R1.bed.hg18.uniq	90374	65906	0.270742
./GB941508_4lanes/GATAACCA_readname.txt.R1.bed.hg18.uniq	140657	103860	0.261608
./GB941508_4lanes/TAAGGTGT_readname.txt.R1.bed.hg18.uniq	90409	67673	0.251479
./GB941508_4lanes/TAGACGGA_readname.txt.R1.bed.hg18.uniq	39872	29753	0.253787
./GB941508_4lanes/TAGCAGTT_readname.txt.R1.bed.hg18.uniq	29449	21818	0.259126
./GB941508_4lanes/TCATCGTG_readname.txt.R1.bed.hg18.uniq	1864	1497	0.196888
./GB941508_4lanes/TGAGCGAA_readname.txt.R1.bed.hg18.uniq	7935	6037	0.239193
./GB941508_4lanes/TTCACTAG_readname.txt.R1.bed.hg18.uniq	46144	34420	0.254074
./GB941509_4lanes/AACTGCCA_readname.txt.R1.bed.hg18.uniq	3606	2705	0.249861
./GB941509_4lanes/AGCAATCC_readname.txt.R1.bed.hg18.uniq	23203	16507	0.288583
./GB941509_4lanes/AGGCTTGA_readname.txt.R1.bed.hg18.uniq	22123	15959	0.278624
./GB941509_4lanes/ATATGCTG_readname.txt.R1.bed.hg18.uniq	9895	7264	0.265892
./GB941509_4lanes/ATTAAGCG_readname.txt.R1.bed.hg18.uniq	3871	2898	0.251356
./GB941509_4lanes/CAAGTCAC_readname.txt.R1.bed.hg18.uniq	29063	21255	0.268658
./GB941509_4lanes/GACTAAGA_readname.txt.R1.bed.hg18.uniq	6408	4801	0.25078
./GB941509_4lanes/GAGACCTT_readname.txt.R1.bed.hg18.uniq	15834	11446	0.277125
./GB941509_4lanes/GATATTGT_readname.txt.R1.bed.hg18.uniq	17426	12765	0.267474
./GB941509_4lanes/GCTTAGTA_readname.txt.R1.bed.hg18.uniq	9900	7229	0.269798
./GB941509_4lanes/TAAGGTGT_readname.txt.R1.bed.hg18.uniq	57666	41138	0.286616
./GB941509_4lanes/TACAGTGT_readname.txt.R1.bed.hg18.uniq	5591	4199	0.248972
./GB941509_4lanes/TAGCAGTT_readname.txt.R1.bed.hg18.uniq	45839	33035	0.279325
./GB941509_4lanes/TCATCGTG_readname.txt.R1.bed.hg18.uniq	6957	5170	0.256864
./GB941509_4lanes/TCCGGTAT_readname.txt.R1.bed.hg18.uniq	4948	3710	0.250202
./GB941509_4lanes/TCGTCGAT_readname.txt.R1.bed.hg18.uniq	19368	13641	0.295694
./GB941509_4lanes/TCGTTAGC_readname.txt.R1.bed.hg18.uniq	32226	23093	0.283405
./GB941509_4lanes/TCTACTGT_readname.txt.R1.bed.hg18.uniq	4760	3705	0.221639
./GB941509_4lanes/TGATGCGA_readname.txt.R1.bed.hg18.uniq	108298	75797	0.300107
./GB941509_4lanes/TGGACATG_readname.txt.R1.bed.hg18.uniq	93475	64668	0.308179
./GB941509_4lanes/TGGCGTAT_readname.txt.R1.bed.hg18.uniq	1805	1430	0.207756
./GB941509_4lanes/TTAAGCAT_readname.txt.R1.bed.hg18.uniq	6365	4710	0.260016
./GB941509_4lanes/TTCACTAG_readname.txt.R1.bed.hg18.uniq	169702	122730	0.276791
./GB941510_4lanes/AACTGCCA_readname.txt.R1.bed.hg18.uniq	2253	1749	0.223702
./GB941510_4lanes/AAGAATCT_readname.txt.R1.bed.hg18.uniq	78755	59164	0.248759
./GB941510_4lanes/ACACACGT_readname.txt.R1.bed.hg18.uniq	4309	3149	0.269204
./GB941510_4lanes/AGGTTGCT_readname.txt.R1.bed.hg18.uniq	2538	2051	0.191883
./GB941510_4lanes/AGTTGACC_readname.txt.R1.bed.hg18.uniq	62852	45932	0.269204
./GB941510_4lanes/ATATGCTG_readname.txt.R1.bed.hg18.uniq	111186	80658	0.274567
./GB941510_4lanes/CACTCTTG_readname.txt.R1.bed.hg18.uniq	8898	6528	0.266352
./GB941510_4lanes/CATAACTT_readname.txt.R1.bed.hg18.uniq	7560	5689	0.247487
./GB941510_4lanes/CATGGTGT_readname.txt.R1.bed.hg18.uniq	98112	70309	0.28338
./GB941510_4lanes/CCTAGTAG_readname.txt.R1.bed.hg18.uniq	137449	100971	0.265393
./GB941510_4lanes/GATATTGT_readname.txt.R1.bed.hg18.uniq	40272	30011	0.254792
./GB941510_4lanes/GTTATATC_readname.txt.R1.bed.hg18.uniq	97336	72644	0.253678
./GB941510_4lanes/TAGTTCTG_readname.txt.R1.bed.hg18.uniq	14444	10771	0.254292
./GB941510_4lanes/TCAAGTTG_readname.txt.R1.bed.hg18.uniq	152251	113201	0.256484
./GB941510_4lanes/TCGTTAGC_readname.txt.R1.bed.hg18.uniq	63077	46369	0.264883
./GB941510_4lanes/TCTACTGT_readname.txt.R1.bed.hg18.uniq	20522	15040	0.267128
./GB941510_4lanes/TCTGTTGT_readname.txt.R1.bed.hg18.uniq	28656	21432	0.252094
./GB941510_4lanes/TTCACGAT_readname.txt.R1.bed.hg18.uniq	11184	8540	0.236409
./GB941510_4lanes/TTCACTAG_readname.txt.R1.bed.hg18.uniq	14063	10654	0.242409
./GB941511_4lanes/AAGAATCT_readname.txt.R1.bed.hg18.uniq	6658	5212	0.217182
./GB941511_4lanes/AAGAGGTT_readname.txt.R1.bed.hg18.uniq	13177	9736	0.261137
./GB941511_4lanes/AATGACAG_readname.txt.R1.bed.hg18.uniq	29257	20547	0.297707
./GB941511_4lanes/AGAGTTGT_readname.txt.R1.bed.hg18.uniq	65495	47519	0.274464
./GB941511_4lanes/AGCAATCC_readname.txt.R1.bed.hg18.uniq	88608	62808	0.29117
./GB941511_4lanes/AGGCTTGA_readname.txt.R1.bed.hg18.uniq	68046	48174	0.292038
./GB941511_4lanes/AGGTTGCT_readname.txt.R1.bed.hg18.uniq	56621	38890	0.313152
./GB941511_4lanes/ATACGACT_readname.txt.R1.bed.hg18.uniq	2124	2008	0.0546139
./GB941511_4lanes/ATCTGATG_readname.txt.R1.bed.hg18.uniq	32521	23631	0.273362
./GB941511_4lanes/ATGGCTGT_readname.txt.R1.bed.hg18.uniq	76572	53074	0.306875
./GB941511_4lanes/CACAGTTG_readname.txt.R1.bed.hg18.uniq	10764	8045	0.252601
./GB941511_4lanes/CATATGCT_readname.txt.R1.bed.hg18.uniq	6372	5900	0.0740741
./GB941511_4lanes/CTTCGTTG_readname.txt.R1.bed.hg18.uniq	2101	1985	0.0552118
./GB941511_4lanes/GACTGTGT_readname.txt.R1.bed.hg18.uniq	231585	170264	0.264788
./GB941511_4lanes/GATAACCA_readname.txt.R1.bed.hg18.uniq	129384	92485	0.28519
./GB941511_4lanes/GATGGCTT_readname.txt.R1.bed.hg18.uniq	179381	126742	0.293448
./GB941511_4lanes/TAACGTGT_readname.txt.R1.bed.hg18.uniq	31435	22514	0.283792
./GB941511_4lanes/TACACTGT_readname.txt.R1.bed.hg18.uniq	26651	19719	0.260103
./GB941511_4lanes/TAGACGGA_readname.txt.R1.bed.hg18.uniq	1828	1692	0.0743982
./GB941511_4lanes/TAGCAGTT_readname.txt.R1.bed.hg18.uniq	31796	23120	0.272865
./GB941511_4lanes/TCATCGTG_readname.txt.R1.bed.hg18.uniq	13205	9711	0.264597
./GB941511_4lanes/TCCGGTAT_readname.txt.R1.bed.hg18.uniq	13035	9924	0.238665
./GB941511_4lanes/TCGTTAGC_readname.txt.R1.bed.hg18.uniq	34894	25068	0.281596
./GB941511_4lanes/TGGCGTAT_readname.txt.R1.bed.hg18.uniq	2667	2092	0.215598
./GB941511_4lanes/TTCACTAG_readname.txt.R1.bed.hg18.uniq	1775	1679	0.0540845
./GB941512_4lanes/ACGTACGT_readname.txt.R1.bed.hg18.uniq	11109	10382	0.0654424
./GB941512_4lanes/AGCAATCC_readname.txt.R1.bed.hg18.uniq	54037	39235	0.273923
./GB941512_4lanes/AGGTTGCT_readname.txt.R1.bed.hg18.uniq	39427	27575	0.300606
./GB941512_4lanes/ATTGGCGT_readname.txt.R1.bed.hg18.uniq	171077	120876	0.293441
./GB941512_4lanes/CAAGATAT_readname.txt.R1.bed.hg18.uniq	8333	6251	0.24985
./GB941512_4lanes/CAAGGTCA_readname.txt.R1.bed.hg18.uniq	24866	17898	0.280222
./GB941512_4lanes/CACAGTTG_readname.txt.R1.bed.hg18.uniq	9905	7488	0.244018
./GB941512_4lanes/CAGTGATG_readname.txt.R1.bed.hg18.uniq	14749	10763	0.270256
./GB941512_4lanes/CCTAGTAG_readname.txt.R1.bed.hg18.uniq	21366	15532	0.273051
./GB941512_4lanes/CTTCGTTG_readname.txt.R1.bed.hg18.uniq	5032	3830	0.238871
./GB941512_4lanes/GACTAAGA_readname.txt.R1.bed.hg18.uniq	26560	19260	0.274849
./GB941512_4lanes/GACTGTGT_readname.txt.R1.bed.hg18.uniq	58477	41339	0.293072
./GB941512_4lanes/GTGAACGT_readname.txt.R1.bed.hg18.uniq	51993	36951	0.289308
./GB941512_4lanes/TAACGTGT_readname.txt.R1.bed.hg18.uniq	19117	13884	0.273735
./GB941512_4lanes/TAGACGGA_readname.txt.R1.bed.hg18.uniq	78215	55929	0.284933
./GB941512_4lanes/TAGCAGTT_readname.txt.R1.bed.hg18.uniq	29324	21728	0.259037
./GB941512_4lanes/TAGTTCTG_readname.txt.R1.bed.hg18.uniq	72259	51981	0.280629
./GB941512_4lanes/TCAAGTTG_readname.txt.R1.bed.hg18.uniq	1937	1679	0.133196
./GB941512_4lanes/TCCGGTAT_readname.txt.R1.bed.hg18.uniq	126971	91374	0.280355
./GB941512_4lanes/TCGTTAGC_readname.txt.R1.bed.hg18.uniq	25264	18271	0.276797
./GB941512_4lanes/TCTGTTGT_readname.txt.R1.bed.hg18.uniq	27519	20212	0.265526
./GB941512_4lanes/TGATGCGA_readname.txt.R1.bed.hg18.uniq	82361	58626	0.288183
./GB941512_4lanes/TGCAGACA_readname.txt.R1.bed.hg18.uniq	66178	47985	0.27491
./GB941512_4lanes/TGGACATG_readname.txt.R1.bed.hg18.uniq	22306	16119	0.277369
./GB941512_4lanes/TGGCGTAT_readname.txt.R1.bed.hg18.uniq	5333	3987	0.252391
./GB941513_4lanes/AAGAATCT_readname.txt.R1.bed.hg18.uniq	160907	120555	0.250778
./GB941513_4lanes/AAGAGGTT_readname.txt.R1.bed.hg18.uniq	114853	84206	0.266837
./GB941513_4lanes/AATCGGAT_readname.txt.R1.bed.hg18.uniq	170383	126660	0.256616
./GB941513_4lanes/AGAGTTGT_readname.txt.R1.bed.hg18.uniq	1186	1124	0.0522766
./GB941513_4lanes/AGGTTGCT_readname.txt.R1.bed.hg18.uniq	73461	53695	0.269068
./GB941513_4lanes/ATACGACT_readname.txt.R1.bed.hg18.uniq	1065	1014	0.0478873
./GB941513_4lanes/ATAGATAC_readname.txt.R1.bed.hg18.uniq	22866	16974	0.257675
./GB941513_4lanes/CAATGTGT_readname.txt.R1.bed.hg18.uniq	13382	10047	0.249215
./GB941513_4lanes/CTAAGTGT_readname.txt.R1.bed.hg18.uniq	7014	5303	0.243941
./GB941513_4lanes/CTAGTGTG_readname.txt.R1.bed.hg18.uniq	199508	147489	0.260736
./GB941513_4lanes/CTGCAATC_readname.txt.R1.bed.hg18.uniq	132201	97637	0.26145
./GB941513_4lanes/CTTCGTTG_readname.txt.R1.bed.hg18.uniq	1116	1040	0.0681004
./GB941513_4lanes/GAGACCTT_readname.txt.R1.bed.hg18.uniq	6087	4707	0.226713
./GB941513_4lanes/GATATTGT_readname.txt.R1.bed.hg18.uniq	6323	4936	0.219358
./GB941513_4lanes/GGATCATC_readname.txt.R1.bed.hg18.uniq	2293	1860	0.188836
./GB941513_4lanes/TACGCGTT_readname.txt.R1.bed.hg18.uniq	140288	100319	0.284907
./GB941513_4lanes/TAGACGGA_readname.txt.R1.bed.hg18.uniq	33301	24723	0.25759
./GB941513_4lanes/TCAGCTTG_readname.txt.R1.bed.hg18.uniq	4150	3214	0.225542
./GB941513_4lanes/TGATGCGA_readname.txt.R1.bed.hg18.uniq	78797	57774	0.266799
./GB941513_4lanes/TGCAGACA_readname.txt.R1.bed.hg18.uniq	15701	11659	0.257436
./GB941513_4lanes/TGGCGTAT_readname.txt.R1.bed.hg18.uniq	68828	50985	0.25924
./GB941513_4lanes/TTCACGAT_readname.txt.R1.bed.hg18.uniq	11864	8955	0.245196
./GB941514_4lanes/AATCGGAT_readname.txt.R1.bed.hg18.uniq	19210	13815	0.280843
./GB941514_4lanes/AGAGTTGT_readname.txt.R1.bed.hg18.uniq	64258	45925	0.285303
./GB941514_4lanes/AGGTTGCT_readname.txt.R1.bed.hg18.uniq	54862	39427	0.281342
./GB941514_4lanes/ATACGACT_readname.txt.R1.bed.hg18.uniq	1206	1139	0.0555556
./GB941514_4lanes/ATGACACC_readname.txt.R1.bed.hg18.uniq	24835	17972	0.276344
./GB941514_4lanes/ATGACTGT_readname.txt.R1.bed.hg18.uniq	18292	13263	0.274929
./GB941514_4lanes/CAAGGTCA_readname.txt.R1.bed.hg18.uniq	106768	74737	0.300006
./GB941514_4lanes/CAAGTCAC_readname.txt.R1.bed.hg18.uniq	334235	236189	0.293345
./GB941514_4lanes/CAATTCGT_readname.txt.R1.bed.hg18.uniq	68841	48996	0.288273
./GB941514_4lanes/CGAGAATG_readname.txt.R1.bed.hg18.uniq	19084	13420	0.296793
./GB941514_4lanes/CTCTGATT_readname.txt.R1.bed.hg18.uniq	8759	6544	0.252883
./GB941514_4lanes/CTTCGTTG_readname.txt.R1.bed.hg18.uniq	21409	15773	0.263254
./GB941514_4lanes/GAGCGATA_readname.txt.R1.bed.hg18.uniq	130553	91952	0.295673
./GB941514_4lanes/GATAACCA_readname.txt.R1.bed.hg18.uniq	69898	49755	0.288177
./GB941514_4lanes/GATGGCTT_readname.txt.R1.bed.hg18.uniq	23063	16913	0.266661
./GB941514_4lanes/GCTTAGTA_readname.txt.R1.bed.hg18.uniq	15305	10952	0.284417
./GB941514_4lanes/GGATCATC_readname.txt.R1.bed.hg18.uniq	8953	6529	0.270747
./GB941514_4lanes/GTTATATC_readname.txt.R1.bed.hg18.uniq	39327	28762	0.268645
./GB941514_4lanes/TACAGTGT_readname.txt.R1.bed.hg18.uniq	99531	70054	0.296159
./GB941514_4lanes/TAGTTCTG_readname.txt.R1.bed.hg18.uniq	14179	10374	0.268355
./GB941514_4lanes/TCTACTGT_readname.txt.R1.bed.hg18.uniq	9297	6984	0.24879
./GB941514_4lanes/TTCACTAG_readname.txt.R1.bed.hg18.uniq	1574	1335	0.151842
./GB941515_4lanes/AATGACAG_readname.txt.R1.bed.hg18.uniq	190402	133826	0.29714
./GB941515_4lanes/ACGTACGT_readname.txt.R1.bed.hg18.uniq	34513	25252	0.268334
./GB941515_4lanes/ACTGCATG_readname.txt.R1.bed.hg18.uniq	72008	52464	0.271414
./GB941515_4lanes/AGAGTTGT_readname.txt.R1.bed.hg18.uniq	1484	1403	0.0545822
./GB941515_4lanes/AGGCTTGA_readname.txt.R1.bed.hg18.uniq	48251	35251	0.269424
./GB941515_4lanes/AGGTTGCT_readname.txt.R1.bed.hg18.uniq	6208	4855	0.217945
./GB941515_4lanes/AGTTGACC_readname.txt.R1.bed.hg18.uniq	3898	2972	0.237558
./GB941515_4lanes/ATGACTGT_readname.txt.R1.bed.hg18.uniq	3945	3134	0.205577
./GB941515_4lanes/ATGGACTG_readname.txt.R1.bed.hg18.uniq	5385	4068	0.244568
./GB941515_4lanes/ATGGCTGT_readname.txt.R1.bed.hg18.uniq	1317	1251	0.0501139
./GB941515_4lanes/CATAACTT_readname.txt.R1.bed.hg18.uniq	90934	67027	0.262905
./GB941515_4lanes/CCTAGTAG_readname.txt.R1.bed.hg18.uniq	361871	266171	0.264459
./GB941515_4lanes/CCTCATGT_readname.txt.R1.bed.hg18.uniq	19489	14158	0.273539
./GB941515_4lanes/CGATTACA_readname.txt.R1.bed.hg18.uniq	6106	4672	0.234851
./GB941515_4lanes/CTAGTGTG_readname.txt.R1.bed.hg18.uniq	132937	97791	0.264381
./GB941515_4lanes/CTCTGATT_readname.txt.R1.bed.hg18.uniq	32621	23249	0.2873
./GB941515_4lanes/CTTCGTTG_readname.txt.R1.bed.hg18.uniq	2939	2413	0.178972
./GB941515_4lanes/GGTCAATG_readname.txt.R1.bed.hg18.uniq	19577	14536	0.257496
./GB941515_4lanes/GTGAACGT_readname.txt.R1.bed.hg18.uniq	36706	27273	0.256988
./GB941515_4lanes/GTTATATC_readname.txt.R1.bed.hg18.uniq	41388	31071	0.249275
./GB941515_4lanes/TACAGTGT_readname.txt.R1.bed.hg18.uniq	16775	12409	0.260268
./GB941515_4lanes/TAGACGGA_readname.txt.R1.bed.hg18.uniq	74060	54133	0.269066
./GB941515_4lanes/TAGTTCTG_readname.txt.R1.bed.hg18.uniq	91304	67388	0.261938
./GB941515_4lanes/TGGACATG_readname.txt.R1.bed.hg18.uniq	98766	72744	0.263471
./GB941515_4lanes/TTAAGCAT_readname.txt.R1.bed.hg18.uniq	11090	8447	0.238323
./GB941516_4lanes/AACTGCCA_readname.txt.R1.bed.hg18.uniq	100616	71666	0.287728
./GB941516_4lanes/ACGTACTC_readname.txt.R1.bed.hg18.uniq	49592	35533	0.283493
./GB941516_4lanes/AGAGTTGT_readname.txt.R1.bed.hg18.uniq	1170	1079	0.0777778
./GB941516_4lanes/AGGTTGCT_readname.txt.R1.bed.hg18.uniq	20194	14986	0.257898
./GB941516_4lanes/ATACGACT_readname.txt.R1.bed.hg18.uniq	1122	1059	0.0561497
./GB941516_4lanes/ATTAAGCG_readname.txt.R1.bed.hg18.uniq	293211	200690	0.315544
./GB941516_4lanes/ATTGGCGT_readname.txt.R1.bed.hg18.uniq	65267	47032	0.279391
./GB941516_4lanes/CAAGGTCA_readname.txt.R1.bed.hg18.uniq	34554	24720	0.284598
./GB941516_4lanes/CAATTCGT_readname.txt.R1.bed.hg18.uniq	6735	5145	0.23608
./GB941516_4lanes/CATATGCT_readname.txt.R1.bed.hg18.uniq	4255	3314	0.221152
./GB941516_4lanes/CCTAGTAG_readname.txt.R1.bed.hg18.uniq	5543	4320	0.220639
./GB941516_4lanes/CGTAATTA_readname.txt.R1.bed.hg18.uniq	80346	60001	0.253217
./GB941516_4lanes/CTCTGATT_readname.txt.R1.bed.hg18.uniq	14303	10796	0.245193
./GB941516_4lanes/CTTCGTTG_readname.txt.R1.bed.hg18.uniq	1110	1025	0.0765766
./GB941516_4lanes/GATAACCA_readname.txt.R1.bed.hg18.uniq	227931	161860	0.289873
./GB941516_4lanes/GATATTGT_readname.txt.R1.bed.hg18.uniq	14741	10496	0.287972
./GB941516_4lanes/TAAGGTGT_readname.txt.R1.bed.hg18.uniq	72551	52024	0.282932
./GB941516_4lanes/TACAGTGT_readname.txt.R1.bed.hg18.uniq	96270	68976	0.283515
./GB941516_4lanes/TCAGCTTG_readname.txt.R1.bed.hg18.uniq	2256	1723	0.236259
./GB941516_4lanes/TCCTGCTG_readname.txt.R1.bed.hg18.uniq	9052	6678	0.262262
./GB941516_4lanes/TGCAGACA_readname.txt.R1.bed.hg18.uniq	85695	61222	0.285583
./GB941517_4lanes/AAGAGGTT_readname.txt.R1.bed.hg18.uniq	2470	2095	0.151822
./GB941517_4lanes/ACGTACGT_readname.txt.R1.bed.hg18.uniq	43800	32688	0.253699
./GB941517_4lanes/AGAGTTGT_readname.txt.R1.bed.hg18.uniq	3419	2814	0.176952
./GB941517_4lanes/AGCAATCC_readname.txt.R1.bed.hg18.uniq	61804	45973	0.256148
./GB941517_4lanes/ATAGATAC_readname.txt.R1.bed.hg18.uniq	6479	5060	0.219015
./GB941517_4lanes/ATCTGATG_readname.txt.R1.bed.hg18.uniq	11028	8631	0.217356
./GB941517_4lanes/ATGACACC_readname.txt.R1.bed.hg18.uniq	41172	31188	0.242495
./GB941517_4lanes/ATGGCTGT_readname.txt.R1.bed.hg18.uniq	38686	29436	0.239105
./GB941517_4lanes/ATTAAGCG_readname.txt.R1.bed.hg18.uniq	65243	50205	0.230492
./GB941517_4lanes/CAGCTCTT_readname.txt.R1.bed.hg18.uniq	21929	16187	0.261845
./GB941517_4lanes/CAGTGATG_readname.txt.R1.bed.hg18.uniq	50364	38386	0.237829
./GB941517_4lanes/CATAACTT_readname.txt.R1.bed.hg18.uniq	2219	1772	0.201442
./GB941517_4lanes/CCTCATGT_readname.txt.R1.bed.hg18.uniq	144085	109133	0.242579
./GB941517_4lanes/CGTAATTA_readname.txt.R1.bed.hg18.uniq	26048	20193	0.224777
./GB941517_4lanes/CTAAGTGT_readname.txt.R1.bed.hg18.uniq	44560	34131	0.234044
./GB941517_4lanes/CTGACGTT_readname.txt.R1.bed.hg18.uniq	49308	37241	0.244727
./GB941517_4lanes/GAGCGATA_readname.txt.R1.bed.hg18.uniq	151965	111123	0.268759
./GB941517_4lanes/GGTCAATG_readname.txt.R1.bed.hg18.uniq	61276	46284	0.244663
./GB941517_4lanes/TACACTGT_readname.txt.R1.bed.hg18.uniq	28123	21383	0.239661
./GB941517_4lanes/TACGCGTT_readname.txt.R1.bed.hg18.uniq	36046	27180	0.245963
./GB941517_4lanes/TAGACGGA_readname.txt.R1.bed.hg18.uniq	58350	43842	0.248638
./GB941517_4lanes/TCCTGCTG_readname.txt.R1.bed.hg18.uniq	2326	1871	0.195615
./GB941517_4lanes/TTAAGCAT_readname.txt.R1.bed.hg18.uniq	34365	25883	0.246821
./GB941517_4lanes/TTCACTAG_readname.txt.R1.bed.hg18.uniq	46401	35347	0.238228
./GB941518_4lanes/AAGAGGTT_readname.txt.R1.bed.hg18.uniq	145782	104579	0.282634
./GB941518_4lanes/AATCGGAT_readname.txt.R1.bed.hg18.uniq	54802	39195	0.284789
./GB941518_4lanes/AGAATCAG_readname.txt.R1.bed.hg18.uniq	8900	6552	0.26382
./GB941518_4lanes/AGAGTTGT_readname.txt.R1.bed.hg18.uniq	11119	8365	0.247684
./GB941518_4lanes/AGCAATCC_readname.txt.R1.bed.hg18.uniq	13612	10067	0.260432
./GB941518_4lanes/ATACGACT_readname.txt.R1.bed.hg18.uniq	1499	1400	0.066044
./GB941518_4lanes/ATATGCTG_readname.txt.R1.bed.hg18.uniq	45778	33082	0.277338
./GB941518_4lanes/ATGACTGT_readname.txt.R1.bed.hg18.uniq	7477	5518	0.262003
./GB941518_4lanes/ATGGCTGT_readname.txt.R1.bed.hg18.uniq	108022	77440	0.283109
./GB941518_4lanes/ATTAAGCG_readname.txt.R1.bed.hg18.uniq	106278	76677	0.278524
./GB941518_4lanes/ATTGGCGT_readname.txt.R1.bed.hg18.uniq	5846	4450	0.238796
./GB941518_4lanes/CCTCATGT_readname.txt.R1.bed.hg18.uniq	102454	70213	0.314688
./GB941518_4lanes/CGTAATTA_readname.txt.R1.bed.hg18.uniq	33724	26109	0.225804
./GB941518_4lanes/GACTAAGA_readname.txt.R1.bed.hg18.uniq	40433	28949	0.284025
./GB941518_4lanes/GAGACCTT_readname.txt.R1.bed.hg18.uniq	8538	6342	0.257203
./GB941518_4lanes/GAGCGATA_readname.txt.R1.bed.hg18.uniq	77125	53843	0.301874
./GB941518_4lanes/GATAACCA_readname.txt.R1.bed.hg18.uniq	3320	2682	0.192169
./GB941518_4lanes/GATGGCTT_readname.txt.R1.bed.hg18.uniq	10064	7349	0.269773
./GB941518_4lanes/GGAACTGT_readname.txt.R1.bed.hg18.uniq	42044	30375	0.277543
./GB941518_4lanes/TACAGTGT_readname.txt.R1.bed.hg18.uniq	349023	240839	0.309962
./GB941518_4lanes/TCATCGTG_readname.txt.R1.bed.hg18.uniq	30375	21687	0.286025
./GB941518_4lanes/TCGTCGAT_readname.txt.R1.bed.hg18.uniq	104506	73950	0.292385
./GB941518_4lanes/TGATGCGA_readname.txt.R1.bed.hg18.uniq	6925	5184	0.251408
./GB941518_4lanes/TGGACATG_readname.txt.R1.bed.hg18.uniq	91464	65618	0.282581
./GB941518_4lanes/TTAAGCAT_readname.txt.R1.bed.hg18.uniq	89805	64710	0.279439
./GB941519_4lanes/AACTGCCA_readname.txt.R1.bed.hg18.uniq	7279	5392	0.259239
./GB941519_4lanes/ACGTACTC_readname.txt.R1.bed.hg18.uniq	1940	1577	0.187113
./GB941519_4lanes/AGAATCAG_readname.txt.R1.bed.hg18.uniq	5590	4229	0.24347
./GB941519_4lanes/AGAGTTGT_readname.txt.R1.bed.hg18.uniq	1158	1081	0.066494
./GB941519_4lanes/ATATGCTG_readname.txt.R1.bed.hg18.uniq	76882	56010	0.271481
./GB941519_4lanes/ATCTGATG_readname.txt.R1.bed.hg18.uniq	100009	72379	0.276275
./GB941519_4lanes/ATGACACC_readname.txt.R1.bed.hg18.uniq	10071	7592	0.246152
./GB941519_4lanes/CAAGATAT_readname.txt.R1.bed.hg18.uniq	60759	43540	0.283398
./GB941519_4lanes/CACTCTTG_readname.txt.R1.bed.hg18.uniq	183808	130724	0.288801
./GB941519_4lanes/CAGCTCTT_readname.txt.R1.bed.hg18.uniq	14215	10547	0.258037
./GB941519_4lanes/CATGGTGT_readname.txt.R1.bed.hg18.uniq	20269	14633	0.27806
./GB941519_4lanes/CGATTACA_readname.txt.R1.bed.hg18.uniq	7614	5758	0.243761
./GB941519_4lanes/GAGCGATA_readname.txt.R1.bed.hg18.uniq	156582	111578	0.287415
./GB941519_4lanes/GATGGCTT_readname.txt.R1.bed.hg18.uniq	19391	14058	0.275024
./GB941519_4lanes/GCGTAATT_readname.txt.R1.bed.hg18.uniq	14122	10231	0.275528
./GB941519_4lanes/GCTTAGTA_readname.txt.R1.bed.hg18.uniq	3131	2328	0.256468
./GB941519_4lanes/GGTCAATG_readname.txt.R1.bed.hg18.uniq	37982	27664	0.271655
./GB941519_4lanes/GTTATATC_readname.txt.R1.bed.hg18.uniq	16581	12363	0.254388
./GB941519_4lanes/TAACGTGT_readname.txt.R1.bed.hg18.uniq	19934	14477	0.273753
./GB941519_4lanes/TACGCGTT_readname.txt.R1.bed.hg18.uniq	24967	18049	0.277086
./GB941519_4lanes/TCCGGTAT_readname.txt.R1.bed.hg18.uniq	9597	7234	0.246223
./GB941519_4lanes/TCGATTAA_readname.txt.R1.bed.hg18.uniq	28400	20726	0.270211
./GB941519_4lanes/TCGTTAGC_readname.txt.R1.bed.hg18.uniq	230514	162703	0.294173
./GB941519_4lanes/TGGACATG_readname.txt.R1.bed.hg18.uniq	39069	26684	0.317003
./GB941519_4lanes/TTAAGCAT_readname.txt.R1.bed.hg18.uniq	5839	4533	0.223668
./GB941520_4lanes/AAGAATCT_readname.txt.R1.bed.hg18.uniq	143319	105546	0.263559
./GB941520_4lanes/AATCGGAT_readname.txt.R1.bed.hg18.uniq	50074	36699	0.267105
./GB941520_4lanes/AGAGTTGT_readname.txt.R1.bed.hg18.uniq	35694	26619	0.254244
./GB941520_4lanes/AGTTGACC_readname.txt.R1.bed.hg18.uniq	15408	11431	0.258113
./GB941520_4lanes/ATACGACT_readname.txt.R1.bed.hg18.uniq	23188	17147	0.260523
./GB941520_4lanes/ATAGATAC_readname.txt.R1.bed.hg18.uniq	2127	1667	0.216267
./GB941520_4lanes/ATATGCTG_readname.txt.R1.bed.hg18.uniq	72305	52162	0.278584
./GB941520_4lanes/ATCTGATG_readname.txt.R1.bed.hg18.uniq	1159	1087	0.0621225
./GB941520_4lanes/ATGGACTG_readname.txt.R1.bed.hg18.uniq	51450	37199	0.276987
./GB941520_4lanes/ATTAAGCG_readname.txt.R1.bed.hg18.uniq	10176	7698	0.243514
./GB941520_4lanes/CAATTCGT_readname.txt.R1.bed.hg18.uniq	5753	4488	0.219885
./GB941520_4lanes/CACTCTTG_readname.txt.R1.bed.hg18.uniq	59712	43703	0.268104
./GB941520_4lanes/CAGTGATG_readname.txt.R1.bed.hg18.uniq	28626	20845	0.271816
./GB941520_4lanes/CTAGTGTG_readname.txt.R1.bed.hg18.uniq	5593	4334	0.225103
./GB941520_4lanes/CTTCGTTG_readname.txt.R1.bed.hg18.uniq	1342	1261	0.0603577
./GB941520_4lanes/GACGTTAA_readname.txt.R1.bed.hg18.uniq	45305	32205	0.289151
./GB941520_4lanes/GACTGTGT_readname.txt.R1.bed.hg18.uniq	12077	8775	0.273412
./GB941520_4lanes/GGTCAATG_readname.txt.R1.bed.hg18.uniq	106285	75356	0.291001
./GB941520_4lanes/GTCTCCTA_readname.txt.R1.bed.hg18.uniq	6603	4952	0.250038
./GB941520_4lanes/GTTATATC_readname.txt.R1.bed.hg18.uniq	54413	39621	0.271847
./GB941520_4lanes/TAACCAAG_readname.txt.R1.bed.hg18.uniq	10455	7803	0.253659
./GB941520_4lanes/TACAGTGT_readname.txt.R1.bed.hg18.uniq	94935	68754	0.275778
./GB941520_4lanes/TCAAGTTG_readname.txt.R1.bed.hg18.uniq	89964	65153	0.275788
./GB941520_4lanes/TCCGGTAT_readname.txt.R1.bed.hg18.uniq	32788	23961	0.269214
./GB941520_4lanes/TCGATTAA_readname.txt.R1.bed.hg18.uniq	183947	130276	0.291774
./GB941521_4lanes/AATCGGAT_readname.txt.R1.bed.hg18.uniq	8972	6753	0.247325
./GB941521_4lanes/AGGTTGCT_readname.txt.R1.bed.hg18.uniq	8534	6527	0.235177
./GB941521_4lanes/AGTTGACC_readname.txt.R1.bed.hg18.uniq	3378	2615	0.225873
./GB941521_4lanes/ATACGACT_readname.txt.R1.bed.hg18.uniq	3123	2470	0.209094
./GB941521_4lanes/ATATGCTG_readname.txt.R1.bed.hg18.uniq	15615	11521	0.262184
./GB941521_4lanes/CAAGATAT_readname.txt.R1.bed.hg18.uniq	4933	3758	0.238192
./GB941521_4lanes/CAATTCGT_readname.txt.R1.bed.hg18.uniq	261187	190314	0.27135
./GB941521_4lanes/CACTCTTG_readname.txt.R1.bed.hg18.uniq	9628	7172	0.255089
./GB941521_4lanes/CAGCTCTT_readname.txt.R1.bed.hg18.uniq	70040	51455	0.265348
./GB941521_4lanes/CGAACTAC_readname.txt.R1.bed.hg18.uniq	19323	13970	0.277027
./GB941521_4lanes/CGATTACA_readname.txt.R1.bed.hg18.uniq	36683	26317	0.282583
./GB941521_4lanes/CTAAGTGT_readname.txt.R1.bed.hg18.uniq	10473	7630	0.27146
./GB941521_4lanes/CTTCGTTG_readname.txt.R1.bed.hg18.uniq	19778	14897	0.246789
./GB941521_4lanes/GAGACCTT_readname.txt.R1.bed.hg18.uniq	4222	3211	0.23946
./GB941521_4lanes/GATAACCA_readname.txt.R1.bed.hg18.uniq	104834	76533	0.26996
./GB941521_4lanes/GATGGCTT_readname.txt.R1.bed.hg18.uniq	6351	4836	0.238545
./GB941521_4lanes/TACACTGT_readname.txt.R1.bed.hg18.uniq	5999	4460	0.256543
./GB941521_4lanes/TAGACGGA_readname.txt.R1.bed.hg18.uniq	88696	64555	0.272177
./GB941521_4lanes/TAGCAGTT_readname.txt.R1.bed.hg18.uniq	119519	87598	0.267079
./GB941521_4lanes/TCATCGTG_readname.txt.R1.bed.hg18.uniq	20594	15041	0.269642
./GB941521_4lanes/TCCTGCTG_readname.txt.R1.bed.hg18.uniq	7048	5308	0.246879
./GB941521_4lanes/TCGATTAA_readname.txt.R1.bed.hg18.uniq	15926	11878	0.254176
./GB941521_4lanes/TCGTTAGC_readname.txt.R1.bed.hg18.uniq	17845	13072	0.26747
./GB941521_4lanes/TGGCGTAT_readname.txt.R1.bed.hg18.uniq	2461	1919	0.220236
./GB941521_4lanes/TTAAGCAT_readname.txt.R1.bed.hg18.uniq	13812	10431	0.244787
./GB941522_4lanes/AAGAATCT_readname.txt.R1.bed.hg18.uniq	126051	93356	0.259379
./GB941522_4lanes/AATGACAG_readname.txt.R1.bed.hg18.uniq	46965	34639	0.262451
./GB941522_4lanes/AGTTGACC_readname.txt.R1.bed.hg18.uniq	39983	29075	0.272816
./GB941522_4lanes/ATAGATAC_readname.txt.R1.bed.hg18.uniq	1285	1052	0.181323
./GB941522_4lanes/ATCTGATG_readname.txt.R1.bed.hg18.uniq	25132	18819	0.251194
./GB941522_4lanes/ATGGACTG_readname.txt.R1.bed.hg18.uniq	26766	19807	0.259994
./GB941522_4lanes/ATGGCTGT_readname.txt.R1.bed.hg18.uniq	9892	7416	0.250303
./GB941522_4lanes/CAAGTCAC_readname.txt.R1.bed.hg18.uniq	8797	6502	0.260884
./GB941522_4lanes/CAATTCGT_readname.txt.R1.bed.hg18.uniq	25612	18962	0.259644
./GB941522_4lanes/CATAACTT_readname.txt.R1.bed.hg18.uniq	63493	46105	0.273857
./GB941522_4lanes/CATGTGTG_readname.txt.R1.bed.hg18.uniq	13565	10105	0.255068
./GB941522_4lanes/CCTAGTAG_readname.txt.R1.bed.hg18.uniq	108675	78512	0.277552
./GB941522_4lanes/CTAAGTGT_readname.txt.R1.bed.hg18.uniq	6653	5047	0.241395
./GB941522_4lanes/CTAGTGTG_readname.txt.R1.bed.hg18.uniq	31617	23508	0.256476
./GB941522_4lanes/CTGCAATC_readname.txt.R1.bed.hg18.uniq	74176	54037	0.271503
./GB941522_4lanes/GAGACCTT_readname.txt.R1.bed.hg18.uniq	144566	101981	0.294571
./GB941522_4lanes/GATAACCA_readname.txt.R1.bed.hg18.uniq	18735	13670	0.27035
./GB941522_4lanes/GTACCGAT_readname.txt.R1.bed.hg18.uniq	27210	19688	0.276442
./GB941522_4lanes/TAGTTCTG_readname.txt.R1.bed.hg18.uniq	14629	10455	0.285324
./GB941522_4lanes/TCAGCTTG_readname.txt.R1.bed.hg18.uniq	14242	10698	0.248841
./GB941522_4lanes/TCGATTAA_readname.txt.R1.bed.hg18.uniq	7473	5663	0.242205
./GB941522_4lanes/TCGTTAGC_readname.txt.R1.bed.hg18.uniq	14730	10864	0.262458
./GB941522_4lanes/TTCACTAG_readname.txt.R1.bed.hg18.uniq	61343	45299	0.261546
./GB941523_4lanes/AAGAATCT_readname.txt.R1.bed.hg18.uniq	53044	39237	0.260293
./GB941523_4lanes/ACGTACGT_readname.txt.R1.bed.hg18.uniq	8626	6297	0.269998
./GB941523_4lanes/AGAGTTGT_readname.txt.R1.bed.hg18.uniq	2253	2156	0.0430537
./GB941523_4lanes/AGGCTTGA_readname.txt.R1.bed.hg18.uniq	76766	55002	0.283511
./GB941523_4lanes/ATACGACT_readname.txt.R1.bed.hg18.uniq	52085	37014	0.289354
./GB941523_4lanes/ATATGCTG_readname.txt.R1.bed.hg18.uniq	36604	26607	0.273112
./GB941523_4lanes/ATGACTGT_readname.txt.R1.bed.hg18.uniq	139407	100259	0.280818
./GB941523_4lanes/ATGGCTGT_readname.txt.R1.bed.hg18.uniq	8793	6794	0.22734
./GB941523_4lanes/ATTGGCGT_readname.txt.R1.bed.hg18.uniq	30131	28451	0.0557565
./GB941523_4lanes/CACTCTTG_readname.txt.R1.bed.hg18.uniq	51275	36879	0.280761
./GB941523_4lanes/CATATGCT_readname.txt.R1.bed.hg18.uniq	94135	72208	0.232931
./GB941523_4lanes/CATGTAGA_readname.txt.R1.bed.hg18.uniq	10867	8065	0.257845
./GB941523_4lanes/CGTAATTA_readname.txt.R1.bed.hg18.uniq	16946	13177	0.222412
./GB941523_4lanes/CTAAGTGT_readname.txt.R1.bed.hg18.uniq	6331	4805	0.241036
./GB941523_4lanes/CTTCGTTG_readname.txt.R1.bed.hg18.uniq	1864	1796	0.0364807
./GB941523_4lanes/GAGCGATA_readname.txt.R1.bed.hg18.uniq	76302	54945	0.279901
./GB941523_4lanes/GATGGCTT_readname.txt.R1.bed.hg18.uniq	8391	6350	0.243237
./GB941523_4lanes/TAACGTGT_readname.txt.R1.bed.hg18.uniq	80441	56457	0.298156
./GB941523_4lanes/TACAGTGT_readname.txt.R1.bed.hg18.uniq	8766	6710	0.234543
./GB941523_4lanes/TACGCGTT_readname.txt.R1.bed.hg18.uniq	138499	99878	0.278854
./GB941523_4lanes/TCATCGTG_readname.txt.R1.bed.hg18.uniq	17151	12333	0.280917
./GB941523_4lanes/TCGTCGAT_readname.txt.R1.bed.hg18.uniq	6239	4699	0.246834
./GB941523_4lanes/TCTACTGT_readname.txt.R1.bed.hg18.uniq	34859	25550	0.267047
./GB941523_4lanes/TGCAGACA_readname.txt.R1.bed.hg18.uniq	104531	75212	0.280481
./GB941523_4lanes/TTAAGCAT_readname.txt.R1.bed.hg18.uniq	40580	29701	0.268088
./GB941524_4lanes/AAGAATCT_readname.txt.R1.bed.hg18.uniq	28218	20908	0.259055
./GB941524_4lanes/AATCGGAT_readname.txt.R1.bed.hg18.uniq	15224	11372	0.253022
./GB941524_4lanes/ACACACGT_readname.txt.R1.bed.hg18.uniq	52478	38029	0.275334
./GB941524_4lanes/ACGTACTC_readname.txt.R1.bed.hg18.uniq	20691	15208	0.264994
./GB941524_4lanes/AGAGTTGT_readname.txt.R1.bed.hg18.uniq	46214	33632	0.272255
./GB941524_4lanes/ATCTGATG_readname.txt.R1.bed.hg18.uniq	165952	121146	0.269994
./GB941524_4lanes/ATGGCTGT_readname.txt.R1.bed.hg18.uniq	110552	80323	0.273437
./GB941524_4lanes/CAAGGTCA_readname.txt.R1.bed.hg18.uniq	63130	45594	0.277776
./GB941524_4lanes/CAATGTGT_readname.txt.R1.bed.hg18.uniq	8701	6612	0.240087
./GB941524_4lanes/CATGTGTG_readname.txt.R1.bed.hg18.uniq	33296	24146	0.274808
./GB941524_4lanes/CCTCATGT_readname.txt.R1.bed.hg18.uniq	26422	19490	0.262357
./GB941524_4lanes/CGAGAATG_readname.txt.R1.bed.hg18.uniq	94677	68115	0.280554
./GB941524_4lanes/CGATTACA_readname.txt.R1.bed.hg18.uniq	81585	59752	0.26761
./GB941524_4lanes/CTAGTGTG_readname.txt.R1.bed.hg18.uniq	9405	6976	0.258267
./GB941524_4lanes/CTCTGATT_readname.txt.R1.bed.hg18.uniq	41361	30486	0.262929
./GB941524_4lanes/GAGCGATA_readname.txt.R1.bed.hg18.uniq	23949	17195	0.282016
./GB941524_4lanes/GCGTAATT_readname.txt.R1.bed.hg18.uniq	115110	82746	0.281157
./GB941524_4lanes/GCTTAGTA_readname.txt.R1.bed.hg18.uniq	8693	6405	0.2632
./GB941524_4lanes/TAACGTGT_readname.txt.R1.bed.hg18.uniq	81691	58114	0.288612
./GB941524_4lanes/TACAGTGT_readname.txt.R1.bed.hg18.uniq	30815	21809	0.29226
./GB941524_4lanes/TCAAGTTG_readname.txt.R1.bed.hg18.uniq	43711	32074	0.266226
./GB941524_4lanes/TCAGCTTG_readname.txt.R1.bed.hg18.uniq	17488	13033	0.254746
./GB941524_4lanes/TCATCGTG_readname.txt.R1.bed.hg18.uniq	14059	12269	0.127321
./GB941524_4lanes/TGATGCGA_readname.txt.R1.bed.hg18.uniq	76442	55021	0.280226
./GB941524_4lanes/TTAAGCAT_readname.txt.R1.bed.hg18.uniq	82792	60174	0.273191
./GB941525_4lanes/AGGCTTGA_readname.txt.R1.bed.hg18.uniq	3276	2547	0.222527
./GB941525_4lanes/ATGGCTGT_readname.txt.R1.bed.hg18.uniq	9185	6877	0.251279
./GB941525_4lanes/ATTGGCGT_readname.txt.R1.bed.hg18.uniq	64838	46866	0.277183
./GB941525_4lanes/CAAGGTCA_readname.txt.R1.bed.hg18.uniq	121400	85213	0.298081
./GB941525_4lanes/CACAGTTG_readname.txt.R1.bed.hg18.uniq	31705	23380	0.262577
./GB941525_4lanes/CATGTATT_readname.txt.R1.bed.hg18.uniq	3273	2466	0.246563
./GB941525_4lanes/CGAACTAC_readname.txt.R1.bed.hg18.uniq	15392	11433	0.257212
./GB941525_4lanes/CGAGAATG_readname.txt.R1.bed.hg18.uniq	7163	5400	0.246126
./GB941525_4lanes/CGTAATTA_readname.txt.R1.bed.hg18.uniq	11678	9159	0.215705
./GB941525_4lanes/CTAGTGTG_readname.txt.R1.bed.hg18.uniq	2179	1735	0.203763
./GB941525_4lanes/CTCTGATT_readname.txt.R1.bed.hg18.uniq	9746	7261	0.254976
./GB941525_4lanes/CTGACGTT_readname.txt.R1.bed.hg18.uniq	246397	177349	0.280231
./GB941525_4lanes/CTTCGTTG_readname.txt.R1.bed.hg18.uniq	1248	1175	0.0584936
./GB941525_4lanes/GAGACCTT_readname.txt.R1.bed.hg18.uniq	32366	23205	0.283044
./GB941525_4lanes/GATATTGT_readname.txt.R1.bed.hg18.uniq	46446	33487	0.279012
./GB941525_4lanes/GATGGCTT_readname.txt.R1.bed.hg18.uniq	4821	3650	0.242896
./GB941525_4lanes/GTACCGAT_readname.txt.R1.bed.hg18.uniq	52667	38082	0.276929
./GB941525_4lanes/GTTATATC_readname.txt.R1.bed.hg18.uniq	21344	15744	0.262369
./GB941525_4lanes/TAACGTGT_readname.txt.R1.bed.hg18.uniq	187896	133148	0.291374
./GB941525_4lanes/TACAGTGT_readname.txt.R1.bed.hg18.uniq	38663	27527	0.288027
./GB941525_4lanes/TACGCGTT_readname.txt.R1.bed.hg18.uniq	46969	33141	0.294407
./GB941525_4lanes/TAGACGGA_readname.txt.R1.bed.hg18.uniq	50049	35520	0.290296
./GB941525_4lanes/TCCTGCTG_readname.txt.R1.bed.hg18.uniq	34342	24680	0.281346
./GB941525_4lanes/TGCAGACA_readname.txt.R1.bed.hg18.uniq	24585	18095	0.263982
./GB941525_4lanes/TGGCGTAT_readname.txt.R1.bed.hg18.uniq	44999	32743	0.272362
./GB941526_4lanes/ACGTACTC_readname.txt.R1.bed.hg18.uniq	33497	24187	0.277935
./GB941526_4lanes/AGGCTTGA_readname.txt.R1.bed.hg18.uniq	52598	37588	0.285372
./GB941526_4lanes/AGTTGACC_readname.txt.R1.bed.hg18.uniq	125957	91658	0.272307
./GB941526_4lanes/ATACGACT_readname.txt.R1.bed.hg18.uniq	103871	73488	0.292507
./GB941526_4lanes/ATCTGATG_readname.txt.R1.bed.hg18.uniq	34420	25087	0.27115
./GB941526_4lanes/ATGACACC_readname.txt.R1.bed.hg18.uniq	29069	21298	0.267329
./GB941526_4lanes/ATGACTGT_readname.txt.R1.bed.hg18.uniq	73001	53174	0.271599
./GB941526_4lanes/ATTGGCGT_readname.txt.R1.bed.hg18.uniq	10026	9141	0.0882705
./GB941526_4lanes/CAAGATAT_readname.txt.R1.bed.hg18.uniq	31819	23465	0.262548
./GB941526_4lanes/CAATGTGT_readname.txt.R1.bed.hg18.uniq	24636	18081	0.266074
./GB941526_4lanes/CACTCTTG_readname.txt.R1.bed.hg18.uniq	9660	7302	0.244099
./GB941526_4lanes/CAGCTCTT_readname.txt.R1.bed.hg18.uniq	13172	9803	0.25577
./GB941526_4lanes/CAGTGATG_readname.txt.R1.bed.hg18.uniq	81843	58650	0.283384
./GB941526_4lanes/CATAACTT_readname.txt.R1.bed.hg18.uniq	62695	45814	0.269256
./GB941526_4lanes/CTCTGATT_readname.txt.R1.bed.hg18.uniq	108904	79503	0.269972
./GB941526_4lanes/CTGACGTT_readname.txt.R1.bed.hg18.uniq	36488	26227	0.281216
./GB941526_4lanes/GACTAAGA_readname.txt.R1.bed.hg18.uniq	56690	41110	0.274828
./GB941526_4lanes/GATGGCTT_readname.txt.R1.bed.hg18.uniq	57195	41132	0.280846
./GB941526_4lanes/GCGTAATT_readname.txt.R1.bed.hg18.uniq	173621	123859	0.286613
./GB941526_4lanes/GGATCATC_readname.txt.R1.bed.hg18.uniq	41691	29959	0.281404
./GB941526_4lanes/GTCTCCTA_readname.txt.R1.bed.hg18.uniq	68122	49091	0.279366
./GB941526_4lanes/TACACTGT_readname.txt.R1.bed.hg18.uniq	298782	202151	0.323416
./GB941526_4lanes/TACAGTGT_readname.txt.R1.bed.hg18.uniq	11042	8040	0.271871
./GB941526_4lanes/TAGTTCTG_readname.txt.R1.bed.hg18.uniq	59951	44008	0.265934
./GB941526_4lanes/TCATCGTG_readname.txt.R1.bed.hg18.uniq	14887	11081	0.255659
./GB941527_4lanes/ACACACGT_readname.txt.R1.bed.hg18.uniq	9152	6788	0.258304
./GB941527_4lanes/AGCAATCC_readname.txt.R1.bed.hg18.uniq	20272	15184	0.250987
./GB941527_4lanes/AGGTTGCT_readname.txt.R1.bed.hg18.uniq	7543	5637	0.252685
./GB941527_4lanes/CAAGATAT_readname.txt.R1.bed.hg18.uniq	79614	58460	0.265707
./GB941527_4lanes/CAATGTGT_readname.txt.R1.bed.hg18.uniq	32604	23728	0.272237
./GB941527_4lanes/CACTCTTG_readname.txt.R1.bed.hg18.uniq	24988	18617	0.254962
./GB941527_4lanes/CGTAATTA_readname.txt.R1.bed.hg18.uniq	1260	1031	0.181746
./GB941527_4lanes/GACTGTGT_readname.txt.R1.bed.hg18.uniq	18399	13270	0.278765
./GB941527_4lanes/GAGCGATA_readname.txt.R1.bed.hg18.uniq	4292	3286	0.23439
./GB941527_4lanes/GGATCATC_readname.txt.R1.bed.hg18.uniq	4712	3535	0.249788
./GB941527_4lanes/GGTCAATG_readname.txt.R1.bed.hg18.uniq	65686	48367	0.263663
./GB941527_4lanes/GTCTCCTA_readname.txt.R1.bed.hg18.uniq	1755	1411	0.196011
./GB941527_4lanes/TACGCGTT_readname.txt.R1.bed.hg18.uniq	13487	9836	0.270705
./GB941527_4lanes/TAGACGGA_readname.txt.R1.bed.hg18.uniq	9477	7197	0.240582
./GB941527_4lanes/TAGTTCTG_readname.txt.R1.bed.hg18.uniq	5996	4540	0.242829
./GB941527_4lanes/TCGTCGAT_readname.txt.R1.bed.hg18.uniq	67558	49048	0.273987
./GB941527_4lanes/TCTGTTGT_readname.txt.R1.bed.hg18.uniq	3302	2517	0.237735
./GB941527_4lanes/TGATGCGA_readname.txt.R1.bed.hg18.uniq	72423	51992	0.282107
./GB941527_4lanes/TGGACATG_readname.txt.R1.bed.hg18.uniq	142638	104164	0.269732
./GB941528_4lanes/ACACACGT_readname.txt.R1.bed.hg18.uniq	58055	41500	0.285161
./GB941528_4lanes/AGAATCAG_readname.txt.R1.bed.hg18.uniq	44873	32598	0.27355
./GB941528_4lanes/AGAGTTGT_readname.txt.R1.bed.hg18.uniq	1381	1311	0.0506879
./GB941528_4lanes/AGTTGACC_readname.txt.R1.bed.hg18.uniq	28747	20556	0.284934
./GB941528_4lanes/ATCTGATG_readname.txt.R1.bed.hg18.uniq	1352	1288	0.0473373
./GB941528_4lanes/ATTAAGCG_readname.txt.R1.bed.hg18.uniq	7464	5711	0.234861
./GB941528_4lanes/CAATGTGT_readname.txt.R1.bed.hg18.uniq	106917	74540	0.302824
./GB941528_4lanes/CAATTCGT_readname.txt.R1.bed.hg18.uniq	67813	48781	0.280654
./GB941528_4lanes/CACTCTTG_readname.txt.R1.bed.hg18.uniq	2317	1852	0.200691
./GB941528_4lanes/CATGTGTG_readname.txt.R1.bed.hg18.uniq	21538	15668	0.272542
./GB941528_4lanes/CCTAGTAG_readname.txt.R1.bed.hg18.uniq	36663	26912	0.265963
./GB941528_4lanes/CTAAGTGT_readname.txt.R1.bed.hg18.uniq	22607	16455	0.272128
./GB941528_4lanes/CTCTGATT_readname.txt.R1.bed.hg18.uniq	27007	19910	0.262784
./GB941528_4lanes/CTGACGTT_readname.txt.R1.bed.hg18.uniq	19465	14097	0.275777
./GB941528_4lanes/CTGCAATC_readname.txt.R1.bed.hg18.uniq	24962	18193	0.271172
./GB941528_4lanes/GACTAAGA_readname.txt.R1.bed.hg18.uniq	4893	3647	0.254649
./GB941528_4lanes/GACTGTGT_readname.txt.R1.bed.hg18.uniq	105622	77018	0.270815
./GB941528_4lanes/GAGCGATA_readname.txt.R1.bed.hg18.uniq	89510	63887	0.286259
./GB941528_4lanes/GATAACCA_readname.txt.R1.bed.hg18.uniq	11261	8364	0.25726
./GB941528_4lanes/GATGGCTT_readname.txt.R1.bed.hg18.uniq	5851	4425	0.243719
./GB941528_4lanes/GTCTCCTA_readname.txt.R1.bed.hg18.uniq	44908	32561	0.27494
./GB941528_4lanes/TAACCAAG_readname.txt.R1.bed.hg18.uniq	262432	187996	0.283639
./GB941528_4lanes/TAGACGGA_readname.txt.R1.bed.hg18.uniq	78629	56201	0.285238
./GB941528_4lanes/TAGCAGTT_readname.txt.R1.bed.hg18.uniq	52160	37945	0.272527
./GB941528_4lanes/TCGTTAGC_readname.txt.R1.bed.hg18.uniq	33360	24345	0.270234
./GB941529_4lanes/AACTGCCA_readname.txt.R1.bed.hg18.uniq	179923	123648	0.312773
./GB941529_4lanes/AAGAGGTT_readname.txt.R1.bed.hg18.uniq	151630	105821	0.30211
./GB941529_4lanes/AATGACAG_readname.txt.R1.bed.hg18.uniq	86535	61436	0.290044
./GB941529_4lanes/ACGTACGT_readname.txt.R1.bed.hg18.uniq	11226	8079	0.280331
./GB941529_4lanes/AGAATCAG_readname.txt.R1.bed.hg18.uniq	4395	3359	0.235722
./GB941529_4lanes/AGAGTTGT_readname.txt.R1.bed.hg18.uniq	27827	20536	0.262012
./GB941529_4lanes/AGGCTTGA_readname.txt.R1.bed.hg18.uniq	11082	8130	0.266378
./GB941529_4lanes/ATACGACT_readname.txt.R1.bed.hg18.uniq	1166	1093	0.0626072
./GB941529_4lanes/ATGGCTGT_readname.txt.R1.bed.hg18.uniq	59849	43335	0.275928
./GB941529_4lanes/CAAGGTCA_readname.txt.R1.bed.hg18.uniq	95972	67869	0.292825
./GB941529_4lanes/CAATGTGT_readname.txt.R1.bed.hg18.uniq	41864	30022	0.282868
./GB941529_4lanes/CAGCTCTT_readname.txt.R1.bed.hg18.uniq	8059	6020	0.253009
./GB941529_4lanes/CAGTGATG_readname.txt.R1.bed.hg18.uniq	1125	1024	0.0897778
./GB941529_4lanes/CGATTACA_readname.txt.R1.bed.hg18.uniq	9226	6827	0.260026
./GB941529_4lanes/CTGCAATC_readname.txt.R1.bed.hg18.uniq	18111	13102	0.276572
./GB941529_4lanes/CTTCGTTG_readname.txt.R1.bed.hg18.uniq	22058	16416	0.25578
./GB941529_4lanes/GATAACCA_readname.txt.R1.bed.hg18.uniq	1115	1042	0.0654709
./GB941529_4lanes/GATGGCTT_readname.txt.R1.bed.hg18.uniq	8979	6564	0.268961
./GB941529_4lanes/GCGTAATT_readname.txt.R1.bed.hg18.uniq	15289	11097	0.274184
./GB941529_4lanes/GGATCATC_readname.txt.R1.bed.hg18.uniq	1640	1402	0.145122
./GB941529_4lanes/GTTATATC_readname.txt.R1.bed.hg18.uniq	87496	62867	0.281487
./GB941529_4lanes/TACACTGT_readname.txt.R1.bed.hg18.uniq	13944	10103	0.275459
./GB941529_4lanes/TCGATTAA_readname.txt.R1.bed.hg18.uniq	17547	12947	0.262153
./GB941529_4lanes/TGAGCGAA_readname.txt.R1.bed.hg18.uniq	26199	19090	0.271346
./GB941529_4lanes/TGCAGACA_readname.txt.R1.bed.hg18.uniq	76452	55248	0.27735
./GB941530_4lanes/AATGACAG_readname.txt.R1.bed.hg18.uniq	129972	90534	0.303435
./GB941530_4lanes/ACACACGT_readname.txt.R1.bed.hg18.uniq	11719	8277	0.293711
./GB941530_4lanes/ACGTACTC_readname.txt.R1.bed.hg18.uniq	40106	27445	0.315688
./GB941530_4lanes/AGAGTTGT_readname.txt.R1.bed.hg18.uniq	43796	31557	0.279455
./GB941530_4lanes/AGGCTTGA_readname.txt.R1.bed.hg18.uniq	13758	9837	0.284998
./GB941530_4lanes/AGGTTGCT_readname.txt.R1.bed.hg18.uniq	112114	78483	0.299971
./GB941530_4lanes/CACAGTTG_readname.txt.R1.bed.hg18.uniq	82592	57785	0.300356
./GB941530_4lanes/CAGTGATG_readname.txt.R1.bed.hg18.uniq	169895	118090	0.304924
./GB941530_4lanes/CATGTATT_readname.txt.R1.bed.hg18.uniq	87903	61881	0.296031
./GB941530_4lanes/CGAGAATG_readname.txt.R1.bed.hg18.uniq	14763	10541	0.285985
./GB941530_4lanes/CGATTACA_readname.txt.R1.bed.hg18.uniq	12467	8762	0.297185
./GB941530_4lanes/GACTAAGA_readname.txt.R1.bed.hg18.uniq	27270	19176	0.29681
./GB941530_4lanes/GAGCGATA_readname.txt.R1.bed.hg18.uniq	7658	5625	0.265474
./GB941530_4lanes/GATATTGT_readname.txt.R1.bed.hg18.uniq	7406	5531	0.253173
./GB941530_4lanes/GTTATATC_readname.txt.R1.bed.hg18.uniq	23836	17187	0.278948
./GB941530_4lanes/TACAGTGT_readname.txt.R1.bed.hg18.uniq	129893	90424	0.303858
./GB941530_4lanes/TACGCGTT_readname.txt.R1.bed.hg18.uniq	13740	9828	0.284716
./GB941530_4lanes/TCCGGTAT_readname.txt.R1.bed.hg18.uniq	12273	8938	0.271735
./GB941530_4lanes/TCGATTAA_readname.txt.R1.bed.hg18.uniq	451574	315870	0.300513
./GB941530_4lanes/TCGTCGAT_readname.txt.R1.bed.hg18.uniq	55780	38765	0.305038
./GB941530_4lanes/TCGTTAGC_readname.txt.R1.bed.hg18.uniq	100090	69633	0.304296
./GB941530_4lanes/TCTACTGT_readname.txt.R1.bed.hg18.uniq	192900	136151	0.294189
./GB941530_4lanes/TCTGTTGT_readname.txt.R1.bed.hg18.uniq	6433	4748	0.261931
./GB941530_4lanes/TGGCGTAT_readname.txt.R1.bed.hg18.uniq	5307	3875	0.269832
./GB941530_4lanes/TTAAGCAT_readname.txt.R1.bed.hg18.uniq	11174	8142	0.271344
./GB941531_4lanes/AAGAATCT_readname.txt.R1.bed.hg18.uniq	36116	27166	0.247813
./GB941531_4lanes/AGAATCAG_readname.txt.R1.bed.hg18.uniq	10893	8202	0.247039
./GB941531_4lanes/AGGTTGCT_readname.txt.R1.bed.hg18.uniq	38786	29055	0.250889
./GB941531_4lanes/ATACGACT_readname.txt.R1.bed.hg18.uniq	6439	4967	0.228607
./GB941531_4lanes/ATGGACTG_readname.txt.R1.bed.hg18.uniq	28851	21451	0.25649
./GB941531_4lanes/ATGGCTGT_readname.txt.R1.bed.hg18.uniq	90203	66423	0.263628
./GB941531_4lanes/CAATTCGT_readname.txt.R1.bed.hg18.uniq	95766	71566	0.252699
./GB941531_4lanes/CACAGTTG_readname.txt.R1.bed.hg18.uniq	9352	7245	0.225299
./GB941531_4lanes/CAGTGATG_readname.txt.R1.bed.hg18.uniq	35180	25566	0.27328
./GB941531_4lanes/CATAACTT_readname.txt.R1.bed.hg18.uniq	28563	21444	0.249239
./GB941531_4lanes/CATGTGTG_readname.txt.R1.bed.hg18.uniq	24459	18263	0.253322
./GB941531_4lanes/CGAACTAC_readname.txt.R1.bed.hg18.uniq	21516	15988	0.256925
./GB941531_4lanes/CGTAATTA_readname.txt.R1.bed.hg18.uniq	4567	3566	0.219181
./GB941531_4lanes/CTCTGATT_readname.txt.R1.bed.hg18.uniq	20909	15902	0.239466
./GB941531_4lanes/CTGACGTT_readname.txt.R1.bed.hg18.uniq	8530	6371	0.253107
./GB941531_4lanes/CTGCAATC_readname.txt.R1.bed.hg18.uniq	51082	37788	0.260248
./GB941531_4lanes/GACTGTGT_readname.txt.R1.bed.hg18.uniq	22939	16999	0.258948
./GB941531_4lanes/GAGACCTT_readname.txt.R1.bed.hg18.uniq	32775	24057	0.265995
./GB941531_4lanes/GGATCATC_readname.txt.R1.bed.hg18.uniq	174816	128846	0.262962
./GB941531_4lanes/GTACCGAT_readname.txt.R1.bed.hg18.uniq	35217	25437	0.277707
./GB941531_4lanes/TCAGCTTG_readname.txt.R1.bed.hg18.uniq	1632	1339	0.179534
./GB941531_4lanes/TCCTGCTG_readname.txt.R1.bed.hg18.uniq	84035	62621	0.254822
./GB941531_4lanes/TCGTCGAT_readname.txt.R1.bed.hg18.uniq	10779	8066	0.251693
./GB941531_4lanes/TGGCGTAT_readname.txt.R1.bed.hg18.uniq	3769	2983	0.208543
./GB941531_4lanes/TTCACTAG_readname.txt.R1.bed.hg18.uniq	75303	55637	0.261158
./GB941532_4lanes/AAGAGGTT_readname.txt.R1.bed.hg18.uniq	21229	15340	0.277404
./GB941532_4lanes/AATCGGAT_readname.txt.R1.bed.hg18.uniq	16285	11982	0.264231
./GB941532_4lanes/AATGACAG_readname.txt.R1.bed.hg18.uniq	31493	22784	0.276538
./GB941532_4lanes/AGAGTTGT_readname.txt.R1.bed.hg18.uniq	76120	54888	0.278928
./GB941532_4lanes/AGGTTGCT_readname.txt.R1.bed.hg18.uniq	46233	33361	0.278416
./GB941532_4lanes/ATACGACT_readname.txt.R1.bed.hg18.uniq	111497	75307	0.324583
./GB941532_4lanes/ATCTGATG_readname.txt.R1.bed.hg18.uniq	1431	1339	0.0642907
./GB941532_4lanes/ATGGACTG_readname.txt.R1.bed.hg18.uniq	95777	68831	0.281341
./GB941532_4lanes/ATGGCTGT_readname.txt.R1.bed.hg18.uniq	48516	35073	0.277084
./GB941532_4lanes/ATTAAGCG_readname.txt.R1.bed.hg18.uniq	22431	16893	0.24689
./GB941532_4lanes/CACAGTTG_readname.txt.R1.bed.hg18.uniq	20562	15080	0.266608
./GB941532_4lanes/CACTCTTG_readname.txt.R1.bed.hg18.uniq	87125	63543	0.270669
./GB941532_4lanes/CATGGTGT_readname.txt.R1.bed.hg18.uniq	37291	27275	0.26859
./GB941532_4lanes/CGATTACA_readname.txt.R1.bed.hg18.uniq	26721	19530	0.269114
./GB941532_4lanes/CTTCGTTG_readname.txt.R1.bed.hg18.uniq	5624	4403	0.217105
./GB941532_4lanes/GAGCGATA_readname.txt.R1.bed.hg18.uniq	213676	152204	0.287688
./GB941532_4lanes/GGATCATC_readname.txt.R1.bed.hg18.uniq	5329	3999	0.249578
./GB941532_4lanes/GTACCGAT_readname.txt.R1.bed.hg18.uniq	8592	6352	0.260708
./GB941532_4lanes/GTGAACGT_readname.txt.R1.bed.hg18.uniq	13701	9937	0.274724
./GB941532_4lanes/TAAGGTGT_readname.txt.R1.bed.hg18.uniq	18977	14119	0.255994
./GB941532_4lanes/TACACTGT_readname.txt.R1.bed.hg18.uniq	18058	12998	0.280208
./GB941532_4lanes/TACGCGTT_readname.txt.R1.bed.hg18.uniq	13887	10354	0.254411
./GB941532_4lanes/TCCGGTAT_readname.txt.R1.bed.hg18.uniq	105291	76573	0.272749
./GB941532_4lanes/TGCAGACA_readname.txt.R1.bed.hg18.uniq	12496	11787	0.0567382
./GB941532_4lanes/TTCACTAG_readname.txt.R1.bed.hg18.uniq	5278	4091	0.224896
./GB941533_4lanes/AACTGCCA_readname.txt.R1.bed.hg18.uniq	4917	3911	0.204596
./GB941533_4lanes/ACGTACGT_readname.txt.R1.bed.hg18.uniq	14006	10620	0.241754
./GB941533_4lanes/AGAGTTGT_readname.txt.R1.bed.hg18.uniq	12125	9641	0.204866
./GB941533_4lanes/AGCAATCC_readname.txt.R1.bed.hg18.uniq	8245	6462	0.216252
./GB941533_4lanes/AGGCTTGA_readname.txt.R1.bed.hg18.uniq	29005	22006	0.241303
./GB941533_4lanes/AGGTTGCT_readname.txt.R1.bed.hg18.uniq	8122	6439	0.207215
./GB941533_4lanes/ATAGATAC_readname.txt.R1.bed.hg18.uniq	4769	3787	0.205913
./GB941533_4lanes/ATTGGCGT_readname.txt.R1.bed.hg18.uniq	27833	21708	0.220063
./GB941533_4lanes/CAAGTCAC_readname.txt.R1.bed.hg18.uniq	206557	158095	0.234618
./GB941533_4lanes/CACAGTTG_readname.txt.R1.bed.hg18.uniq	5750	4555	0.207826
./GB941533_4lanes/CGTAATTA_readname.txt.R1.bed.hg18.uniq	7665	6447	0.158904
./GB941533_4lanes/CTAGTGTG_readname.txt.R1.bed.hg18.uniq	15376	12020	0.218262
./GB941533_4lanes/CTTCGTTG_readname.txt.R1.bed.hg18.uniq	35749	27518	0.230244
./GB941533_4lanes/GATATTGT_readname.txt.R1.bed.hg18.uniq	72744	55739	0.233765
./GB941533_4lanes/GATGGCTT_readname.txt.R1.bed.hg18.uniq	4226	3389	0.19806
./GB941533_4lanes/GCGTAATT_readname.txt.R1.bed.hg18.uniq	5560	4353	0.217086
./GB941533_4lanes/GGATCATC_readname.txt.R1.bed.hg18.uniq	58742	45145	0.23147
./GB941533_4lanes/GTCTCCTA_readname.txt.R1.bed.hg18.uniq	11049	8525	0.228437
./GB941533_4lanes/GTGAACGT_readname.txt.R1.bed.hg18.uniq	3467	2778	0.198731
./GB941533_4lanes/TAGCAGTT_readname.txt.R1.bed.hg18.uniq	72747	55784	0.233178
./GB941533_4lanes/TCAAGTTG_readname.txt.R1.bed.hg18.uniq	69293	53353	0.230038
./GB941533_4lanes/TCATCGTG_readname.txt.R1.bed.hg18.uniq	31290	24163	0.227772
./GB941533_4lanes/TCTACTGT_readname.txt.R1.bed.hg18.uniq	9471	7504	0.207687
./GB941533_4lanes/TGATGCGA_readname.txt.R1.bed.hg18.uniq	8841	6888	0.220903
./GB941533_4lanes/TGCAGACA_readname.txt.R1.bed.hg18.uniq	4761	3839	0.193657
./GB941534_4lanes/AATGACAG_readname.txt.R1.bed.hg18.uniq	14104	10140	0.281055
./GB941534_4lanes/AGAGTTGT_readname.txt.R1.bed.hg18.uniq	80537	57911	0.280939
./GB941534_4lanes/ATCTGATG_readname.txt.R1.bed.hg18.uniq	164383	114868	0.301217
./GB941534_4lanes/ATTAAGCG_readname.txt.R1.bed.hg18.uniq	53382	38782	0.2735
./GB941534_4lanes/CAAGTCAC_readname.txt.R1.bed.hg18.uniq	129717	91628	0.293632
./GB941534_4lanes/CACAGTTG_readname.txt.R1.bed.hg18.uniq	1112	1011	0.0908273
./GB941534_4lanes/CAGTGATG_readname.txt.R1.bed.hg18.uniq	13920	9949	0.285273
./GB941534_4lanes/CATGTGTG_readname.txt.R1.bed.hg18.uniq	158615	111901	0.294512
./GB941534_4lanes/CGAGAATG_readname.txt.R1.bed.hg18.uniq	5261	3943	0.250523
./GB941534_4lanes/CTGACGTT_readname.txt.R1.bed.hg18.uniq	39219	27380	0.301869
./GB941534_4lanes/CTTCGTTG_readname.txt.R1.bed.hg18.uniq	1137	1038	0.0870712
./GB941534_4lanes/GACGTTAA_readname.txt.R1.bed.hg18.uniq	25319	17959	0.290691
./GB941534_4lanes/GATATTGT_readname.txt.R1.bed.hg18.uniq	18867	13508	0.284041
./GB941534_4lanes/TAACGTGT_readname.txt.R1.bed.hg18.uniq	24884	17280	0.305578
./GB941534_4lanes/TAAGGTGT_readname.txt.R1.bed.hg18.uniq	17183	12591	0.267241
./GB941534_4lanes/TACGCGTT_readname.txt.R1.bed.hg18.uniq	4682	3406	0.272533
./GB941534_4lanes/TCAAGTTG_readname.txt.R1.bed.hg18.uniq	25988	18861	0.274242
./GB941534_4lanes/TCATCGTG_readname.txt.R1.bed.hg18.uniq	62575	41565	0.335757
./GB941534_4lanes/TGGCGTAT_readname.txt.R1.bed.hg18.uniq	16528	11710	0.291505
./GB941534_4lanes/TTAAGCAT_readname.txt.R1.bed.hg18.uniq	70903	50294	0.290665
./GB941535_4lanes/AAGAATCT_readname.txt.R1.bed.hg18.uniq	6406	5061	0.209959
./GB941535_4lanes/AATCGGAT_readname.txt.R1.bed.hg18.uniq	50369	38587	0.233914
./GB941535_4lanes/AGAGTTGT_readname.txt.R1.bed.hg18.uniq	8452	6651	0.213086
./GB941535_4lanes/AGGCTTGA_readname.txt.R1.bed.hg18.uniq	14060	10723	0.23734
./GB941535_4lanes/ATCTGATG_readname.txt.R1.bed.hg18.uniq	130294	99433	0.236857
./GB941535_4lanes/ATGGACTG_readname.txt.R1.bed.hg18.uniq	17682	13446	0.239566
./GB941535_4lanes/ATGGCTGT_readname.txt.R1.bed.hg18.uniq	103697	78891	0.239216
./GB941535_4lanes/CATGGTGT_readname.txt.R1.bed.hg18.uniq	46731	35487	0.240611
./GB941535_4lanes/CGATTACA_readname.txt.R1.bed.hg18.uniq	7815	5840	0.252719
./GB941535_4lanes/CTGACGTT_readname.txt.R1.bed.hg18.uniq	3867	3068	0.20662
./GB941535_4lanes/CTTCGTTG_readname.txt.R1.bed.hg18.uniq	22198	16717	0.246914
./GB941535_4lanes/GATAACCA_readname.txt.R1.bed.hg18.uniq	7989	6332	0.20741
./GB941535_4lanes/GCGTAATT_readname.txt.R1.bed.hg18.uniq	10860	8316	0.234254
./GB941535_4lanes/GCTTAGTA_readname.txt.R1.bed.hg18.uniq	33295	25257	0.241418
./GB941535_4lanes/GGTCAATG_readname.txt.R1.bed.hg18.uniq	10781	8290	0.231055
./GB941535_4lanes/GTACCGAT_readname.txt.R1.bed.hg18.uniq	47242	35806	0.242073
./GB941535_4lanes/TAGACGGA_readname.txt.R1.bed.hg18.uniq	18531	14047	0.241973
./GB941535_4lanes/TAGCAGTT_readname.txt.R1.bed.hg18.uniq	50420	38068	0.244982
./GB941535_4lanes/TCGTTAGC_readname.txt.R1.bed.hg18.uniq	73780	56152	0.238927
./GB941535_4lanes/TCTACTGT_readname.txt.R1.bed.hg18.uniq	2230	1842	0.173991
./GB941535_4lanes/TCTGTTGT_readname.txt.R1.bed.hg18.uniq	126257	96504	0.235654
./GB941535_4lanes/TGGCGTAT_readname.txt.R1.bed.hg18.uniq	3645	2898	0.204938
./GB941535_4lanes/TTAAGCAT_readname.txt.R1.bed.hg18.uniq	103967	79195	0.238268
./GB941535_4lanes/TTCACGAT_readname.txt.R1.bed.hg18.uniq	66334	48193	0.27348
./GB941535_4lanes/TTCACTAG_readname.txt.R1.bed.hg18.uniq	1049	1000	0.0467112
./GB941536_4lanes/AACTGCCA_readname.txt.R1.bed.hg18.uniq	88808	63926	0.280177
./GB941536_4lanes/AAGAATCT_readname.txt.R1.bed.hg18.uniq	74556	52973	0.289487
./GB941536_4lanes/AATCGGAT_readname.txt.R1.bed.hg18.uniq	29245	21235	0.273893
./GB941536_4lanes/AATGACAG_readname.txt.R1.bed.hg18.uniq	15667	11607	0.259143
./GB941536_4lanes/ACACACGT_readname.txt.R1.bed.hg18.uniq	9303	6873	0.261206
./GB941536_4lanes/AGAGTTGT_readname.txt.R1.bed.hg18.uniq	1876	1759	0.0623667
./GB941536_4lanes/AGCAATCC_readname.txt.R1.bed.hg18.uniq	69517	50530	0.273127
./GB941536_4lanes/AGTTGACC_readname.txt.R1.bed.hg18.uniq	9612	7153	0.255826
./GB941536_4lanes/ATAGATAC_readname.txt.R1.bed.hg18.uniq	199144	143071	0.28157
./GB941536_4lanes/CAAGTCAC_readname.txt.R1.bed.hg18.uniq	29294	20744	0.291869
./GB941536_4lanes/CAGCTCTT_readname.txt.R1.bed.hg18.uniq	7696	5886	0.235187
./GB941536_4lanes/CATGTGTG_readname.txt.R1.bed.hg18.uniq	35628	25156	0.293926
./GB941536_4lanes/CTGCAATC_readname.txt.R1.bed.hg18.uniq	89474	65510	0.267832
./GB941536_4lanes/CTTCGTTG_readname.txt.R1.bed.hg18.uniq	204860	148584	0.274705
./GB941536_4lanes/GACTGTGT_readname.txt.R1.bed.hg18.uniq	7812	5882	0.247056
./GB941536_4lanes/GATATTGT_readname.txt.R1.bed.hg18.uniq	26475	19623	0.25881
./GB941536_4lanes/GCTTAGTA_readname.txt.R1.bed.hg18.uniq	41334	29737	0.280568
./GB941536_4lanes/GTCTCCTA_readname.txt.R1.bed.hg18.uniq	30851	22456	0.272114
./GB941536_4lanes/TAAGGTGT_readname.txt.R1.bed.hg18.uniq	26873	19741	0.265396
./GB941536_4lanes/TAGCAGTT_readname.txt.R1.bed.hg18.uniq	92864	67254	0.27578
./GB941536_4lanes/TCAAGTTG_readname.txt.R1.bed.hg18.uniq	75125	54427	0.275514
./GB941536_4lanes/TCCGGTAT_readname.txt.R1.bed.hg18.uniq	77889	55811	0.283455
./GB941536_4lanes/TGCAGACA_readname.txt.R1.bed.hg18.uniq	17007	14815	0.128888
./GB941536_4lanes/TGGCGTAT_readname.txt.R1.bed.hg18.uniq	45737	32911	0.280429
./GB941536_4lanes/TTCACGAT_readname.txt.R1.bed.hg18.uniq	169392	120309	0.28976
./GB941541_4lanes/AACTGCCA_readname.txt.R1.bed.hg18.uniq	4926	3973	0.193463
./GB941541_4lanes/ACTGCATG_readname.txt.R1.bed.hg18.uniq	3540	2860	0.19209
./GB941541_4lanes/AGAATCAG_readname.txt.R1.bed.hg18.uniq	20876	16503	0.209475
./GB941541_4lanes/AGTTGACC_readname.txt.R1.bed.hg18.uniq	65809	52351	0.204501
./GB941541_4lanes/ATATGCTG_readname.txt.R1.bed.hg18.uniq	160066	121625	0.240157
./GB941541_4lanes/CAATTCGT_readname.txt.R1.bed.hg18.uniq	26499	20890	0.211668
./GB941541_4lanes/CAGTGATG_readname.txt.R1.bed.hg18.uniq	87792	68968	0.214416
./GB941541_4lanes/CATAACTT_readname.txt.R1.bed.hg18.uniq	2707	2241	0.172146
./GB941541_4lanes/CATGGTGT_readname.txt.R1.bed.hg18.uniq	4763	3865	0.188537
./GB941541_4lanes/CATGTAGA_readname.txt.R1.bed.hg18.uniq	22820	18159	0.204251
./GB941541_4lanes/CCTCATGT_readname.txt.R1.bed.hg18.uniq	7443	5934	0.202741
./GB941541_4lanes/CGAACTAC_readname.txt.R1.bed.hg18.uniq	23688	18817	0.205632
./GB941541_4lanes/CTTCGTTG_readname.txt.R1.bed.hg18.uniq	41206	32719	0.205965
./GB941541_4lanes/GACGTTAA_readname.txt.R1.bed.hg18.uniq	50255	39327	0.217451
./GB941541_4lanes/GACTAAGA_readname.txt.R1.bed.hg18.uniq	8135	6568	0.192624
./GB941541_4lanes/GGAACTGT_readname.txt.R1.bed.hg18.uniq	15945	12712	0.202759
./GB941541_4lanes/GTCTCCTA_readname.txt.R1.bed.hg18.uniq	13853	10972	0.207969
./GB941541_4lanes/TAACCAAG_readname.txt.R1.bed.hg18.uniq	37409	29750	0.204737
./GB941541_4lanes/TCCGGTAT_readname.txt.R1.bed.hg18.uniq	9579	7701	0.196054
./GB941541_4lanes/TCCTGCTG_readname.txt.R1.bed.hg18.uniq	10593	8287	0.217691
./GB941541_4lanes/TCGTCGAT_readname.txt.R1.bed.hg18.uniq	2843	2253	0.207527
./GB941541_4lanes/TCTGTTGT_readname.txt.R1.bed.hg18.uniq	4231	3439	0.18719
./GB941541_4lanes/TGGACATG_readname.txt.R1.bed.hg18.uniq	7492	5994	0.199947
./GB941541_4lanes/TGGCGTAT_readname.txt.R1.bed.hg18.uniq	2833	2283	0.19414
./GB941541_4lanes/TTCACTAG_readname.txt.R1.bed.hg18.uniq	68762	54334	0.209825
./GB941544_4lanes/ACGTACTC_readname.txt.R1.bed.hg18.uniq	14909	10837	0.273124
./GB941544_4lanes/AGAATCAG_readname.txt.R1.bed.hg18.uniq	5131	3777	0.263886
./GB941544_4lanes/AGCAATCC_readname.txt.R1.bed.hg18.uniq	83940	57705	0.312545
./GB941544_4lanes/AGGTTGCT_readname.txt.R1.bed.hg18.uniq	18135	12890	0.28922
./GB941544_4lanes/ATACGACT_readname.txt.R1.bed.hg18.uniq	1517	1400	0.0771259
./GB941544_4lanes/ATATGCTG_readname.txt.R1.bed.hg18.uniq	6044	4442	0.265056
./GB941544_4lanes/ATGACTGT_readname.txt.R1.bed.hg18.uniq	125374	88642	0.292979
./GB941544_4lanes/ATTGGCGT_readname.txt.R1.bed.hg18.uniq	46273	32732	0.292633
./GB941544_4lanes/CAAGGTCA_readname.txt.R1.bed.hg18.uniq	77580	53906	0.305156
./GB941544_4lanes/CATGGTGT_readname.txt.R1.bed.hg18.uniq	16560	11906	0.281039
./GB941544_4lanes/CCTAGTAG_readname.txt.R1.bed.hg18.uniq	237977	164784	0.307563
./GB941544_4lanes/CGTAATTA_readname.txt.R1.bed.hg18.uniq	59734	46140	0.227576
./GB941544_4lanes/CTAGTGTG_readname.txt.R1.bed.hg18.uniq	7278	5324	0.26848
./GB941544_4lanes/GACGTTAA_readname.txt.R1.bed.hg18.uniq	7069	5080	0.281369
./GB941544_4lanes/GAGCGATA_readname.txt.R1.bed.hg18.uniq	7566	5526	0.269627
./GB941544_4lanes/GATAACCA_readname.txt.R1.bed.hg18.uniq	3976	3089	0.223089
./GB941544_4lanes/GTCTCCTA_readname.txt.R1.bed.hg18.uniq	11415	8319	0.271222
./GB941544_4lanes/GTGAACGT_readname.txt.R1.bed.hg18.uniq	5031	3672	0.270125
./GB941544_4lanes/GTTATATC_readname.txt.R1.bed.hg18.uniq	168289	121361	0.278854
./GB941544_4lanes/TAACCAAG_readname.txt.R1.bed.hg18.uniq	10982	7857	0.284557
./GB941544_4lanes/TACACTGT_readname.txt.R1.bed.hg18.uniq	32768	23425	0.285126
./GB941544_4lanes/TACGCGTT_readname.txt.R1.bed.hg18.uniq	72257	50345	0.303251
./GB941544_4lanes/TCAGCTTG_readname.txt.R1.bed.hg18.uniq	4835	3516	0.272802
./GB941544_4lanes/TCCTGCTG_readname.txt.R1.bed.hg18.uniq	32191	22864	0.289739
./GB941544_4lanes/TCTGTTGT_readname.txt.R1.bed.hg18.uniq	9445	6885	0.271043
./GB941549_4lanes/ACTGCATG_readname.txt.R1.bed.hg18.uniq	41778	30333	0.273948
./GB941549_4lanes/AGCAATCC_readname.txt.R1.bed.hg18.uniq	46308	33857	0.268874
./GB941549_4lanes/AGGCTTGA_readname.txt.R1.bed.hg18.uniq	13739	10149	0.2613
./GB941549_4lanes/AGGTTGCT_readname.txt.R1.bed.hg18.uniq	66095	48475	0.266586
./GB941549_4lanes/ATACGACT_readname.txt.R1.bed.hg18.uniq	124107	90885	0.267688
./GB941549_4lanes/ATAGATAC_readname.txt.R1.bed.hg18.uniq	32880	24406	0.257725
./GB941549_4lanes/CAAGGTCA_readname.txt.R1.bed.hg18.uniq	10996	8103	0.263096
./GB941549_4lanes/CACTCTTG_readname.txt.R1.bed.hg18.uniq	160590	116475	0.274706
./GB941549_4lanes/CAGCTCTT_readname.txt.R1.bed.hg18.uniq	5535	4190	0.242999
./GB941549_4lanes/CATAACTT_readname.txt.R1.bed.hg18.uniq	39535	29060	0.264955
./GB941549_4lanes/CATATGCT_readname.txt.R1.bed.hg18.uniq	34531	26562	0.230778
./GB941549_4lanes/CATGTAGA_readname.txt.R1.bed.hg18.uniq	8901	6481	0.27188
./GB941549_4lanes/CTGCAATC_readname.txt.R1.bed.hg18.uniq	29451	21864	0.257614
./GB941549_4lanes/CTTCGTTG_readname.txt.R1.bed.hg18.uniq	1167	1092	0.0642674
./GB941549_4lanes/GAGCGATA_readname.txt.R1.bed.hg18.uniq	45816	32751	0.285162
./GB941549_4lanes/GATAACCA_readname.txt.R1.bed.hg18.uniq	8132	6125	0.246803
./GB941549_4lanes/GTACCGAT_readname.txt.R1.bed.hg18.uniq	79877	56980	0.286653
./GB941549_4lanes/TAACGTGT_readname.txt.R1.bed.hg18.uniq	46169	33115	0.282744
./GB941549_4lanes/TACACTGT_readname.txt.R1.bed.hg18.uniq	107368	76569	0.286855
./GB941549_4lanes/TCATCGTG_readname.txt.R1.bed.hg18.uniq	14200	10402	0.267465
./GB941549_4lanes/TCGATTAA_readname.txt.R1.bed.hg18.uniq	102021	74684	0.267955
./GB941549_4lanes/TCGTCGAT_readname.txt.R1.bed.hg18.uniq	27111	18948	0.301095
./GB941549_4lanes/TCTACTGT_readname.txt.R1.bed.hg18.uniq	13051	9573	0.266493
./GB941549_4lanes/TCTGTTGT_readname.txt.R1.bed.hg18.uniq	6555	4968	0.242105
./GB941549_4lanes/TGCAGACA_readname.txt.R1.bed.hg18.uniq	12118	8892	0.266216
./GB941550_4lanes/AGCAATCC_readname.txt.R1.bed.hg18.uniq	83518	59142	0.291865
./GB941550_4lanes/AGGTTGCT_readname.txt.R1.bed.hg18.uniq	44571	31237	0.299163
./GB941550_4lanes/AGTTGACC_readname.txt.R1.bed.hg18.uniq	4245	3158	0.256066
./GB941550_4lanes/ATACGACT_readname.txt.R1.bed.hg18.uniq	61911	44422	0.282486
./GB941550_4lanes/ATTGGCGT_readname.txt.R1.bed.hg18.uniq	4237	3071	0.275195
./GB941550_4lanes/CAAGGTCA_readname.txt.R1.bed.hg18.uniq	1400	1170	0.164286
./GB941550_4lanes/CACAGTTG_readname.txt.R1.bed.hg18.uniq	76641	53257	0.305111
./GB941550_4lanes/CATAACTT_readname.txt.R1.bed.hg18.uniq	5216	3840	0.263804
./GB941550_4lanes/CATATGCT_readname.txt.R1.bed.hg18.uniq	34942	26023	0.255252
./GB941550_4lanes/CATGTGTG_readname.txt.R1.bed.hg18.uniq	6173	4314	0.30115
./GB941550_4lanes/CGAACTAC_readname.txt.R1.bed.hg18.uniq	5394	3945	0.268632
./GB941550_4lanes/CGATTACA_readname.txt.R1.bed.hg18.uniq	3691	2738	0.258196
./GB941550_4lanes/GACTAAGA_readname.txt.R1.bed.hg18.uniq	40687	28839	0.291199
./GB941550_4lanes/GACTGTGT_readname.txt.R1.bed.hg18.uniq	30223	21142	0.300467
./GB941550_4lanes/GATAACCA_readname.txt.R1.bed.hg18.uniq	38554	27671	0.282279
./GB941550_4lanes/GATATTGT_readname.txt.R1.bed.hg18.uniq	37963	26994	0.288939
./GB941550_4lanes/GTGAACGT_readname.txt.R1.bed.hg18.uniq	6327	4608	0.271693
./GB941550_4lanes/TAAGGTGT_readname.txt.R1.bed.hg18.uniq	164884	117053	0.290089
./GB941550_4lanes/TAGCAGTT_readname.txt.R1.bed.hg18.uniq	84150	58839	0.300784
./GB941550_4lanes/TCCGGTAT_readname.txt.R1.bed.hg18.uniq	5211	3829	0.265208
./GB941550_4lanes/TCCTGCTG_readname.txt.R1.bed.hg18.uniq	13587	9647	0.289983
./GB941550_4lanes/TCGATTAA_readname.txt.R1.bed.hg18.uniq	7117	5193	0.270339
./GB941550_4lanes/TCGTCGAT_readname.txt.R1.bed.hg18.uniq	5509	3966	0.280087
./GB941550_4lanes/TGGCGTAT_readname.txt.R1.bed.hg18.uniq	24202	17275	0.286216
./GB941550_4lanes/TTCACTAG_readname.txt.R1.bed.hg18.uniq	12623	8800	0.30286
./GB941551_4lanes/AGCAATCC_readname.txt.R1.bed.hg18.uniq	12743	9548	0.250726
./GB941551_4lanes/AGTTGACC_readname.txt.R1.bed.hg18.uniq	7974	6093	0.235892
./GB941551_4lanes/ATACGACT_readname.txt.R1.bed.hg18.uniq	143414	107171	0.252716
./GB941551_4lanes/ATATGCTG_readname.txt.R1.bed.hg18.uniq	22042	16320	0.259595
./GB941551_4lanes/CAAGATAT_readname.txt.R1.bed.hg18.uniq	5827	4520	0.224301
./GB941551_4lanes/CAAGTCAC_readname.txt.R1.bed.hg18.uniq	90448	68016	0.24801
./GB941551_4lanes/CAATGTGT_readname.txt.R1.bed.hg18.uniq	140725	105107	0.253104
./GB941551_4lanes/CACAGTTG_readname.txt.R1.bed.hg18.uniq	53825	40592	0.245852
./GB941551_4lanes/CAGCTCTT_readname.txt.R1.bed.hg18.uniq	70830	53064	0.250826
./GB941551_4lanes/CGTAATTA_readname.txt.R1.bed.hg18.uniq	24752	19743	0.202367
./GB941551_4lanes/CTCTGATT_readname.txt.R1.bed.hg18.uniq	51692	39289	0.23994
./GB941551_4lanes/CTGACGTT_readname.txt.R1.bed.hg18.uniq	20296	15462	0.238175
./GB941551_4lanes/CTGCAATC_readname.txt.R1.bed.hg18.uniq	25909	19578	0.244355
./GB941551_4lanes/CTTCGTTG_readname.txt.R1.bed.hg18.uniq	15380	11802	0.23264
./GB941551_4lanes/GACGTTAA_readname.txt.R1.bed.hg18.uniq	35620	26569	0.254099
./GB941551_4lanes/GAGACCTT_readname.txt.R1.bed.hg18.uniq	160639	119768	0.254428
./GB941551_4lanes/GATATTGT_readname.txt.R1.bed.hg18.uniq	46919	34795	0.258403
./GB941551_4lanes/GGTCAATG_readname.txt.R1.bed.hg18.uniq	23156	17632	0.238556
./GB941551_4lanes/TAACCAAG_readname.txt.R1.bed.hg18.uniq	73025	54173	0.258158
./GB941551_4lanes/TAGTTCTG_readname.txt.R1.bed.hg18.uniq	5427	4239	0.218905
./GB941551_4lanes/TCCGGTAT_readname.txt.R1.bed.hg18.uniq	36438	27399	0.248065
./GB941551_4lanes/TCTACTGT_readname.txt.R1.bed.hg18.uniq	46408	34435	0.257994
./GB941551_4lanes/TGGACATG_readname.txt.R1.bed.hg18.uniq	4524	3506	0.225022
./GB941551_4lanes/TTCACGAT_readname.txt.R1.bed.hg18.uniq	162161	121864	0.2485
./GB941552_4lanes/AACTGCCA_readname.txt.R1.bed.hg18.uniq	119567	86200	0.279065
./GB941552_4lanes/AATGACAG_readname.txt.R1.bed.hg18.uniq	108346	78565	0.274869
./GB941552_4lanes/ACGTACGT_readname.txt.R1.bed.hg18.uniq	105156	75823	0.278947
./GB941552_4lanes/ACGTACTC_readname.txt.R1.bed.hg18.uniq	1291	1042	0.192874
./GB941552_4lanes/AGAGTTGT_readname.txt.R1.bed.hg18.uniq	1279	1207	0.056294
./GB941552_4lanes/ATCTGATG_readname.txt.R1.bed.hg18.uniq	45310	33173	0.267866
./GB941552_4lanes/ATGACACC_readname.txt.R1.bed.hg18.uniq	439044	298845	0.319328
./GB941552_4lanes/ATGGCTGT_readname.txt.R1.bed.hg18.uniq	12764	9316	0.270135
./GB941552_4lanes/ATTAAGCG_readname.txt.R1.bed.hg18.uniq	31022	22793	0.265263
./GB941552_4lanes/CACTCTTG_readname.txt.R1.bed.hg18.uniq	35152	25792	0.266272
./GB941552_4lanes/CAGCTCTT_readname.txt.R1.bed.hg18.uniq	9625	7268	0.244883
./GB941552_4lanes/CATGTATT_readname.txt.R1.bed.hg18.uniq	7205	5377	0.253713
./GB941552_4lanes/CTTCGTTG_readname.txt.R1.bed.hg18.uniq	366717	251658	0.313754
./GB941552_4lanes/GGATCATC_readname.txt.R1.bed.hg18.uniq	9327	6973	0.252386
./GB941552_4lanes/GGTCAATG_readname.txt.R1.bed.hg18.uniq	8630	6490	0.247972
./GB941552_4lanes/TACGCGTT_readname.txt.R1.bed.hg18.uniq	13065	9765	0.252583
./GB941552_4lanes/TAGCAGTT_readname.txt.R1.bed.hg18.uniq	34350	25422	0.259913
./GB941552_4lanes/TCAGCTTG_readname.txt.R1.bed.hg18.uniq	46915	34851	0.257146
./GB941552_4lanes/TCCTGCTG_readname.txt.R1.bed.hg18.uniq	38575	27794	0.279482
./GB941552_4lanes/TCGTCGAT_readname.txt.R1.bed.hg18.uniq	8620	6215	0.279002
./GB941552_4lanes/TCGTTAGC_readname.txt.R1.bed.hg18.uniq	18124	13274	0.267601
./GB941553_4lanes/AATGACAG_readname.txt.R1.bed.hg18.uniq	49962	35213	0.295204
./GB941553_4lanes/ACTGCATG_readname.txt.R1.bed.hg18.uniq	9968	7108	0.286918
./GB941553_4lanes/AGAGTTGT_readname.txt.R1.bed.hg18.uniq	46386	33059	0.287307
./GB941553_4lanes/ATAGATAC_readname.txt.R1.bed.hg18.uniq	9309	6913	0.257385
./GB941553_4lanes/ATCTGATG_readname.txt.R1.bed.hg18.uniq	11081	8079	0.270914
./GB941553_4lanes/ATGACACC_readname.txt.R1.bed.hg18.uniq	82741	58590	0.291887
./GB941553_4lanes/ATGACTGT_readname.txt.R1.bed.hg18.uniq	25550	17844	0.301605
./GB941553_4lanes/ATGGCTGT_readname.txt.R1.bed.hg18.uniq	140646	99163	0.294946
./GB941553_4lanes/CAAGGTCA_readname.txt.R1.bed.hg18.uniq	8668	6251	0.278842
./GB941553_4lanes/CAATGTGT_readname.txt.R1.bed.hg18.uniq	51402	35864	0.302284
./GB941553_4lanes/CTAAGTGT_readname.txt.R1.bed.hg18.uniq	70297	50496	0.281676
./GB941553_4lanes/CTCTGATT_readname.txt.R1.bed.hg18.uniq	6153	4508	0.267349
./GB941553_4lanes/GATAACCA_readname.txt.R1.bed.hg18.uniq	11812	8579	0.273705
./GB941553_4lanes/GATATTGT_readname.txt.R1.bed.hg18.uniq	79347	56546	0.287358
./GB941553_4lanes/GCGTAATT_readname.txt.R1.bed.hg18.uniq	33042	23485	0.289238
./GB941553_4lanes/GGTCAATG_readname.txt.R1.bed.hg18.uniq	48638	34388	0.292981
./GB941553_4lanes/GTACCGAT_readname.txt.R1.bed.hg18.uniq	6931	4999	0.278748
./GB941553_4lanes/GTCTCCTA_readname.txt.R1.bed.hg18.uniq	17633	12763	0.276187
./GB941553_4lanes/TAACCAAG_readname.txt.R1.bed.hg18.uniq	25974	18329	0.294333
./GB941553_4lanes/TACACTGT_readname.txt.R1.bed.hg18.uniq	9727	6993	0.281073
./GB941553_4lanes/TAGCAGTT_readname.txt.R1.bed.hg18.uniq	44849	32030	0.285826
./GB941553_4lanes/TCATCGTG_readname.txt.R1.bed.hg18.uniq	14382	10191	0.291406
./GB941553_4lanes/TGAGCGAA_readname.txt.R1.bed.hg18.uniq	9850	7049	0.284365
./GB941553_4lanes/TGGACATG_readname.txt.R1.bed.hg18.uniq	6337	4585	0.276472
./GB941553_4lanes/TTCACTAG_readname.txt.R1.bed.hg18.uniq	12730	9159	0.280518
./GB941554_4lanes/AAGAGGTT_readname.txt.R1.bed.hg18.uniq	5836	4591	0.213331
./GB941554_4lanes/AATCGGAT_readname.txt.R1.bed.hg18.uniq	3499	2830	0.191197
./GB941554_4lanes/ACGTACTC_readname.txt.R1.bed.hg18.uniq	3399	2713	0.201824
./GB941554_4lanes/ACTGCATG_readname.txt.R1.bed.hg18.uniq	9497	7443	0.216279
./GB941554_4lanes/AGGCTTGA_readname.txt.R1.bed.hg18.uniq	4812	3643	0.242934
./GB941554_4lanes/AGGTTGCT_readname.txt.R1.bed.hg18.uniq	2815	2301	0.182593
./GB941554_4lanes/ATATGCTG_readname.txt.R1.bed.hg18.uniq	26713	20979	0.214652
./GB941554_4lanes/ATCTGATG_readname.txt.R1.bed.hg18.uniq	15645	12298	0.213934
./GB941554_4lanes/ATTAAGCG_readname.txt.R1.bed.hg18.uniq	3578	2902	0.188932
./GB941554_4lanes/ATTGGCGT_readname.txt.R1.bed.hg18.uniq	25415	20046	0.211253
./GB941554_4lanes/CAATTCGT_readname.txt.R1.bed.hg18.uniq	20015	15603	0.220435
./GB941554_4lanes/CAGTGATG_readname.txt.R1.bed.hg18.uniq	19861	15705	0.209254
./GB941554_4lanes/CATGGTGT_readname.txt.R1.bed.hg18.uniq	69040	54159	0.215542
./GB941554_4lanes/CATGTAGA_readname.txt.R1.bed.hg18.uniq	45272	35508	0.215674
./GB941554_4lanes/CGAGAATG_readname.txt.R1.bed.hg18.uniq	37293	29146	0.218459
./GB941554_4lanes/CTAAGTGT_readname.txt.R1.bed.hg18.uniq	6600	5282	0.199697
./GB941554_4lanes/CTAGTGTG_readname.txt.R1.bed.hg18.uniq	2849	2300	0.192699
./GB941554_4lanes/GACGTTAA_readname.txt.R1.bed.hg18.uniq	14808	11522	0.221907
./GB941554_4lanes/GATAACCA_readname.txt.R1.bed.hg18.uniq	78131	60779	0.222089
./GB941554_4lanes/GCGTAATT_readname.txt.R1.bed.hg18.uniq	14296	11434	0.200196
./GB941554_4lanes/GGAACTGT_readname.txt.R1.bed.hg18.uniq	1674	1327	0.207288
./GB941554_4lanes/TCAGCTTG_readname.txt.R1.bed.hg18.uniq	13912	11075	0.203925
./GB941554_4lanes/TCCGGTAT_readname.txt.R1.bed.hg18.uniq	3971	3157	0.204986
./GB941554_4lanes/TCGATTAA_readname.txt.R1.bed.hg18.uniq	3787	3020	0.202535
./GB941554_4lanes/TTCACGAT_readname.txt.R1.bed.hg18.uniq	7361	5757	0.217905
./GB941555_4lanes/AACTGCCA_readname.txt.R1.bed.hg18.uniq	12896	9124	0.292494
./GB941555_4lanes/AAGAGGTT_readname.txt.R1.bed.hg18.uniq	11603	8397	0.276308
./GB941555_4lanes/ACGTACTC_readname.txt.R1.bed.hg18.uniq	18380	13076	0.288575
./GB941555_4lanes/AGAGTTGT_readname.txt.R1.bed.hg18.uniq	140566	98994	0.295747
./GB941555_4lanes/AGCAATCC_readname.txt.R1.bed.hg18.uniq	45041	32007	0.289381
./GB941555_4lanes/ATAGATAC_readname.txt.R1.bed.hg18.uniq	2907	2266	0.220502
./GB941555_4lanes/ATCTGATG_readname.txt.R1.bed.hg18.uniq	150075	105720	0.295552
./GB941555_4lanes/CAAGGTCA_readname.txt.R1.bed.hg18.uniq	32230	22622	0.298107
./GB941555_4lanes/CAATGTGT_readname.txt.R1.bed.hg18.uniq	85724	60249	0.297175
./GB941555_4lanes/CACAGTTG_readname.txt.R1.bed.hg18.uniq	6781	5061	0.25365
./GB941555_4lanes/CATGTATT_readname.txt.R1.bed.hg18.uniq	59212	41020	0.307235
./GB941555_4lanes/CGATTACA_readname.txt.R1.bed.hg18.uniq	32073	22798	0.289184
./GB941555_4lanes/CTTCGTTG_readname.txt.R1.bed.hg18.uniq	1244	1159	0.068328
./GB941555_4lanes/GAGACCTT_readname.txt.R1.bed.hg18.uniq	14459	10442	0.27782
./GB941555_4lanes/GGAACTGT_readname.txt.R1.bed.hg18.uniq	25445	18120	0.287876
./GB941555_4lanes/GTGAACGT_readname.txt.R1.bed.hg18.uniq	3029	2218	0.267745
./GB941555_4lanes/TAACCAAG_readname.txt.R1.bed.hg18.uniq	27427	19615	0.284829
./GB941555_4lanes/TACACTGT_readname.txt.R1.bed.hg18.uniq	3665	2770	0.244202
./GB941555_4lanes/TCATCGTG_readname.txt.R1.bed.hg18.uniq	59716	42000	0.296671
./GB941555_4lanes/TCCGGTAT_readname.txt.R1.bed.hg18.uniq	5214	3866	0.258535
./GB941555_4lanes/TCGTCGAT_readname.txt.R1.bed.hg18.uniq	3887	2842	0.268845
./GB941555_4lanes/TGGACATG_readname.txt.R1.bed.hg18.uniq	12074	8410	0.303462
./GB941555_4lanes/TGGCGTAT_readname.txt.R1.bed.hg18.uniq	32232	23021	0.285772
./GB941555_4lanes/TTAAGCAT_readname.txt.R1.bed.hg18.uniq	14720	10736	0.270652
./GB941555_4lanes/TTCACTAG_readname.txt.R1.bed.hg18.uniq	7159	5382	0.248219
./GB941556_4lanes/AATGACAG_readname.txt.R1.bed.hg18.uniq	3188	2592	0.186951
./GB941556_4lanes/ACGTACGT_readname.txt.R1.bed.hg18.uniq	29308	20682	0.294322
./GB941556_4lanes/AGAATCAG_readname.txt.R1.bed.hg18.uniq	8946	6337	0.291639
./GB941556_4lanes/AGAGTTGT_readname.txt.R1.bed.hg18.uniq	1361	1313	0.0352682
./GB941556_4lanes/AGTTGACC_readname.txt.R1.bed.hg18.uniq	131950	94493	0.283873
./GB941556_4lanes/ATCTGATG_readname.txt.R1.bed.hg18.uniq	11093	8074	0.272154
./GB941556_4lanes/ATGGACTG_readname.txt.R1.bed.hg18.uniq	1654	1609	0.0272068
./GB941556_4lanes/CACAGTTG_readname.txt.R1.bed.hg18.uniq	55836	39867	0.285998
./GB941556_4lanes/CATAACTT_readname.txt.R1.bed.hg18.uniq	4790	3587	0.251148
./GB941556_4lanes/CATATGCT_readname.txt.R1.bed.hg18.uniq	131473	101402	0.228724
./GB941556_4lanes/CGAGAATG_readname.txt.R1.bed.hg18.uniq	54085	38678	0.284866
./GB941556_4lanes/CGTAATTA_readname.txt.R1.bed.hg18.uniq	4238	3379	0.20269
./GB941556_4lanes/CTAGTGTG_readname.txt.R1.bed.hg18.uniq	61434	43726	0.288244
./GB941556_4lanes/CTTCGTTG_readname.txt.R1.bed.hg18.uniq	237575	169561	0.286284
./GB941556_4lanes/GACTGTGT_readname.txt.R1.bed.hg18.uniq	83707	59396	0.29043
./GB941556_4lanes/GATAACCA_readname.txt.R1.bed.hg18.uniq	6406	4801	0.250546
./GB941556_4lanes/GGAACTGT_readname.txt.R1.bed.hg18.uniq	1699	1433	0.156563
./GB941556_4lanes/GGATCATC_readname.txt.R1.bed.hg18.uniq	32619	23536	0.278457
./GB941556_4lanes/GGTCAATG_readname.txt.R1.bed.hg18.uniq	12678	8490	0.330336
./GB941556_4lanes/TCAGCTTG_readname.txt.R1.bed.hg18.uniq	6353	4804	0.243822
./GB941556_4lanes/TCGATTAA_readname.txt.R1.bed.hg18.uniq	37831	27508	0.272871
./GB941556_4lanes/TCTGTTGT_readname.txt.R1.bed.hg18.uniq	22072	15870	0.280989
./GB941556_4lanes/TGGCGTAT_readname.txt.R1.bed.hg18.uniq	5755	4357	0.242919
./GB941556_4lanes/TTAAGCAT_readname.txt.R1.bed.hg18.uniq	44889	32219	0.282252
./GB941556_4lanes/TTCACTAG_readname.txt.R1.bed.hg18.uniq	102689	74465	0.274849
./GB941557_4lanes/ACGTACTC_readname.txt.R1.bed.hg18.uniq	16947	12395	0.268602
./GB941557_4lanes/ATAGATAC_readname.txt.R1.bed.hg18.uniq	8463	6541	0.227106
./GB941557_4lanes/CAAGTCAC_readname.txt.R1.bed.hg18.uniq	9387	7024	0.251731
./GB941557_4lanes/CAATGTGT_readname.txt.R1.bed.hg18.uniq	4282	3252	0.240542
./GB941557_4lanes/CGAACTAC_readname.txt.R1.bed.hg18.uniq	25951	19102	0.26392
./GB941557_4lanes/CGATTACA_readname.txt.R1.bed.hg18.uniq	60475	44475	0.264572
./GB941557_4lanes/CTGCAATC_readname.txt.R1.bed.hg18.uniq	9366	7187	0.23265
./GB941557_4lanes/CTTCGTTG_readname.txt.R1.bed.hg18.uniq	122493	89825	0.266693
./GB941557_4lanes/GACTAAGA_readname.txt.R1.bed.hg18.uniq	2989	2339	0.217464
./GB941557_4lanes/GATATTGT_readname.txt.R1.bed.hg18.uniq	79089	58684	0.258
./GB941557_4lanes/GCTTAGTA_readname.txt.R1.bed.hg18.uniq	46288	34266	0.259722
./GB941557_4lanes/GGAACTGT_readname.txt.R1.bed.hg18.uniq	6095	4715	0.226415
./GB941557_4lanes/GTCTCCTA_readname.txt.R1.bed.hg18.uniq	75627	56039	0.259008
./GB941557_4lanes/GTTATATC_readname.txt.R1.bed.hg18.uniq	59418	44650	0.248544
./GB941557_4lanes/TACAGTGT_readname.txt.R1.bed.hg18.uniq	32514	23987	0.262256
./GB941557_4lanes/TCGTTAGC_readname.txt.R1.bed.hg18.uniq	6743	5099	0.243808
./GB941557_4lanes/TGATGCGA_readname.txt.R1.bed.hg18.uniq	77056	55842	0.275306
./GB941557_4lanes/TTCACGAT_readname.txt.R1.bed.hg18.uniq	35379	26285	0.257045
./GB941558_4lanes/AAGAGGTT_readname.txt.R1.bed.hg18.uniq	41232	29971	0.273113
./GB941558_4lanes/ACACACGT_readname.txt.R1.bed.hg18.uniq	2359	1793	0.239932
./GB941558_4lanes/AGAGTTGT_readname.txt.R1.bed.hg18.uniq	12021	8915	0.258381
./GB941558_4lanes/AGCAATCC_readname.txt.R1.bed.hg18.uniq	7690	5732	0.254616
./GB941558_4lanes/AGGTTGCT_readname.txt.R1.bed.hg18.uniq	63163	45405	0.281146
./GB941558_4lanes/ATAGATAC_readname.txt.R1.bed.hg18.uniq	39914	28607	0.283284
./GB941558_4lanes/ATATGCTG_readname.txt.R1.bed.hg18.uniq	15000	10809	0.2794
./GB941558_4lanes/CAAGGTCA_readname.txt.R1.bed.hg18.uniq	40388	29614	0.266762
./GB941558_4lanes/CAATTCGT_readname.txt.R1.bed.hg18.uniq	46372	33350	0.280816
./GB941558_4lanes/CACAGTTG_readname.txt.R1.bed.hg18.uniq	45331	32654	0.279654
./GB941558_4lanes/CAGCTCTT_readname.txt.R1.bed.hg18.uniq	55916	39883	0.286734
./GB941558_4lanes/CATAACTT_readname.txt.R1.bed.hg18.uniq	141770	102507	0.276949
./GB941558_4lanes/CATATGCT_readname.txt.R1.bed.hg18.uniq	5753	4364	0.241439
./GB941558_4lanes/CCTAGTAG_readname.txt.R1.bed.hg18.uniq	15275	11232	0.264681
./GB941558_4lanes/CGATTACA_readname.txt.R1.bed.hg18.uniq	7179	5279	0.264661
./GB941558_4lanes/CTGACGTT_readname.txt.R1.bed.hg18.uniq	4799	3651	0.239217
./GB941558_4lanes/GACGTTAA_readname.txt.R1.bed.hg18.uniq	12245	8850	0.277256
./GB941558_4lanes/GAGCGATA_readname.txt.R1.bed.hg18.uniq	33789	24032	0.288763
./GB941558_4lanes/GATAACCA_readname.txt.R1.bed.hg18.uniq	130294	91780	0.295593
./GB941558_4lanes/GATATTGT_readname.txt.R1.bed.hg18.uniq	6927	5151	0.256388
./GB941558_4lanes/GTCTCCTA_readname.txt.R1.bed.hg18.uniq	94293	67546	0.283658
./GB941558_4lanes/TAACGTGT_readname.txt.R1.bed.hg18.uniq	46283	32665	0.294233
./GB941558_4lanes/TCCGGTAT_readname.txt.R1.bed.hg18.uniq	7859	5790	0.263265
./GB941558_4lanes/TCGTCGAT_readname.txt.R1.bed.hg18.uniq	7260	5268	0.27438
./GB941558_4lanes/TCGTTAGC_readname.txt.R1.bed.hg18.uniq	49053	34920	0.288117
./GB941559_4lanes/AACTGCCA_readname.txt.R1.bed.hg18.uniq	111918	80821	0.277855
./GB941559_4lanes/AAGAATCT_readname.txt.R1.bed.hg18.uniq	143116	104438	0.270256
./GB941559_4lanes/AGAGTTGT_readname.txt.R1.bed.hg18.uniq	24116	18012	0.25311
./GB941559_4lanes/AGGCTTGA_readname.txt.R1.bed.hg18.uniq	77700	56183	0.276924
./GB941559_4lanes/ATACGACT_readname.txt.R1.bed.hg18.uniq	7442	5583	0.249798
./GB941559_4lanes/ATGGACTG_readname.txt.R1.bed.hg18.uniq	53838	38741	0.280415
./GB941559_4lanes/CAAGATAT_readname.txt.R1.bed.hg18.uniq	4223	3247	0.231115
./GB941559_4lanes/CATGGTGT_readname.txt.R1.bed.hg18.uniq	2969	2489	0.161671
./GB941559_4lanes/CCTAGTAG_readname.txt.R1.bed.hg18.uniq	38422	28244	0.2649
./GB941559_4lanes/CGAACTAC_readname.txt.R1.bed.hg18.uniq	27311	20007	0.267438
./GB941559_4lanes/CTTCGTTG_readname.txt.R1.bed.hg18.uniq	11929	8895	0.254338
./GB941559_4lanes/GACGTTAA_readname.txt.R1.bed.hg18.uniq	13074	9554	0.269237
./GB941559_4lanes/GACTAAGA_readname.txt.R1.bed.hg18.uniq	16048	11778	0.266077
./GB941559_4lanes/GATAACCA_readname.txt.R1.bed.hg18.uniq	56207	40962	0.27123
./GB941559_4lanes/GTTATATC_readname.txt.R1.bed.hg18.uniq	2717	2126	0.217519
./GB941559_4lanes/TAACGTGT_readname.txt.R1.bed.hg18.uniq	42183	30620	0.274115
./GB941559_4lanes/TAGACGGA_readname.txt.R1.bed.hg18.uniq	31467	22926	0.271427
./GB941559_4lanes/TGGCGTAT_readname.txt.R1.bed.hg18.uniq	79300	57682	0.27261
./GB941559_4lanes/TTCACTAG_readname.txt.R1.bed.hg18.uniq	77421	56950	0.264411
./GB941560_4lanes/AACTGCCA_readname.txt.R1.bed.hg18.uniq	60541	44736	0.261063
./GB941560_4lanes/AATGACAG_readname.txt.R1.bed.hg18.uniq	12823	9672	0.24573
./GB941560_4lanes/ACGTACGT_readname.txt.R1.bed.hg18.uniq	40091	29752	0.257888
./GB941560_4lanes/ACTGCATG_readname.txt.R1.bed.hg18.uniq	42097	31174	0.259472
./GB941560_4lanes/AGAATCAG_readname.txt.R1.bed.hg18.uniq	22389	16601	0.25852
./GB941560_4lanes/AGGCTTGA_readname.txt.R1.bed.hg18.uniq	42951	32009	0.254755
./GB941560_4lanes/AGGTTGCT_readname.txt.R1.bed.hg18.uniq	24732	18486	0.252547
./GB941560_4lanes/ATGGCTGT_readname.txt.R1.bed.hg18.uniq	20345	15258	0.250037
./GB941560_4lanes/CAAGATAT_readname.txt.R1.bed.hg18.uniq	16023	11897	0.257505
./GB941560_4lanes/CAAGTCAC_readname.txt.R1.bed.hg18.uniq	22065	16632	0.246227
./GB941560_4lanes/CAGCTCTT_readname.txt.R1.bed.hg18.uniq	74512	56208	0.245652
./GB941560_4lanes/CATAACTT_readname.txt.R1.bed.hg18.uniq	35867	26748	0.254245
./GB941560_4lanes/CCTAGTAG_readname.txt.R1.bed.hg18.uniq	43763	33002	0.245893
./GB941560_4lanes/CTCTGATT_readname.txt.R1.bed.hg18.uniq	12891	9857	0.235358
./GB941560_4lanes/CTGCAATC_readname.txt.R1.bed.hg18.uniq	35016	26211	0.251456
./GB941560_4lanes/CTTCGTTG_readname.txt.R1.bed.hg18.uniq	16463	12306	0.252506
./GB941560_4lanes/GATATTGT_readname.txt.R1.bed.hg18.uniq	181849	135914	0.2526
./GB941560_4lanes/GTACCGAT_readname.txt.R1.bed.hg18.uniq	33659	24822	0.262545
./GB941560_4lanes/TAAGGTGT_readname.txt.R1.bed.hg18.uniq	79513	58679	0.26202
./GB941560_4lanes/TACGCGTT_readname.txt.R1.bed.hg18.uniq	30763	23011	0.251991
./GB941560_4lanes/TAGCAGTT_readname.txt.R1.bed.hg18.uniq	28606	20696	0.276515
./GB941560_4lanes/TGCAGACA_readname.txt.R1.bed.hg18.uniq	11879	9047	0.238404
./GB941560_4lanes/TGGCGTAT_readname.txt.R1.bed.hg18.uniq	23646	17367	0.265542
./GB941560_4lanes/TTCACGAT_readname.txt.R1.bed.hg18.uniq	60052	44697	0.255695
./GB941560_4lanes/TTCACTAG_readname.txt.R1.bed.hg18.uniq	83336	62324	0.252136
./GB941561_4lanes/AATCGGAT_readname.txt.R1.bed.hg18.uniq	11314	8398	0.257734
./GB941561_4lanes/ACGTACTC_readname.txt.R1.bed.hg18.uniq	43535	31416	0.278374
./GB941561_4lanes/AGAGTTGT_readname.txt.R1.bed.hg18.uniq	63852	47086	0.262576
./GB941561_4lanes/ATAGATAC_readname.txt.R1.bed.hg18.uniq	6419	4916	0.234149
./GB941561_4lanes/ATTGGCGT_readname.txt.R1.bed.hg18.uniq	38038	27596	0.274515
./GB941561_4lanes/CAATTCGT_readname.txt.R1.bed.hg18.uniq	222241	160523	0.277708
./GB941561_4lanes/CACAGTTG_readname.txt.R1.bed.hg18.uniq	9396	6997	0.255321
./GB941561_4lanes/CCTCATGT_readname.txt.R1.bed.hg18.uniq	52679	38389	0.271266
./GB941561_4lanes/CGAACTAC_readname.txt.R1.bed.hg18.uniq	255257	183936	0.279409
./GB941561_4lanes/CTCTGATT_readname.txt.R1.bed.hg18.uniq	8908	6793	0.237427
./GB941561_4lanes/GACGTTAA_readname.txt.R1.bed.hg18.uniq	8992	6730	0.251557
./GB941561_4lanes/GAGCGATA_readname.txt.R1.bed.hg18.uniq	1555	1499	0.0360129
./GB941561_4lanes/GCTTAGTA_readname.txt.R1.bed.hg18.uniq	10016	7480	0.253195
./GB941561_4lanes/GGATCATC_readname.txt.R1.bed.hg18.uniq	43050	30960	0.280836
./GB941561_4lanes/GTCTCCTA_readname.txt.R1.bed.hg18.uniq	121580	86426	0.289143
./GB941561_4lanes/GTTATATC_readname.txt.R1.bed.hg18.uniq	50816	37454	0.262949
./GB941561_4lanes/TAACGTGT_readname.txt.R1.bed.hg18.uniq	267606	190458	0.28829
./GB941561_4lanes/TAAGGTGT_readname.txt.R1.bed.hg18.uniq	74192	53447	0.279612
./GB941561_4lanes/TACAGTGT_readname.txt.R1.bed.hg18.uniq	2800	2263	0.191786
./GB941561_4lanes/TAGTTCTG_readname.txt.R1.bed.hg18.uniq	38810	28649	0.261814
./GB941561_4lanes/TCAAGTTG_readname.txt.R1.bed.hg18.uniq	6485	4923	0.240864
./GB941561_4lanes/TCATCGTG_readname.txt.R1.bed.hg18.uniq	62575	45475	0.273272
./GB941561_4lanes/TCCTGCTG_readname.txt.R1.bed.hg18.uniq	17334	12419	0.283547
./GB941561_4lanes/TCTGTTGT_readname.txt.R1.bed.hg18.uniq	46699	33979	0.272383
./GB941561_4lanes/TGGCGTAT_readname.txt.R1.bed.hg18.uniq	9506	7177	0.245003
./GB941562_4lanes/AGTTGACC_readname.txt.R1.bed.hg18.uniq	17923	12567	0.298834
./GB941562_4lanes/ATATGCTG_readname.txt.R1.bed.hg18.uniq	10293	7462	0.275041
./GB941562_4lanes/ATGACTGT_readname.txt.R1.bed.hg18.uniq	23579	16181	0.313754
./GB941562_4lanes/ATTAAGCG_readname.txt.R1.bed.hg18.uniq	16736	11990	0.28358
./GB941562_4lanes/ATTGGCGT_readname.txt.R1.bed.hg18.uniq	89071	61923	0.304791
./GB941562_4lanes/CAAGGTCA_readname.txt.R1.bed.hg18.uniq	11018	7850	0.287529
./GB941562_4lanes/CAATGTGT_readname.txt.R1.bed.hg18.uniq	52121	36239	0.304714
./GB941562_4lanes/CAGTGATG_readname.txt.R1.bed.hg18.uniq	223820	154474	0.309829
./GB941562_4lanes/CATATGCT_readname.txt.R1.bed.hg18.uniq	15042	11205	0.255086
./GB941562_4lanes/CGATTACA_readname.txt.R1.bed.hg18.uniq	32017	22258	0.304807
./GB941562_4lanes/CTGCAATC_readname.txt.R1.bed.hg18.uniq	48458	33845	0.30156
./GB941562_4lanes/GATGGCTT_readname.txt.R1.bed.hg18.uniq	28045	19241	0.313924
./GB941562_4lanes/GTCTCCTA_readname.txt.R1.bed.hg18.uniq	36563	25620	0.299292
./GB941562_4lanes/GTGAACGT_readname.txt.R1.bed.hg18.uniq	71213	48474	0.31931
./GB941562_4lanes/TAACGTGT_readname.txt.R1.bed.hg18.uniq	10532	7421	0.295385
./GB941562_4lanes/TAGTTCTG_readname.txt.R1.bed.hg18.uniq	14019	10061	0.282331
./GB941562_4lanes/TCAAGTTG_readname.txt.R1.bed.hg18.uniq	10929	7963	0.271388
./GB941562_4lanes/TCAGCTTG_readname.txt.R1.bed.hg18.uniq	28410	19833	0.301901
./GB941562_4lanes/TCCGGTAT_readname.txt.R1.bed.hg18.uniq	45491	31666	0.303906
./GB941562_4lanes/TCCTGCTG_readname.txt.R1.bed.hg18.uniq	25528	17609	0.310208
./GB941562_4lanes/TCGTCGAT_readname.txt.R1.bed.hg18.uniq	28813	19937	0.308055
./GB941562_4lanes/TCTACTGT_readname.txt.R1.bed.hg18.uniq	45487	32765	0.279684
./GB941562_4lanes/TGATGCGA_readname.txt.R1.bed.hg18.uniq	333705	225416	0.324505
./GB941562_4lanes/TGCAGACA_readname.txt.R1.bed.hg18.uniq	15074	10492	0.303967
./GB941562_4lanes/TGGACATG_readname.txt.R1.bed.hg18.uniq	109033	74453	0.317152
./GB941563_4lanes/AAGAATCT_readname.txt.R1.bed.hg18.uniq	72436	53463	0.261928
./GB941563_4lanes/AATGACAG_readname.txt.R1.bed.hg18.uniq	18642	13327	0.285109
./GB941563_4lanes/ACTGCATG_readname.txt.R1.bed.hg18.uniq	143234	100508	0.298295
./GB941563_4lanes/AGCAATCC_readname.txt.R1.bed.hg18.uniq	3478	2646	0.239218
./GB941563_4lanes/ATACGACT_readname.txt.R1.bed.hg18.uniq	39063	28265	0.276425
./GB941563_4lanes/ATCTGATG_readname.txt.R1.bed.hg18.uniq	15202	11287	0.257532
./GB941563_4lanes/ATGGCTGT_readname.txt.R1.bed.hg18.uniq	50983	37226	0.269835
./GB941563_4lanes/ATTGGCGT_readname.txt.R1.bed.hg18.uniq	30529	22198	0.272888
./GB941563_4lanes/CAAGATAT_readname.txt.R1.bed.hg18.uniq	3264	2548	0.219363
./GB941563_4lanes/CAATGTGT_readname.txt.R1.bed.hg18.uniq	31780	23340	0.265576
./GB941563_4lanes/CAGTGATG_readname.txt.R1.bed.hg18.uniq	11868	8870	0.252612
./GB941563_4lanes/CATATGCT_readname.txt.R1.bed.hg18.uniq	9831	8546	0.130709
./GB941563_4lanes/CCTCATGT_readname.txt.R1.bed.hg18.uniq	44734	32834	0.266017
./GB941563_4lanes/CGTAATTA_readname.txt.R1.bed.hg18.uniq	25486	20412	0.19909
./GB941563_4lanes/CTCTGATT_readname.txt.R1.bed.hg18.uniq	8196	6209	0.242435
./GB941563_4lanes/CTGACGTT_readname.txt.R1.bed.hg18.uniq	4657	3429	0.263689
./GB941563_4lanes/CTGCAATC_readname.txt.R1.bed.hg18.uniq	40313	28859	0.284127
./GB941563_4lanes/CTTCGTTG_readname.txt.R1.bed.hg18.uniq	5779	4428	0.233777
./GB941563_4lanes/GACGTTAA_readname.txt.R1.bed.hg18.uniq	7803	5794	0.257465
./GB941563_4lanes/GATAACCA_readname.txt.R1.bed.hg18.uniq	41938	30414	0.274787
./GB941563_4lanes/GGAACTGT_readname.txt.R1.bed.hg18.uniq	11048	8349	0.244298
./GB941563_4lanes/GGATCATC_readname.txt.R1.bed.hg18.uniq	28060	20415	0.272452
./GB941563_4lanes/GTTATATC_readname.txt.R1.bed.hg18.uniq	16443	12177	0.259442
./GB941563_4lanes/TCAAGTTG_readname.txt.R1.bed.hg18.uniq	34345	24641	0.282545
./GB941563_4lanes/TTCACTAG_readname.txt.R1.bed.hg18.uniq	155937	113233	0.273854
./GB941564_4lanes/ACGTACTC_readname.txt.R1.bed.hg18.uniq	127333	89790	0.294841
./GB941564_4lanes/ATAGATAC_readname.txt.R1.bed.hg18.uniq	48583	35223	0.274993
./GB941564_4lanes/CAATTCGT_readname.txt.R1.bed.hg18.uniq	1213	1181	0.0263809
./GB941564_4lanes/CACAGTTG_readname.txt.R1.bed.hg18.uniq	22416	15994	0.286492
./GB941564_4lanes/CCTAGTAG_readname.txt.R1.bed.hg18.uniq	5571	4219	0.242685
./GB941564_4lanes/CGAACTAC_readname.txt.R1.bed.hg18.uniq	2696	2083	0.227374
./GB941564_4lanes/CGAGAATG_readname.txt.R1.bed.hg18.uniq	65515	43444	0.336885
./GB941564_4lanes/CTAGTGTG_readname.txt.R1.bed.hg18.uniq	20976	15052	0.282418
./GB941564_4lanes/GCTTAGTA_readname.txt.R1.bed.hg18.uniq	87736	62890	0.28319
./GB941564_4lanes/GGTCAATG_readname.txt.R1.bed.hg18.uniq	43710	30444	0.3035
./GB941564_4lanes/GTACCGAT_readname.txt.R1.bed.hg18.uniq	27413	19535	0.287382
./GB941564_4lanes/GTTATATC_readname.txt.R1.bed.hg18.uniq	28849	20727	0.281535
./GB941564_4lanes/TACAGTGT_readname.txt.R1.bed.hg18.uniq	81310	58114	0.285279
./GB941564_4lanes/TAGCAGTT_readname.txt.R1.bed.hg18.uniq	21790	15875	0.271455
./GB941564_4lanes/TCGATTAA_readname.txt.R1.bed.hg18.uniq	2855	2631	0.0784588
./GB941564_4lanes/TCTACTGT_readname.txt.R1.bed.hg18.uniq	112642	81393	0.277419
./GB941564_4lanes/TGGACATG_readname.txt.R1.bed.hg18.uniq	2335	2143	0.082227
./GB941564_4lanes/TTCACTAG_readname.txt.R1.bed.hg18.uniq	14113	10500	0.256005
./GB941565_4lanes/AAGAGGTT_readname.txt.R1.bed.hg18.uniq	4823	3761	0.220195
./GB941565_4lanes/ACACACGT_readname.txt.R1.bed.hg18.uniq	70546	51463	0.270504
./GB941565_4lanes/ACGTACGT_readname.txt.R1.bed.hg18.uniq	18366	13560	0.261679
./GB941565_4lanes/AGAATCAG_readname.txt.R1.bed.hg18.uniq	17459	12781	0.267942
./GB941565_4lanes/ATGACACC_readname.txt.R1.bed.hg18.uniq	5846	4527	0.225624
./GB941565_4lanes/ATTGGCGT_readname.txt.R1.bed.hg18.uniq	71761	52775	0.264573
./GB941565_4lanes/CAAGGTCA_readname.txt.R1.bed.hg18.uniq	16916	12364	0.269094
./GB941565_4lanes/CACTCTTG_readname.txt.R1.bed.hg18.uniq	48151	35510	0.262528
./GB941565_4lanes/CATATGCT_readname.txt.R1.bed.hg18.uniq	3689	3409	0.0759013
./GB941565_4lanes/CATGGTGT_readname.txt.R1.bed.hg18.uniq	1086	1058	0.0257827
./GB941565_4lanes/CCTCATGT_readname.txt.R1.bed.hg18.uniq	73579	54845	0.254611
./GB941565_4lanes/CGAGAATG_readname.txt.R1.bed.hg18.uniq	73075	54206	0.258214
./GB941565_4lanes/CGATTACA_readname.txt.R1.bed.hg18.uniq	174646	128491	0.264277
./GB941565_4lanes/CTGCAATC_readname.txt.R1.bed.hg18.uniq	84024	62726	0.253475
./GB941565_4lanes/GACGTTAA_readname.txt.R1.bed.hg18.uniq	9564	7184	0.24885
./GB941565_4lanes/GACTAAGA_readname.txt.R1.bed.hg18.uniq	4173	3297	0.209921
./GB941565_4lanes/GGATCATC_readname.txt.R1.bed.hg18.uniq	3660	2809	0.232514
./GB941565_4lanes/GTACCGAT_readname.txt.R1.bed.hg18.uniq	56697	41343	0.270808
./GB941565_4lanes/GTGAACGT_readname.txt.R1.bed.hg18.uniq	3622	2734	0.245168
./GB941565_4lanes/TAACGTGT_readname.txt.R1.bed.hg18.uniq	15057	11019	0.268181
./GB941565_4lanes/TACAGTGT_readname.txt.R1.bed.hg18.uniq	1442	1249	0.133842
./GB941565_4lanes/TCCTGCTG_readname.txt.R1.bed.hg18.uniq	27355	20511	0.250192
./GB941565_4lanes/TGATGCGA_readname.txt.R1.bed.hg18.uniq	6770	5089	0.248301
./GB941565_4lanes/TGCAGACA_readname.txt.R1.bed.hg18.uniq	7125	6307	0.114807
./GB941565_4lanes/TTCACTAG_readname.txt.R1.bed.hg18.uniq	106258	79638	0.250522
./GB941566_4lanes/ACACACGT_readname.txt.R1.bed.hg18.uniq	7291	5380	0.262104
./GB941566_4lanes/ACGTACGT_readname.txt.R1.bed.hg18.uniq	39845	28996	0.27228
./GB941566_4lanes/AGAATCAG_readname.txt.R1.bed.hg18.uniq	23338	17240	0.261291
./GB941566_4lanes/AGCAATCC_readname.txt.R1.bed.hg18.uniq	54595	39902	0.269127
./GB941566_4lanes/AGTTGACC_readname.txt.R1.bed.hg18.uniq	53804	39267	0.270184
./GB941566_4lanes/ATAGATAC_readname.txt.R1.bed.hg18.uniq	14360	10683	0.256058
./GB941566_4lanes/ATGACTGT_readname.txt.R1.bed.hg18.uniq	7760	5870	0.243557
./GB941566_4lanes/CAAGATAT_readname.txt.R1.bed.hg18.uniq	30665	22479	0.266949
./GB941566_4lanes/CAGCTCTT_readname.txt.R1.bed.hg18.uniq	70072	50941	0.273019
./GB941566_4lanes/CAGTGATG_readname.txt.R1.bed.hg18.uniq	84279	60699	0.279785
./GB941566_4lanes/CATGGTGT_readname.txt.R1.bed.hg18.uniq	8603	6357	0.261072
./GB941566_4lanes/CCTAGTAG_readname.txt.R1.bed.hg18.uniq	71679	52061	0.273692
./GB941566_4lanes/CGATTACA_readname.txt.R1.bed.hg18.uniq	3149	2373	0.246427
./GB941566_4lanes/CTTCGTTG_readname.txt.R1.bed.hg18.uniq	86389	62764	0.273472
./GB941566_4lanes/GATATTGT_readname.txt.R1.bed.hg18.uniq	13720	10592	0.227988
./GB941566_4lanes/GGAACTGT_readname.txt.R1.bed.hg18.uniq	53700	38724	0.278883
./GB941566_4lanes/TACACTGT_readname.txt.R1.bed.hg18.uniq	4633	3453	0.254695
./GB941566_4lanes/TACAGTGT_readname.txt.R1.bed.hg18.uniq	114783	82139	0.284398
./GB941566_4lanes/TAGTTCTG_readname.txt.R1.bed.hg18.uniq	78094	56633	0.27481
./GB941566_4lanes/TCGTCGAT_readname.txt.R1.bed.hg18.uniq	37929	26788	0.293733
./GB941566_4lanes/TGCAGACA_readname.txt.R1.bed.hg18.uniq	21655	15788	0.270931
./GB941566_4lanes/TGGACATG_readname.txt.R1.bed.hg18.uniq	43261	31583	0.269943
./GB941567_4lanes/AATCGGAT_readname.txt.R1.bed.hg18.uniq	105729	76807	0.273548
./GB941567_4lanes/ACGTACGT_readname.txt.R1.bed.hg18.uniq	53515	38165	0.286835
./GB941567_4lanes/AGCAATCC_readname.txt.R1.bed.hg18.uniq	212544	153037	0.279975
./GB941567_4lanes/ATAGATAC_readname.txt.R1.bed.hg18.uniq	18085	13321	0.263423
./GB941567_4lanes/ATGGACTG_readname.txt.R1.bed.hg18.uniq	10570	7874	0.255061
./GB941567_4lanes/CAAGATAT_readname.txt.R1.bed.hg18.uniq	30775	22499	0.26892
./GB941567_4lanes/CAAGGTCA_readname.txt.R1.bed.hg18.uniq	8371	6265	0.251583
./GB941567_4lanes/CGAGAATG_readname.txt.R1.bed.hg18.uniq	20520	14820	0.277778
./GB941567_4lanes/CTAAGTGT_readname.txt.R1.bed.hg18.uniq	9721	6690	0.311799
./GB941567_4lanes/CTGCAATC_readname.txt.R1.bed.hg18.uniq	90734	66461	0.267518
./GB941567_4lanes/CTTCGTTG_readname.txt.R1.bed.hg18.uniq	3033	2483	0.181339
./GB941567_4lanes/GACTAAGA_readname.txt.R1.bed.hg18.uniq	24396	17635	0.277136
./GB941567_4lanes/GAGCGATA_readname.txt.R1.bed.hg18.uniq	119239	85294	0.28468
./GB941567_4lanes/GATATTGT_readname.txt.R1.bed.hg18.uniq	24010	17890	0.254894
./GB941567_4lanes/GCGTAATT_readname.txt.R1.bed.hg18.uniq	10555	7826	0.25855
./GB941567_4lanes/GTGAACGT_readname.txt.R1.bed.hg18.uniq	236750	168241	0.289373
./GB941567_4lanes/TAACCAAG_readname.txt.R1.bed.hg18.uniq	2316	1778	0.232297
./GB941567_4lanes/TAGTTCTG_readname.txt.R1.bed.hg18.uniq	182014	131229	0.279017
./GB941567_4lanes/TCAGCTTG_readname.txt.R1.bed.hg18.uniq	8946	6701	0.25095
./GB941567_4lanes/TCCGGTAT_readname.txt.R1.bed.hg18.uniq	11638	8713	0.251332
./GB941567_4lanes/TCCTGCTG_readname.txt.R1.bed.hg18.uniq	5781	4265	0.262238
./GB941567_4lanes/TCGATTAA_readname.txt.R1.bed.hg18.uniq	7755	5914	0.237395
./GB941567_4lanes/TCGTCGAT_readname.txt.R1.bed.hg18.uniq	52122	37388	0.282683
./GB941567_4lanes/TGGACATG_readname.txt.R1.bed.hg18.uniq	11636	8373	0.280423
./GB941567_4lanes/TTCACTAG_readname.txt.R1.bed.hg18.uniq	10792	7979	0.260656
./GB941568_4lanes/AAGAATCT_readname.txt.R1.bed.hg18.uniq	4335	3361	0.224683
./GB941568_4lanes/AATGACAG_readname.txt.R1.bed.hg18.uniq	58614	42474	0.275361
./GB941568_4lanes/ACGTACGT_readname.txt.R1.bed.hg18.uniq	38174	27535	0.278698
./GB941568_4lanes/ACGTACTC_readname.txt.R1.bed.hg18.uniq	13250	9724	0.266113
./GB941568_4lanes/AGCAATCC_readname.txt.R1.bed.hg18.uniq	83390	61348	0.264324
./GB941568_4lanes/ATACGACT_readname.txt.R1.bed.hg18.uniq	86152	62901	0.269883
./GB941568_4lanes/ATATGCTG_readname.txt.R1.bed.hg18.uniq	2870	2221	0.226132
./GB941568_4lanes/ATGACACC_readname.txt.R1.bed.hg18.uniq	19168	13999	0.269668
./GB941568_4lanes/CATGTAGA_readname.txt.R1.bed.hg18.uniq	37176	27049	0.272407
./GB941568_4lanes/CATGTATT_readname.txt.R1.bed.hg18.uniq	10593	9499	0.103276
./GB941568_4lanes/CATGTGTG_readname.txt.R1.bed.hg18.uniq	25757	18804	0.269946
./GB941568_4lanes/CTAAGTGT_readname.txt.R1.bed.hg18.uniq	2807	2197	0.217314
./GB941568_4lanes/CTAGTGTG_readname.txt.R1.bed.hg18.uniq	108242	78675	0.273156
./GB941568_4lanes/CTTCGTTG_readname.txt.R1.bed.hg18.uniq	5622	4279	0.238883
./GB941568_4lanes/GACGTTAA_readname.txt.R1.bed.hg18.uniq	29295	21262	0.274211
./GB941568_4lanes/GATATTGT_readname.txt.R1.bed.hg18.uniq	7437	5602	0.246739
./GB941568_4lanes/GATGGCTT_readname.txt.R1.bed.hg18.uniq	8028	6009	0.251495
./GB941568_4lanes/TACACTGT_readname.txt.R1.bed.hg18.uniq	115699	83644	0.277055
./GB941568_4lanes/TCAGCTTG_readname.txt.R1.bed.hg18.uniq	9326	6917	0.25831
./GB941568_4lanes/TCCTGCTG_readname.txt.R1.bed.hg18.uniq	15828	11495	0.273755
./GB941568_4lanes/TCGTTAGC_readname.txt.R1.bed.hg18.uniq	21725	15569	0.28336
./GB941568_4lanes/TCTGTTGT_readname.txt.R1.bed.hg18.uniq	13989	10259	0.266638
./GB941568_4lanes/TGATGCGA_readname.txt.R1.bed.hg18.uniq	55005	39516	0.281593
./GB941569_4lanes/AAGAATCT_readname.txt.R1.bed.hg18.uniq	65152	47185	0.275771
./GB941569_4lanes/ACGTACTC_readname.txt.R1.bed.hg18.uniq	22802	15996	0.298483
./GB941569_4lanes/ATTAAGCG_readname.txt.R1.bed.hg18.uniq	11540	8561	0.258146
./GB941569_4lanes/CAAGATAT_readname.txt.R1.bed.hg18.uniq	6921	4966	0.282474
./GB941569_4lanes/CAAGGTCA_readname.txt.R1.bed.hg18.uniq	121209	85137	0.297602
./GB941569_4lanes/CAAGTCAC_readname.txt.R1.bed.hg18.uniq	62052	44029	0.29045
./GB941569_4lanes/CAATGTGT_readname.txt.R1.bed.hg18.uniq	101777	72385	0.288788
./GB941569_4lanes/CATAACTT_readname.txt.R1.bed.hg18.uniq	28311	20144	0.288474
./GB941569_4lanes/CATGTAGA_readname.txt.R1.bed.hg18.uniq	14410	10369	0.28043
./GB941569_4lanes/CCTCATGT_readname.txt.R1.bed.hg18.uniq	48286	34783	0.279646
./GB941569_4lanes/CGAACTAC_readname.txt.R1.bed.hg18.uniq	74687	52746	0.293773
./GB941569_4lanes/CGTAATTA_readname.txt.R1.bed.hg18.uniq	6619	5386	0.186282
./GB941569_4lanes/CTTCGTTG_readname.txt.R1.bed.hg18.uniq	7873	5949	0.24438
./GB941569_4lanes/GATAACCA_readname.txt.R1.bed.hg18.uniq	9564	6987	0.269448
./GB941569_4lanes/GATATTGT_readname.txt.R1.bed.hg18.uniq	8990	6596	0.266296
./GB941569_4lanes/GGAACTGT_readname.txt.R1.bed.hg18.uniq	103114	72561	0.296303
./GB941569_4lanes/TACGCGTT_readname.txt.R1.bed.hg18.uniq	30960	22062	0.287403
./GB941569_4lanes/TAGACGGA_readname.txt.R1.bed.hg18.uniq	21352	15327	0.282175
./GB941569_4lanes/TAGCAGTT_readname.txt.R1.bed.hg18.uniq	45103	31869	0.293417
./GB941569_4lanes/TCAAGTTG_readname.txt.R1.bed.hg18.uniq	136414	96948	0.28931
./GB941569_4lanes/TCGTTAGC_readname.txt.R1.bed.hg18.uniq	46994	33307	0.29125
./GB941569_4lanes/TCTGTTGT_readname.txt.R1.bed.hg18.uniq	120123	85404	0.289029
./GB941569_4lanes/TGAGCGAA_readname.txt.R1.bed.hg18.uniq	22469	15588	0.306244
./GB941569_4lanes/TGGCGTAT_readname.txt.R1.bed.hg18.uniq	15510	11271	0.273308
./GB941569_4lanes/TTCACGAT_readname.txt.R1.bed.hg18.uniq	11315	8188	0.276359
./GB941570_4lanes/AAGAATCT_readname.txt.R1.bed.hg18.uniq	77251	56872	0.263802
./GB941570_4lanes/ACGTACGT_readname.txt.R1.bed.hg18.uniq	12209	8809	0.278483
./GB941570_4lanes/ACGTACTC_readname.txt.R1.bed.hg18.uniq	3464	2574	0.256928
./GB941570_4lanes/ATACGACT_readname.txt.R1.bed.hg18.uniq	2463	1930	0.216403
./GB941570_4lanes/ATTGGCGT_readname.txt.R1.bed.hg18.uniq	87236	62846	0.279586
./GB941570_4lanes/CAAGGTCA_readname.txt.R1.bed.hg18.uniq	2588	1997	0.228362
./GB941570_4lanes/CAGCTCTT_readname.txt.R1.bed.hg18.uniq	6265	4699	0.24996
./GB941570_4lanes/CATGGTGT_readname.txt.R1.bed.hg18.uniq	42602	31116	0.269612
./GB941570_4lanes/CATGTATT_readname.txt.R1.bed.hg18.uniq	9677	7139	0.262271
./GB941570_4lanes/CGATTACA_readname.txt.R1.bed.hg18.uniq	6147	4440	0.277696
./GB941570_4lanes/CGTAATTA_readname.txt.R1.bed.hg18.uniq	11504	8915	0.225052
./GB941570_4lanes/CTGACGTT_readname.txt.R1.bed.hg18.uniq	33090	23804	0.280629
./GB941570_4lanes/GATAACCA_readname.txt.R1.bed.hg18.uniq	32558	23626	0.274341
./GB941570_4lanes/GGAACTGT_readname.txt.R1.bed.hg18.uniq	66438	48103	0.275972
./GB941570_4lanes/TAACCAAG_readname.txt.R1.bed.hg18.uniq	18587	13606	0.267983
./GB941570_4lanes/TAGACGGA_readname.txt.R1.bed.hg18.uniq	4863	3626	0.25437
./GB941570_4lanes/TAGTTCTG_readname.txt.R1.bed.hg18.uniq	30372	22151	0.270677
./GB941570_4lanes/TCATCGTG_readname.txt.R1.bed.hg18.uniq	73303	51258	0.300738
./GB941570_4lanes/TCCGGTAT_readname.txt.R1.bed.hg18.uniq	33855	24444	0.27798
./GB941570_4lanes/TCTGTTGT_readname.txt.R1.bed.hg18.uniq	32280	23179	0.281939
./GB941570_4lanes/TGATGCGA_readname.txt.R1.bed.hg18.uniq	6649	4907	0.261994
./GB941570_4lanes/TGCAGACA_readname.txt.R1.bed.hg18.uniq	7001	5131	0.267105
./GB941571_4lanes/AAGAATCT_readname.txt.R1.bed.hg18.uniq	28400	20879	0.264824
./GB941571_4lanes/AAGAGGTT_readname.txt.R1.bed.hg18.uniq	4544	3441	0.242738
./GB941571_4lanes/AATCGGAT_readname.txt.R1.bed.hg18.uniq	5552	4181	0.246938
./GB941571_4lanes/AATGACAG_readname.txt.R1.bed.hg18.uniq	38171	27328	0.284064
./GB941571_4lanes/ACGTACGT_readname.txt.R1.bed.hg18.uniq	3775	2795	0.259603
./GB941571_4lanes/AGGCTTGA_readname.txt.R1.bed.hg18.uniq	28639	20349	0.289465
./GB941571_4lanes/AGTTGACC_readname.txt.R1.bed.hg18.uniq	23582	17094	0.275125
./GB941571_4lanes/ATCTGATG_readname.txt.R1.bed.hg18.uniq	78279	56627	0.2766
./GB941571_4lanes/ATGACTGT_readname.txt.R1.bed.hg18.uniq	31044	22592	0.272259
./GB941571_4lanes/CAAGGTCA_readname.txt.R1.bed.hg18.uniq	21421	15335	0.284114
./GB941571_4lanes/CAGCTCTT_readname.txt.R1.bed.hg18.uniq	116070	83432	0.281192
./GB941571_4lanes/CATATGCT_readname.txt.R1.bed.hg18.uniq	72567	54187	0.253283
./GB941571_4lanes/CCTCATGT_readname.txt.R1.bed.hg18.uniq	11172	8170	0.268707
./GB941571_4lanes/CGAACTAC_readname.txt.R1.bed.hg18.uniq	12285	8048	0.344892
./GB941571_4lanes/CGTAATTA_readname.txt.R1.bed.hg18.uniq	9167	6980	0.238573
./GB941571_4lanes/GGAACTGT_readname.txt.R1.bed.hg18.uniq	57079	41073	0.280418
./GB941571_4lanes/GTACCGAT_readname.txt.R1.bed.hg18.uniq	30724	22026	0.283101
./GB941571_4lanes/TACACTGT_readname.txt.R1.bed.hg18.uniq	14496	10625	0.267039
./GB941571_4lanes/TACGCGTT_readname.txt.R1.bed.hg18.uniq	22529	15905	0.294021
./GB941571_4lanes/TAGTTCTG_readname.txt.R1.bed.hg18.uniq	124180	89478	0.279449
./GB941571_4lanes/TCAAGTTG_readname.txt.R1.bed.hg18.uniq	39296	28830	0.266338
./GB941571_4lanes/TCCTGCTG_readname.txt.R1.bed.hg18.uniq	15544	11290	0.273675
./GB941571_4lanes/TCTGTTGT_readname.txt.R1.bed.hg18.uniq	16212	11607	0.284049
./GB941571_4lanes/TGAGCGAA_readname.txt.R1.bed.hg18.uniq	16764	11944	0.287521
./GB941571_4lanes/TGATGCGA_readname.txt.R1.bed.hg18.uniq	56394	40169	0.287708
./GB941572_4lanes/AATCGGAT_readname.txt.R1.bed.hg18.uniq	83741	63119	0.246259
./GB941572_4lanes/ACTGCATG_readname.txt.R1.bed.hg18.uniq	4625	3571	0.227892
./GB941572_4lanes/AGAGTTGT_readname.txt.R1.bed.hg18.uniq	48330	37048	0.233437
./GB941572_4lanes/ATACGACT_readname.txt.R1.bed.hg18.uniq	24354	18741	0.230475
./GB941572_4lanes/ATGGCTGT_readname.txt.R1.bed.hg18.uniq	22988	17617	0.233644
./GB941572_4lanes/CAAGATAT_readname.txt.R1.bed.hg18.uniq	65490	50241	0.232845
./GB941572_4lanes/CAATTCGT_readname.txt.R1.bed.hg18.uniq	4339	3409	0.214335
./GB941572_4lanes/CAGTGATG_readname.txt.R1.bed.hg18.uniq	7954	6107	0.23221
./GB941572_4lanes/CATGTGTG_readname.txt.R1.bed.hg18.uniq	2795	2570	0.0805009
./GB941572_4lanes/CTAGTGTG_readname.txt.R1.bed.hg18.uniq	139099	105145	0.2441
./GB941572_4lanes/CTTCGTTG_readname.txt.R1.bed.hg18.uniq	9911	7762	0.21683
./GB941572_4lanes/GACGTTAA_readname.txt.R1.bed.hg18.uniq	4830	3763	0.220911
./GB941572_4lanes/GAGACCTT_readname.txt.R1.bed.hg18.uniq	40341	30574	0.242111
./GB941572_4lanes/GATAACCA_readname.txt.R1.bed.hg18.uniq	2813	2264	0.195165
./GB941572_4lanes/GCGTAATT_readname.txt.R1.bed.hg18.uniq	7539	5832	0.226423
./GB941572_4lanes/GTACCGAT_readname.txt.R1.bed.hg18.uniq	31284	23608	0.245365
./GB941572_4lanes/TAACGTGT_readname.txt.R1.bed.hg18.uniq	79242	59386	0.250574
./GB941572_4lanes/TAAGGTGT_readname.txt.R1.bed.hg18.uniq	3262	2514	0.229307
./GB941572_4lanes/TAGACGGA_readname.txt.R1.bed.hg18.uniq	137193	103342	0.24674
./GB941572_4lanes/TCATCGTG_readname.txt.R1.bed.hg18.uniq	70106	52636	0.249194
./GB941572_4lanes/TCCTGCTG_readname.txt.R1.bed.hg18.uniq	69557	52709	0.242219
./GB941572_4lanes/TCGATTAA_readname.txt.R1.bed.hg18.uniq	52596	40259	0.234562
./GB941573_4lanes/AGGCTTGA_readname.txt.R1.bed.hg18.uniq	34343	24858	0.276184
./GB941573_4lanes/ATAGATAC_readname.txt.R1.bed.hg18.uniq	6537	4841	0.259446
./GB941573_4lanes/ATATGCTG_readname.txt.R1.bed.hg18.uniq	81175	58733	0.276464
./GB941573_4lanes/ATCTGATG_readname.txt.R1.bed.hg18.uniq	22164	16456	0.257535
./GB941573_4lanes/ATGGACTG_readname.txt.R1.bed.hg18.uniq	31440	22089	0.297424
./GB941573_4lanes/ATGGCTGT_readname.txt.R1.bed.hg18.uniq	8610	6303	0.267944
./GB941573_4lanes/CAATGTGT_readname.txt.R1.bed.hg18.uniq	3580	2721	0.239944
./GB941573_4lanes/CAGCTCTT_readname.txt.R1.bed.hg18.uniq	148137	108040	0.270675
./GB941573_4lanes/CATAACTT_readname.txt.R1.bed.hg18.uniq	13212	9661	0.268771
./GB941573_4lanes/CGAGAATG_readname.txt.R1.bed.hg18.uniq	10938	7992	0.269336
./GB941573_4lanes/CTAGTGTG_readname.txt.R1.bed.hg18.uniq	39427	28781	0.270018
./GB941573_4lanes/CTTCGTTG_readname.txt.R1.bed.hg18.uniq	30694	22357	0.271617
./GB941573_4lanes/GACGTTAA_readname.txt.R1.bed.hg18.uniq	235419	168590	0.283873
./GB941573_4lanes/GACTGTGT_readname.txt.R1.bed.hg18.uniq	48396	34596	0.285148
./GB941573_4lanes/GGATCATC_readname.txt.R1.bed.hg18.uniq	2588	1981	0.234544
./GB941573_4lanes/TAACGTGT_readname.txt.R1.bed.hg18.uniq	50114	36372	0.274215
./GB941573_4lanes/TAGACGGA_readname.txt.R1.bed.hg18.uniq	6050	4523	0.252397
./GB941573_4lanes/TCATCGTG_readname.txt.R1.bed.hg18.uniq	11388	8255	0.275114
./GB941573_4lanes/TCCGGTAT_readname.txt.R1.bed.hg18.uniq	127932	92245	0.278953
./GB941573_4lanes/TGGCGTAT_readname.txt.R1.bed.hg18.uniq	72552	53160	0.267284
./GB941573_4lanes/TTAAGCAT_readname.txt.R1.bed.hg18.uniq	16647	12361	0.257464
./GB941574_4lanes/AATCGGAT_readname.txt.R1.bed.hg18.uniq	113901	80183	0.296029
./GB941574_4lanes/ACACACGT_readname.txt.R1.bed.hg18.uniq	72942	50670	0.305338
./GB941574_4lanes/ACGTACGT_readname.txt.R1.bed.hg18.uniq	17541	12564	0.283735
./GB941574_4lanes/AGAATCAG_readname.txt.R1.bed.hg18.uniq	84878	60189	0.290876
./GB941574_4lanes/AGCAATCC_readname.txt.R1.bed.hg18.uniq	62594	44143	0.294773
./GB941574_4lanes/ATCTGATG_readname.txt.R1.bed.hg18.uniq	41967	30133	0.281983
./GB941574_4lanes/CAAGTCAC_readname.txt.R1.bed.hg18.uniq	58529	41743	0.286798
./GB941574_4lanes/CATAACTT_readname.txt.R1.bed.hg18.uniq	3576	2711	0.24189
./GB941574_4lanes/CATGGTGT_readname.txt.R1.bed.hg18.uniq	21918	15120	0.310156
./GB941574_4lanes/CTCTGATT_readname.txt.R1.bed.hg18.uniq	16880	12245	0.274585
./GB941574_4lanes/CTTCGTTG_readname.txt.R1.bed.hg18.uniq	1087	1032	0.050598
./GB941574_4lanes/GACGTTAA_readname.txt.R1.bed.hg18.uniq	12921	9198	0.288136
./GB941574_4lanes/GAGCGATA_readname.txt.R1.bed.hg18.uniq	8523	6207	0.271735
./GB941574_4lanes/GATATTGT_readname.txt.R1.bed.hg18.uniq	5115	3819	0.253372
./GB941574_4lanes/GATGGCTT_readname.txt.R1.bed.hg18.uniq	86555	60980	0.295477
./GB941574_4lanes/GCGTAATT_readname.txt.R1.bed.hg18.uniq	5976	4348	0.272423
./GB941574_4lanes/GGAACTGT_readname.txt.R1.bed.hg18.uniq	7251	5178	0.285892
./GB941574_4lanes/GGATCATC_readname.txt.R1.bed.hg18.uniq	3968	2971	0.25126
./GB941574_4lanes/GGTCAATG_readname.txt.R1.bed.hg18.uniq	65835	46671	0.291091
./GB941574_4lanes/GTACCGAT_readname.txt.R1.bed.hg18.uniq	160175	111134	0.306171
./GB941574_4lanes/GTCTCCTA_readname.txt.R1.bed.hg18.uniq	44741	32113	0.282247
./GB941574_4lanes/TAACCAAG_readname.txt.R1.bed.hg18.uniq	23726	16909	0.287322
./GB941574_4lanes/TACGCGTT_readname.txt.R1.bed.hg18.uniq	41189	29112	0.293209
./GB941574_4lanes/TTCACGAT_readname.txt.R1.bed.hg18.uniq	1290	1219	0.0550388
./GB941575_4lanes/AACTGCCA_readname.txt.R1.bed.hg18.uniq	10481	7699	0.265433
./GB941575_4lanes/AATCGGAT_readname.txt.R1.bed.hg18.uniq	14238	10231	0.28143
./GB941575_4lanes/AATGACAG_readname.txt.R1.bed.hg18.uniq	11664	8521	0.269462
./GB941575_4lanes/AGGCTTGA_readname.txt.R1.bed.hg18.uniq	68161	48106	0.29423
./GB941575_4lanes/AGGTTGCT_readname.txt.R1.bed.hg18.uniq	5926	4348	0.266284
./GB941575_4lanes/ATACGACT_readname.txt.R1.bed.hg18.uniq	78400	55196	0.295969
./GB941575_4lanes/ATGGACTG_readname.txt.R1.bed.hg18.uniq	4941	3731	0.24489
./GB941575_4lanes/ATTAAGCG_readname.txt.R1.bed.hg18.uniq	36831	26821	0.271782
./GB941575_4lanes/CAGTGATG_readname.txt.R1.bed.hg18.uniq	46685	33244	0.287908
./GB941575_4lanes/CATAACTT_readname.txt.R1.bed.hg18.uniq	18831	13740	0.270352
./GB941575_4lanes/CATGTGTG_readname.txt.R1.bed.hg18.uniq	23208	16481	0.289857
./GB941575_4lanes/CCTAGTAG_readname.txt.R1.bed.hg18.uniq	6921	5175	0.252276
./GB941575_4lanes/CGAACTAC_readname.txt.R1.bed.hg18.uniq	3637	2812	0.226835
./GB941575_4lanes/CTAAGTGT_readname.txt.R1.bed.hg18.uniq	22667	16402	0.276393
./GB941575_4lanes/CTTCGTTG_readname.txt.R1.bed.hg18.uniq	133447	94977	0.288279
./GB941575_4lanes/GATATTGT_readname.txt.R1.bed.hg18.uniq	48862	35032	0.283042
./GB941575_4lanes/GTCTCCTA_readname.txt.R1.bed.hg18.uniq	43810	31984	0.269938
./GB941575_4lanes/TAAGGTGT_readname.txt.R1.bed.hg18.uniq	6047	4425	0.268232
./GB941575_4lanes/TCCGGTAT_readname.txt.R1.bed.hg18.uniq	5962	4315	0.27625
./GB941575_4lanes/TGGCGTAT_readname.txt.R1.bed.hg18.uniq	15621	11190	0.283657
./GB941575_4lanes/TTCACGAT_readname.txt.R1.bed.hg18.uniq	3133	2345	0.251516
./GB941575_4lanes/TTCACTAG_readname.txt.R1.bed.hg18.uniq	41969	30213	0.280112
./GB941576_4lanes/AATCGGAT_readname.txt.R1.bed.hg18.uniq	43676	31933	0.268866
./GB941576_4lanes/AGAGTTGT_readname.txt.R1.bed.hg18.uniq	5080	3971	0.218307
./GB941576_4lanes/ATGACTGT_readname.txt.R1.bed.hg18.uniq	25107	18440	0.265543
./GB941576_4lanes/CAAGTCAC_readname.txt.R1.bed.hg18.uniq	33679	24017	0.286885
./GB941576_4lanes/CAATTCGT_readname.txt.R1.bed.hg18.uniq	115084	83245	0.276659
./GB941576_4lanes/CACAGTTG_readname.txt.R1.bed.hg18.uniq	99884	72017	0.278994
./GB941576_4lanes/CCTAGTAG_readname.txt.R1.bed.hg18.uniq	133434	95930	0.281068
./GB941576_4lanes/CTCTGATT_readname.txt.R1.bed.hg18.uniq	70142	51471	0.266189
./GB941576_4lanes/GACTAAGA_readname.txt.R1.bed.hg18.uniq	46120	32967	0.285191
./GB941576_4lanes/GATAACCA_readname.txt.R1.bed.hg18.uniq	36914	26688	0.277022
./GB941576_4lanes/GATGGCTT_readname.txt.R1.bed.hg18.uniq	86318	62001	0.281714
./GB941576_4lanes/GCGTAATT_readname.txt.R1.bed.hg18.uniq	13081	9719	0.257014
./GB941576_4lanes/TACACTGT_readname.txt.R1.bed.hg18.uniq	25183	18368	0.270619
./GB941576_4lanes/TACGCGTT_readname.txt.R1.bed.hg18.uniq	22864	16294	0.287351
./GB941576_4lanes/TAGCAGTT_readname.txt.R1.bed.hg18.uniq	25686	18900	0.264191
./GB941576_4lanes/TAGTTCTG_readname.txt.R1.bed.hg18.uniq	118226	84149	0.288236
./GB941576_4lanes/TCAGCTTG_readname.txt.R1.bed.hg18.uniq	25491	18603	0.270213
./GB941576_4lanes/TGATGCGA_readname.txt.R1.bed.hg18.uniq	130114	92629	0.288094
./GB941576_4lanes/TGCAGACA_readname.txt.R1.bed.hg18.uniq	21756	15873	0.270408
./GB941577_4lanes/AAGAGGTT_readname.txt.R1.bed.hg18.uniq	8230	6008	0.269988
./GB941577_4lanes/AGGTTGCT_readname.txt.R1.bed.hg18.uniq	9242	6854	0.258386
./GB941577_4lanes/AGTTGACC_readname.txt.R1.bed.hg18.uniq	10119	7346	0.274039
./GB941577_4lanes/ATATGCTG_readname.txt.R1.bed.hg18.uniq	5646	4247	0.247786
./GB941577_4lanes/ATGGACTG_readname.txt.R1.bed.hg18.uniq	6259	4531	0.276082
./GB941577_4lanes/CAAGTCAC_readname.txt.R1.bed.hg18.uniq	66789	47490	0.288955
./GB941577_4lanes/CAATTCGT_readname.txt.R1.bed.hg18.uniq	16599	11985	0.277969
./GB941577_4lanes/CACAGTTG_readname.txt.R1.bed.hg18.uniq	124954	88360	0.29286
./GB941577_4lanes/CACTCTTG_readname.txt.R1.bed.hg18.uniq	39138	28173	0.280163
./GB941577_4lanes/CATGTATT_readname.txt.R1.bed.hg18.uniq	55579	39684	0.285989
./GB941577_4lanes/CATGTGTG_readname.txt.R1.bed.hg18.uniq	82283	56367	0.314962
./GB941577_4lanes/CCTAGTAG_readname.txt.R1.bed.hg18.uniq	82646	59486	0.280231
./GB941577_4lanes/CGAACTAC_readname.txt.R1.bed.hg18.uniq	116720	82702	0.29145
./GB941577_4lanes/CTAGTGTG_readname.txt.R1.bed.hg18.uniq	31566	21642	0.314389
./GB941577_4lanes/CTGACGTT_readname.txt.R1.bed.hg18.uniq	16821	12153	0.27751
./GB941577_4lanes/GAGACCTT_readname.txt.R1.bed.hg18.uniq	14447	10233	0.291687
./GB941577_4lanes/GATAACCA_readname.txt.R1.bed.hg18.uniq	99321	71093	0.28421
./GB941577_4lanes/GCGTAATT_readname.txt.R1.bed.hg18.uniq	55926	38956	0.303437
./GB941577_4lanes/GGATCATC_readname.txt.R1.bed.hg18.uniq	36155	25941	0.282506
./GB941577_4lanes/TACAGTGT_readname.txt.R1.bed.hg18.uniq	110830	79131	0.286015
./GB941577_4lanes/TAGACGGA_readname.txt.R1.bed.hg18.uniq	5807	4347	0.251421
./GB941577_4lanes/TCGATTAA_readname.txt.R1.bed.hg18.uniq	38967	27457	0.295378
./GB941577_4lanes/TCGTTAGC_readname.txt.R1.bed.hg18.uniq	67380	47169	0.299955
./GB941577_4lanes/TGATGCGA_readname.txt.R1.bed.hg18.uniq	49097	34241	0.302585
./GB941577_4lanes/TGGCGTAT_readname.txt.R1.bed.hg18.uniq	14228	10406	0.268625
./GB941578_4lanes/AAGAATCT_readname.txt.R1.bed.hg18.uniq	14392	10813	0.24868
./GB941578_4lanes/ACACACGT_readname.txt.R1.bed.hg18.uniq	28182	20364	0.277411
./GB941578_4lanes/ACGTACTC_readname.txt.R1.bed.hg18.uniq	220110	155893	0.29175
./GB941578_4lanes/ATTAAGCG_readname.txt.R1.bed.hg18.uniq	10887	8049	0.260678
./GB941578_4lanes/CAATTCGT_readname.txt.R1.bed.hg18.uniq	4435	3373	0.239459
./GB941578_4lanes/CACAGTTG_readname.txt.R1.bed.hg18.uniq	2743	2153	0.215093
./GB941578_4lanes/CAGTGATG_readname.txt.R1.bed.hg18.uniq	10411	7710	0.259437
./GB941578_4lanes/CATATGCT_readname.txt.R1.bed.hg18.uniq	15841	11838	0.252699
./GB941578_4lanes/CATGTATT_readname.txt.R1.bed.hg18.uniq	25564	18456	0.278047
./GB941578_4lanes/CGAACTAC_readname.txt.R1.bed.hg18.uniq	20311	14695	0.2765
./GB941578_4lanes/CGAGAATG_readname.txt.R1.bed.hg18.uniq	77906	55936	0.282007
./GB941578_4lanes/CTAGTGTG_readname.txt.R1.bed.hg18.uniq	58663	42269	0.279461
./GB941578_4lanes/CTGCAATC_readname.txt.R1.bed.hg18.uniq	17389	12945	0.255564
./GB941578_4lanes/GAGCGATA_readname.txt.R1.bed.hg18.uniq	27738	19807	0.285925
./GB941578_4lanes/GATGGCTT_readname.txt.R1.bed.hg18.uniq	101957	72815	0.285826
./GB941578_4lanes/GCGTAATT_readname.txt.R1.bed.hg18.uniq	5908	4347	0.264218
./GB941578_4lanes/GCTTAGTA_readname.txt.R1.bed.hg18.uniq	42407	29533	0.303582
./GB941578_4lanes/GTACCGAT_readname.txt.R1.bed.hg18.uniq	30191	21320	0.293829
./GB941578_4lanes/GTTATATC_readname.txt.R1.bed.hg18.uniq	8205	6136	0.252163
./GB941578_4lanes/TACAGTGT_readname.txt.R1.bed.hg18.uniq	6855	4971	0.274836
./GB941578_4lanes/TAGACGGA_readname.txt.R1.bed.hg18.uniq	125599	89548	0.287033
./GB941578_4lanes/TCCGGTAT_readname.txt.R1.bed.hg18.uniq	26461	19104	0.278032
./GB941578_4lanes/TCTACTGT_readname.txt.R1.bed.hg18.uniq	84673	61790	0.270251
./GB941578_4lanes/TGAGCGAA_readname.txt.R1.bed.hg18.uniq	104903	74688	0.288028
./GB941578_4lanes/TGCAGACA_readname.txt.R1.bed.hg18.uniq	4391	3371	0.232293
./GB941579_4lanes/AATGACAG_readname.txt.R1.bed.hg18.uniq	67960	48918	0.280194
./GB941579_4lanes/ACGTACTC_readname.txt.R1.bed.hg18.uniq	12147	8749	0.27974
./GB941579_4lanes/AGCAATCC_readname.txt.R1.bed.hg18.uniq	19504	13825	0.291171
./GB941579_4lanes/ATCTGATG_readname.txt.R1.bed.hg18.uniq	3303	3223	0.0242204
./GB941579_4lanes/ATGACTGT_readname.txt.R1.bed.hg18.uniq	119447	86458	0.276181
./GB941579_4lanes/ATTAAGCG_readname.txt.R1.bed.hg18.uniq	93700	69110	0.262433
./GB941579_4lanes/CAAGATAT_readname.txt.R1.bed.hg18.uniq	7248	5555	0.233582
./GB941579_4lanes/CAATTCGT_readname.txt.R1.bed.hg18.uniq	3520	2791	0.207102
./GB941579_4lanes/CACTCTTG_readname.txt.R1.bed.hg18.uniq	37184	27296	0.265921
./GB941579_4lanes/CAGTGATG_readname.txt.R1.bed.hg18.uniq	68338	48872	0.284849
./GB941579_4lanes/CATAACTT_readname.txt.R1.bed.hg18.uniq	165663	120456	0.272885
./GB941579_4lanes/CATGGTGT_readname.txt.R1.bed.hg18.uniq	4660	3560	0.236052
./GB941579_4lanes/CGAGAATG_readname.txt.R1.bed.hg18.uniq	8016	6040	0.246507
./GB941579_4lanes/CTAAGTGT_readname.txt.R1.bed.hg18.uniq	4921	3666	0.255029
./GB941579_4lanes/CTGCAATC_readname.txt.R1.bed.hg18.uniq	4561	3485	0.235913
./GB941579_4lanes/CTTCGTTG_readname.txt.R1.bed.hg18.uniq	175891	127634	0.274357
./GB941579_4lanes/GACTAAGA_readname.txt.R1.bed.hg18.uniq	76812	55123	0.282365
./GB941579_4lanes/GGATCATC_readname.txt.R1.bed.hg18.uniq	5463	4077	0.253707
./GB941579_4lanes/GGTCAATG_readname.txt.R1.bed.hg18.uniq	96645	69280	0.28315
./GB941579_4lanes/TAACGTGT_readname.txt.R1.bed.hg18.uniq	36662	26366	0.280836
./GB941579_4lanes/TCATCGTG_readname.txt.R1.bed.hg18.uniq	9970	7321	0.265697
./GB941579_4lanes/TCTACTGT_readname.txt.R1.bed.hg18.uniq	246935	177416	0.281528
./GB941579_4lanes/TGCAGACA_readname.txt.R1.bed.hg18.uniq	106189	76443	0.280123
./GB941579_4lanes/TTAAGCAT_readname.txt.R1.bed.hg18.uniq	53717	38380	0.285515
./GB941579_4lanes/TTCACGAT_readname.txt.R1.bed.hg18.uniq	107396	77782	0.275746
./GB941580_4lanes/AAGAATCT_readname.txt.R1.bed.hg18.uniq	1103	1056	0.0426111
./GB941580_4lanes/AAGAGGTT_readname.txt.R1.bed.hg18.uniq	5383	4112	0.236114
./GB941580_4lanes/ACACACGT_readname.txt.R1.bed.hg18.uniq	3503	2588	0.261205
./GB941580_4lanes/AGAATCAG_readname.txt.R1.bed.hg18.uniq	17121	12411	0.275101
./GB941580_4lanes/AGCAATCC_readname.txt.R1.bed.hg18.uniq	74600	52064	0.302091
./GB941580_4lanes/AGGTTGCT_readname.txt.R1.bed.hg18.uniq	57417	40907	0.287546
./GB941580_4lanes/ATAGATAC_readname.txt.R1.bed.hg18.uniq	27733	20256	0.269607
./GB941580_4lanes/ATGACTGT_readname.txt.R1.bed.hg18.uniq	117270	83084	0.291515
./GB941580_4lanes/CAATGTGT_readname.txt.R1.bed.hg18.uniq	50583	35900	0.290275
./GB941580_4lanes/CACAGTTG_readname.txt.R1.bed.hg18.uniq	29403	21126	0.281502
./GB941580_4lanes/CATGGTGT_readname.txt.R1.bed.hg18.uniq	44708	31962	0.285094
./GB941580_4lanes/CATGTAGA_readname.txt.R1.bed.hg18.uniq	84399	60649	0.281401
./GB941580_4lanes/CGTAATTA_readname.txt.R1.bed.hg18.uniq	14117	10864	0.230431
./GB941580_4lanes/CTAAGTGT_readname.txt.R1.bed.hg18.uniq	5513	4050	0.265373
./GB941580_4lanes/CTTCGTTG_readname.txt.R1.bed.hg18.uniq	66884	48167	0.279843
./GB941580_4lanes/GATGGCTT_readname.txt.R1.bed.hg18.uniq	9728	6963	0.284231
./GB941580_4lanes/TACGCGTT_readname.txt.R1.bed.hg18.uniq	40812	29180	0.285014
./GB941580_4lanes/TCATCGTG_readname.txt.R1.bed.hg18.uniq	1919	1429	0.255341
./GB941580_4lanes/TTAAGCAT_readname.txt.R1.bed.hg18.uniq	2084	1583	0.240403
./GB941581_4lanes/AAGAATCT_readname.txt.R1.bed.hg18.uniq	5953	4434	0.255165
./GB941581_4lanes/AAGAGGTT_readname.txt.R1.bed.hg18.uniq	26239	19116	0.271466
./GB941581_4lanes/ACGTACGT_readname.txt.R1.bed.hg18.uniq	2414	1830	0.241922
./GB941581_4lanes/ACGTACTC_readname.txt.R1.bed.hg18.uniq	6833	5012	0.266501
./GB941581_4lanes/AGGTTGCT_readname.txt.R1.bed.hg18.uniq	36438	25804	0.291838
./GB941581_4lanes/ATGACTGT_readname.txt.R1.bed.hg18.uniq	62253	45280	0.272645
./GB941581_4lanes/CAATTCGT_readname.txt.R1.bed.hg18.uniq	17099	12582	0.264167
./GB941581_4lanes/CATATGCT_readname.txt.R1.bed.hg18.uniq	2601	1999	0.231449
./GB941581_4lanes/CATGTAGA_readname.txt.R1.bed.hg18.uniq	3350	2475	0.261194
./GB941581_4lanes/CATGTGTG_readname.txt.R1.bed.hg18.uniq	34258	24916	0.272695
./GB941581_4lanes/CCTAGTAG_readname.txt.R1.bed.hg18.uniq	103298	75456	0.269531
./GB941581_4lanes/CGATTACA_readname.txt.R1.bed.hg18.uniq	21744	16136	0.25791
./GB941581_4lanes/GACGTTAA_readname.txt.R1.bed.hg18.uniq	65881	48052	0.270624
./GB941581_4lanes/GAGCGATA_readname.txt.R1.bed.hg18.uniq	11959	8903	0.25554
./GB941581_4lanes/GCGTAATT_readname.txt.R1.bed.hg18.uniq	15179	11083	0.269846
./GB941581_4lanes/GGATCATC_readname.txt.R1.bed.hg18.uniq	14960	10900	0.27139
./GB941581_4lanes/GTGAACGT_readname.txt.R1.bed.hg18.uniq	20607	14599	0.291551
./GB941581_4lanes/GTTATATC_readname.txt.R1.bed.hg18.uniq	6971	5262	0.245159
./GB941581_4lanes/TAACGTGT_readname.txt.R1.bed.hg18.uniq	15087	11201	0.257573
./GB941581_4lanes/TACACTGT_readname.txt.R1.bed.hg18.uniq	66292	47736	0.279913
./GB941581_4lanes/TCGATTAA_readname.txt.R1.bed.hg18.uniq	78324	57473	0.266215
./GB941581_4lanes/TGAGCGAA_readname.txt.R1.bed.hg18.uniq	25098	18252	0.272771
./GB941581_4lanes/TGATGCGA_readname.txt.R1.bed.hg18.uniq	81584	58188	0.286772
./GB941581_4lanes/TTCACTAG_readname.txt.R1.bed.hg18.uniq	5045	3883	0.230327
./GB941582_4lanes/AATGACAG_readname.txt.R1.bed.hg18.uniq	8170	6118	0.251163
./GB941582_4lanes/ACACACGT_readname.txt.R1.bed.hg18.uniq	8324	6083	0.269222
./GB941582_4lanes/AGAATCAG_readname.txt.R1.bed.hg18.uniq	152115	108163	0.288939
./GB941582_4lanes/AGCAATCC_readname.txt.R1.bed.hg18.uniq	4437	3391	0.235745
./GB941582_4lanes/ATAGATAC_readname.txt.R1.bed.hg18.uniq	108170	78258	0.276528
./GB941582_4lanes/ATATGCTG_readname.txt.R1.bed.hg18.uniq	90358	64763	0.283262
./GB941582_4lanes/ATCTGATG_readname.txt.R1.bed.hg18.uniq	78339	56689	0.276363
./GB941582_4lanes/CAAGGTCA_readname.txt.R1.bed.hg18.uniq	4441	3269	0.263905
./GB941582_4lanes/CAATGTGT_readname.txt.R1.bed.hg18.uniq	9230	6842	0.258722
./GB941582_4lanes/CAATTCGT_readname.txt.R1.bed.hg18.uniq	87173	62219	0.286258
./GB941582_4lanes/CATAACTT_readname.txt.R1.bed.hg18.uniq	57126	41407	0.275164
./GB941582_4lanes/CATGGTGT_readname.txt.R1.bed.hg18.uniq	96718	66178	0.315763
./GB941582_4lanes/CGAGAATG_readname.txt.R1.bed.hg18.uniq	24374	17686	0.274391
./GB941582_4lanes/CTAAGTGT_readname.txt.R1.bed.hg18.uniq	47935	34580	0.278606
./GB941582_4lanes/CTCTGATT_readname.txt.R1.bed.hg18.uniq	26625	19397	0.271474
./GB941582_4lanes/CTTCGTTG_readname.txt.R1.bed.hg18.uniq	35785	25952	0.27478
./GB941582_4lanes/GACTAAGA_readname.txt.R1.bed.hg18.uniq	11406	8300	0.272313
./GB941582_4lanes/GCTTAGTA_readname.txt.R1.bed.hg18.uniq	6927	5110	0.262307
./GB941582_4lanes/GGATCATC_readname.txt.R1.bed.hg18.uniq	30778	21989	0.285561
./GB941582_4lanes/TACAGTGT_readname.txt.R1.bed.hg18.uniq	33672	24156	0.282609
./GB941582_4lanes/TAGACGGA_readname.txt.R1.bed.hg18.uniq	131669	93428	0.290433
./GB941582_4lanes/TCGTTAGC_readname.txt.R1.bed.hg18.uniq	10901	7950	0.270709
./GB941582_4lanes/TCTGTTGT_readname.txt.R1.bed.hg18.uniq	5503	4128	0.249864
./GB941582_4lanes/TGAGCGAA_readname.txt.R1.bed.hg18.uniq	8995	6412	0.28716
./GB941582_4lanes/TGGACATG_readname.txt.R1.bed.hg18.uniq	33322	23666	0.289779
./GB941583_4lanes/AAGAATCT_readname.txt.R1.bed.hg18.uniq	8063	6166	0.235272
./GB941583_4lanes/ACACACGT_readname.txt.R1.bed.hg18.uniq	15959	11790	0.261232
./GB941583_4lanes/ATACGACT_readname.txt.R1.bed.hg18.uniq	119935	88354	0.263318
./GB941583_4lanes/ATGGACTG_readname.txt.R1.bed.hg18.uniq	8414	6414	0.237699
./GB941583_4lanes/ATTGGCGT_readname.txt.R1.bed.hg18.uniq	7804	5921	0.241287
./GB941583_4lanes/CAAGATAT_readname.txt.R1.bed.hg18.uniq	38061	28391	0.254066
./GB941583_4lanes/CAAGTCAC_readname.txt.R1.bed.hg18.uniq	10819	8069	0.254182
./GB941583_4lanes/CACTCTTG_readname.txt.R1.bed.hg18.uniq	14860	10979	0.261171
./GB941583_4lanes/CAGTGATG_readname.txt.R1.bed.hg18.uniq	8980	6802	0.242539
./GB941583_4lanes/CATGTGTG_readname.txt.R1.bed.hg18.uniq	3327	2516	0.243763
./GB941583_4lanes/CCTAGTAG_readname.txt.R1.bed.hg18.uniq	15411	11620	0.245993
./GB941583_4lanes/CGAACTAC_readname.txt.R1.bed.hg18.uniq	42998	31664	0.263594
./GB941583_4lanes/CGATTACA_readname.txt.R1.bed.hg18.uniq	98962	72854	0.263818
./GB941583_4lanes/CTGACGTT_readname.txt.R1.bed.hg18.uniq	30008	22505	0.250033
./GB941583_4lanes/GACTGTGT_readname.txt.R1.bed.hg18.uniq	20867	15287	0.267408
./GB941583_4lanes/GAGCGATA_readname.txt.R1.bed.hg18.uniq	99713	72590	0.272011
./GB941583_4lanes/GATGGCTT_readname.txt.R1.bed.hg18.uniq	6254	4791	0.23393
./GB941583_4lanes/GCTTAGTA_readname.txt.R1.bed.hg18.uniq	10278	7564	0.264059
./GB941583_4lanes/GTACCGAT_readname.txt.R1.bed.hg18.uniq	14470	10701	0.26047
./GB941583_4lanes/TCTACTGT_readname.txt.R1.bed.hg18.uniq	135992	101177	0.256008
./GB941583_4lanes/TGATGCGA_readname.txt.R1.bed.hg18.uniq	5274	3880	0.264316
./GB941583_4lanes/TGCAGACA_readname.txt.R1.bed.hg18.uniq	45915	33897	0.261745
./GB941583_4lanes/TTCACGAT_readname.txt.R1.bed.hg18.uniq	7324	5450	0.255871
./GB941584_4lanes/AAGAGGTT_readname.txt.R1.bed.hg18.uniq	40599	29976	0.261657
./GB941584_4lanes/AGAGTTGT_readname.txt.R1.bed.hg18.uniq	2858	2277	0.203289
./GB941584_4lanes/AGCAATCC_readname.txt.R1.bed.hg18.uniq	22525	16514	0.266859
./GB941584_4lanes/AGGCTTGA_readname.txt.R1.bed.hg18.uniq	45372	33694	0.257383
./GB941584_4lanes/AGGTTGCT_readname.txt.R1.bed.hg18.uniq	4041	3147	0.221232
./GB941584_4lanes/AGTTGACC_readname.txt.R1.bed.hg18.uniq	9809	7430	0.242532
./GB941584_4lanes/ATACGACT_readname.txt.R1.bed.hg18.uniq	100195	73711	0.264325
./GB941584_4lanes/ATAGATAC_readname.txt.R1.bed.hg18.uniq	4396	3466	0.211556
./GB941584_4lanes/ATGACACC_readname.txt.R1.bed.hg18.uniq	80503	59865	0.256363
./GB941584_4lanes/ATGGACTG_readname.txt.R1.bed.hg18.uniq	37957	28226	0.256369
./GB941584_4lanes/CAAGTCAC_readname.txt.R1.bed.hg18.uniq	13810	10462	0.242433
./GB941584_4lanes/CAATGTGT_readname.txt.R1.bed.hg18.uniq	4259	3273	0.23151
./GB941584_4lanes/CATGGTGT_readname.txt.R1.bed.hg18.uniq	214266	148868	0.305219
./GB941584_4lanes/CGAGAATG_readname.txt.R1.bed.hg18.uniq	4720	3637	0.229449
./GB941584_4lanes/CGTAATTA_readname.txt.R1.bed.hg18.uniq	28742	23163	0.194106
./GB941584_4lanes/CTAAGTGT_readname.txt.R1.bed.hg18.uniq	13261	10045	0.242516
./GB941584_4lanes/GACGTTAA_readname.txt.R1.bed.hg18.uniq	52499	39018	0.256786
./GB941584_4lanes/GAGACCTT_readname.txt.R1.bed.hg18.uniq	16544	12482	0.245527
./GB941584_4lanes/GTGAACGT_readname.txt.R1.bed.hg18.uniq	13642	10189	0.253115
./GB941584_4lanes/TAGCAGTT_readname.txt.R1.bed.hg18.uniq	21183	15937	0.247651
./GB941584_4lanes/TCGATTAA_readname.txt.R1.bed.hg18.uniq	6767	5208	0.230383
./GB941584_4lanes/TGGCGTAT_readname.txt.R1.bed.hg18.uniq	25673	19462	0.241927
./GB941584_4lanes/TTAAGCAT_readname.txt.R1.bed.hg18.uniq	92492	70252	0.240453
./GB941584_4lanes/TTCACTAG_readname.txt.R1.bed.hg18.uniq	7172	5606	0.218349
./GB941585_4lanes/ACTGCATG_readname.txt.R1.bed.hg18.uniq	100973	72422	0.282759
./GB941585_4lanes/AGAGTTGT_readname.txt.R1.bed.hg18.uniq	36285	26862	0.259694
./GB941585_4lanes/ATATGCTG_readname.txt.R1.bed.hg18.uniq	97863	70605	0.278532
./GB941585_4lanes/ATGGACTG_readname.txt.R1.bed.hg18.uniq	22334	16310	0.269723
./GB941585_4lanes/ATTGGCGT_readname.txt.R1.bed.hg18.uniq	40563	29050	0.28383
./GB941585_4lanes/CAAGGTCA_readname.txt.R1.bed.hg18.uniq	76762	55091	0.282314
./GB941585_4lanes/CAGTGATG_readname.txt.R1.bed.hg18.uniq	238329	167428	0.297492
./GB941585_4lanes/CATGTAGA_readname.txt.R1.bed.hg18.uniq	34338	24589	0.283913
./GB941585_4lanes/CGAACTAC_readname.txt.R1.bed.hg18.uniq	58947	42628	0.276842
./GB941585_4lanes/CTCTGATT_readname.txt.R1.bed.hg18.uniq	94667	69572	0.265087
./GB941585_4lanes/CTGCAATC_readname.txt.R1.bed.hg18.uniq	142678	103665	0.273434
./GB941585_4lanes/CTTCGTTG_readname.txt.R1.bed.hg18.uniq	62588	45356	0.275324
./GB941585_4lanes/GACGTTAA_readname.txt.R1.bed.hg18.uniq	9172	6787	0.260031
./GB941585_4lanes/GACTGTGT_readname.txt.R1.bed.hg18.uniq	13276	9740	0.266345
./GB941585_4lanes/GAGCGATA_readname.txt.R1.bed.hg18.uniq	74196	53350	0.280959
./GB941585_4lanes/GATAACCA_readname.txt.R1.bed.hg18.uniq	18033	13291	0.262962
./GB941585_4lanes/GGATCATC_readname.txt.R1.bed.hg18.uniq	75329	54547	0.275883
./GB941585_4lanes/GGTCAATG_readname.txt.R1.bed.hg18.uniq	89884	64665	0.280573
./GB941585_4lanes/GTACCGAT_readname.txt.R1.bed.hg18.uniq	7323	5457	0.254814
./GB941585_4lanes/TAACGTGT_readname.txt.R1.bed.hg18.uniq	21347	15500	0.273903
./GB941585_4lanes/TAGCAGTT_readname.txt.R1.bed.hg18.uniq	72007	51632	0.282959
./GB941585_4lanes/TCATCGTG_readname.txt.R1.bed.hg18.uniq	26750	19574	0.268262
./GB941585_4lanes/TCGATTAA_readname.txt.R1.bed.hg18.uniq	17338	12818	0.260699
./GB941585_4lanes/TGCAGACA_readname.txt.R1.bed.hg18.uniq	72082	52113	0.277032
./GB941585_4lanes/TTAAGCAT_readname.txt.R1.bed.hg18.uniq	97907	71494	0.269776
./GB941586_4lanes/AGCAATCC_readname.txt.R1.bed.hg18.uniq	19465	14315	0.264577
./GB941586_4lanes/AGGTTGCT_readname.txt.R1.bed.hg18.uniq	92516	66777	0.278211
./GB941586_4lanes/ATCTGATG_readname.txt.R1.bed.hg18.uniq	53197	39019	0.266519
./GB941586_4lanes/ATGACTGT_readname.txt.R1.bed.hg18.uniq	61897	43731	0.293488
./GB941586_4lanes/CAAGATAT_readname.txt.R1.bed.hg18.uniq	72077	52070	0.277578
./GB941586_4lanes/CAAGGTCA_readname.txt.R1.bed.hg18.uniq	22278	16304	0.268157
./GB941586_4lanes/CAATGTGT_readname.txt.R1.bed.hg18.uniq	171733	123788	0.279183
./GB941586_4lanes/CAATTCGT_readname.txt.R1.bed.hg18.uniq	4975	3720	0.252261
./GB941586_4lanes/CATATGCT_readname.txt.R1.bed.hg18.uniq	29590	22814	0.228996
./GB941586_4lanes/CATGTATT_readname.txt.R1.bed.hg18.uniq	4799	3677	0.233799
./GB941586_4lanes/CGATTACA_readname.txt.R1.bed.hg18.uniq	4025	2971	0.261863
./GB941586_4lanes/CTCTGATT_readname.txt.R1.bed.hg18.uniq	180466	126597	0.298499
./GB941586_4lanes/CTGACGTT_readname.txt.R1.bed.hg18.uniq	1739	1402	0.19379
./GB941586_4lanes/CTTCGTTG_readname.txt.R1.bed.hg18.uniq	79039	56843	0.280823
./GB941586_4lanes/GAGCGATA_readname.txt.R1.bed.hg18.uniq	25619	18166	0.290917
./GB941586_4lanes/GATATTGT_readname.txt.R1.bed.hg18.uniq	16393	12368	0.245532
./GB941586_4lanes/GGAACTGT_readname.txt.R1.bed.hg18.uniq	28977	21041	0.273872
./GB941586_4lanes/TAACCAAG_readname.txt.R1.bed.hg18.uniq	13773	10131	0.26443
./GB941586_4lanes/TACAGTGT_readname.txt.R1.bed.hg18.uniq	4732	3658	0.226965
./GB941586_4lanes/TACGCGTT_readname.txt.R1.bed.hg18.uniq	164472	118614	0.278819
./GB941586_4lanes/TTAAGCAT_readname.txt.R1.bed.hg18.uniq	138974	101357	0.270677
./GB941587_4lanes/AAGAGGTT_readname.txt.R1.bed.hg18.uniq	40209	29967	0.254719
./GB941587_4lanes/ACGTACGT_readname.txt.R1.bed.hg18.uniq	36831	26996	0.26703
./GB941587_4lanes/ACGTACTC_readname.txt.R1.bed.hg18.uniq	7135	5329	0.253118
./GB941587_4lanes/AGGTTGCT_readname.txt.R1.bed.hg18.uniq	75247	55291	0.265207
./GB941587_4lanes/ATGGACTG_readname.txt.R1.bed.hg18.uniq	10266	7485	0.270894
./GB941587_4lanes/CAATGTGT_readname.txt.R1.bed.hg18.uniq	41899	30724	0.266713
./GB941587_4lanes/CACTCTTG_readname.txt.R1.bed.hg18.uniq	241551	171972	0.288051
./GB941587_4lanes/CAGTGATG_readname.txt.R1.bed.hg18.uniq	5412	4228	0.218773
./GB941587_4lanes/CATAACTT_readname.txt.R1.bed.hg18.uniq	11596	8748	0.245602
./GB941587_4lanes/CGAACTAC_readname.txt.R1.bed.hg18.uniq	66395	48939	0.262911
./GB941587_4lanes/CGATTACA_readname.txt.R1.bed.hg18.uniq	55494	40276	0.274228
./GB941587_4lanes/CTAAGTGT_readname.txt.R1.bed.hg18.uniq	6288	4705	0.251749
./GB941587_4lanes/GACGTTAA_readname.txt.R1.bed.hg18.uniq	28831	21035	0.270403
./GB941587_4lanes/GGAACTGT_readname.txt.R1.bed.hg18.uniq	8946	6733	0.247373
./GB941587_4lanes/TAACGTGT_readname.txt.R1.bed.hg18.uniq	20172	14866	0.263038
./GB941587_4lanes/TCGATTAA_readname.txt.R1.bed.hg18.uniq	118461	87653	0.260069
./GB941587_4lanes/TCTACTGT_readname.txt.R1.bed.hg18.uniq	214592	157760	0.264837
./GB941587_4lanes/TGCAGACA_readname.txt.R1.bed.hg18.uniq	40303	28830	0.284669
./GB941587_4lanes/TTCACTAG_readname.txt.R1.bed.hg18.uniq	104685	76739	0.266953
./GB941588_4lanes/AAGAGGTT_readname.txt.R1.bed.hg18.uniq	2508	1940	0.226475
./GB941588_4lanes/AATGACAG_readname.txt.R1.bed.hg18.uniq	174086	121808	0.3003
./GB941588_4lanes/ACGTACGT_readname.txt.R1.bed.hg18.uniq	38872	27552	0.291212
./GB941588_4lanes/AGAGTTGT_readname.txt.R1.bed.hg18.uniq	1203	1117	0.0714879
./GB941588_4lanes/AGGCTTGA_readname.txt.R1.bed.hg18.uniq	133557	93456	0.300254
./GB941588_4lanes/AGTTGACC_readname.txt.R1.bed.hg18.uniq	8861	6435	0.273784
./GB941588_4lanes/ATACGACT_readname.txt.R1.bed.hg18.uniq	1092	1009	0.0760073
./GB941588_4lanes/ATCTGATG_readname.txt.R1.bed.hg18.uniq	223487	160124	0.28352
./GB941588_4lanes/ATGGCTGT_readname.txt.R1.bed.hg18.uniq	66726	47605	0.28656
./GB941588_4lanes/ATTGGCGT_readname.txt.R1.bed.hg18.uniq	31957	23095	0.27731
./GB941588_4lanes/CACAGTTG_readname.txt.R1.bed.hg18.uniq	30684	21994	0.283209
./GB941588_4lanes/CAGTGATG_readname.txt.R1.bed.hg18.uniq	130484	92125	0.293975
./GB941588_4lanes/CATGGTGT_readname.txt.R1.bed.hg18.uniq	7216	5409	0.250416
./GB941588_4lanes/CATGTATT_readname.txt.R1.bed.hg18.uniq	191261	136851	0.28448
./GB941588_4lanes/CTAAGTGT_readname.txt.R1.bed.hg18.uniq	4080	3093	0.241912
./GB941588_4lanes/CTGCAATC_readname.txt.R1.bed.hg18.uniq	51462	37312	0.27496
./GB941588_4lanes/CTTCGTTG_readname.txt.R1.bed.hg18.uniq	8133	6154	0.24333
./GB941588_4lanes/GACGTTAA_readname.txt.R1.bed.hg18.uniq	55784	39647	0.289276
./GB941588_4lanes/GAGCGATA_readname.txt.R1.bed.hg18.uniq	6448	4805	0.254808
./GB941588_4lanes/GGAACTGT_readname.txt.R1.bed.hg18.uniq	1179	1116	0.0534351
./GB941588_4lanes/GGTCAATG_readname.txt.R1.bed.hg18.uniq	69085	48928	0.291771
./GB941588_4lanes/GTCTCCTA_readname.txt.R1.bed.hg18.uniq	38737	28107	0.274415
./GB941588_4lanes/TCGTTAGC_readname.txt.R1.bed.hg18.uniq	12932	9320	0.279307
./GB941589_4lanes/AAGAGGTT_readname.txt.R1.bed.hg18.uniq	13142	10086	0.232537
./GB941589_4lanes/AATCGGAT_readname.txt.R1.bed.hg18.uniq	4058	3104	0.235091
./GB941589_4lanes/ACACACGT_readname.txt.R1.bed.hg18.uniq	4228	3172	0.249763
./GB941589_4lanes/ACGTACGT_readname.txt.R1.bed.hg18.uniq	63844	47068	0.262765
./GB941589_4lanes/ACTGCATG_readname.txt.R1.bed.hg18.uniq	54211	40362	0.255465
./GB941589_4lanes/AGAGTTGT_readname.txt.R1.bed.hg18.uniq	14912	11426	0.233771
./GB941589_4lanes/AGCAATCC_readname.txt.R1.bed.hg18.uniq	8170	6375	0.219706
./GB941589_4lanes/AGTTGACC_readname.txt.R1.bed.hg18.uniq	4929	3749	0.239399
./GB941589_4lanes/ATCTGATG_readname.txt.R1.bed.hg18.uniq	17021	13036	0.234123
./GB941589_4lanes/ATGACACC_readname.txt.R1.bed.hg18.uniq	20462	15578	0.238686
./GB941589_4lanes/CAATGTGT_readname.txt.R1.bed.hg18.uniq	42458	31875	0.249258
./GB941589_4lanes/CAGTGATG_readname.txt.R1.bed.hg18.uniq	12658	9528	0.247274
./GB941589_4lanes/CATAACTT_readname.txt.R1.bed.hg18.uniq	12097	9322	0.229396
./GB941589_4lanes/CATGTAGA_readname.txt.R1.bed.hg18.uniq	95169	70887	0.255146
./GB941589_4lanes/CGAGAATG_readname.txt.R1.bed.hg18.uniq	16467	12680	0.229975
./GB941589_4lanes/GACGTTAA_readname.txt.R1.bed.hg18.uniq	25513	18916	0.258574
./GB941589_4lanes/GACTGTGT_readname.txt.R1.bed.hg18.uniq	76904	56808	0.261313
./GB941589_4lanes/GCGTAATT_readname.txt.R1.bed.hg18.uniq	31533	23447	0.25643
./GB941589_4lanes/GTACCGAT_readname.txt.R1.bed.hg18.uniq	33033	24549	0.256834
./GB941589_4lanes/TACAGTGT_readname.txt.R1.bed.hg18.uniq	27071	20233	0.252595
./GB941589_4lanes/TCATCGTG_readname.txt.R1.bed.hg18.uniq	4232	3238	0.234877
./GB941589_4lanes/TCTACTGT_readname.txt.R1.bed.hg18.uniq	5168	4045	0.217299
./GB941589_4lanes/TGGCGTAT_readname.txt.R1.bed.hg18.uniq	80517	60720	0.245874
./GB941589_4lanes/TTCACGAT_readname.txt.R1.bed.hg18.uniq	19671	14665	0.254486
./GB941590_4lanes/AACTGCCA_readname.txt.R1.bed.hg18.uniq	65696	46734	0.288632
./GB941590_4lanes/AGAGTTGT_readname.txt.R1.bed.hg18.uniq	45714	33226	0.273177
./GB941590_4lanes/AGTTGACC_readname.txt.R1.bed.hg18.uniq	61904	44361	0.28339
./GB941590_4lanes/CACTCTTG_readname.txt.R1.bed.hg18.uniq	14258	10430	0.268481
./GB941590_4lanes/CAGTGATG_readname.txt.R1.bed.hg18.uniq	61325	43549	0.289865
./GB941590_4lanes/CATGTAGA_readname.txt.R1.bed.hg18.uniq	41868	30123	0.280525
./GB941590_4lanes/CATGTATT_readname.txt.R1.bed.hg18.uniq	20027	14704	0.265791
./GB941590_4lanes/CGATTACA_readname.txt.R1.bed.hg18.uniq	5205	3929	0.245149
./GB941590_4lanes/CGTAATTA_readname.txt.R1.bed.hg18.uniq	3219	2570	0.201615
./GB941590_4lanes/CTAAGTGT_readname.txt.R1.bed.hg18.uniq	33489	24397	0.271492
./GB941590_4lanes/CTGACGTT_readname.txt.R1.bed.hg18.uniq	58141	41744	0.282021
./GB941590_4lanes/CTTCGTTG_readname.txt.R1.bed.hg18.uniq	46483	33691	0.275197
./GB941590_4lanes/GAGACCTT_readname.txt.R1.bed.hg18.uniq	38738	27531	0.289302
./GB941590_4lanes/GGTCAATG_readname.txt.R1.bed.hg18.uniq	1965	1607	0.182188
./GB941590_4lanes/GTACCGAT_readname.txt.R1.bed.hg18.uniq	6249	4571	0.268523
./GB941590_4lanes/GTCTCCTA_readname.txt.R1.bed.hg18.uniq	83650	59830	0.284758
./GB941590_4lanes/TACACTGT_readname.txt.R1.bed.hg18.uniq	7967	5907	0.258567
./GB941590_4lanes/TAGACGGA_readname.txt.R1.bed.hg18.uniq	52455	37477	0.28554
./GB941590_4lanes/TCAAGTTG_readname.txt.R1.bed.hg18.uniq	57729	42038	0.271804
./GB941590_4lanes/TCAGCTTG_readname.txt.R1.bed.hg18.uniq	48842	34890	0.285656
./GB941590_4lanes/TCCTGCTG_readname.txt.R1.bed.hg18.uniq	136136	95856	0.295881
./GB941591_4lanes/AATCGGAT_readname.txt.R1.bed.hg18.uniq	18546	13862	0.252561
./GB941591_4lanes/AGAGTTGT_readname.txt.R1.bed.hg18.uniq	12962	9756	0.247338
./GB941591_4lanes/AGCAATCC_readname.txt.R1.bed.hg18.uniq	38952	28561	0.266764
./GB941591_4lanes/AGGCTTGA_readname.txt.R1.bed.hg18.uniq	50782	37091	0.269603
./GB941591_4lanes/ATATGCTG_readname.txt.R1.bed.hg18.uniq	7099	5406	0.238484
./GB941591_4lanes/ATTGGCGT_readname.txt.R1.bed.hg18.uniq	11405	9037	0.207628
./GB941591_4lanes/CAAGGTCA_readname.txt.R1.bed.hg18.uniq	109763	79259	0.277908
./GB941591_4lanes/CACAGTTG_readname.txt.R1.bed.hg18.uniq	12535	9095	0.274432
./GB941591_4lanes/CATATGCT_readname.txt.R1.bed.hg18.uniq	14963	11662	0.220611
./GB941591_4lanes/CATGTGTG_readname.txt.R1.bed.hg18.uniq	22327	16570	0.257849
./GB941591_4lanes/CCTAGTAG_readname.txt.R1.bed.hg18.uniq	6252	4822	0.228727
./GB941591_4lanes/CGAGAATG_readname.txt.R1.bed.hg18.uniq	10055	7551	0.24903
./GB941591_4lanes/GACTAAGA_readname.txt.R1.bed.hg18.uniq	9291	6941	0.252933
./GB941591_4lanes/GAGACCTT_readname.txt.R1.bed.hg18.uniq	26271	19226	0.268166
./GB941591_4lanes/GATATTGT_readname.txt.R1.bed.hg18.uniq	20096	15017	0.252737
./GB941591_4lanes/GGATCATC_readname.txt.R1.bed.hg18.uniq	12537	9218	0.264736
./GB941591_4lanes/GGTCAATG_readname.txt.R1.bed.hg18.uniq	129926	95216	0.267152
./GB941591_4lanes/TACACTGT_readname.txt.R1.bed.hg18.uniq	13038	9669	0.258399
./GB941591_4lanes/TACGCGTT_readname.txt.R1.bed.hg18.uniq	15521	11457	0.261839
./GB941591_4lanes/TAGACGGA_readname.txt.R1.bed.hg18.uniq	30910	22811	0.262019
./GB941591_4lanes/TCAAGTTG_readname.txt.R1.bed.hg18.uniq	185000	135912	0.265341
./GB941591_4lanes/TGGACATG_readname.txt.R1.bed.hg18.uniq	4686	3556	0.241144
./GB941591_4lanes/TGGCGTAT_readname.txt.R1.bed.hg18.uniq	19789	14782	0.253019
./GB941592_4lanes/AATGACAG_readname.txt.R1.bed.hg18.uniq	106486	77729	0.270054
./GB941592_4lanes/ACTGCATG_readname.txt.R1.bed.hg18.uniq	14803	10939	0.261028
./GB941592_4lanes/AGAATCAG_readname.txt.R1.bed.hg18.uniq	14466	10840	0.250657
./GB941592_4lanes/AGTTGACC_readname.txt.R1.bed.hg18.uniq	13979	10536	0.246298
./GB941592_4lanes/ATACGACT_readname.txt.R1.bed.hg18.uniq	84494	63200	0.252018
./GB941592_4lanes/ATAGATAC_readname.txt.R1.bed.hg18.uniq	120132	87667	0.270244
./GB941592_4lanes/ATCTGATG_readname.txt.R1.bed.hg18.uniq	26634	19717	0.259706
./GB941592_4lanes/CAAGATAT_readname.txt.R1.bed.hg18.uniq	96710	71944	0.256085
./GB941592_4lanes/CAAGTCAC_readname.txt.R1.bed.hg18.uniq	67897	48359	0.287759
./GB941592_4lanes/CACAGTTG_readname.txt.R1.bed.hg18.uniq	33733	25137	0.254825
./GB941592_4lanes/CACTCTTG_readname.txt.R1.bed.hg18.uniq	7210	5491	0.238419
./GB941592_4lanes/CAGCTCTT_readname.txt.R1.bed.hg18.uniq	9971	7658	0.231973
./GB941592_4lanes/CATGTATT_readname.txt.R1.bed.hg18.uniq	10767	9993	0.0718863
./GB941592_4lanes/CCTCATGT_readname.txt.R1.bed.hg18.uniq	6845	5257	0.231994
./GB941592_4lanes/CGATTACA_readname.txt.R1.bed.hg18.uniq	32499	23972	0.262377
./GB941592_4lanes/CTCTGATT_readname.txt.R1.bed.hg18.uniq	5231	4132	0.210094
./GB941592_4lanes/CTTCGTTG_readname.txt.R1.bed.hg18.uniq	5590	4403	0.212343
./GB941592_4lanes/GACTAAGA_readname.txt.R1.bed.hg18.uniq	18896	13947	0.261907
./GB941592_4lanes/GTACCGAT_readname.txt.R1.bed.hg18.uniq	26644	19749	0.258782
./GB941592_4lanes/TAACCAAG_readname.txt.R1.bed.hg18.uniq	12027	8831	0.265735
./GB941592_4lanes/TAAGGTGT_readname.txt.R1.bed.hg18.uniq	341748	249966	0.268566
./GB941592_4lanes/TACACTGT_readname.txt.R1.bed.hg18.uniq	71824	52847	0.264215
./GB941592_4lanes/TCTACTGT_readname.txt.R1.bed.hg18.uniq	5502	4375	0.204835
./GB941592_4lanes/TCTGTTGT_readname.txt.R1.bed.hg18.uniq	8643	6533	0.244128
./GB941592_4lanes/TGAGCGAA_readname.txt.R1.bed.hg18.uniq	103970	76512	0.264095
./GB941593_4lanes/AAGAGGTT_readname.txt.R1.bed.hg18.uniq	165638	114220	0.310424
./GB941593_4lanes/ACTGCATG_readname.txt.R1.bed.hg18.uniq	49298	33706	0.316281
./GB941593_4lanes/AGAGTTGT_readname.txt.R1.bed.hg18.uniq	32418	22882	0.294158
./GB941593_4lanes/ATACGACT_readname.txt.R1.bed.hg18.uniq	70764	50969	0.279733
./GB941593_4lanes/ATGACACC_readname.txt.R1.bed.hg18.uniq	9368	6797	0.274445
./GB941593_4lanes/ATGACTGT_readname.txt.R1.bed.hg18.uniq	5526	4079	0.261853
./GB941593_4lanes/CAAGATAT_readname.txt.R1.bed.hg18.uniq	279372	194228	0.304769
./GB941593_4lanes/CAAGGTCA_readname.txt.R1.bed.hg18.uniq	8331	6074	0.270916
./GB941593_4lanes/CAGCTCTT_readname.txt.R1.bed.hg18.uniq	251145	179269	0.286193
./GB941593_4lanes/CATAACTT_readname.txt.R1.bed.hg18.uniq	12263	9113	0.25687
./GB941593_4lanes/CATGTAGA_readname.txt.R1.bed.hg18.uniq	9049	6732	0.25605
./GB941593_4lanes/CATGTATT_readname.txt.R1.bed.hg18.uniq	24288	16885	0.304801
./GB941593_4lanes/CGTAATTA_readname.txt.R1.bed.hg18.uniq	34124	25335	0.257561
./GB941593_4lanes/CTGACGTT_readname.txt.R1.bed.hg18.uniq	4797	3505	0.269335
./GB941593_4lanes/GACGTTAA_readname.txt.R1.bed.hg18.uniq	33300	23308	0.30006
./GB941593_4lanes/GACTAAGA_readname.txt.R1.bed.hg18.uniq	54005	38562	0.285955
./GB941593_4lanes/GGTCAATG_readname.txt.R1.bed.hg18.uniq	132007	93407	0.292409
./GB941593_4lanes/GTGAACGT_readname.txt.R1.bed.hg18.uniq	5676	4273	0.247181
./GB941593_4lanes/TACACTGT_readname.txt.R1.bed.hg18.uniq	133792	95252	0.288059
./GB941593_4lanes/TACAGTGT_readname.txt.R1.bed.hg18.uniq	11818	8643	0.268658
./GB941593_4lanes/TAGCAGTT_readname.txt.R1.bed.hg18.uniq	5888	4502	0.235394
./GB941593_4lanes/TCCTGCTG_readname.txt.R1.bed.hg18.uniq	60936	43253	0.29019
./GB941593_4lanes/TGGACATG_readname.txt.R1.bed.hg18.uniq	42079	29987	0.287364
./GB941593_4lanes/TGGCGTAT_readname.txt.R1.bed.hg18.uniq	2701	2091	0.225842
./GB941593_4lanes/TTCACGAT_readname.txt.R1.bed.hg18.uniq	135622	96746	0.28665
./GB941594_4lanes/AGAATCAG_readname.txt.R1.bed.hg18.uniq	4570	3405	0.254923
./GB941594_4lanes/AGAGTTGT_readname.txt.R1.bed.hg18.uniq	31189	22376	0.282568
./GB941594_4lanes/AGGCTTGA_readname.txt.R1.bed.hg18.uniq	18803	13414	0.286603
./GB941594_4lanes/AGGTTGCT_readname.txt.R1.bed.hg18.uniq	6888	4803	0.3027
./GB941594_4lanes/ATACGACT_readname.txt.R1.bed.hg18.uniq	125068	90372	0.277417
./GB941594_4lanes/ATAGATAC_readname.txt.R1.bed.hg18.uniq	49576	35182	0.290342
./GB941594_4lanes/ATGACACC_readname.txt.R1.bed.hg18.uniq	32356	23411	0.276456
./GB941594_4lanes/CAATGTGT_readname.txt.R1.bed.hg18.uniq	9071	6555	0.277367
./GB941594_4lanes/CAATTCGT_readname.txt.R1.bed.hg18.uniq	8479	6023	0.289657
./GB941594_4lanes/CAGCTCTT_readname.txt.R1.bed.hg18.uniq	18034	12680	0.296884
./GB941594_4lanes/CATGGTGT_readname.txt.R1.bed.hg18.uniq	20157	13986	0.306147
./GB941594_4lanes/CTAAGTGT_readname.txt.R1.bed.hg18.uniq	71653	51436	0.282151
./GB941594_4lanes/CTTCGTTG_readname.txt.R1.bed.hg18.uniq	20992	15171	0.277296
./GB941594_4lanes/GACGTTAA_readname.txt.R1.bed.hg18.uniq	1408	1076	0.235795
./GB941594_4lanes/GACTAAGA_readname.txt.R1.bed.hg18.uniq	6797	4882	0.281742
./GB941594_4lanes/GATATTGT_readname.txt.R1.bed.hg18.uniq	27094	19307	0.287407
./GB941594_4lanes/GCTTAGTA_readname.txt.R1.bed.hg18.uniq	14290	10325	0.277467
./GB941594_4lanes/GGATCATC_readname.txt.R1.bed.hg18.uniq	36378	26082	0.283028
./GB941594_4lanes/TACACTGT_readname.txt.R1.bed.hg18.uniq	22998	16632	0.276807
./GB941594_4lanes/TAGCAGTT_readname.txt.R1.bed.hg18.uniq	5556	4163	0.25072
./GB941594_4lanes/TCAAGTTG_readname.txt.R1.bed.hg18.uniq	74744	53480	0.284491
./GB941594_4lanes/TCATCGTG_readname.txt.R1.bed.hg18.uniq	43108	30390	0.295026
./GB941594_4lanes/TCCGGTAT_readname.txt.R1.bed.hg18.uniq	83802	59759	0.286902
./GB941594_4lanes/TCGTTAGC_readname.txt.R1.bed.hg18.uniq	5333	3883	0.271892
./GB941595_4lanes/AATGACAG_readname.txt.R1.bed.hg18.uniq	4458	3342	0.250336
./GB941595_4lanes/ACTGCATG_readname.txt.R1.bed.hg18.uniq	14665	10451	0.287351
./GB941595_4lanes/AGCAATCC_readname.txt.R1.bed.hg18.uniq	5355	4122	0.230252
./GB941595_4lanes/ATACGACT_readname.txt.R1.bed.hg18.uniq	5322	3973	0.253476
./GB941595_4lanes/ATAGATAC_readname.txt.R1.bed.hg18.uniq	1382	1113	0.194645
./GB941595_4lanes/ATCTGATG_readname.txt.R1.bed.hg18.uniq	7711	5764	0.252496
./GB941595_4lanes/ATGGACTG_readname.txt.R1.bed.hg18.uniq	14832	10423	0.297263
./GB941595_4lanes/ATTGGCGT_readname.txt.R1.bed.hg18.uniq	1581	1268	0.197976
./GB941595_4lanes/CAAGGTCA_readname.txt.R1.bed.hg18.uniq	7935	5943	0.25104
./GB941595_4lanes/CAATTCGT_readname.txt.R1.bed.hg18.uniq	106815	76361	0.28511
./GB941595_4lanes/CATAACTT_readname.txt.R1.bed.hg18.uniq	5378	4122	0.233544
./GB941595_4lanes/CATGGTGT_readname.txt.R1.bed.hg18.uniq	10005	8759	0.124538
./GB941595_4lanes/CATGTAGA_readname.txt.R1.bed.hg18.uniq	25097	18220	0.274017
./GB941595_4lanes/CATGTGTG_readname.txt.R1.bed.hg18.uniq	26682	19127	0.28315
./GB941595_4lanes/CGAGAATG_readname.txt.R1.bed.hg18.uniq	35049	24878	0.290194
./GB941595_4lanes/GAGACCTT_readname.txt.R1.bed.hg18.uniq	39616	28628	0.277363
./GB941595_4lanes/GAGCGATA_readname.txt.R1.bed.hg18.uniq	8045	6003	0.253822
./GB941595_4lanes/GATGGCTT_readname.txt.R1.bed.hg18.uniq	83230	59571	0.28426
./GB941595_4lanes/GTCTCCTA_readname.txt.R1.bed.hg18.uniq	9816	7224	0.264059
./GB941595_4lanes/TAACCAAG_readname.txt.R1.bed.hg18.uniq	6120	4534	0.25915
./GB941595_4lanes/TACACTGT_readname.txt.R1.bed.hg18.uniq	89077	63828	0.283451
./GB941595_4lanes/TGCAGACA_readname.txt.R1.bed.hg18.uniq	169844	120145	0.292616
./GB941595_4lanes/TGGCGTAT_readname.txt.R1.bed.hg18.uniq	13945	10252	0.264826
[truncated: 8,492 more rows]
