# Supplementary material for: Profiling single-cell histone modifications using indexing chromatin immunocleavage sequencing
Source: HighWire-hosted journal article supplement (doi:10.1101/gr.260893.120), 2021-04-14
Supplement: Supplemental_Table_S4.xlsx [file Supplemental_Table_S4.xlsx]

## Sheet: H3K4me3 
Table S4. The information of data sets used in this study
Biosampletermname	Assay	Biosampleorganism	Experimenttarget	FileaccessionorGEOnumber	Use-1	Use-2	Use-3	Use-4
B_cell	ChIP-seq	Homosapiens	H3K4me3	ENCFF715ZJM	callpeaks	combinedpeaks	combined bed files for scatter plots
B_cell	ChIP-seq	Homosapiens	H3K4me3	ENCFF136DRG	callpeaks	combinedpeaks	combined bed files for scatter plots
B_cell	ChIP-seq	Homosapiens	H3K4me3	ENCFF751FJK	callpeaks	combinedpeaks	combined bed files for scatter plots	use for the calculation of B cell specific peaks
B_cell	ChIP-seq	Homosapiens	H3K4me3	ENCFF927VYA	callpeaks	combinedpeaks	combined bed files for scatter plots	use for the calculation of B cell specific peaks
B_cell	ChIP-seq	Homosapiens	H3K4me3	ENCFF001ETL	callpeaks	combinedpeaks	combined bed files for scatter plots	use for the calculation of B cell specific peaks
B_cell	ChIP-seq	Homosapiens	H3K4me3	ENCFF001ETS	callpeaks	combinedpeaks	combined bed files for scatter plots	use for the calculation of B cell specific peaks
B_cell	ChIP-seq	Homosapiens	H3K4me3	ENCFF001EUE	callpeaks	combinedpeaks	combined bed files for scatter plots	use for the calculation of B cell specific peaks
B_cell	ChIP-seq	Homosapiens	H3K4me3	ENCFF761FXO	callpeaks	combinedpeaks	combined bed files for scatter plots
B_cell	ChIP-seq	Homosapiens	H3K4me3	ENCFF527EXT	callpeaks	combinedpeaks	combined bed files for scatter plots
B_cell	ChIP-seq	Homosapiens	H3K4me3	ENCFF659TTV	callpeaks	combinedpeaks	combined bed files for scatter plots
CD14-positive_monocyte	ChIP-seq	Homosapiens	H3K4me3	ENCFF820FZP	callpeaks	combinedpeaks	combined bed files for scatter plots	use for the calculation of Mono specific peaks
CD14-positive_monocyte	ChIP-seq	Homosapiens	H3K4me3	ENCFF992EVR	callpeaks	combinedpeaks	combined bed files for scatter plots	use for the calculation of Mono specific peaks
CD14-positive_monocyte	ChIP-seq	Homosapiens	H3K4me3	ENCFF000CDX	callpeaks	combinedpeaks	combined bed files for scatter plots	use for the calculation of Mono specific peaks
CD14-positive_monocyte	ChIP-seq	Homosapiens	H3K4me3	ENCFF000CDZ	callpeaks	combinedpeaks	combined bed files for scatter plots	use for the calculation of Mono specific peaks
CD14-positive_monocyte	ChIP-seq	Homosapiens	H3K4me3	ENCFF399MSH	callpeaks	combinedpeaks	combined bed files for scatter plots	use for the calculation of Mono specific peaks
CD14-positive_monocyte	ChIP-seq	Homosapiens	H3K4me3	ENCFF001FYS	callpeaks	combinedpeaks	combined bed files for scatter plots	use for the calculation of Mono specific peaks
effector_memory_CD4-positive,_alpha-beta_T_cell	ChIP-seq	Homosapiens	H3K4me3	ENCFF555SFB	callpeaks	combinedpeaks	combined bed files for scatter plots
effector_memory_CD4-positive,_alpha-beta_T_cell	ChIP-seq	Homosapiens	H3K4me3	ENCFF803VBK	callpeaks	combinedpeaks	combined bed files for scatter plots
effector_memory_CD4-positive,_alpha-beta_T_cell	ChIP-seq	Homosapiens	H3K4me3	ENCFF930GNJ	callpeaks	combinedpeaks	combined bed files for scatter plots
CD4-positive,_alpha-beta_memory_T_cell	ChIP-seq	Homosapiens	H3K4me3	ENCFF375PTJ	callpeaks	combinedpeaks	combined bed files for scatter plots
CD4-positive,_alpha-beta_memory_T_cell	ChIP-seq	Homosapiens	H3K4me3	ENCFF854DDN	callpeaks	combinedpeaks	combined bed files for scatter plots
CD4-positive,_alpha-beta_memory_T_cell	ChIP-seq	Homosapiens	H3K4me3	ENCFF174XKM	callpeaks	combinedpeaks	combined bed files for scatter plots
CD4-positive,_CD25-positive,_alpha-beta_regulatory_T_cell	ChIP-seq	Homosapiens	H3K4me3	ENCFF237UOO	callpeaks	combinedpeaks	combined bed files for scatter plots
CD4-positive,_CD25-positive,_alpha-beta_regulatory_T_cell	ChIP-seq	Homosapiens	H3K4me3	ENCFF284JJI	callpeaks	combinedpeaks	combined bed files for scatter plots
CD4-positive,_CD25-positive,_alpha-beta_regulatory_T_cell	ChIP-seq	Homosapiens	H3K4me3	ENCFF674TBI	callpeaks	combinedpeaks	combined bed files for scatter plots
CD4-positive,_CD25-positive,_alpha-beta_regulatory_T_cell	ChIP-seq	Homosapiens	H3K4me3	ENCFF735REY	callpeaks	combinedpeaks	combined bed files for scatter plots
CD4-positive,_CD25-positive,_alpha-beta_regulatory_T_cell	ChIP-seq	Homosapiens	H3K4me3	ENCFF197RCF	callpeaks	combinedpeaks	combined bed files for scatter plots
CD4-positive,_CD25-positive,_alpha-beta_regulatory_T_cell	ChIP-seq	Homosapiens	H3K4me3	ENCFF984PWZ	callpeaks	combinedpeaks	combined bed files for scatter plots
CD4-positive,_CD25-positive,_alpha-beta_regulatory_T_cell	ChIP-seq	Homosapiens	H3K4me3	ENCFF377FRN	callpeaks	combinedpeaks	combined bed files for scatter plots
CD4-positive,_CD25-positive,_alpha-beta_regulatory_T_cell	ChIP-seq	Homosapiens	H3K4me3	ENCFF351YUN	callpeaks	combinedpeaks	combined bed files for scatter plots
CD4-positive,_alpha-beta_T_cell	ChIP-seq	Homosapiens	H3K4me3	ENCFF051MYP	callpeaks	combinedpeaks	combined bed files for scatter plots
CD4-positive,_alpha-beta_T_cell	ChIP-seq	Homosapiens	H3K4me3	ENCFF968VEH	callpeaks	combinedpeaks	combined bed files for scatter plots
T-helper_17_cell	ChIP-seq	Homosapiens	H3K4me3	ENCFF188NDB	callpeaks	combinedpeaks	combined bed files for scatter plots
T-helper_17_cell	ChIP-seq	Homosapiens	H3K4me3	ENCFF048DRW	callpeaks	combinedpeaks	combined bed files for scatter plots
T-helper_17_cell	ChIP-seq	Homosapiens	H3K4me3	ENCFF051QBE	callpeaks	combinedpeaks	combined bed files for scatter plots	use for the calculation of T cell specific peaks
T-helper_17_cell	ChIP-seq	Homosapiens	H3K4me3	ENCFF499FKL	callpeaks	combinedpeaks	combined bed files for scatter plots	use for the calculation of T cell specific peaks
CD4-positive,_alpha-beta_T_cell	ChIP-seq	Homosapiens	H3K4me3	ENCFF265POO	callpeaks	combinedpeaks	combined bed files for scatter plots	use for the calculation of T cell specific peaks
CD4-positive,_alpha-beta_T_cell	ChIP-seq	Homosapiens	H3K4me3	ENCFF717GRF	callpeaks	combinedpeaks	combined bed files for scatter plots	use for the calculation of T cell specific peaks
CD4-positive,_alpha-beta_T_cell	ChIP-seq	Homosapiens	H3K4me3	ENCFF032FLM	callpeaks	combinedpeaks	combined bed files for scatter plots	use for the calculation of T cell specific peaks
CD4-positive,_alpha-beta_T_cell	ChIP-seq	Homosapiens	H3K4me3	ENCFF534ZEZ	callpeaks	combinedpeaks	combined bed files for scatter plots	use for the calculation of T cell specific peaks
CD4-positive,_alpha-beta_T_cell	ChIP-seq	Homosapiens	H3K4me3	ENCFF124FAJ	callpeaks	combinedpeaks	combined bed files for scatter plots	use for the calculation of T cell specific peaks
CD4-positive,_alpha-beta_T_cell	ChIP-seq	Homosapiens	H3K4me3	ENCFF546HLT	callpeaks	combinedpeaks	combined bed files for scatter plots	use for the calculation of T cell specific peaks
CD4-positive,_alpha-beta_T_cell	ChIP-seq	Homosapiens	H3K4me3	ENCFF992ODQ	callpeaks	combinedpeaks	combined bed files for scatter plots	use for the calculation of T cell specific peaks
naive_thymus-derived_CD4-positive,_alpha-beta_T_cell	ChIP-seq	Homosapiens	H3K4me3	ENCFF799ECK	callpeaks	combinedpeaks	combined bed files for scatter plots
naive_thymus-derived_CD4-positive,_alpha-beta_T_cell	ChIP-seq	Homosapiens	H3K4me3	ENCFF495BXH	callpeaks	combinedpeaks	combined bed files for scatter plots
naive_thymus-derived_CD4-positive,_alpha-beta_T_cell	ChIP-seq	Homosapiens	H3K4me3	ENCFF608SRY	callpeaks	combinedpeaks	combined bed files for scatter plots
naive_thymus-derived_CD4-positive,_alpha-beta_T_cell	ChIP-seq	Homosapiens	H3K4me3	ENCFF304DCD	callpeaks	combinedpeaks	combined bed files for scatter plots
CD8-positive,_alpha-beta_T_cell	ChIP-seq	Homosapiens	H3K4me3	ENCFF226TMT	callpeaks	combinedpeaks	combined bed files for scatter plots
common_myeloid_progenitor,_CD34-positive	ChIP-seq	Homosapiens	H3K4me3	ENCFF821LDR	callpeaks	combinedpeaks	combined bed files for scatter plots
common_myeloid_progenitor,_CD34-positive	ChIP-seq	Homosapiens	H3K4me3	ENCFF056QSP	callpeaks	combinedpeaks	combined bed files for scatter plots
common_myeloid_progenitor,_CD34-positive	ChIP-seq	Homosapiens	H3K4me3	ENCFF600IWZ	callpeaks	combinedpeaks	combined bed files for scatter plots
common_myeloid_progenitor,_CD34-positive	ChIP-seq	Homosapiens	H3K4me3	ENCFF049RFA	callpeaks	combinedpeaks	combined bed files for scatter plots
common_myeloid_progenitor,_CD34-positive	ChIP-seq	Homosapiens	H3K4me3	ENCFF495FYE	callpeaks	combinedpeaks	combined bed files for scatter plots
common_myeloid_progenitor,_CD34-positive	ChIP-seq	Homosapiens	H3K4me3	ENCFF094SKJ	callpeaks	combinedpeaks	combined bed files for scatter plots
common_myeloid_progenitor,_CD34-positive	ChIP-seq	Homosapiens	H3K4me3	ENCFF357RXZ	callpeaks	combinedpeaks	combined bed files for scatter plots
common_myeloid_progenitor,_CD34-positive	ChIP-seq	Homosapiens	H3K4me3	ENCFF553IAN	callpeaks	combinedpeaks	combined bed files for scatter plots
common_myeloid_progenitor,_CD34-positive	ChIP-seq	Homosapiens	H3K4me3	ENCFF102IJI	callpeaks	combinedpeaks	combined bed files for scatter plots
mononuclear_cell	ChIP-seq	Homosapiens	H3K4me3	ENCFF000VKA	callpeaks	combinedpeaks	combined bed files for scatter plots
mononuclear_cell	ChIP-seq	Homosapiens	H3K4me3	ENCFF000VKB	callpeaks	combinedpeaks	combined bed files for scatter plots
naïveTcell	ChIP-seq	Homosapiens	H3K4me3	GSM2370630	callpeaks	combinedpeaks	combined bed files for scatter plots
natural_killer_cell	ChIP-seq	Homosapiens	H3K4me3	ENCFF679OKE	callpeaks	combinedpeaks	combined bed files for scatter plots	use for the calculation of NK cell specific peaks
natural_killer_cell	ChIP-seq	Homosapiens	H3K4me3	ENCFF573HXM	callpeaks	combinedpeaks	combined bed files for scatter plots	use for the calculation of NK cell specific peaks
neutrophil	ChIP-seq	Homosapiens	H3K4me3	ENCFF504IDI	callpeaks	combinedpeaks	combined bed files for scatter plots
neutrophil	ChIP-seq	Homosapiens	H3K4me3	ENCFF327MDK	callpeaks	combinedpeaks	combined bed files for scatter plots
neutrophil	ChIP-seq	Homosapiens	H3K4me3	ENCFF098KGS	callpeaks	combinedpeaks	combined bed files for scatter plots
neutrophil	ChIP-seq	Homosapiens	H3K4me3	ENCFF289JFE	callpeaks	combinedpeaks	combined bed files for scatter plots
neutrophil	ChIP-seq	Homosapiens	H3K4me3	ENCFF497CHK	callpeaks	combinedpeaks	combined bed files for scatter plots
neutrophil	ChIP-seq	Homosapiens	H3K4me3	ENCFF798QNJ	callpeaks	combinedpeaks	combined bed files for scatter plots
neutrophil	ChIP-seq	Homosapiens	H3K4me3	ENCFF834WLD	callpeaks	combinedpeaks	combined bed files for scatter plots
neutrophil	ChIP-seq	Homosapiens	H3K4me3	ENCFF960QVI	callpeaks	combinedpeaks	combined bed files for scatter plots
T-cell	ChIP-seq	Homosapiens	H3K4me3	ENCFF550WEX	callpeaks	combinedpeaks	combined bed files for scatter plots
T-cell	ChIP-seq	Homosapiens	H3K4me3	ENCFF314USP	callpeaks	combinedpeaks	combined bed files for scatter plots

## Sheet: RNA-seq
Biosample term name	Assay	Biosample organism	File accession or GEO number
B cell	RNA-seq	Homo sapiens	GSM1256812
B cell	RNA-seq	Homo sapiens	GSM1256813
B cell	RNA-seq	Homo sapiens	GSM1256814
B cell	RNA-seq	Homo sapiens	GSM1256815
B cell	RNA-seq	Homo sapiens	GSM1256816
Monocytes	RNA-seq	Homo sapiens	GSM1256822
Monocytes	RNA-seq	Homo sapiens	GSM1256823
Monocytes	RNA-seq	Homo sapiens	GSM1256824
Monocytes	RNA-seq	Homo sapiens	GSM1256825
Monocytes	RNA-seq	Homo sapiens	GSM1256826
T cell	RNA-seq	Homo sapiens	GSM1256828
T cell	RNA-seq	Homo sapiens	GSM1256829
NK cell	RNA-seq	Homo sapiens	GSM1982286
NK cell	RNA-seq	Homo sapiens	GSM1982287
NK cell	RNA-seq	Homo sapiens	GSM1982293

## Sheet: H3K27me3
Biosample term name	Assay	Biosample organism	Experiment target	File accession or GEO number	Use-1	Use -2	Use-3
B cell	ChIP-seq	Homo sapiens	H3K27me3	ENCFF529PGJ	Call peaks and combined bed files for scatter plot	Combined peaks	genome broswer
B cell	ChIP-seq	Homo sapiens	H3K27me3	ENCFF705DLT	Call peaks and combined bed files for scatter plot	Combined peaks
CD14-positive monocyte	ChIP-seq	Homo sapiens	H3K27me3	ENCFF001FYR	Call peaks and combined bed files for scatter plot	Combined peaks	genome broswer
CD14-positive monocyte	ChIP-seq	Homo sapiens	H3K27me3	ENCFF127BPU	Call peaks and combined bed files for scatter plot	Combined peaks
CD4-positive, alpha-beta memory T cell	ChIP-seq	Homo sapiens	H3K27me3	ENCFF576BBU	Call peaks and combined bed files for scatter plot	Combined peaks
CD4-positive, alpha-beta memory T cell	ChIP-seq	Homo sapiens	H3K27me3	ENCFF991QCC	Call peaks and combined bed files for scatter plot	Combined peaks
CD4-positive, alpha-beta T cell	ChIP-seq	Homo sapiens	H3K27me3	ENCFF691MOI	Call peaks and combined bed files for scatter plot	Combined peaks
CD4-positive, alpha-beta T cell	ChIP-seq	Homo sapiens	H3K27me3	ENCFF815XHM	Call peaks and combined bed files for scatter plot	Combined peaks	genome broswer
CD4-positive, CD25-positive, alpha-beta regulatory T cell	ChIP-seq	Homo sapiens	H3K27me3	ENCFF010QBJ	Call peaks and combined bed files for scatter plot	Combined peaks
CD4-positive, CD25-positive, alpha-beta regulatory T cell	ChIP-seq	Homo sapiens	H3K27me3	ENCFF549FJX	Call peaks and combined bed files for scatter plot	Combined peaks
CD8-positive, alpha-beta T cell	ChIP-seq	Homo sapiens	H3K27me3	ENCFF784OKP	Call peaks and combined bed files for scatter plot	Combined peaks
CD8-positive, alpha-beta T cell	ChIP-seq	Homo sapiens	H3K27me3	ENCFF921LVS	Call peaks and combined bed files for scatter plot	Combined peaks
effector memory CD4-positive, alpha-beta T cell	ChIP-seq	Homo sapiens	H3K27me3	ENCFF085HVZ	Call peaks and combined bed files for scatter plot	Combined peaks
effector memory CD4-positive, alpha-beta T cell	ChIP-seq	Homo sapiens	H3K27me3	ENCFF173ACS	Call peaks and combined bed files for scatter plot	Combined peaks
naive thymus-derived CD4-positive, alpha-beta T cell	ChIP-seq	Homo sapiens	H3K27me3	ENCFF196VTT	Call peaks and combined bed files for scatter plot	Combined peaks
naive thymus-derived CD4-positive, alpha-beta T cell	ChIP-seq	Homo sapiens	H3K27me3	ENCFF509MTV	Call peaks and combined bed files for scatter plot	Combined peaks
T-cell	ChIP-seq	Homo sapiens	H3K27me3	ENCFF503UGV	Call peaks and combined bed files for scatter plot	Combined peaks
T-cell	ChIP-seq	Homo sapiens	Homo sapiens	ENCFF687JRX	Call peaks and combined bed files for scatter plot	Combined peaks
NK cells	ChIP-seq	Homo sapiens	Homo sapiens	SRR609646	Call peaks and combined bed files for scatter plot	Combined peaks	genome broswer
